# Supplementary material for: A diet containing Moringa oleifera alters the goat rumen microbiome: an insight into bacteria, ciliates and rumen anaerobic fungi
Source: Research Square preprint supplement (doi:10.21203/rs.3.rs-8826260/v1), 2026-02-23
Supplement: Supplementary file 1 [file 2a71259ad844cbc77c1faf77.xlsx]

## Sheet: 7A
Supplementary Table 7A. Significant discrimianat features identified through LEfSe analysis in rumen solid fraction of 16SrRNA amplicon data at genus level (LDA score-≥3.0 and P-value- ≤0.05)
Biomarkername	Log10averageabundance	Group	LDA	P-value
Sodaliphilus	4.79404	MS	4.27725	0.0359102
Anseongella	4.18825	MS	3.64622	0.0476522
Syntrophococcus	4.1297	MS	3.53882	0.0256696
Fibrobacter	4.20598	MS	3.70624	0.0456508
Streptophyta	4.27004	MS	3.81917	0.00684048
Olsenella	4.12682	MS	3.73661	0.0420722
Duncaniella	3.93379	MS	3.40545	0.0447491
Alistipes	3.79315	MS	3.21518	0.0428609
Halothermothrix	3.64273	MS	3.18566	0.0255637
Extibacter	3.71604	MS	3.32138	0.0243033
Lancefieldella	3.69396	MS	3.29952	0.0295473
Olivibacter	3.62786	MS	3.29381	0.00366076
Ruminococcus	4.2513	20%MLM	3.67431	0.00464275
Pseudobutyrivibrio	4.18879	20%MLM	3.81278	0.0283302
Coprococcus	3.90501	20%MLM	3.475	0.00391153
Brotonthovivens	3.52932	20%MLM	3.09146	0.0112626
SR1_genera_incertae_sedis	3.28049	20%MLM	3.03293	0.00397741
Saccharofermentans	4.43403	30%MLM	4.01731	0.00609799
Butyrivibrio	4.36851	30%MLM	3.87506	0.032032
Enterocloster	4.51154	30%MLM	4.15897	0.0432232
Ruminobacter	4.03287	30%MLM	3.60468	0.0265934
Saccharibacteria_genera_incertae_sedis	3.96806	30%MLM	3.61882	0.00443438
Barnesiella	3.78402	30%MLM	3.34986	0.0267172
Anaeroplasma	3.55661	30%MLM	3.19684	0.00595806
Flavobacterium	3.65035	30%MLM	3.26807	0.0176204

## Sheet: 7B
Supplementary Table 7B. Significant discrimianat features identified through LEfSe analysis in rumen liquid fraction of 16SrRNA amplicon data at genus level (LDA score-≥3.0 and P-value- ≤0.05)
Biomarkername	Log10averageabundance	Group	LDA	P-value
Sodaliphilus	4.57833	MS	4.15373	0.0137422
Syntrophococcus	4.03709	MS	3.58172	0.00582174
Olsenella	4.34686	MS	3.94674	0.0181539
Extibacter	3.57914	MS	3.15755	0.0322466
Slackia	4.11684	MS	3.71742	0.0178951
Adlercreutzia	3.541	MS	3.16109	0.00643058
Berryella	3.67785	MS	3.33783	0.00445788
Subdivision5_genera_incertae_sedis	5.07901	20%MLM	4.49571	0.0220602
Duncaniella	4.04421	20%MLM	3.51209	0.0440183
Algoriphagus	3.31588	20%MLM	3.00527	0.0170905
Ruminococcus	4.31335	30%MLM	3.63634	0.0453109
Paraprevotella	4.35363	30%MLM	3.89063	0.0121585
Ruminococcoides	3.56636	30%MLM	3.09088	0.0450189
Flexilinea	3.8747	30%MLM	3.36576	0.0115859
Methanobrevibacter	3.80142	30%MLM	3.35472	0.0113767
Vescimonas	4.02805	30%MLM	3.55685	0.0161794
Solobacterium	3.74742	30%MLM	3.3073	0.00662637
Blautia	3.91616	30%MLM	3.39144	0.0104667
Acetivibrio	3.71584	30%MLM	3.20756	0.00457072
Succinimonas	3.68908	30%MLM	3.3984	0.00756753

## Sheet: 7C
Supplementary Table 7C: Significant discrimianat features identified through LEfSe analysis in rumen liquid fraction of 16SrRNA amplicon data at genus level (LDA score-≥3.0 and P-value- ≤0.05)
Biomarkername	Log10averageabundance	Group	LDA	P-value
Entodinium	5.21466	MS	4.78497	0.000555073
Trichostomatia_XX	4.94244	MS	4.07846	0.0290841
Entodinium_1	4.75994	MS	4.25897	0.000613279
Ophryoscolecidae_1_X	4.54111	MS	4.07147	0.00325625
Metadinium	4.28631	30%MLM	3.90508	0.022703
Diploplastron	5.07842	30%MLM	4.37288	0.00475607
Dasytricha	4.85126	20%MLM	4.31496	0.0135947
Eremoplastron	4.45551	20%MLM	3.8947	0.0153122
Isotrichidae_2_X	3.92013	20%MLM	3.33326	0.0283515
Diplodinium	4.35924	20%MLM	4.11335	0.0495832
