# Supplementary material for: A diet containing Moringa oleifera alters the goat rumen microbiome: an insight into bacteria, ciliates and rumen anaerobic fungi
Source: Research Square preprint supplement (doi:10.21203/rs.3.rs-8826260/v1), 2026-02-23
Supplement: Supplementary file 2 [file 58ac91dbea8b0425cf574941.xlsx]

## Sheet: 2A
Supplementary Table 2A: Total no. of 16SrRNA reads obtained and percentage reads classified to genus level per sample
Rumen solid fraction				Rumen liquid fraction				Fecal
Sample	Read count	% Reads Classified to genus		Sample	Read count	% Reads Classified to genus		Sample	Read count	% Reads Classified to genus
G12S	131384	80.77%		G12L	167651	80.47%		G12F	472409	0.7886
G14S	76640	76.44%		G13L	153970	77.1%		G13F	285324	72.83%
G16S	265580	79.75%		G15L	64801	82.5%		G14F	356758	73.59%
G19S	125716	80.62%		G18L	101701	83.67%		G15F	250851	77.02%
G110S	128139	84.69%		G21L	89513	80.43%		G16F	220013	73.49%
G21S	120831	82.64%		G22L	117911	86.87%		G17F	3068651	77.71%
G22S	125593	85.14%		G23L	464488	86.97%		G19F	356772	75.66%
G23S	103783	85.37%		G24L	214047	85.42%		G21F	481027	73.85%
G24S	119901	87.1%		G25L	206953	82.06%		G22F	1249739	74.62%
G25S	122484	81.18%		G26L	253429	81.69%		G23F	181101	72.5%
G26S	127756	81.38%		G27L	192932	81.17%		G24F	165122	72.2%
G27S	120152	78.52%		G28L	209120	78.65%		G25F	144893	72.03%
G28S	135324	78.05%		G31L	208638	78.49%		G26F	184742	76.44%
G31S	103178	77.53%		G32L	252765	76.92%		G27F	164930	74.22%
G33S	140787	81.8%		G33L	134536	77.53%		G28F	221608	72.71%
G34S	110821	86.83%		G34L	532435	80.75%		G31F	198395	72.23%
G37S	142859	80.93%		G35L	321672	79.97%		G32F	198959	76.27%
G38S	112878	80.81%		G37L	269171	81.93%		G34F	219296	72.5%
G39S	123018	76.06%		G38L	344556	81.52%		G35F	219048	74.81%
G310S	154052	81.09%		G39L	305394	79.16%		G37F	172403	72.27%
				G310L	5439994	83.49%		G38F	218709	71.72%
								G39F	233501	73.13%
G12F	472409	0.7886
G13F	285324	72.83%
G14F	356758	73.59%
G15F	250851	77.02%
G16F	220013	73.49%
G17F	3068651	77.71%
G19F	356772	75.66%
G21F	481027	73.85%
G22F	1249739	74.62%
G23F	181101	72.5%
G24F	165122	72.2%
G25F	144893	72.03%
G26F	184742	76.44%
G27F	164930	74.22%
G28F	221608	72.71%
G31F	198395	72.23%
G32F	198959	76.27%
G34F	219296	72.5%
G35F	219048	74.81%
G37F	172403	72.27%
G38F	218709	71.72%
G39F	233501	73.13%

## Sheet: 2B
Supplementary Table 2B: Total no. of 18SrRNA reads obtained and percentage reads classified to genus level per sample
Rumen samples					Fecal samples
Sample	Read count	% Reads Classified to genus			Sample	Read count	% Reads Classified to genus
G12R	1072322	0.8063			G11F	413888	90.09%
G13R	432307	0.817			G13F	739308	90.64%
G14R	405137	0.8035			G14F	626093	90.96%
G15R	746761	0.7051			G15F	660882	90.81%
G16R	442901	0.8275			G16F	1230046	91.12%
G17R	407839	0.8109			G18F	323149	88.45%
G18R	427812	0.7773			G19F	1173039	91.87%
G19R	399157	0.847			G21F	342765	88.16%
G21R	722800	0.8021			G22F	447493	91.08%
G22R	705151	0.8323			G23F	448065	90.85%
G23R	1058424	0.8254			G25F	554415	90.28%
G24R	1161828	0.8183			G26F	572094	89.86%
G25R	988934	0.7898			G28F	577931	89.69%
G26R	1066545	0.8927			G29F	408949	88.73%
G27R	1753483	0.8458			G31F	449534	89.39%
G28R	2090633	0.8333			G32F	590413	90.78%
G31R	1688646	0.8754			G33F	512327	91.52%
G32R	1755237	0.839			G34F	371583	88.92%
G33R	614393	0.8146			G35F	438265	92.89%
G34R	1249780	0.8412			G36F	443374	91.11%
G35R	2376005	0.8637			G37F	427161	91.07%
G37R	1301680	0.7597			G38F	327253	90.38%
G38R	1102236	0.8217			G39F	425712	90.78%
G39R	2845452	0.8237
G310R	443117	0.8089

## Sheet: 2C
Supplementary Table 2C: Total no. of anaerobic fungus (ITS 1) reads obtained and percentage reads classified to genus level per sample
Rumen solid fraction					Rumen liquid fraction
Sample	Read count	% Reads Classified to genus		Sample	Read count	% Reads Classified to genus
G12S	350095	99.12%		G11L	100547	96.25%
G14S	129779	98.32%		G12L	67452	99.03%
G16S	90018	96.91%		G13L	94529	98.63%
G17S	61518	97.29%		G15L	203774	90.32%
G110S	80747	95.4%		G17L	76107	97.31%
G21S	80305	93.77%		G18L	129043	95.53%
G22S	191908	97.36%		G19L	56506	96.41%
G23S	107395	94.53%		G110L	112335	83.85%
G24S	550666	94.89%		G21L	82458	88.77%
G25S	95585	92.73%		G22L	261831	96.9%
G26S	56678	92.4%		G23L	64662	95.35%
G27S	68881	97.73%		G24L	112117	88.22%
G28S	75257	93.82%		G25L	111801	91.48%
G310S	63055	98.05%		G26L	95015	87.55%
G31S	85748	97.61%		G27L	287573	97.84%
G32S	153636	97.01%		G28L	69523	92.74%
G33S	56568	96.27%		G31L	106779	96.77%
G35S	104632	96.97%		G32L	87593	97.39%
G37S	84947	92.16%		G34L	109447	96.73%
G39S	104814	98.73%		G35L	206152	95.48%
				G37L	51772	91.34%
				G38L	230740	94.93%
				G39L	203241	97.91%
				G310L	88565	96.72%
