# Supplementary material for: A diet containing Moringa oleifera alters the goat rumen microbiome: an insight into bacteria, ciliates and rumen anaerobic fungi
Source: Research Square preprint supplement (doi:10.21203/rs.3.rs-8826260/v1), 2026-02-23
Supplement: Supplementary file 3 [file 8526d28a3542f2f782137bf5.xlsx]

## Sheet: 6A
Supplementry Table 6A : Groupwise mean relative abundance (%) of fungi at the phylum level present in rumen solid and liquid fractions.
Rumen Solid Fraction
Phylum	p-values	MS: mean rel. freq. (%)	MS: std. dev. (%)	20%MLM: mean rel. freq. (%)	20%MLM: std. dev. (%)	30%MLM: mean rel. freq. (%)	30%MLM: std. dev. (%)
Neocallimastigomycota	0.597744	99.7122	0.0807652	99.6897	0.0997071	99.6494	0.111626
Basidiomycota	0.542279	0.255807	0.0814907	0.268561	0.0849735	0.31283	0.0949565
Fungi	0.701954	0.0319759	0.00765526	0.0417662	0.0169174	0.0377243	0.0249656
Rumen Liquid Fraction
Phylum	p-values	MS: mean rel. freq. (%)	MS: std. dev. (%)	20%MLM: mean rel. freq. (%)	20%MLM: std. dev. (%)	30%MLM: mean rel. freq. (%)	30%MLM: std. dev. (%)
Neocallimastigomycota	0.807267	99.6828	0.114288	99.7193	0.0955325	99.6867	0.129826
Basidiomycota	0.812803	0.284345	0.0972324	0.251724	0.0824259	0.275338	0.110571
Fungi	0.708279	0.0328653	0.0185131	0.0289701	0.016681	0.0379776	0.0245193

## Sheet: 6B
Supplementry Table 6B : Groupwise and samplewise mean relative abundance (%) of anaerobic fungus genera present in rumen solid fraction.
Genus	p-values	MS: mean rel. freq. (%)	MS: std. dev. (%)	20%MLM: mean rel. freq. (%)	20%MLM: std. dev. (%)	30%MLM: mean rel. freq. (%)	30%MLM: std. dev. (%)	G21S	G21S: parent seq. count	G21S: rel. freq. (%)	G22S	G22S: parent seq. count	G22S: rel. freq. (%)	G23S	G23S: parent seq. count	G23S: rel. freq. (%)	G24S	G24S: parent seq. count	G24S: rel. freq. (%)	G25S	G25S: parent seq. count	G25S: rel. freq. (%)	G26S	G26S: parent seq. count	G26S: rel. freq. (%)	G27S	G27S: parent seq. count	G27S: rel. freq. (%)	G28S	G28S: parent seq. count	G28S: rel. freq. (%)	G310S	G310S: parent seq. count	G310S: rel. freq. (%)	G31S	G31S: parent seq. count	G31S: rel. freq. (%)	G32S	G32S: parent seq. count	G32S: rel. freq. (%)	G33S	G33S: parent seq. count	G33S: rel. freq. (%)	G35S	G35S: parent seq. count	G35S: rel. freq. (%)	G37S	G37S: parent seq. count	G37S: rel. freq. (%)
Neocallimastix	0.142692	44.9972	31.2473	19.5648	11.0212	38.96	22.3954	3160	55667	5.67661	8272	55667	14.8598	11325	55667	20.3442	8470	55667	15.2155	13099	55667	23.531	5994	55667	10.7676	24988	55667	44.8884	11821	55667	21.2352	21100	55667	37.904	18494	55667	33.2226	3479	55667	6.24966	12860	55667	23.1017	31598	55667	56.7625	18892	55667	33.9375
Pecoramyces	0.140735	26.2536	29.7131	45.366	17.6662	20.5066	19.986	32099	55667	57.6625	37660	55667	67.6523	15105	55667	27.1346	29113	55667	52.2985	28642	55667	51.4524	22181	55667	39.8459	5463	55667	9.81371	31768	55667	57.0679	30867	55667	55.4494	364	55667	0.653888	151	55667	0.271256	6087	55667	10.9347	16380	55667	29.425	22538	55667	40.4872
Caecomyces	0.24812	9.19072	9.18843	3.93119	3.55872	19.7696	26.2621	1085	55667	1.94909	309	55667	0.555086	5310	55667	9.53887	1057	55667	1.89879	929	55667	1.66885	1617	55667	2.90477	5805	55667	10.4281	1395	55667	2.50597	690	55667	1.23951	24667	55667	44.3117	40541	55667	72.8277	9503	55667	17.0712	354	55667	0.635924	864	55667	1.55209
Piromyces	0.545204	7.40618	7.66183	11.7033	7.22808	14.0578	12.2143	2667	55667	4.79099	1615	55667	2.90118	13454	55667	24.1687	4027	55667	7.23409	6832	55667	12.273	10803	55667	19.4065	9346	55667	16.7891	3375	55667	6.06284	752	55667	1.35089	7678	55667	13.7927	9572	55667	17.1951	23230	55667	41.7303	4493	55667	8.07121	4111	55667	7.38499
Capellomyces	0.00236568	4.70081	1.78489	11.7217	5.98713	2.53856	2.00105	11238	55667	20.1879	5415	55667	9.72749	6767	55667	12.1562	8878	55667	15.9484	977	55667	1.75508	8389	55667	15.07	8616	55667	15.4778	1921	55667	3.45088	485	55667	0.871252	2801	55667	5.03171	119	55667	0.213771	1932	55667	3.47064	727	55667	1.30598	3135	55667	5.6317
Neocallimastigaceae_gen_Incertae_sedis	0.176711	2.59148	4.44776	0.186601	0.18975	0.100085	0.0876572	40	55667	0.0718559	52	55667	0.0934126	114	55667	0.204789	45	55667	0.0808378	242	55667	0.434728	11	55667	0.0197604	15	55667	0.0269459	312	55667	0.560476	3	55667	0.00538919	33	55667	0.0592811	26	55667	0.0467063	36	55667	0.0646703	91	55667	0.163472	159	55667	0.285627
Neocallimastigaceae	0.0745357	1.93723	1.18373	4.14114	1.72395	2.33455	1.80326	3071	55667	5.51673	826	55667	1.48382	2084	55667	3.74369	2194	55667	3.94129	3109	55667	5.585	3482	55667	6.25505	822	55667	1.47664	2854	55667	5.12692	559	55667	1.00419	997	55667	1.79101	1192	55667	2.1413	1209	55667	2.17184	1185	55667	2.12873	3630	55667	6.52092
Orpinomyces	0.127853	1.28191	1.4054	0.656358	0.482927	0.215568	0.230741	318	55667	0.571254	162	55667	0.291016	317	55667	0.569458	483	55667	0.867659	771	55667	1.38502	11	55667	0.0197604	99	55667	0.177843	762	55667	1.36885	7	55667	0.0125748	55	55667	0.0988018	9	55667	0.0161676	134	55667	0.240717	339	55667	0.608978	283	55667	0.50838
Joblinomyces	0.192009	0.569098	0.994114	1.50022	0.941245	0.645163	0.899584	1534	55667	2.75567	853	55667	1.53233	521	55667	0.935923	987	55667	1.77304	518	55667	0.930533	1691	55667	3.03771	10	55667	0.017964	567	55667	1.01856	784	55667	1.40837	3	55667	0.00538919	7	55667	0.0125748	24	55667	0.0431135	198	55667	0.355686	1413	55667	2.53831
Gyroporus	0.542279	0.255807	0.0814907	0.268561	0.0849735	0.31283	0.0949565	102	55667	0.183232	186	55667	0.33413	180	55667	0.323351	62	55667	0.111377	137	55667	0.246106	153	55667	0.274849	152	55667	0.273052	224	55667	0.402393	209	55667	0.375447	137	55667	0.246106	210	55667	0.377243	254	55667	0.456285	111	55667	0.1994	194	55667	0.348501
Feramyces	0.551797	0.239639	0.368041	0.336151	0.516001	0.101368	0.0772591	67	55667	0.120359	154	55667	0.276645	42	55667	0.0754487	80	55667	0.143712	38	55667	0.0682631	936	55667	1.68143	19	55667	0.0341315	161	55667	0.28922	118	55667	0.211975	111	55667	0.1994	7	55667	0.0125748	15	55667	0.0269459	37	55667	0.0664667	82	55667	0.147305
Ghazallomyces	0.218725	0.213771	0.244856	0.128218	0.111148	0.0479894	0.0444685	50	55667	0.0898198	15	55667	0.0269459	63	55667	0.113173	73	55667	0.131137	165	55667	0.296405	7	55667	0.0125748	20	55667	0.0359279	178	55667	0.319759	14	55667	0.0251495	5	55667	0.00898198	10	55667	0.017964	32	55667	0.0574847	64	55667	0.114969	62	55667	0.111377
Anaeromyces	0.0578529	0.165987	0.152114	0.194909	0.0533956	0.0700595	0.0473533	134	55667	0.240717	74	55667	0.132933	135	55667	0.242514	88	55667	0.158083	54	55667	0.0970054	124	55667	0.222753	132	55667	0.237124	127	55667	0.228142	8	55667	0.0143712	67	55667	0.120359	21	55667	0.0377243	40	55667	0.0718559	32	55667	0.0574847	87	55667	0.156286
Caecomyce	0.268542	0.07976	0.0570293	0.0877989	0.0531339	0.172197	0.156089	11	55667	0.0197604	8	55667	0.0143712	97	55667	0.17425	35	55667	0.0628739	41	55667	0.0736523	63	55667	0.113173	82	55667	0.147305	54	55667	0.0970054	3	55667	0.00538919	199	55667	0.357483	229	55667	0.411375	147	55667	0.26407	28	55667	0.0502991	50	55667	0.0898198
Cyllamyces	0.321847	0.0341315	0.034889	0.0833079	0.062384	0.0846873	0.063319	28	55667	0.0502991	8	55667	0.0143712	76	55667	0.136526	32	55667	0.0574847	40	55667	0.0718559	118	55667	0.211975	9	55667	0.0161676	60	55667	0.107784	5	55667	0.00898198	20	55667	0.0359279	47	55667	0.0844306	105	55667	0.188622	11	55667	0.0197604	85	55667	0.152694
Aklioshbomyces	0.75261	0.0251495	0.0167749	0.0327842	0.0119075	0.0295122	0.0198153	10	55667	0.017964	10	55667	0.017964	21	55667	0.0377243	18	55667	0.0323351	15	55667	0.0269459	32	55667	0.0574847	21	55667	0.0377243	19	55667	0.0341315	4	55667	0.00718559	19	55667	0.0341315	32	55667	0.0574847	21	55667	0.0377243	7	55667	0.0125748	29	55667	0.0520955
Oontomyces	0.00485291	0.0143712	0.0144607	0.0395207	0.0194517	0.00923861	0.00733974	31	55667	0.0556883	8	55667	0.0143712	25	55667	0.0449099	7	55667	0.0125748	19	55667	0.0341315	34	55667	0.0610775	37	55667	0.0664667	15	55667	0.0269459	7	55667	0.0125748	7	55667	0.0125748	0	55667	0	9	55667	0.0161676	1	55667	0.0017964	11	55667	0.0197604
Aestipascuomyces	0.185065	0.00682631	0.00837976	0.00606284	0.00369655	0.00153977	0.00202069	7	55667	0.0125748	0	55667	0	4	55667	0.00718559	1	55667	0.0017964	3	55667	0.00538919	3	55667	0.00538919	4	55667	0.00718559	5	55667	0.00898198	2	55667	0.00359279	0	55667	0	0	55667	0	1	55667	0.0017964	0	55667	0	3	55667	0.00538919
Agriosomyces	0.526176	0.00359279	0.00393571	0.00673649	0.00744747	0.00333616	0.00454746	0	55667	0	2	55667	0.00359279	4	55667	0.00718559	3	55667	0.00538919	10	55667	0.017964	0	55667	0	0	55667	0	11	55667	0.0197604	0	55667	0	0	55667	0	0	55667	0	4	55667	0.00718559	2	55667	0.00359279	7	55667	0.0125748
Tahromyces	0.347837	0.000718559	0.00143712	0.00291914	0.0032307	0.00153977	0.00202069	1	55667	0.0017964	0	55667	0	2	55667	0.00359279	2	55667	0.00359279	6	55667	0.0107784	1	55667	0.0017964	1	55667	0.0017964	0	55667	0	0	55667	0	2	55667	0.00359279	0	55667	0	0	55667	0	1	55667	0.0017964	3	55667	0.00538919
[truncated: 18 more columns]

## Sheet: 6C
Supplementry Table 6C : Groupwise and samplewise mean relative abundance (%) of anaerobic fungus genera present in rumen liquid fraction.
Genus	p-values	MS: mean rel. freq. (%)	MS: std. dev. (%)	20%MLM: mean rel. freq. (%)	20%MLM: std. dev. (%)	30%MLM: mean rel. freq. (%)	30%MLM: std. dev. (%)	G21L	G21L: parent seq. count	G21L: rel. freq. (%)	G22L	G22L: parent seq. count	G22L: rel. freq. (%)	G23L	G23L: parent seq. count	G23L: rel. freq. (%)	G24L	G24L: parent seq. count	G24L: rel. freq. (%)	G25L	G25L: parent seq. count	G25L: rel. freq. (%)	G26L	G26L: parent seq. count	G26L: rel. freq. (%)	G27L	G27L: parent seq. count	G27L: rel. freq. (%)	G28L	G28L: parent seq. count	G28L: rel. freq. (%)	G310L	G310L: parent seq. count	G310L: rel. freq. (%)	G31L	G31L: parent seq. count	G31L: rel. freq. (%)	G32L	G32L: parent seq. count	G32L: rel. freq. (%)	G34L	G34L: parent seq. count	G34L: rel. freq. (%)	G35L	G35L: parent seq. count	G35L: rel. freq. (%)	G37L	G37L: parent seq. count	G37L: rel. freq. (%)
Neocallimastix	0.0587062	41.7827	26.4009	15.1993	12.4031	32.3375	17.9111	2189	51346	4.26323	8734	51346	17.0101	13424	51346	26.1442	3120	51346	6.07642	7152	51346	13.929	2156	51346	4.19896	21653	51346	42.1708	4006	51346	7.80197	13083	51346	25.4801	16871	51346	32.8575	9724	51346	18.9382	10691	51346	20.8215	12320	51346	23.9941	10400	51346	20.2547
Pecoramyces	0.0919702	24.0479	20.7477	48.9724	16.0224	31.4452	24.4369	30732	51346	59.8528	29526	51346	57.504	23105	51346	44.9986	27330	51346	53.2271	30246	51346	58.9062	24660	51346	48.0271	4602	51346	8.96272	30962	51346	60.3007	32479	51346	63.2552	557	51346	1.0848	359	51346	0.699178	15150	51346	29.5057	32123	51346	62.5618	25130	51346	48.9425
Piromyces	0.438962	14.9359	9.94301	9.50488	3.39084	11.988	8.41926	1725	51346	3.35956	3836	51346	7.47088	3624	51346	7.058	4986	51346	9.71059	4818	51346	9.3834	5943	51346	11.5744	7769	51346	15.1307	6342	51346	12.3515	1023	51346	1.99237	9430	51346	18.3656	8410	51346	16.3791	14780	51346	28.7851	1133	51346	2.2066	3894	51346	7.58384
Capellomyces	0.0331219	5.53378	8.72935	12.7507	5.29647	4.21187	2.43829	8315	51346	16.1941	6050	51346	11.7828	7292	51346	14.2017	8338	51346	16.2389	2180	51346	4.24571	8054	51346	15.6857	9962	51346	19.4017	2185	51346	4.25544	943	51346	1.83656	4673	51346	9.101	1513	51346	2.94668	2169	51346	4.22428	1187	51346	2.31177	3548	51346	6.90998
Joblinomyces	0.727438	3.0499	6.67337	2.59222	1.40575	1.38521	1.24904	1996	51346	3.88735	734	51346	1.42952	591	51346	1.15101	1765	51346	3.43746	1600	51346	3.11611	2034	51346	3.96136	16	51346	0.0311611	1912	51346	3.72376	1290	51346	2.51237	19	51346	0.0370039	24	51346	0.0467417	337	51346	0.656332	881	51346	1.71581	1850	51346	3.60301
Caecomyces	0.131182	2.73829	1.74378	2.83079	3.34963	14.2701	19.9457	546	51346	1.06337	574	51346	1.11791	468	51346	0.911463	929	51346	1.80929	805	51346	1.56779	1149	51346	2.23776	5953	51346	11.5939	1204	51346	2.34488	1119	51346	2.17933	18063	51346	35.179	30021	51346	58.468	6006	51346	11.6971	566	51346	1.10233	1631	51346	3.17649
Feramyces	0.0652293	2.2974	3.00543	0.410694	0.460602	0.149233	0.0949625	83	51346	0.161648	168	51346	0.327192	56	51346	0.109064	113	51346	0.220076	41	51346	0.0798504	666	51346	1.29708	6	51346	0.0116854	554	51346	1.07895	139	51346	0.270712	156	51346	0.303821	40	51346	0.0779029	32	51346	0.0623223	48	51346	0.0934834	63	51346	0.122697
Neocallimastigaceae	0.012004	2.25383	1.06961	6.29041	3.37402	3.12463	2.16846	5263	51346	10.2501	1158	51346	2.25529	1857	51346	3.61664	3834	51346	7.46699	3658	51346	7.12422	5834	51346	11.3621	722	51346	1.40615	3513	51346	6.84182	733	51346	1.42757	1151	51346	2.24165	967	51346	1.8833	1524	51346	2.9681	2074	51346	4.03926	4142	51346	8.06684
Neocallimastigaceae_gen_Incertae_sedis	0.20729	1.85847	3.50717	0.142416	0.0896594	0.118558	0.0725744	19	51346	0.0370039	17	51346	0.0331087	112	51346	0.218128	120	51346	0.233709	120	51346	0.233709	115	51346	0.223971	65	51346	0.126592	17	51346	0.0331087	39	51346	0.0759553	5	51346	0.00973786	34	51346	0.0662174	26	51346	0.0506369	75	51346	0.146068	98	51346	0.190862
Orpinomyces	0.280301	0.735208	0.635232	0.527062	0.261876	0.330844	0.403681	156	51346	0.303821	169	51346	0.32914	417	51346	0.812137	365	51346	0.710864	479	51346	0.932887	137	51346	0.266817	110	51346	0.214233	332	51346	0.646594	47	51346	0.0915359	11	51346	0.0214233	42	51346	0.081798	290	51346	0.564796	658	51346	1.2815	221	51346	0.430413
Gyroporus	0.812803	0.284345	0.0972324	0.251724	0.0824259	0.275338	0.110571	110	51346	0.214233	232	51346	0.451837	131	51346	0.255132	145	51346	0.282398	86	51346	0.167491	112	51346	0.218128	100	51346	0.194757	118	51346	0.229813	273	51346	0.531687	171	51346	0.333035	96	51346	0.186967	106	51346	0.206443	85	51346	0.165544	157	51346	0.305769
Anaeromyces	0.0911131	0.159701	0.0947979	0.25927	0.184337	0.108821	0.0522991	110	51346	0.214233	68	51346	0.132435	103	51346	0.2006	168	51346	0.327192	41	51346	0.0798504	259	51346	0.504421	298	51346	0.580376	18	51346	0.0350563	38	51346	0.0740077	108	51346	0.210338	39	51346	0.0759553	36	51346	0.0701126	32	51346	0.0623223	76	51346	0.148015
Ghazallomyces	0.144259	0.15824	0.123631	0.0937269	0.0479577	0.0688953	0.0584996	33	51346	0.0642699	17	51346	0.0331087	90	51346	0.175281	50	51346	0.0973786	80	51346	0.155806	52	51346	0.101274	19	51346	0.0370039	44	51346	0.0856931	48	51346	0.0934834	12	51346	0.0233709	2	51346	0.00389514	26	51346	0.0506369	104	51346	0.202547	49	51346	0.095431
Cyllamyces	0.846351	0.0791201	0.100106	0.0752249	0.0704966	0.0985958	0.0677389	24	51346	0.0467417	5	51346	0.00973786	28	51346	0.054532	32	51346	0.0623223	12	51346	0.0233709	108	51346	0.210338	10	51346	0.0194757	90	51346	0.175281	23	51346	0.0447941	66	51346	0.12854	31	51346	0.0603747	131	51346	0.255132	22	51346	0.0428466	44	51346	0.0856931
Aklioshbomyces	0.917323	0.0304308	0.0204249	0.0340825	0.0212678	0.0345694	0.0192492	10	51346	0.0194757	14	51346	0.027266	8	51346	0.0155806	21	51346	0.040899	9	51346	0.0175281	33	51346	0.0642699	8	51346	0.0155806	37	51346	0.0720601	13	51346	0.0253184	26	51346	0.0506369	29	51346	0.0564796	29	51346	0.0564796	10	51346	0.0194757	25	51346	0.0486893
Oontomyces	0.00460556	0.0111985	0.00962768	0.0284832	0.0149259	0.00900752	0.00495938	19	51346	0.0370039	10	51346	0.0194757	25	51346	0.0486893	7	51346	0.013633	4	51346	0.00779029	18	51346	0.0350563	25	51346	0.0486893	9	51346	0.0175281	7	51346	0.013633	5	51346	0.00973786	0	51346	0	7	51346	0.013633	2	51346	0.00389514	4	51346	0.00779029
Tahromyces	0.45196	0.00608616	0.00587811	0.00413859	0.00663587	0.00243446	0.00252997	0	51346	0	0	51346	0	0	51346	0	10	51346	0.0194757	2	51346	0.00389514	0	51346	0	5	51346	0.00973786	0	51346	0	0	51346	0	0	51346	0	2	51346	0.00389514	1	51346	0.00194757	0	51346	0	1	51346	0.00194757
Agriosomyces	0.714044	0.00462548	0.0044558	0.00340825	0.00347711	0.0031648	0.00237282	0	51346	0	0	51346	0	0	51346	0	3	51346	0.00584271	4	51346	0.00779029	3	51346	0.00584271	4	51346	0.00779029	0	51346	0	2	51346	0.00389514	0	51346	0	3	51346	0.00584271	1	51346	0.00194757	0	51346	0	3	51346	0.00584271
[truncated: 30 more columns]

## Sheet: 6D
Supplementry Table 6D : Groupwise mean relative abundance (%) of anaerobic fungal genera present at above one percent mean relative frequency in rumen solid and liquid fractions.
Rumen Solid Fraction
Genus	p-values	MS: mean rel. freq. (%)	MS: std. dev. (%)	20%MLM: mean rel. freq. (%)	20%MLM: std. dev. (%)	30%MLM: mean rel. freq. (%)	30%MLM: std. dev. (%)
Neocallimastix	0.142692	44.9972	31.2473	19.5648	11.0212	38.96	22.3954
Pecoramyces	0.140735	26.2536	29.7131	45.366	17.6662	20.5066	19.986
Caecomyces	0.24812	9.19072	9.18843	3.93119	3.55872	19.7696	26.2621
Piromyces	0.545204	7.40618	7.66183	11.7033	7.22808	14.0578	12.2143
Capellomyces	0.00236568	4.70081	1.78489	11.7217	5.98713	2.53856	2.00105
Neocallimastigaceae_gen_Incertae_sedis	0.176711	2.59148	4.44776	0.186601	0.18975	0.100085	0.0876572
Neocallimastigaceae	0.0745357	1.93723	1.18373	4.14114	1.72395	2.33455	1.80326
Orpinomyces	0.127853	1.28191	1.4054	0.656358	0.482927	0.215568	0.230741
others		1.64		2.73		1.52
Rumen Liquid Fraction
Genus	p-values	MS: mean rel. freq. (%)	MS: std. dev. (%)	20%MLM: mean rel. freq. (%)	20%MLM: std. dev. (%)	30%MLM: mean rel. freq. (%)	30%MLM: std. dev. (%)
Neocallimastix	0.0587062	41.7827	26.4009	15.1993	12.4031	32.3375	17.9111
Pecoramyces	0.0919702	24.0479	20.7477	48.9724	16.0224	31.4452	24.4369
Piromyces	0.438962	14.9359	9.94301	9.50488	3.39084	11.988	8.41926
Capellomyces	0.0331219	5.53378	8.72935	12.7507	5.29647	4.21187	2.43829
Joblinomyces	0.727438	3.0499	6.67337	2.59222	1.40575	1.38521	1.24904
Caecomyces	0.131182	2.73829	1.74378	2.83079	3.34963	14.2701	19.9457
Feramyces	0.0652293	2.2974	3.00543	0.410694	0.460602	0.149233	0.0949625
Neocallimastigaceae	0.012004	2.25383	1.06961	6.29041	3.37402	3.12463	2.16846
Neocallimastigaceae_gen_Incertae_sedis	0.20729	1.85847	3.50717	0.142416	0.0896594	0.118558	0.0725744
others		1.5		1.31		0.97

## Sheet: 6E
Supplementry Table 6E : Groupwise and samplewise mean relative abundance (%) of anaerobic fugal species present in rumen solid fraction.
Species	p-values	MS: mean rel. freq. (%)	MS: std. dev. (%)	20%MLM: mean rel. freq. (%)	20%MLM: std. dev. (%)	30%MLM: mean rel. freq. (%)	30%MLM: std. dev. (%)	G21S	G21S: parent seq. count	G21S: rel. freq. (%)	G22S	G22S: parent seq. count	G22S: rel. freq. (%)	G23S	G23S: parent seq. count	G23S: rel. freq. (%)	G24S	G24S: parent seq. count	G24S: rel. freq. (%)	G25S	G25S: parent seq. count	G25S: rel. freq. (%)	G26S	G26S: parent seq. count	G26S: rel. freq. (%)	G27S	G27S: parent seq. count	G27S: rel. freq. (%)	G28S	G28S: parent seq. count	G28S: rel. freq. (%)	G310S	G310S: parent seq. count	G310S: rel. freq. (%)	G31S	G31S: parent seq. count	G31S: rel. freq. (%)	G32S	G32S: parent seq. count	G32S: rel. freq. (%)	G33S	G33S: parent seq. count	G33S: rel. freq. (%)	G35S	G35S: parent seq. count	G35S: rel. freq. (%)	G37S	G37S: parent seq. count	G37S: rel. freq. (%)
Neocallimastix_cameroonii	0.103507	39.1007	28.7179	14.1401	10.9547	32.9764	18.7229	2413	55667	4.3347	7028	55667	12.6251	9724	55667	17.4682	7532	55667	13.5305	368	55667	0.661074	4185	55667	7.51792	21601	55667	38.804	10120	55667	18.1795	18383	55667	33.0232	16227	55667	29.1501	2942	55667	5.285	11223	55667	20.161	26409	55667	47.441	15153	55667	27.2208
Pecoramycesp	0.203407	21.8061	25.844	18.7238	12.892	5.09124	6.77285	10532	55667	18.9196	3081	55667	5.5347	8139	55667	14.6209	15714	55667	28.2286	19834	55667	35.6297	1145	55667	2.05687	4047	55667	7.27002	20892	55667	37.5303	765	55667	1.37424	213	55667	0.382632	50	55667	0.0898198	4510	55667	8.10175	11249	55667	20.2077	2860	55667	5.13769
Caecomycecommunis	0.248405	8.90617	9.0449	3.64377	3.48451	19.2879	25.949	971	55667	1.7443	288	55667	0.517362	5052	55667	9.07539	982	55667	1.76406	699	55667	1.25568	1377	55667	2.47364	5620	55667	10.0957	1238	55667	2.22394	666	55667	1.1964	24165	55667	43.4099	39998	55667	71.8523	9098	55667	16.3436	232	55667	0.416764	634	55667	1.13892
Piromycesp	0.560283	6.52236	7.64188	9.93609	7.4726	13.0901	12.2877	2073	55667	3.72393	1527	55667	2.7431	13016	55667	23.3819	3914	55667	7.0311	1620	55667	2.91016	9771	55667	17.5526	9141	55667	16.4209	3187	55667	5.72512	528	55667	0.948497	7229	55667	12.9861	9449	55667	16.9741	22691	55667	40.762	2826	55667	5.07662	3828	55667	6.87661
Capellomyceforaminis	0.00173852	4.24453	1.56096	11.3671	5.81768	2.29451	1.75485	11041	55667	19.834	5338	55667	9.58916	6654	55667	11.9532	8361	55667	15.0197	929	55667	1.66885	8205	55667	14.7394	8250	55667	14.8203	1844	55667	3.31256	463	55667	0.831732	2389	55667	4.29159	94	55667	0.168861	1883	55667	3.38261	664	55667	1.19281	2782	55667	4.99757
Pecoramyceruminantium	0.0960477	4.13818	3.70379	25.9045	16.8902	14.5855	18.3887	21270	55667	38.2094	32812	55667	58.9434	6801	55667	12.2173	13158	55667	23.637	8580	55667	15.4131	20882	55667	37.5124	1328	55667	2.38561	10531	55667	18.9179	28304	55667	50.8452	107	55667	0.192214	63	55667	0.113173	1472	55667	2.6443	4909	55667	8.81851	18927	55667	34.0004
Neocallimastix_californiae	0.164394	2.99028	1.98171	1.44296	0.963265	3.43317	2.43455	290	55667	0.520955	831	55667	1.49281	836	55667	1.50179	562	55667	1.00957	227	55667	0.407782	534	55667	0.959276	2013	55667	3.61615	1133	55667	2.03532	1758	55667	3.15806	1377	55667	2.47364	286	55667	0.513769	804	55667	1.4443	1765	55667	3.17064	2621	55667	4.70836
Neocallimastigaceae_sp	0.176711	2.59148	4.44776	0.186601	0.18975	0.100085	0.0876572	40	55667	0.0718559	52	55667	0.0934126	114	55667	0.204789	45	55667	0.0808378	242	55667	0.434728	11	55667	0.0197604	15	55667	0.0269459	312	55667	0.560476	3	55667	0.00538919	33	55667	0.0592811	26	55667	0.0467063	36	55667	0.0646703	91	55667	0.163472	159	55667	0.285627
Neocallimastix	0.105208	1.96131	1.16278	0.764591	0.605038	1.61445	1.00819	210	55667	0.377243	302	55667	0.542512	477	55667	0.856881	260	55667	0.467063	105	55667	0.188622	319	55667	0.57305	1262	55667	2.26705	470	55667	0.844306	795	55667	1.42814	729	55667	1.30957	173	55667	0.310777	565	55667	1.01496	1032	55667	1.85388	870	55667	1.56286
Neocallimastigaceae	0.0745357	1.93723	1.18373	4.14114	1.72395	2.33455	1.80326	3071	55667	5.51673	826	55667	1.48382	2084	55667	3.74369	2194	55667	3.94129	3109	55667	5.585	3482	55667	6.25505	822	55667	1.47664	2854	55667	5.12692	559	55667	1.00419	997	55667	1.79101	1192	55667	2.1413	1209	55667	2.17184	1185	55667	2.12873	3630	55667	6.52092
Orpinomycesp	0.127853	1.28191	1.4054	0.656358	0.482927	0.215568	0.230741	318	55667	0.571254	162	55667	0.291016	317	55667	0.569458	483	55667	0.867659	771	55667	1.38502	11	55667	0.0197604	99	55667	0.177843	762	55667	1.36885	7	55667	0.0125748	55	55667	0.0988018	9	55667	0.0161676	134	55667	0.240717	339	55667	0.608978	283	55667	0.50838
Piromyceirregularis	0.705272	0.860115	0.694615	1.70613	2.89089	0.929763	0.871242	570	55667	1.02395	84	55667	0.150897	377	55667	0.677241	102	55667	0.183232	5142	55667	9.23707	974	55667	1.74969	180	55667	0.323351	169	55667	0.303591	223	55667	0.400596	427	55667	0.767061	65	55667	0.116766	529	55667	0.950294	1646	55667	2.95687	249	55667	0.447303
Neocallimastix_frontalis	0.573194	0.688738	0.566739	1.38974	2.54394	0.434471	0.287443	214	55667	0.384429	105	55667	0.188622	252	55667	0.452692	88	55667	0.158083	4460	55667	8.01193	892	55667	1.60239	101	55667	0.181436	77	55667	0.138323	132	55667	0.237124	145	55667	0.260477	61	55667	0.10958	251	55667	0.450896	585	55667	1.05089	202	55667	0.362872
Joblinomyceapicalis	0.192009	0.569098	0.994114	1.50022	0.941245	0.645163	0.899584	1534	55667	2.75567	853	55667	1.53233	521	55667	0.935923	987	55667	1.77304	518	55667	0.930533	1691	55667	3.03771	10	55667	0.017964	567	55667	1.01856	784	55667	1.40837	3	55667	0.00538919	7	55667	0.0125748	24	55667	0.0431135	198	55667	0.355686	1413	55667	2.53831
Capellomyces	0.472098	0.456285	0.235984	0.354564	0.27625	0.244053	0.282702	197	55667	0.35389	77	55667	0.138323	113	55667	0.202993	517	55667	0.928737	48	55667	0.086227	184	55667	0.330537	366	55667	0.657481	77	55667	0.138323	22	55667	0.0395207	412	55667	0.740115	25	55667	0.0449099	49	55667	0.0880234	63	55667	0.113173	353	55667	0.634128
Pecoramyces	0.623701	0.309339	0.256193	0.737645	0.931135	0.829935	1.06115	297	55667	0.53353	1767	55667	3.17423	165	55667	0.296405	241	55667	0.432932	228	55667	0.409578	154	55667	0.276645	88	55667	0.158083	345	55667	0.619757	1798	55667	3.22992	44	55667	0.0790414	38	55667	0.0682631	105	55667	0.188622	222	55667	0.3988	751	55667	1.34909
Caecomycechurrovis	0.307997	0.277723	0.161334	0.278666	0.135501	0.472196	0.353361	111	55667	0.1994	21	55667	0.0377243	250	55667	0.449099	74	55667	0.132933	216	55667	0.388022	229	55667	0.411375	184	55667	0.330537	156	55667	0.280238	24	55667	0.0431135	493	55667	0.885623	533	55667	0.957479	403	55667	0.723948	118	55667	0.211975	219	55667	0.393411
Neocallimastix_sp	0.641665	0.256166	0.309635	1.82738	4.69978	0.501451	1.12064	33	55667	0.0592811	6	55667	0.0107784	36	55667	0.0646703	28	55667	0.0502991	7939	55667	14.2616	64	55667	0.114969	11	55667	0.0197604	21	55667	0.0377243	32	55667	0.0574847	16	55667	0.0287423	17	55667	0.0305387	17	55667	0.0305387	1807	55667	3.24609	46	55667	0.0826342
Gyroporus	0.542279	0.255807	0.0814907	0.268561	0.0849735	0.31283	0.0949565	102	55667	0.183232	186	55667	0.33413	180	55667	0.323351	62	55667	0.111377	137	55667	0.246106	153	55667	0.274849	152	55667	0.273052	224	55667	0.402393	209	55667	0.375447	137	55667	0.246106	210	55667	0.377243	254	55667	0.456285	111	55667	0.1994	194	55667	0.348501
Ghazallomyceconstrictus	0.218725	0.213771	0.244856	0.128218	0.111148	0.0479894	0.0444685	50	55667	0.0898198	15	55667	0.0269459	63	55667	0.113173	73	55667	0.131137	165	55667	0.296405	7	55667	0.0125748	20	55667	0.0359279	178	55667	0.319759	14	55667	0.0251496	5	55667	0.00898198	10	55667	0.017964	32	55667	0.0574847	64	55667	0.114969	62	55667	0.111377
Feramyceaustinii	0.603292	0.198322	0.373334	0.242963	0.514452	0.0336183	0.0644755	11	55667	0.0197604	38	55667	0.0682631	9	55667	0.0161676	51	55667	0.0916162	1	55667	0.0017964	890	55667	1.59879	4	55667	0.00718559	78	55667	0.140119	1	55667	0.0017964	106	55667	0.190418	4	55667	0.00718559	2	55667	0.00359279	0	55667	0	4	55667	0.00718559
Caecomyce	0.268542	0.07976	0.0570293	0.0877989	0.0531339	0.172197	0.156089	11	55667	0.0197604	8	55667	0.0143712	97	55667	0.17425	35	55667	0.0628739	41	55667	0.0736523	63	55667	0.113173	82	55667	0.147305	54	55667	0.0970054	3	55667	0.00538919	199	55667	0.357483	229	55667	0.411375	147	55667	0.26407	28	55667	0.0502991	50	55667	0.0898198
Anaeromycesp	0.33868	0.0661074	0.0967549	0.0282932	0.039559	0.0141145	0.00995241	5	55667	0.00898198	12	55667	0.0215568	17	55667	0.0305387	2	55667	0.00359279	19	55667	0.0341315	0	55667	0	0	55667	0	71	55667	0.127544	2	55667	0.00359279	6	55667	0.0107784	13	55667	0.0233532	4	55667	0.00718559	15	55667	0.0269459	14	55667	0.0251496
Anaeromycerobustus	0.0040921	0.0549697	0.0177689	0.144834	0.0732014	0.0384942	0.0351346	106	55667	0.190418	56	55667	0.100598	102	55667	0.183232	83	55667	0.149101	13	55667	0.0233532	123	55667	0.220957	132	55667	0.237124	30	55667	0.0538919	6	55667	0.0107784	45	55667	0.0808378	2	55667	0.00359279	27	55667	0.0485027	0	55667	0	53	55667	0.095209
Feramyces	0.354371	0.0413171	0.025252	0.0931881	0.0553427	0.0677498	0.0728417	56	55667	0.100598	116	55667	0.208382	33	55667	0.0592811	29	55667	0.0520955	37	55667	0.0664667	46	55667	0.0826342	15	55667	0.0269459	83	55667	0.149101	117	55667	0.210178	5	55667	0.00898198	3	55667	0.00538919	13	55667	0.0233532	37	55667	0.0664667	78	55667	0.140119
Cyllamyceaberensis	0.321847	0.0341315	0.034889	0.0833079	0.062384	0.0846873	0.063319	28	55667	0.0502991	8	55667	0.0143712	76	55667	0.136526	32	55667	0.0574847	40	55667	0.0718559	118	55667	0.211975	9	55667	0.0161676	60	55667	0.107784	5	55667	0.00898198	20	55667	0.0359279	47	55667	0.0844306	105	55667	0.188622	11	55667	0.0197604	85	55667	0.152694
Aklioshbomycepapillarum	0.75261	0.0251496	0.0167749	0.0327842	0.0119075	0.0295122	0.0198153	10	55667	0.017964	10	55667	0.017964	21	55667	0.0377243	18	55667	0.0323351	15	55667	0.0269459	32	55667	0.0574847	21	55667	0.0377243	19	55667	0.0341315	4	55667	0.00718559	19	55667	0.0341315	32	55667	0.0574847	21	55667	0.0377243	7	55667	0.0125748	29	55667	0.0520955
Piromycefinnis	0.232612	0.0229939	0.0201453	0.0574847	0.0400782	0.035158	0.0308744	23	55667	0.0413171	3	55667	0.00538919	59	55667	0.105987	11	55667	0.0197604	64	55667	0.114969	56	55667	0.100598	21	55667	0.0377243	19	55667	0.0341315	1	55667	0.0017964	21	55667	0.0377243	53	55667	0.095209	9	55667	0.0161676	18	55667	0.0323351	33	55667	0.0592811
Anaeromycecontortus	0.391476	0.0222753	0.0230219	0.013473	0.013078	0.00898198	0.00797614	21	55667	0.0377243	3	55667	0.00538919	10	55667	0.017964	2	55667	0.00359279	16	55667	0.0287423	0	55667	0	0	55667	0	8	55667	0.0143712	0	55667	0	12	55667	0.0215568	4	55667	0.00718559	7	55667	0.0125748	2	55667	0.00359279	10	55667	0.017964
Anaeromycemucronatus	0.234594	0.0197604	0.0235595	0.00628739	0.00615774	0.00692896	0.0078261	2	55667	0.00359279	2	55667	0.00359279	6	55667	0.0107784	1	55667	0.0017964	5	55667	0.00898198	1	55667	0.0017964	0	55667	0	11	55667	0.0197604	0	55667	0	2	55667	0.00359279	2	55667	0.00359279	2	55667	0.00359279	12	55667	0.0215568	9	55667	0.0161676
Oontomyceanksri	0.00485291	0.0143712	0.0144607	0.0395207	0.0194517	0.00923861	0.00733974	31	55667	0.0556883	8	55667	0.0143712	25	55667	0.0449099	7	55667	0.0125748	19	55667	0.0341315	34	55667	0.0610775	37	55667	0.0664667	15	55667	0.0269459	7	55667	0.0125748	7	55667	0.0125748	0	55667	0	9	55667	0.0161676	1	55667	0.0017964	11	55667	0.0197604
Aestipascuomycesp	0.185065	0.00682631	0.00837976	0.00606284	0.00369655	0.00153977	0.00202069	7	55667	0.0125748	0	55667	0	4	55667	0.00718559	1	55667	0.0017964	3	55667	0.00538919	3	55667	0.00538919	4	55667	0.00718559	5	55667	0.00898198	2	55667	0.00359279	0	55667	0	0	55667	0	1	55667	0.0017964	0	55667	0	3	55667	0.00538919
Caecomycesp	0.863327	0.00682631	0.00572597	0.00875743	0.00904631	0.00949524	0.00766455	3	55667	0.00538919	0	55667	0	8	55667	0.0143712	1	55667	0.0017964	14	55667	0.0251496	11	55667	0.0197604	1	55667	0.0017964	1	55667	0.0017964	0	55667	0	9	55667	0.0161676	10	55667	0.017964	2	55667	0.00359279	4	55667	0.00718559	11	55667	0.0197604
Agriosomycelongus	0.526176	0.00359279	0.00393571	0.00673649	0.00744747	0.00333616	0.00454746	0	55667	0	2	55667	0.00359279	4	55667	0.00718559	3	55667	0.00538919	10	55667	0.017964	0	55667	0	0	55667	0	11	55667	0.0197604	0	55667	0	0	55667	0	0	55667	0	4	55667	0.00718559	2	55667	0.00359279	7	55667	0.0125748
Anaeromyces	0.825559	0.00287423	0.00369901	0.00202095	0.00406056	0.00153977	0.00202069	0	55667	0	1	55667	0.0017964	0	55667	0	0	55667	0	1	55667	0.0017964	0	55667	0	0	55667	0	7	55667	0.0125748	0	55667	0	2	55667	0.00359279	0	55667	0	0	55667	0	3	55667	0.00538919	1	55667	0.0017964
Piromyces	0.287756	0.000718559	0.000880051	0.00359279	0.00347871	0.00282291	0.0030147	1	55667	0.0017964	1	55667	0.0017964	2	55667	0.00359279	0	55667	0	6	55667	0.0107784	2	55667	0.00359279	4	55667	0.00718559	0	55667	0	0	55667	0	1	55667	0.0017964	5	55667	0.00898198	1	55667	0.0017964	3	55667	0.00538919	1	55667	0.0017964
Tahromycemunnarensis	0.347837	0.000718559	0.00143712	0.00291914	0.00323071	0.00153977	0.00202069	1	55667	0.0017964	0	55667	0	2	55667	0.00359279	2	55667	0.00359279	6	55667	0.0107784	1	55667	0.0017964	1	55667	0.0017964	0	55667	0	0	55667	0	2	55667	0.00359279	0	55667	0	0	55667	0	1	55667	0.0017964	3	55667	0.00538919
[truncated: 18 more columns]

## Sheet: 6F
Supplementry Table 6F : Groupwise and samplewise mean relative abundance (%) of anaerobic fugal species present in rumen solid fraction.
Speceis	p-values	MS: mean rel. freq. (%)	MS: std. dev. (%)	20%MLM: mean rel. freq. (%)	20%MLM: std. dev. (%)	30%MLM: mean rel. freq. (%)	30%MLM: std. dev. (%)	G21L	G21L: parent seq. count	G21L: rel. freq. (%)	G22L	G22L: parent seq. count	G22L: rel. freq. (%)	G23L	G23L: parent seq. count	G23L: rel. freq. (%)	G24L	G24L: parent seq. count	G24L: rel. freq. (%)	G25L	G25L: parent seq. count	G25L: rel. freq. (%)	G26L	G26L: parent seq. count	G26L: rel. freq. (%)	G27L	G27L: parent seq. count	G27L: rel. freq. (%)	G28L	G28L: parent seq. count	G28L: rel. freq. (%)	G310L	G310L: parent seq. count	G310L: rel. freq. (%)	G31L	G31L: parent seq. count	G31L: rel. freq. (%)	G32L	G32L: parent seq. count	G32L: rel. freq. (%)	G34L	G34L: parent seq. count	G34L: rel. freq. (%)	G35L	G35L: parent seq. count	G35L: rel. freq. (%)	G37L	G37L: parent seq. count	G37L: rel. freq. (%)
Neocallimastix_cameroonii	0.0486869	35.586	23.6221	11.1396	11.3074	26.9534	15.3549	1490	51346	2.90188	7471	51346	14.5503	11546	51346	22.4867	2182	51346	4.2496	300	51346	0.584271	1449	51346	2.82203	17934	51346	34.9277	3386	51346	6.59448	10713	51346	20.8643	14125	51346	27.5094	8353	51346	16.2681	9149	51346	17.8183	10698	51346	20.8351	7604	51346	14.8093
Pecoramycesp	0.362659	17.8821	20.8627	14.6939	7.95489	7.09379	10.3563	5574	51346	10.8558	4281	51346	8.33755	13261	51346	25.8267	10119	51346	19.7075	12238	51346	23.8344	1571	51346	3.05963	3468	51346	6.75418	9846	51346	19.1758	856	51346	1.66712	309	51346	0.6018	164	51346	0.319402	8199	51346	15.9681	16039	51346	31.2371	2508	51346	4.88451
Piromycesp	0.390318	14.1642	9.67534	8.4084	3.74218	11.4617	8.32578	1540	51346	2.99926	3656	51346	7.12032	3566	51346	6.94504	4575	51346	8.91014	1938	51346	3.77439	5661	51346	11.0252	7489	51346	14.5854	6114	51346	11.9075	865	51346	1.68465	9273	51346	18.0598	7949	51346	15.4812	14417	51346	28.0781	1002	51346	1.95147	3499	51346	6.81455
Pecoramyceruminantium	0.00644708	5.8785	3.41068	33.3743	14.7673	23.2564	19.937	24885	51346	48.4653	23040	51346	44.872	9469	51346	18.4416	16991	51346	33.0912	17836	51346	34.7369	22930	51346	44.6578	1067	51346	2.07806	20873	51346	40.6517	29338	51346	57.1378	174	51346	0.338877	129	51346	0.251237	6649	51346	12.9494	15582	51346	30.3471	22236	51346	43.3062
Capellomyceforaminis	0.0214212	5.11724	8.03733	12.3001	5.06722	3.81261	2.05995	8164	51346	15.9	5944	51346	11.5764	7115	51346	13.857	7663	51346	14.9242	2100	51346	4.0899	7851	51346	15.2904	9557	51346	18.6129	2131	51346	4.15027	877	51346	1.70802	3966	51346	7.72407	1275	51346	2.48315	2117	51346	4.12301	1151	51346	2.24165	3197	51346	6.22639
Neocallimastix_californiae	0.0969123	3.67312	2.48374	1.36914	1.4486	3.38074	2.09146	305	51346	0.594009	662	51346	1.28929	1074	51346	2.09169	383	51346	0.74592	96	51346	0.186967	298	51346	0.580376	2524	51346	4.91567	282	51346	0.549215	1600	51346	3.11611	1683	51346	3.27776	711	51346	1.38472	798	51346	1.55416	1043	51346	2.03132	1396	51346	2.71881
Joblinomyceapicalis	0.727438	3.0499	6.67337	2.59222	1.40575	1.38521	1.24904	1996	51346	3.88735	734	51346	1.42952	591	51346	1.15101	1765	51346	3.43746	1600	51346	3.11611	2034	51346	3.96136	16	51346	0.0311611	1912	51346	3.72376	1290	51346	2.51237	19	51346	0.0370039	24	51346	0.0467417	337	51346	0.656332	881	51346	1.71581	1850	51346	3.60301
Caecomycecommunis	0.133827	2.44566	1.75587	2.55473	3.23611	13.6505	19.47	437	51346	0.851089	503	51346	0.979628	416	51346	0.81019	769	51346	1.49768	666	51346	1.29708	971	51346	1.89109	5668	51346	11.0388	1064	51346	2.07222	987	51346	1.92225	17159	51346	33.4184	29364	51346	57.1885	5681	51346	11.0642	517	51346	1.00689	1358	51346	2.6448
Neocallimastigaceae	0.012004	2.25383	1.06961	6.29041	3.37402	3.12463	2.16846	5263	51346	10.2501	1158	51346	2.25529	1857	51346	3.61664	3834	51346	7.46699	3658	51346	7.12422	5834	51346	11.3621	722	51346	1.40615	3513	51346	6.84182	733	51346	1.42757	1151	51346	2.24165	967	51346	1.8833	1524	51346	2.9681	2074	51346	4.03926	4142	51346	8.06684
Feramyceaustinii	0.0599845	2.19929	2.95611	0.304795	0.450423	0.0547754	0.0890971	7	51346	0.013633	86	51346	0.167491	20	51346	0.0389514	31	51346	0.0603747	2	51346	0.00389514	605	51346	1.17828	2	51346	0.00389514	499	51346	0.971838	0	51346	0	145	51346	0.282398	32	51346	0.0623223	10	51346	0.0194757	2	51346	0.00389514	3	51346	0.00584271
Neocallimastigaceae_sp	0.20729	1.85847	3.50717	0.142416	0.0896594	0.118558	0.0725744	19	51346	0.0370039	17	51346	0.0331087	112	51346	0.218128	120	51346	0.233709	120	51346	0.233709	115	51346	0.223971	65	51346	0.126592	17	51346	0.0331087	39	51346	0.0759553	5	51346	0.00973786	34	51346	0.0662174	26	51346	0.0506369	75	51346	0.146068	98	51346	0.190862
Neocallimastix	0.128409	1.62014	1.05677	0.747137	0.588896	1.45338	0.725373	238	51346	0.463522	434	51346	0.845246	737	51346	1.43536	195	51346	0.379776	96	51346	0.186967	169	51346	0.32914	1003	51346	1.95341	197	51346	0.383672	595	51346	1.1588	1010	51346	1.96705	456	51346	0.888093	462	51346	0.899778	456	51346	0.888093	544	51346	1.05948
Orpinomycesp	0.280301	0.735208	0.635232	0.527062	0.261876	0.330844	0.403681	156	51346	0.303821	169	51346	0.32914	417	51346	0.812137	365	51346	0.710864	479	51346	0.932887	137	51346	0.266817	110	51346	0.214233	332	51346	0.646594	47	51346	0.0915359	11	51346	0.0214233	42	51346	0.081798	290	51346	0.564796	658	51346	1.2815	221	51346	0.430413
Piromyceirregularis	0.61557	0.666556	0.637361	1.04292	1.70971	0.488354	0.245888	148	51346	0.288241	171	51346	0.333035	46	51346	0.0895883	385	51346	0.749815	2846	51346	5.54279	224	51346	0.436256	244	51346	0.475207	220	51346	0.428466	156	51346	0.303821	111	51346	0.21618	426	51346	0.829665	352	51346	0.685545	119	51346	0.231761	371	51346	0.722549
Neocallimastix_frontalis	0.580795	0.603991	0.614511	0.98961	1.78764	0.374177	0.26198	104	51346	0.202547	144	51346	0.28045	49	51346	0.095431	323	51346	0.629066	2928	51346	5.70249	221	51346	0.430413	175	51346	0.340825	121	51346	0.235656	147	51346	0.286293	48	51346	0.0934834	147	51346	0.286293	209	51346	0.407042	102	51346	0.198652	430	51346	0.837456
Capellomyces	0.982584	0.416537	0.700117	0.450619	0.381685	0.399252	0.424296	151	51346	0.294083	106	51346	0.206443	177	51346	0.34472	675	51346	1.31461	80	51346	0.155806	203	51346	0.395357	405	51346	0.788766	54	51346	0.105169	66	51346	0.12854	707	51346	1.37693	238	51346	0.463522	52	51346	0.101274	36	51346	0.0701126	351	51346	0.683598
Neocallimastix_sp	0.553163	0.299439	0.515418	0.953823	2.38676	0.175768	0.254201	52	51346	0.101274	23	51346	0.0447941	18	51346	0.0350563	37	51346	0.0720601	3732	51346	7.26834	19	51346	0.0370039	17	51346	0.0331087	20	51346	0.0389514	28	51346	0.054532	5	51346	0.00973786	57	51346	0.111012	73	51346	0.142173	21	51346	0.040899	426	51346	0.829665
Pecoramyces	0.357517	0.287267	0.190063	0.90416	1.29183	1.09502	1.32621	273	51346	0.531687	2205	51346	4.29439	375	51346	0.730339	220	51346	0.428466	172	51346	0.334982	159	51346	0.309664	67	51346	0.130487	243	51346	0.47326	2285	51346	4.4502	74	51346	0.14412	66	51346	0.12854	302	51346	0.588167	502	51346	0.977681	386	51346	0.751763
Gyroporus	0.812803	0.284345	0.0972324	0.251724	0.0824259	0.275338	0.110571	110	51346	0.214233	232	51346	0.451837	131	51346	0.255132	145	51346	0.282398	86	51346	0.167491	112	51346	0.218128	100	51346	0.194757	118	51346	0.229813	273	51346	0.531687	171	51346	0.333035	96	51346	0.186967	106	51346	0.206443	85	51346	0.165544	157	51346	0.305769
Caecomycechurrovis	0.111283	0.217885	0.075983	0.218858	0.105313	0.477885	0.419738	82	51346	0.159701	50	51346	0.0973786	39	51346	0.0759553	131	51346	0.255132	130	51346	0.253184	139	51346	0.270712	221	51346	0.430413	107	51346	0.20839	107	51346	0.20839	691	51346	1.34577	481	51346	0.936782	236	51346	0.459627	42	51346	0.081798	245	51346	0.477155
Ghazallomyceconstrictus	0.144259	0.15824	0.123631	0.0937269	0.0479577	0.0688953	0.0584996	33	51346	0.0642699	17	51346	0.0331087	90	51346	0.175281	50	51346	0.0973786	80	51346	0.155806	52	51346	0.101274	19	51346	0.0370039	44	51346	0.0856931	48	51346	0.0934834	12	51346	0.0233709	2	51346	0.00389514	26	51346	0.0506369	104	51346	0.202547	49	51346	0.095431
Feramyces	0.947171	0.0981089	0.0630479	0.105899	0.0494136	0.0944572	0.0822489	76	51346	0.148015	82	51346	0.159701	36	51346	0.0701126	82	51346	0.159701	39	51346	0.0759553	61	51346	0.118802	4	51346	0.00779029	55	51346	0.107116	139	51346	0.270712	11	51346	0.0214233	8	51346	0.0155806	22	51346	0.0428466	46	51346	0.0895883	60	51346	0.116854
Piromycefinnis	0.132467	0.0973786	0.0891586	0.0499065	0.0312968	0.036517	0.0265926	35	51346	0.068165	9	51346	0.0175281	6	51346	0.0116854	24	51346	0.0467417	34	51346	0.0662174	55	51346	0.107116	34	51346	0.0662174	8	51346	0.0155806	2	51346	0.00389514	45	51346	0.0876407	35	51346	0.068165	10	51346	0.0194757	12	51346	0.0233709	23	51346	0.0447941
Cyllamyceaberensis	0.834248	0.0771725	0.101278	0.0718167	0.0720893	0.0968917	0.0676676	24	51346	0.0467417	5	51346	0.00973786	15	51346	0.0292136	32	51346	0.0623223	12	51346	0.0233709	108	51346	0.210338	9	51346	0.0175281	90	51346	0.175281	21	51346	0.040899	65	51346	0.126592	31	51346	0.0603747	131	51346	0.255132	22	51346	0.0428466	44	51346	0.0856931
Anaeromycesp	0.0899795	0.0679216	0.0839742	0.0138764	0.0133319	0.015824	0.00787729	0	51346	0	1	51346	0.00194757	15	51346	0.0292136	19	51346	0.0370039	11	51346	0.0214233	8	51346	0.0155806	3	51346	0.00584271	0	51346	0	8	51346	0.0155806	2	51346	0.00389514	4	51346	0.00779029	10	51346	0.0194757	11	51346	0.0214233	16	51346	0.0311611
Caecomyces	0.179952	0.0676781	0.0314602	0.0525844	0.0288872	0.134626	0.140244	27	51346	0.0525844	20	51346	0.0389514	12	51346	0.0233709	23	51346	0.0447941	8	51346	0.0155806	34	51346	0.0662174	59	51346	0.114907	33	51346	0.0642699	24	51346	0.0467417	205	51346	0.399252	168	51346	0.327192	85	51346	0.165544	5	51346	0.00973786	28	51346	0.054532
Anaeromycerobustus	0.0240077	0.0608616	0.0703674	0.227379	0.180189	0.0715732	0.0576161	103	51346	0.2006	64	51346	0.124645	74	51346	0.14412	135	51346	0.262922	16	51346	0.0311611	237	51346	0.461574	287	51346	0.558953	18	51346	0.0350563	18	51346	0.0350563	103	51346	0.2006	19	51346	0.0370039	13	51346	0.0253184	13	51346	0.0253184	47	51346	0.0915359
Aklioshbomycepapillarum	0.917323	0.0304308	0.0204249	0.0340825	0.0212678	0.0345694	0.0192492	10	51346	0.0194757	14	51346	0.027266	8	51346	0.0155806	21	51346	0.040899	9	51346	0.0175281	33	51346	0.0642699	8	51346	0.0155806	37	51346	0.0720601	13	51346	0.0253184	26	51346	0.0506369	29	51346	0.0564796	29	51346	0.0564796	10	51346	0.0194757	25	51346	0.0486893
Anaeromycecontortus	0.2381	0.0211798	0.0110359	0.0121723	0.00847529	0.0165544	0.00913492	5	51346	0.00973786	1	51346	0.00194757	11	51346	0.0214233	10	51346	0.0194757	8	51346	0.0155806	12	51346	0.0233709	3	51346	0.00584271	0	51346	0	9	51346	0.0175281	2	51346	0.00389514	13	51346	0.0253184	12	51346	0.0233709	3	51346	0.00584271	13	51346	0.0253184
Oontomyceanksri	0.00460556	0.0111985	0.00962768	0.0284832	0.0149259	0.00900752	0.00495938	19	51346	0.0370039	10	51346	0.0194757	25	51346	0.0486893	7	51346	0.013633	4	51346	0.00779029	18	51346	0.0350563	25	51346	0.0486893	9	51346	0.0175281	7	51346	0.013633	5	51346	0.00973786	0	51346	0	7	51346	0.013633	2	51346	0.00389514	4	51346	0.00779029
Anaeromycemucronatus	0.357438	0.00973786	0.0103515	0.00584271	0.00351103	0.00486893	0.00307938	2	51346	0.00389514	2	51346	0.00389514	3	51346	0.00584271	4	51346	0.00779029	6	51346	0.0116854	2	51346	0.00389514	5	51346	0.00973786	0	51346	0	3	51346	0.00584271	1	51346	0.00194757	3	51346	0.00584271	1	51346	0.00194757	5	51346	0.00973786	0	51346	0
Piromyces	0.0584774	0.00779029	0.00715583	0.0036517	0.00370007	0.00146068	0.0012882	2	51346	0.00389514	0	51346	0	6	51346	0.0116854	2	51346	0.00389514	0	51346	0	3	51346	0.00584271	2	51346	0.00389514	0	51346	0	0	51346	0	1	51346	0.00194757	0	51346	0	1	51346	0.00194757	0	51346	0	1	51346	0.00194757
Caecomycesp	0.633626	0.00705995	0.0059183	0.00462548	0.00456097	0.00705995	0.00575585	0	51346	0	1	51346	0.00194757	1	51346	0.00194757	6	51346	0.0116854	1	51346	0.00194757	5	51346	0.00973786	5	51346	0.00973786	0	51346	0	1	51346	0.00194757	8	51346	0.0155806	8	51346	0.0155806	4	51346	0.00779029	2	51346	0.00389514	0	51346	0
Tahromycemunnarensis	0.45196	0.00608616	0.00587811	0.00413859	0.00663587	0.00243446	0.00252997	0	51346	0	0	51346	0	0	51346	0	10	51346	0.0194757	2	51346	0.00389514	0	51346	0	5	51346	0.00973786	0	51346	0	0	51346	0	0	51346	0	2	51346	0.00389514	1	51346	0.00194757	0	51346	0	1	51346	0.00194757
Agriosomycelongus	0.714044	0.00462548	0.0044558	0.00340825	0.00347711	0.0031648	0.00237282	0	51346	0	0	51346	0	0	51346	0	3	51346	0.00584271	4	51346	0.00779029	3	51346	0.00584271	4	51346	0.00779029	0	51346	0	2	51346	0.00389514	0	51346	0	3	51346	0.00584271	1	51346	0.00194757	0	51346	0	3	51346	0.00584271
Cyllamycesp	0.841589	0.00194757	0.00515279	0.00340825	0.00830577	0.00170412	0.00265569	0	51346	0	0	51346	0	13	51346	0.0253184	0	51346	0	0	51346	0	0	51346	0	1	51346	0.00194757	0	51346	0	2	51346	0.00389514	1	51346	0.00194757	0	51346	0	0	51346	0	0	51346	0	0	51346	0
[truncated: 30 more columns]

## Sheet: 6G
Supplementry Table 6G : Groupwise mean relative abundance (%) of anaerobic fungal species present at above one percent mean relative frequency in rumen liquor.
Rumen Solid Fraction
Level7	p-values	MS: mean rel. freq. (%)	MS: std. dev. (%)	20%MLM: mean rel. freq. (%)	20%MLM: std. dev. (%)	30%MLM: mean rel. freq. (%)	30%MLM: std. dev. (%)
Neocallimastix_cameroonii	0.103507	39.1007	28.7179	14.1401	10.9547	32.9764	18.7229
Pecoramyce_sp	0.203407	21.8061	25.844	18.7238	12.892	5.09124	6.77285
Caecomyce communis	0.248405	8.90617	9.0449	3.64377	3.48451	19.2879	25.949
Piromyce_sp	0.560283	6.52236	7.64188	9.93609	7.4726	13.0901	12.2877
Capellomyce foraminis	0.00173852	4.24453	1.56096	11.3671	5.81768	2.29451	1.75485
Pecoramyce ruminantium	0.0960477	4.13818	3.70379	25.9045	16.8902	14.5855	18.3887
Neocallimastix_californiae	0.164394	2.99028	1.98171	1.44296	0.963265	3.43317	2.43455
Neocallimastigaceae_sp	0.176711	2.59148	4.44776	0.186601	0.18975	0.100085	0.0876572
Neocallimastix	0.105208	1.96131	1.16278	0.764591	0.605038	1.61445	1.00819
Neocallimastigaceae	0.0745357	1.93723	1.18373	4.14114	1.72395	2.33455	1.80326
Orpinomycesp	0.127853	1.28191	1.4054	0.656358	0.482927	0.215568	0.230741
Others		4.52		9.09		4.98
Rumen Liquid Fraction
Level7	p-values	MS: mean rel. freq. (%)	MS: std. dev. (%)	20%MLM: mean rel. freq. (%)	20%MLM: std. dev. (%)	30%MLM: mean rel. freq. (%)	30%MLM: std. dev. (%)
Neocallimastix_cameroonii	0.0486869	35.586	23.6221	11.1396	11.3074	26.9534	15.3549
Pecoramyce_sp	0.362659	17.8821	20.8627	14.6939	7.95489	7.09379	10.3563
Piromyce_sp	0.390318	14.1642	9.67534	8.4084	3.74218	11.4617	8.32578
Pecoramyce ruminantium	0.00644708	5.8785	3.41068	33.3743	14.7673	23.2564	19.937
Capellomyce foraminis	0.0214212	5.11724	8.03733	12.3001	5.06722	3.81261	2.05995
Neocallimastix_californiae	0.0969123	3.67312	2.48374	1.36914	1.4486	3.38074	2.09146
Joblinomyce apicalis	0.727438	3.0499	6.67337	2.59222	1.40575	1.38521	1.24904
Caecomycecommunis	0.133827	2.44566	1.75587	2.55473	3.23611	13.6505	19.47
Neocallimastigaceae	0.012004	2.25383	1.06961	6.29041	3.37402	3.12463	2.16846
Feramyceaustinii	0.0599845	2.19929	2.95611	0.304795	0.450423	0.0547754	0.0890971
Neocallimastigaceae_sp	0.20729	1.85847	3.50717	0.142416	0.0896594	0.118558	0.0725744
Neocallimastix	0.128409	1.62014	1.05677	0.747137	0.588896	1.45338	0.725373
Others		4.27		6.08		4.25
