# Supplementary material for: A diet containing Moringa oleifera alters the goat rumen microbiome: an insight into bacteria, ciliates and rumen anaerobic fungi
Source: Research Square preprint supplement (doi:10.21203/rs.3.rs-8826260/v1), 2026-02-23
Supplement: Supplementary file 4 [file 9a2140c56b7f262d15fe1ed0.xlsx]

## Sheet: S1A
Supplementary table S1A. Proximate composition of whole (leaf+twig) Moringa oleifera leaf
Treatments	CP (%)	Silica (%)	ADF (%)	NDF (%)	Ca (%)	P (%)
Leaf lamina	26.53	2.2	17.6	20	3.22	0.105
Leaf petiole	12.91	2.4	47	47.8	3.234	0.085
CP-Crude Protein; ADF-Acid Detergent Fiber ; NDF- Neutral Detergent Fiber ; Ca-Calcium; P- Phosphorus

## Sheet: S1B
Supplementary table S1B. Ingredients and nutrient composition of Masoor straw (MS) and Moringa leaf (ML) Diets
SN	Ingredients	Ingredients and composition of Concentrate Mixture
		Masoor straw (MS)	20% Moringa Leaf meal (MLM)	30% Moringa Leaf meal (MLM)
1	Bajra grains	Commercial	20	20
2	Maize grains	Concentrate mixture	10	10
3	Moth grains		10	-
4	Moong grains		30	30
5	Moringa leaf meal		20	30
6	Urea		5	5
7	Mineral mixture		3	3
8	Salt		2	2
			100	100
	Concentrate	CP 22.7 % and TDN 70.00 %	CP 26.98% and TDN 70.0%
	Masoor straw	CP 5 % and TDN 60.00 %
	TMR C: R 30:70	CP 10.31 % and TDN 63%	CP 11.59 % and TDN 63%
CP-Crude Protein; TDN-Total Digestible Nutrients; TMR-Total Mixed Ration, C-Concentrate, R-Roughage

## Sheet: S1C
Supplementary table S1C. Body weight and milk yield (ml/day) comparision of Masoor straw (MS) and Moringa leaf (ML) Diets
S.N.	Parameters	Masoor straw (MS)	20% Moringa Leaf meal (MLM)	30% Moringa Leaf meal (MLM)
1	i) Initial body weight (kg)	33.81±2.06	34.46 ± 2.91	35.90 ± 2.16
2	ii) Final body weight (kg)	38.26±1.91	40.58±2.69	42.53±1.84
3	Body weight Change (kg)	4.45	6.12	6.63
4	Milk Yield (ml/day)	319.76±22.80	446.53±13.80	521.28±15.83
	Intake of DM and Nutrients
5	TDMI(g/d)	1039.88±1.04	1102.45±15.52	1143.79±19.08
6	%DMI	2.87±0.02	2.90±0.02	2.89±0.01
7	DMI (g/Kg0.75 BW)	70.25±0.34	71.68±0.34	72.23±0.35
8	TDNI(g/d)	655.12±35.04	694.54±56.28	720.58±37.94
9	CPI(g/d)	236.05±2.51	273.85±3.85	284.12±4.74
	Nutrient use efficiency for milk production (Kg/l)
10	DMI	3.58±0.29	2.55±0.11	2.26±0.06
11	TDNI	2.50±0.18	1.58±0.13	1.40±0.10
12	CPI	0.81±0.06	0.63±0.03	0.56±0.01
	TDMI (g/d): Total Dry Matter Intake (grams per day)
	%DMI: Percentage of Dry Matter Intake (as a percentage of body weight or diet)
	DMI (g/Kg⁰.⁷⁵ BW): Dry Matter Intake per metabolic body weight (grams per kilogram of body weight raised to the power 0.75)
	TDNI (g/d): Total Digestible Nutrients Intake (grams per day)
	CPI (g/d): Crude Protein Intake (grams per day)

## Sheet: S1D
Supplementary Table 1D : Sample-wise IBDC accession numbers of 16srRNA, 18srRNA and ITS1 amplicons
Sample-wise IBDC accession numbers of 16SrRNA amplicons for rumen solid, liquid and fecal samples				Sample-wise IBDC accession numbers of 18SrRNA amplicons for rumen solid, liquid and fecal samples				Sample-wise IBDC accession numbers of ITS1 amplicons for rumen solid and liquid samples
Study ID	Sample ID	Sample name		Study ID	Sample ID	Sample name		Study ID	Sample ID	Sample name
INRP000182	INS0017280	G12S		INRP000182	INS0017373	G12R		INRP000182	INS0017423	G12S
INRP000182	INS0017281	G12S -TOPUP		INRP000182	INS0017374	G13R		INRP000182	INS0017424	G14S
INRP000182	INS0017282	G14S		INRP000182	INS0017375	G14R		INRP000182	INS0017425	G16S
INRP000182	INS0017283	G14S -TOPUP		INRP000182	INS0017376	G15R		INRP000182	INS0017426	G17S
INRP000182	INS0017284	G16S		INRP000182	INS0017377	G16R		INRP000182	INS0017429	G110S
INRP000182	INS0017287	G19S		INRP000182	INS0017378	G17R		INRP000182	INS0017430	G110S-TOPUP
INRP000182	INS0017288	G19S -TOPUP		INRP000182	INS0017379	G18R		INRP000182	INS0017431	G21S
INRP000182	INS0017289	G110S		INRP000182	INS0017380	G19R		INRP000182	INS0017432	G22S
INRP000182	INS0017290	G110S -TOPUP		INRP000182	INS0017381	G21R		INRP000182	INS0017433	G23S
INRP000182	INS0017291	G21S		INRP000182	INS0017382	G22R		INRP000182	INS0017434	G23S-TOPUP
INRP000182	INS0017292	G21S - TOPUP		INRP000182	INS0017383	G23R		INRP000182	INS0017435	G24S
INRP000182	INS0017293	G22S		INRP000182	INS0017384	G24R		INRP000182	INS0017436	G25S
INRP000182	INS0017294	G23S		INRP000182	INS0017385	G25R		INRP000182	INS0017437	G25S-TOPUP
INRP000182	INS0017295	G23S - TOPUP		INRP000182	INS0017386	G26R		INRP000182	INS0017438	G26S
INRP000182	INS0017296	G24S		INRP000182	INS0017387	G27R		INRP000182	INS0017439	G27S
INRP000182	INS0017297	G24S - TOPUP		INRP000182	INS0017388	G28R		INRP000182	INS0017440	G28S
INRP000182	INS0017298	G25S		INRP000182	INS0017389	G31R		INRP000182	INS0017441	G28S-TOPUP
INRP000182	INS0017299	G25S - TOPUP		INRP000182	INS0017390	G32R		INRP000182	INS0017442	G31S
INRP000182	INS0017300	G26S		INRP000182	INS0017391	G33R		INRP000182	INS0017443	G32S
INRP000182	INS0017301	G26S - TOPUP		INRP000182	INS0017392	G34R		INRP000182	INS0017444	G33S
INRP000182	INS0017302	G27S		INRP000182	INS0017393	G35R		INRP000182	INS0017445	G35S
INRP000182	INS0017303	G27S - TOPUP		INRP000182	INS0017394	G37R		INRP000182	INS0017446	G37S
INRP000182	INS0017304	G28S		INRP000182	INS0017395	G38R		INRP000182	INS0017447	G37S-TOPUP
INRP000182	INS0017305	G28S - TOPUP		INRP000182	INS0017396	G39R		INRP000182	INS0017448	G39S
INRP000182	INS0017306	G31S		INRP000182	INS0017397	G310R		INRP000182	INS0017449	G310S
INRP000182	INS0017309	G33S		INRP000182	INS0017398	G11F		INRP000182	INS0017450	G11L
INRP000182	INS0017310	G33S - TOPUP		INRP000182	INS0017399	G13F		INRP000182	INS0017451	G11L-TOPUP
INRP000182	INS0017311	G34S		INRP000182	INS0017400	G14F		INRP000182	INS0017452	G12L
INRP000182	INS0017314	G37S		INRP000182	INS0017401	G15F		INRP000182	INS0017453	G13L
INRP000182	INS0017315	G37S - TOPUP		INRP000182	INS0017402	G16F		INRP000182	INS0017454	G15L
INRP000182	INS0017316	G38S		INRP000182	INS0017403	G18F		INRP000182	INS0017455	G15L-TOPUP
INRP000182	INS0017317	G39S		INRP000182	INS0017404	G19F		INRP000182	INS0017456	G17L
INRP000182	INS0017318	G39S - TOPUP		INRP000182	INS0017405	G21F		INRP000182	INS0017457	G18L
INRP000182	INS0017319	G310S		INRP000182	INS0017406	G22F		INRP000182	INS0017458	G18L-TPUP
INRP000182	INS0017320	G310S - TOPUP		INRP000182	INS0017407	G23F		INRP000182	INS0017459	G19L
INRP000182	INS0017321	G12L		INRP000182	INS0017409	G25F		INRP000182	INS0017460	G110L
INRP000182	INS0017322	G12L - TOPUP		INRP000182	INS0017410	G26F		INRP000182	INS0017461	G110L-TOPUP
INRP000182	INS0017323	G13L		INRP000182	INS0017412	G28F		INRP000182	INS0017462	G21L
INRP000182	INS0017324	G13L - TOPUP		INRP000182	INS0017413	G29F		INRP000182	INS0017463	G22L
INRP000182	INS0017325	G15L		INRP000182	INS0017414	G31F		INRP000182	INS0017464	G23L
INRP000182	INS0017326	G15L - TOPUP		INRP000182	INS0017415	G32F		INRP000182	INS0017465	G24L
INRP000182	INS0017327	G18L		INRP000182	INS0017416	G33F		INRP000182	INS0017467	G25L
INRP000182	INS0017328	G18L - TOPUP		INRP000182	INS0017417	G34F		INRP000182	INS0017468	G26L
INRP000182	INS0017329	G21L		INRP000182	INS0017418	G35F		INRP000182	INS0017469	G26L-TOPUP
INRP000182	INS0017330	G21L - TOPUP		INRP000182	INS0017419	G36F		INRP000182	INS0017470	G27L
INRP000182	INS0017331	G22L		INRP000182	INS0017420	G37F		INRP000182	INS0017471	G27L-TOPUP
INRP000182	INS0017332	G23L		INRP000182	INS0017421	G38F		INRP000182	INS0017472	G28L
INRP000182	INS0017333	G24L		INRP000182	INS0017422	G39F		INRP000182	INS0017473	G31L
INRP000182	INS0017334	G25L						INRP000182	INS0017474	G32L
INRP000182	INS0017335	G26L						INRP000182	INS0017477	G34L
INRP000182	INS0017336	G27L						INRP000182	INS0017478	G35L
INRP000182	INS0017337	G28L						INRP000182	INS0017479	G37L
INRP000182	INS0017338	G31L						INRP000182	INS0017480	G38L
INRP000182	INS0017339	G32L						INRP000182	INS0017481	G38L-TOPUP
INRP000182	INS0017340	G33L						INRP000182	INS0017482	G39L
INRP000182	INS0017341	G33L-TOPUP						INRP000182	INS0017483	G39L-TOPUP
INRP000182	INS0017342	G34L						INRP000182	INS0017484	G310L
INRP000182	INS0017343	G35L
INRP000182	INS0017344	G37L
INRP000182	INS0017345	G38L
INRP000182	INS0017346	G39L
INRP000182	INS0017347	G310L
INRP000182	INS0017348	G12F
INRP000182	INS0017349	G13F
INRP000182	INS0017350	G14F
INRP000182	INS0017351	G15F
INRP000182	INS0017352	G16F
INRP000182	INS0017353	G17F
INRP000182	INS0017355	G19F
INRP000182	INS0017356	G21F
INRP000182	INS0017357	G22F
INRP000182	INS0017358	G23F
INRP000182	INS0017359	G24F
INRP000182	INS0017360	G25F
INRP000182	INS0017361	G26F
INRP000182	INS0017362	G27F
INRP000182	INS0017363	G28F
INRP000182	INS0017364	G31F
INRP000182	INS0017365	G32F
INRP000182	INS0017367	G34F
INRP000182	INS0017368	G35F
INRP000182	INS0017370	G37F
INRP000182	INS0017371	G38F
INRP000182	INS0017372	G39F
