# Supplementary material for: A diet containing Moringa oleifera alters the goat rumen microbiome: an insight into bacteria, ciliates and rumen anaerobic fungi
Source: Research Square preprint supplement (doi:10.21203/rs.3.rs-8826260/v1), 2026-02-23
Supplement: Supplementary file 5 [file d6c59f5064672ada18b5bd02.xlsx]

## Sheet: 4A
Supplementry Table 4A : Groupwise and samplewise mean relative abundance (%) of bacterial genera present in rumen solid fraction.
Genus	p-values	MS: mean rel. freq. (%)	MS: std. dev. (%)	20%MLM: mean rel. freq. (%)	20%MLM: std. dev. (%)	30%MLM: mean rel. freq. (%)	30%MLM: std. dev. (%)	G21S	G21S: parent seq. count	G21S: rel. freq. (%)	G22S	G22S: parent seq. count	G22S: rel. freq. (%)	G23S	G23S: parent seq. count	G23S: rel. freq. (%)	G24S	G24S: parent seq. count	G24S: rel. freq. (%)	G25S	G25S: parent seq. count	G25S: rel. freq. (%)	G26S	G26S: parent seq. count	G26S: rel. freq. (%)	G27S	G27S: parent seq. count	G27S: rel. freq. (%)	G28S	G28S: parent seq. count	G28S: rel. freq. (%)	G310S	G310S: parent seq. count	G310S: rel. freq. (%)	G31S	G31S: parent seq. count	G31S: rel. freq. (%)	G33S	G33S: parent seq. count	G33S: rel. freq. (%)	G34S	G34S: parent seq. count	G34S: rel. freq. (%)	G37S	G37S: parent seq. count	G37S: rel. freq. (%)	G38S	G38S: parent seq. count	G38S: rel. freq. (%)
Segatella	0.337739	15.1829	2.89174	12.3348	3.02366	12.355	3.90764	7820	58188	13.4392	3369	58188	5.78985	5639	58188	9.691	8538	58188	14.6731	9139	58188	15.706	8165	58188	14.0321	6771	58188	11.6364	7978	58188	13.7107	3348	58188	5.75376	5370	58188	9.22871	11246	58188	19.327	7080	58188	12.1675	8041	58188	13.819	7090	58188	12.1846
Xylanibacter	0.0221072	8.23366	5.08003	16.6009	5.251	9.22674	4.92713	7433	58188	12.7741	10036	58188	17.2475	14243	58188	24.4776	14875	58188	25.5637	9176	58188	15.7696	8476	58188	14.5666	6411	58188	11.0177	6628	58188	11.3907	1260	58188	2.16539	3506	58188	6.0253	4867	58188	8.36427	9903	58188	17.019	7749	58188	13.3172	7452	58188	12.8068
Subdivision5_genera_incertae_sedis	0.0495874	7.24101	2.13079	3.6077	1.88064	6.81044	3.3764	1873	58188	3.21888	4785	58188	8.22335	1353	58188	2.32522	1834	58188	3.15185	1414	58188	2.43005	1051	58188	1.80621	2441	58188	4.19502	2043	58188	3.51103	7363	58188	12.6538	3250	58188	5.58534	1761	58188	3.0264	1591	58188	2.73424	4318	58188	7.42077	3468	58188	5.95999
Sodaliphilus	0.00572688	6.22362	3.05515	2.54498	1.05159	2.27637	1.18002	944	58188	1.62233	1458	58188	2.50567	2661	58188	4.57311	608	58188	1.04489	1271	58188	2.1843	1712	58188	2.94219	1134	58188	1.94886	2059	58188	3.53853	2223	58188	3.82038	1678	58188	2.88376	1082	58188	1.85949	292	58188	0.501822	2203	58188	3.786	667	58188	1.14628
Hallella	0.0088034	4.86148	1.46773	2.83284	0.853595	2.69619	0.888829	1375	58188	2.36303	1014	58188	1.74263	1195	58188	2.05369	1506	58188	2.58816	2055	58188	3.53166	2181	58188	3.7482	1355	58188	2.32866	2506	58188	4.30673	397	58188	0.682271	2009	58188	3.4526	1714	58188	2.94562	1500	58188	2.57785	1776	58188	3.05218	1532	58188	2.63285
Succiniclasticum	0.00536556	3.82759	0.957991	2.38752	0.656232	2.03282	0.746046	1578	58188	2.7119	1702	58188	2.925	531	58188	0.912559	1323	58188	2.27366	1723	58188	2.96109	1517	58188	2.60707	1084	58188	1.86293	1656	58188	2.84595	1071	58188	1.84059	716	58188	1.23049	1598	58188	2.74627	415	58188	0.713205	1529	58188	2.62769	1609	58188	2.76517
Prevotella	0.0783801	2.21283	0.331015	3.00663	0.817287	2.18626	0.667193	1573	58188	2.70331	890	58188	1.52952	1478	58188	2.54004	2092	58188	3.59524	2030	58188	3.48869	2612	58188	4.4889	1590	58188	2.73252	1731	58188	2.97484	370	58188	0.63587	1426	58188	2.45068	1658	58188	2.84938	1340	58188	2.30288	1515	58188	2.60363	1255	58188	2.1568
Streptophyta	0.000188463	1.86224	0.722255	0.56326	0.239538	0.634151	0.23646	377	58188	0.6479	385	58188	0.661648	636	58188	1.09301	232	58188	0.398708	142	58188	0.244037	281	58188	0.482917	234	58188	0.402145	335	58188	0.57572	582	58188	1.00021	287	58188	0.493229	394	58188	0.677116	102	58188	0.175294	460	58188	0.790541	375	58188	0.644463
Lucifera	0.950862	1.6732	0.69867	1.7669	1.75168	1.54205	0.83157	1257	58188	2.16024	3509	58188	6.03045	1261	58188	2.16711	797	58188	1.3697	76	58188	0.130611	288	58188	0.494947	625	58188	1.0741	412	58188	0.70805	1652	58188	2.83907	1027	58188	1.76497	456	58188	0.783667	1522	58188	2.61566	324	58188	0.556816	559	58188	0.960679
Fibrobacter	0.00619134	1.60686	0.740809	0.808156	0.483444	0.456893	0.165899	485	58188	0.833505	169	58188	0.290438	149	58188	0.256067	886	58188	1.52265	522	58188	0.897092	499	58188	0.857565	168	58188	0.288719	884	58188	1.51921	152	58188	0.261222	219	58188	0.376366	341	58188	0.586031	130	58188	0.223414	315	58188	0.541349	286	58188	0.49151
Anseongella	0.0396093	1.54259	0.297569	0.769703	0.395243	1.05495	0.571561	197	58188	0.338558	245	58188	0.421049	237	58188	0.4073	298	58188	0.512133	801	58188	1.37657	424	58188	0.728673	758	58188	1.30267	623	58188	1.07067	44	58188	0.075617	863	58188	1.48312	470	58188	0.807727	277	58188	0.476043	1042	58188	1.79075	788	58188	1.35423
Fretibacterium	0.0740737	1.4381	1.42279	0.452413	0.380505	0.32751	0.203853	508	58188	0.873032	37	58188	0.063587	266	58188	0.457139	519	58188	0.891936	43	58188	0.0738984	573	58188	0.984739	35	58188	0.0601499	125	58188	0.214821	21	58188	0.0360899	361	58188	0.620403	198	58188	0.340276	99	58188	0.170138	91	58188	0.15639	335	58188	0.57572
Selenomonas	0.372613	1.41919	1.23049	1.3523	0.987395	0.721307	0.310604	1128	58188	1.93854	148	58188	0.254348	564	58188	0.969272	1945	58188	3.34261	1171	58188	2.01244	828	58188	1.42297	180	58188	0.309342	331	58188	0.568846	186	58188	0.319654	292	58188	0.501822	801	58188	1.37657	395	58188	0.678834	484	58188	0.831787	444	58188	0.763044
Syntrophococcus	0.00519043	1.34804	0.31493	0.620188	0.229603	1.02206	0.389775	365	58188	0.627277	477	58188	0.819757	387	58188	0.665086	468	58188	0.80429	122	58188	0.209665	220	58188	0.378085	551	58188	0.946931	297	58188	0.510415	641	58188	1.1016	673	58188	1.1566	787	58188	1.35251	179	58188	0.307624	373	58188	0.641026	611	58188	1.05004
Olsenella	0.0211911	1.33911	0.772708	0.270245	0.210563	0.910595	0.676554	113	58188	0.194198	361	58188	0.620403	215	58188	0.369492	59	58188	0.101395	27	58188	0.0464013	82	58188	0.140923	337	58188	0.579157	64	58188	0.109988	938	58188	1.61202	320	58188	0.549942	212	58188	0.364336	97	58188	0.166701	491	58188	0.843817	373	58188	0.641026
Hoylesella	0.18792	1.32158	0.333285	1.33876	0.57427	0.90544	0.298159	723	58188	1.24252	259	58188	0.445109	469	58188	0.806008	842	58188	1.44703	1384	58188	2.3785	652	58188	1.12051	1149	58188	1.97463	754	58188	1.2958	387	58188	0.665086	449	58188	0.771637	442	58188	0.759607	406	58188	0.697738	619	58188	1.06379	469	58188	0.806008
Leyella	0.742471	1.2714	0.641852	1.52931	0.528903	1.58452	0.800507	974	58188	1.67388	1499	58188	2.57613	1171	58188	2.01244	863	58188	1.48312	599	58188	1.02942	791	58188	1.35939	453	58188	0.778511	769	58188	1.32158	199	58188	0.341995	1523	58188	2.61738	608	58188	1.04489	1153	58188	1.98151	730	58188	1.25455	1549	58188	2.66206
Paraprevotella	0.274123	1.22156	0.615102	1.63694	0.733627	2.13446	1.13284	624	58188	1.07239	1047	58188	1.79934	473	58188	0.812882	441	58188	0.757888	1151	58188	1.97807	786	58188	1.35079	1737	58188	2.98515	1361	58188	2.33897	201	58188	0.345432	1691	58188	2.9061	990	58188	1.70138	411	58188	0.706331	1959	58188	3.36667	1842	58188	3.1656
Kandleria	0.778534	1.02358	1.43503	0.502466	0.807627	0.776301	1.37635	159	58188	0.273252	212	58188	0.364336	1522	58188	2.61566	129	58188	0.221695	50	58188	0.0859284	46	58188	0.0790541	15	58188	0.0257785	206	58188	0.354025	101	58188	0.173575	4	58188	0.00687427	2360	58188	4.05582	577	58188	0.991613	52	58188	0.0893655	46	58188	0.0790541
Treponema	0.228387	0.936276	0.386089	1.25778	0.766905	0.719098	0.225616	542	58188	0.931464	446	58188	0.766481	280	58188	0.481199	356	58188	0.61181	1419	58188	2.43865	1168	58188	2.00729	347	58188	0.596343	1297	58188	2.22898	429	58188	0.737265	275	58188	0.472606	350	58188	0.601499	306	58188	0.525882	483	58188	0.830068	697	58188	1.19784
Bilifractor	0.0294242	0.914278	0.285806	0.378944	0.212375	0.996278	0.590909	290	58188	0.498385	411	58188	0.706331	337	58188	0.579157	172	58188	0.295594	43	58188	0.0738984	73	58188	0.125455	296	58188	0.508696	142	58188	0.244037	617	58188	1.06036	464	58188	0.797415	632	58188	1.08613	88	58188	0.151234	253	58188	0.434798	773	58188	1.32845
Parabacteroides	0.00384523	0.864439	0.220181	2.35723	0.682271	1.4981	0.742309	1256	58188	2.15852	949	58188	1.63092	1310	58188	2.25132	1144	58188	1.96604	1474	58188	2.53317	2356	58188	4.04894	1252	58188	2.15165	1232	58188	2.11728	261	58188	0.448546	1702	58188	2.925	1178	58188	2.02447	608	58188	1.04489	711	58188	1.2219	978	58188	1.68076
Duncaniella	0.0161004	0.858596	0.415456	0.444464	0.178297	0.339785	0.182586	318	58188	0.546504	432	58188	0.742421	293	58188	0.50354	139	58188	0.238881	185	58188	0.317935	178	58188	0.305905	150	58188	0.257785	374	58188	0.642744	154	58188	0.264659	244	58188	0.41933	156	58188	0.268097	44	58188	0.075617	419	58188	0.72008	194	58188	0.333402
Butyrivibrio	0.0916949	0.848285	0.222214	2.18881	0.81776	2.4249	1.663	1563	58188	2.68612	986	58188	1.69451	1132	58188	1.94542	1622	58188	2.78752	984	58188	1.69107	2252	58188	3.87021	652	58188	1.12051	998	58188	1.71513	1948	58188	3.34777	479	58188	0.823194	1452	58188	2.49536	3421	58188	5.87922	1352	58188	2.3235	809	58188	1.39032
Coprobacter	0.933729	0.803946	0.345528	0.821475	0.524241	0.900284	0.452397	919	58188	1.57936	223	58188	0.383241	239	58188	0.410738	180	58188	0.309342	487	58188	0.836942	257	58188	0.441672	503	58188	0.864439	1016	58188	1.74606	226	58188	0.388396	582	58188	1.00021	902	58188	1.55015	135	58188	0.232007	569	58188	0.977865	432	58188	0.742421
Porcincola	0.0121856	0.749639	0.218363	0.331898	0.185491	0.412211	0.213712	237	58188	0.4073	239	58188	0.410738	399	58188	0.685708	256	58188	0.439953	38	58188	0.0653056	88	58188	0.151234	182	58188	0.312779	106	58188	0.182168	498	58188	0.855847	244	58188	0.41933	241	58188	0.414175	103	58188	0.177012	133	58188	0.228569	155	58188	0.266378
Blautia	0.862127	0.711831	0.293382	0.613099	0.304728	0.643481	0.279084	709	58188	1.21846	268	58188	0.460576	396	58188	0.680553	272	58188	0.46745	104	58188	0.178731	213	58188	0.366055	374	58188	0.642744	518	58188	0.890218	387	58188	0.665086	422	58188	0.725235	634	58188	1.08957	70	58188	0.1203	257	58188	0.441672	386	58188	0.663367
Solibaculum	0.141546	0.701519	0.294144	0.355958	0.165486	0.526127	0.336674	153	58188	0.262941	402	58188	0.690864	157	58188	0.269815	75	58188	0.128893	137	58188	0.235444	297	58188	0.510415	224	58188	0.384959	212	58188	0.364336	772	58188	1.32673	310	58188	0.532756	233	58188	0.400426	199	58188	0.341995	147	58188	0.252629	263	58188	0.451983
Ruminococcus	0.0127544	0.698082	0.193555	1.76132	0.742665	1.60563	0.382225	812	58188	1.39548	585	58188	1.00536	693	58188	1.19097	745	58188	1.28033	1458	58188	2.50567	1014	58188	1.74263	1958	58188	3.36495	934	58188	1.60514	941	58188	1.61717	748	58188	1.28549	1338	58188	2.29944	831	58188	1.42813	774	58188	1.33017	1190	58188	2.0451
Luoshenia	0.474424	0.695332	0.432056	0.442961	0.231299	0.608618	0.379766	382	58188	0.656493	529	58188	0.909122	247	58188	0.424486	187	58188	0.321372	88	58188	0.151234	138	58188	0.237162	306	58188	0.525882	185	58188	0.317935	669	58188	1.14972	336	58188	0.577439	164	58188	0.281845	715	58188	1.22878	179	58188	0.307624	172	58188	0.295594
Dysgonomonas	0.601151	0.675397	0.110192	0.556171	0.343745	0.51778	0.179797	210	58188	0.360899	119	58188	0.20451	234	58188	0.402145	108	58188	0.185605	718	58188	1.23393	275	58188	0.472606	547	58188	0.940056	378	58188	0.649618	177	58188	0.304186	457	58188	0.785385	319	58188	0.548223	143	58188	0.245755	269	58188	0.462295	356	58188	0.61181
Saccharofermentans	0.00100089	0.623496	0.235185	2.45927	1.06873	2.85626	0.683781	1894	58188	3.25497	1345	58188	2.31147	984	58188	1.69107	429	58188	0.737265	1605	58188	2.7583	1544	58188	2.65347	2635	58188	4.52843	1012	58188	1.73919	2298	58188	3.94927	2100	58188	3.60899	1273	58188	2.18774	1820	58188	3.12779	1301	58188	2.23586	1632	58188	2.8047
Alistipes	0.21167	0.62109	0.145007	0.393337	0.244826	0.407546	0.218422	194	58188	0.333402	68	58188	0.116863	170	58188	0.292156	184	58188	0.316216	331	58188	0.568846	116	58188	0.199354	213	58188	0.366055	555	58188	0.953805	67	58188	0.115144	286	58188	0.49151	278	58188	0.477762	70	58188	0.1203	250	58188	0.429642	244	58188	0.41933
Porphyromonas	0.498971	0.620059	0.44568	0.718146	0.763662	0.362372	0.112819	109	58188	0.187324	110	58188	0.189042	63	58188	0.10827	44	58188	0.075617	672	58188	1.15488	442	58188	0.759607	457	58188	0.785385	1446	58188	2.48505	73	58188	0.125455	244	58188	0.41933	175	58188	0.300749	200	58188	0.343713	238	58188	0.409019	263	58188	0.451983
Barnesiella	0.0712962	0.590843	0.288407	0.193768	0.108091	0.641762	0.522461	141	58188	0.242318	28	58188	0.0481199	60	58188	0.103114	30	58188	0.051557	162	58188	0.278408	131	58188	0.225132	133	58188	0.228569	217	58188	0.372929	198	58188	0.340276	171	58188	0.293875	121	58188	0.207947	89	58188	0.152952	919	58188	1.57936	378	58188	0.649618
Extibacter	0.0116885	0.520038	0.300057	0.0936619	0.112691	0.334139	0.207091	34	58188	0.0584313	66	58188	0.113425	44	58188	0.075617	27	58188	0.0464013	7	58188	0.01203	17	58188	0.0292156	222	58188	0.381522	19	58188	0.0326528	384	58188	0.65993	280	58188	0.481199	119	58188	0.20451	38	58188	0.0653056	84	58188	0.14436	145	58188	0.249192
Stomatobaculum	0.770505	0.506634	0.146546	0.424486	0.19839	0.45984	0.187637	231	58188	0.396989	135	58188	0.232007	153	58188	0.262941	112	58188	0.19248	273	58188	0.469169	238	58188	0.409019	353	58188	0.606654	481	58188	0.826631	134	58188	0.230288	296	58188	0.508696	283	58188	0.486355	88	58188	0.151234	431	58188	0.740703	321	58188	0.55166
Phocaeicola	0.19249	0.498385	0.123584	0.42642	0.20397	0.299276	0.158181	201	58188	0.345432	88	58188	0.151234	173	58188	0.297312	150	58188	0.257785	362	58188	0.622121	279	58188	0.47948	248	58188	0.426205	484	58188	0.831787	75	58188	0.128893	118	58188	0.202791	286	58188	0.49151	67	58188	0.115144	239	58188	0.410738	132	58188	0.226851
Lancefieldella	0.00481716	0.49426	0.247294	0.0762614	0.0507628	0.245264	0.203385	29	58188	0.0498385	103	58188	0.177012	80	58188	0.137485	41	58188	0.0704613	29	58188	0.0498385	16	58188	0.0274971	44	58188	0.075617	13	58188	0.0223414	198	58188	0.340276	66	58188	0.113425	92	58188	0.158108	19	58188	0.0326528	99	58188	0.170138	120	58188	0.206228
Bacteroides	0.921227	0.486011	0.152236	0.52137	0.192621	0.481199	0.212176	388	58188	0.666804	86	58188	0.147797	232	58188	0.398708	253	58188	0.434798	339	58188	0.582594	298	58188	0.512133	493	58188	0.847254	338	58188	0.580876	81	58188	0.139204	316	58188	0.543067	332	58188	0.570564	122	58188	0.209665	386	58188	0.663367	279	58188	0.47948
Halothermothrix	0.0693646	0.439266	0.102905	0.164123	0.0851732	0.293875	0.274564	59	58188	0.101395	47	58188	0.0807727	42	58188	0.0721798	119	58188	0.20451	166	58188	0.285282	99	58188	0.170138	58	58188	0.0996769	174	58188	0.299031	57	58188	0.0979583	57	58188	0.0979583	67	58188	0.115144	34	58188	0.0584313	317	58188	0.544786	175	58188	0.300749
Desulfovibrio	0.699358	0.438235	0.162482	0.30612	0.0845879	0.413193	0.446551	179	58188	0.307624	263	58188	0.451983	224	58188	0.384959	145	58188	0.249192	216	58188	0.371211	113	58188	0.194198	123	58188	0.211384	162	58188	0.278408	863	58188	1.48312	173	58188	0.297312	113	58188	0.194198	28	58188	0.0481199	178	58188	0.305905	206	58188	0.354025
Tangfeifania	0.530695	0.438235	0.365783	0.270674	0.230821	0.277917	0.174654	179	58188	0.307624	88	58188	0.151234	86	58188	0.147797	32	58188	0.0549942	491	58188	0.843817	109	58188	0.187324	181	58188	0.311061	94	58188	0.161545	50	58188	0.0859284	189	58188	0.324809	346	58188	0.594624	62	58188	0.106551	150	58188	0.257785	81	58188	0.139204
Christensenella (Negatively corelated with methane emission)	0.771727	0.431704	0.21865	0.454346	0.234603	0.531037	0.251742	296	58188	0.508696	438	58188	0.752733	263	58188	0.451983	118	58188	0.202791	130	58188	0.223414	161	58188	0.276689	515	58188	0.885062	194	58188	0.333402	596	58188	1.02427	370	58188	0.63587	142	58188	0.244037	408	58188	0.701176	215	58188	0.369492	204	58188	0.350588
Olivibacter	0.00621918	0.424486	0.276539	0.0861432	0.10248	0.10115	0.0737036	23	58188	0.0395271	7	58188	0.01203	29	58188	0.0498385	23	58188	0.0395271	38	58188	0.0653056	49	58188	0.0842098	27	58188	0.0464013	205	58188	0.352306	45	58188	0.0773355	51	58188	0.0876469	35	58188	0.0601499	10	58188	0.0171857	41	58188	0.0704613	76	58188	0.130611
Marvinbryantia	0.169157	0.41933	0.0705492	0.734688	0.56421	0.340767	0.168632	581	58188	0.998488	333	58188	0.572283	1210	58188	2.07947	401	58188	0.689146	203	58188	0.348869	265	58188	0.45542	58	58188	0.0996769	369	58188	0.634151	313	58188	0.537912	110	58188	0.189042	103	58188	0.177012	339	58188	0.582594	277	58188	0.476043	127	58188	0.218258
Vescimonas	0.608227	0.417612	0.0891339	0.533615	0.38031	0.665086	0.511652	227	58188	0.390115	154	58188	0.264659	181	58188	0.311061	82	58188	0.140923	223	58188	0.383241	373	58188	0.641026	829	58188	1.42469	415	58188	0.713205	232	58188	0.398708	1076	58188	1.84918	169	58188	0.290438	134	58188	0.230288	298	58188	0.512133	369	58188	0.634151
Beduinibacterium	0.0153553	0.336495	0.124709	0.164123	0.0761473	0.19027	0.0670821	112	58188	0.19248	120	58188	0.206228	161	58188	0.276689	89	58188	0.152952	42	58188	0.0721798	73	58188	0.125455	142	58188	0.244037	25	58188	0.0429642	168	58188	0.288719	157	58188	0.269815	73	58188	0.125455	132	58188	0.226851	73	58188	0.125455	67	58188	0.115144
Pseudobutyrivibrio	0.0531206	0.333058	0.27721	1.43629	0.928494	0.723762	0.622841	845	58188	1.45219	558	58188	0.958961	475	58188	0.81632	1825	58188	3.13639	945	58188	1.62405	1508	58188	2.5916	135	58188	0.232007	395	58188	0.678834	179	58188	0.307624	96	58188	0.164982	291	58188	0.500103	1112	58188	1.91105	807	58188	1.38688	373	58188	0.641026
Hespellia	0.0307991	0.330652	0.143096	0.166701	0.195577	0.583331	0.354411	75	58188	0.128893	195	58188	0.335121	84	58188	0.14436	17	58188	0.0292156	2	58188	0.00343713	19	58188	0.0326528	356	58188	0.61181	28	58188	0.0481199	268	58188	0.460576	392	58188	0.673678	224	58188	0.384959	42	58188	0.0721798	212	58188	0.364336	531	58188	0.912559
Gehongia	0.639683	0.329621	0.129436	0.355529	0.194302	0.271043	0.1313	338	58188	0.580876	410	58188	0.704613	276	58188	0.474325	149	58188	0.256067	62	58188	0.106551	136	58188	0.233725	167	58188	0.287001	117	58188	0.201072	321	58188	0.55166	180	58188	0.309342	127	58188	0.218258	190	58188	0.326528	91	58188	0.15639	100	58188	0.171857
Succinivibrio (low methane emission)	0.774754	0.301093	0.185062	0.227066	0.177904	0.248456	0.139517	114	58188	0.195917	83	58188	0.142641	99	58188	0.170138	390	58188	0.670241	163	58188	0.280126	77	58188	0.13233	30	58188	0.051557	101	58188	0.173575	39	58188	0.0670241	70	58188	0.1203	247	58188	0.424486	70	58188	0.1203	225	58188	0.386678	227	58188	0.390115
Carboxylicivirga	0.38366	0.300062	0.333708	0.142856	0.172822	0.129875	0.0822651	28	58188	0.0481199	43	58188	0.0738984	32	58188	0.0549942	13	58188	0.0223414	342	58188	0.58775	46	58188	0.0790541	93	58188	0.159827	68	58188	0.116863	105	58188	0.18045	44	58188	0.075617	15	58188	0.0257785	11	58188	0.0189042	141	58188	0.242318	98	58188	0.16842
Acetatifactor	0.0302983	0.28597	0.133176	0.122878	0.0424107	0.191006	0.091042	93	58188	0.159827	70	58188	0.1203	91	58188	0.15639	53	58188	0.0910841	24	58188	0.0412456	59	58188	0.101395	107	58188	0.183887	75	58188	0.128893	197	58188	0.338558	126	58188	0.216539	131	58188	0.225132	21	58188	0.0360899	63	58188	0.10827	97	58188	0.166701
Eubacterium	0.284814	0.282876	0.116359	0.461865	0.233725	0.466959	0.196604	400	58188	0.687427	414	58188	0.711487	471	58188	0.809445	153	58188	0.262941	111	58188	0.190761	246	58188	0.422768	259	58188	0.445109	96	58188	0.164982	448	58188	0.769918	355	58188	0.610091	151	58188	0.259504	362	58188	0.622121	101	58188	0.173575	246	58188	0.422768
Methanobrevibacter	0.767438	0.278752	0.341706	0.228355	0.179951	0.32751	0.213666	114	58188	0.195917	231	58188	0.396989	336	58188	0.577439	149	58188	0.256067	4	58188	0.00687427	34	58188	0.0584313	158	58188	0.271534	37	58188	0.063587	421	58188	0.723517	146	58188	0.250911	220	58188	0.378085	31	58188	0.0532756	41	58188	0.0704613	235	58188	0.403863
Pedobacter	0.21411	0.273252	0.208804	0.721369	0.741656	0.282091	0.131019	67	58188	0.115144	69	58188	0.118581	59	58188	0.101395	28	58188	0.0481199	292	58188	0.501822	927	58188	1.59311	728	58188	1.25112	1188	58188	2.04166	40	58188	0.0687427	235	58188	0.403863	235	58188	0.403863	91	58188	0.15639	232	58188	0.398708	209	58188	0.359181
Oligosphaera	0.152783	0.267753	0.161111	0.106981	0.0489622	0.234707	0.189895	39	58188	0.0670241	29	58188	0.0498385	64	58188	0.109988	29	58188	0.0498385	91	58188	0.15639	53	58188	0.0910841	112	58188	0.19248	81	58188	0.139204	305	58188	0.524163	40	58188	0.0687427	34	58188	0.0584313	21	58188	0.0360899	285	58188	0.489792	105	58188	0.18045
Clostridium_sensu_stricto	0.0485083	0.266378	0.140482	1.07797	1.37502	3.68584	3.38572	257	58188	0.441672	1925	58188	3.30824	242	58188	0.415893	136	58188	0.233725	97	58188	0.166701	166	58188	0.285282	2091	58188	3.59352	104	58188	0.178731	4719	58188	8.10992	5649	58188	9.70819	318	58188	0.546504	1573	58188	2.70331	688	58188	1.18237	988	58188	1.69794
Capnocytophaga	0.903507	0.245755	0.162573	0.304831	0.24566	0.292156	0.21296	71	58188	0.122018	55	58188	0.0945212	29	58188	0.0498385	20	58188	0.0343713	355	58188	0.610091	199	58188	0.341995	312	58188	0.536193	378	58188	0.649618	296	58188	0.508696	80	58188	0.137485	55	58188	0.0945212	68	58188	0.116863	183	58188	0.314498	103	58188	0.177012
Hydrogenibacillus	0.105999	0.238537	0.121513	0.119226	0.0534205	0.168174	0.083181	92	58188	0.158108	109	58188	0.187324	75	58188	0.128893	43	58188	0.0738984	8	58188	0.0137485	50	58188	0.0859284	87	58188	0.149515	91	58188	0.15639	210	58188	0.360899	90	58188	0.154671	83	58188	0.142641	61	58188	0.104833	59	58188	0.101395	74	58188	0.127174
Eisenbergiella	0.302715	0.218602	0.043455	0.17379	0.0534861	0.212366	0.0564843	132	58188	0.226851	145	58188	0.249192	104	58188	0.178731	99	58188	0.170138	67	58188	0.115144	52	58188	0.0893655	130	58188	0.223414	80	58188	0.137485	173	58188	0.297312	148	58188	0.254348	110	58188	0.189042	81	58188	0.139204	78	58188	0.134048	132	58188	0.226851
Coprococcus	0.00391946	0.214821	0.059642	0.787104	0.255291	0.611564	0.284554	664	58188	1.14113	322	58188	0.553379	446	58188	0.766481	535	58188	0.919434	306	58188	0.525882	698	58188	1.19956	302	58188	0.519007	391	58188	0.67196	253	58188	0.434798	259	58188	0.445109	692	58188	1.18925	409	58188	0.702894	287	58188	0.493229	444	58188	0.763044
Acetobacteroides	0.41271	0.213102	0.101887	0.118152	0.107179	0.134294	0.134279	220	58188	0.378085	13	58188	0.0223414	76	58188	0.130611	14	58188	0.0240599	60	58188	0.103114	37	58188	0.063587	43	58188	0.0738984	87	58188	0.149515	41	58188	0.0704613	252	58188	0.433079	33	58188	0.0567127	10	58188	0.0171857	114	58188	0.195917	22	58188	0.0378085
Tessaracoccus	0.000618156	0.199698	0.0964446	0.0307194	0.00958544	0.0611319	0.0536021	27	58188	0.0464013	22	58188	0.0378085	20	58188	0.0343713	7	58188	0.01203	19	58188	0.0326528	18	58188	0.0309342	13	58188	0.0223414	17	58188	0.0292156	106	58188	0.182168	14	58188	0.0240599	48	58188	0.0824912	9	58188	0.0154671	20	58188	0.0343713	19	58188	0.0326528
Mitsuokella	0.18275	0.198323	0.101069	0.143071	0.0474224	0.119809	0.0448779	105	58188	0.18045	30	58188	0.051557	48	58188	0.0824912	107	58188	0.183887	102	58188	0.175294	107	58188	0.183887	89	58188	0.152952	78	58188	0.134048	42	58188	0.0721798	72	58188	0.123737	112	58188	0.19248	34	58188	0.0584313	68	58188	0.116863	99	58188	0.170138
Ruminobacter	0.170603	0.19626	0.202582	0.903107	0.806352	0.918452	0.639562	160	58188	0.274971	234	58188	0.402145	63	58188	0.10827	813	58188	1.3972	1221	58188	2.09837	249	58188	0.427923	184	58188	0.316216	1280	58188	2.19977	195	58188	0.335121	131	58188	0.225132	268	58188	0.460576	709	58188	1.21846	496	58188	0.852409	1293	58188	2.22211
Acetivibrio	0.0541697	0.192136	0.0772736	0.272178	0.0872879	0.473834	0.282373	117	58188	0.201072	228	58188	0.391833	137	58188	0.235444	84	58188	0.14436	110	58188	0.189042	201	58188	0.345432	220	58188	0.378085	170	58188	0.292156	550	58188	0.945212	226	58188	0.388396	123	58188	0.211384	115	58188	0.197635	126	58188	0.216539	320	58188	0.549942
Anaerovorax	0.174104	0.186293	0.127909	0.0992473	0.0392811	0.126192	0.0354691	71	58188	0.122018	68	58188	0.116863	48	58188	0.0824912	25	58188	0.0429642	42	58188	0.0721798	99	58188	0.170138	74	58188	0.127174	35	58188	0.0601499	106	58188	0.182168	71	58188	0.122018	79	58188	0.135767	49	58188	0.0842098	51	58188	0.0876469	98	58188	0.16842
Zea	0.0015556	0.178387	0.0973711	0.0444679	0.0194706	0.052048	0.0284876	41	58188	0.0704613	45	58188	0.0773355	26	58188	0.0446828	8	58188	0.0137485	18	58188	0.0309342	24	58188	0.0412456	19	58188	0.0326528	26	58188	0.0446828	53	58188	0.0910841	25	58188	0.0429642	41	58188	0.0704613	14	58188	0.0240599	22	58188	0.0378085	50	58188	0.0859284
Moryella	0.0995375	0.176669	0.0331893	0.0994621	0.0628067	0.121527	0.0568184	90	58188	0.154671	77	58188	0.13233	129	58188	0.221695	33	58188	0.0567127	19	58188	0.0326528	19	58188	0.0326528	62	58188	0.106551	34	58188	0.0584313	96	58188	0.164982	88	58188	0.151234	123	58188	0.211384	14	58188	0.0240599	48	58188	0.0824912	55	58188	0.0945212
Ruminococcoides	0.638857	0.167732	0.220689	0.325239	0.298791	0.285037	0.263871	137	58188	0.235444	434	58188	0.745858	57	58188	0.0979583	51	58188	0.0876469	63	58188	0.10827	58	58188	0.0996769	520	58188	0.893655	194	58188	0.333402	516	58188	0.886781	95	58188	0.163264	33	58188	0.0567127	53	58188	0.0910841	95	58188	0.163264	210	58188	0.360899
Falsiporphyromonas	0.44111	0.15364	0.0395136	0.28743	0.23414	0.212611	0.132601	86	58188	0.147797	40	58188	0.0687427	37	58188	0.063587	41	58188	0.0704613	420	58188	0.721798	142	58188	0.244037	280	58188	0.481199	292	58188	0.501822	22	58188	0.0378085	280	58188	0.481199	112	58188	0.19248	58	58188	0.0996769	127	58188	0.218258	167	58188	0.287001
Pseudomonas	0.172269	0.151921	0.0708133	0.879477	0.877567	0.43578	0.452138	1359	58188	2.33553	1150	58188	1.97635	937	58188	1.6103	118	58188	0.202791	325	58188	0.558534	57	58188	0.0979583	77	58188	0.13233	71	58188	0.122018	377	58188	0.6479	203	58188	0.348869	88	58188	0.151234	848	58188	1.45735	117	58188	0.201072	53	58188	0.0910841
Oribacterium	0.0144207	0.151234	0.0599975	0.697524	0.447521	0.259504	0.153724	684	58188	1.1755	662	58188	1.13769	702	58188	1.20643	379	58188	0.651337	129	58188	0.221695	536	58188	0.921152	47	58188	0.0807727	108	58188	0.185605	316	58188	0.543067	59	58188	0.101395	150	58188	0.257785	235	58188	0.403863	109	58188	0.187324	144	58188	0.247474
Victivallis	0.902824	0.148828	0.0302116	0.132974	0.091359	0.151725	0.0868403	39	58188	0.0670241	30	58188	0.051557	30	58188	0.051557	40	58188	0.0687427	101	58188	0.173575	81	58188	0.139204	196	58188	0.336839	102	58188	0.175294	15	58188	0.0257785	104	58188	0.178731	112	58188	0.19248	16	58188	0.0274971	163	58188	0.280126	118	58188	0.202791
Flexilinea	0.0344662	0.142641	0.0706496	0.316216	0.128663	0.233725	0.0713154	309	58188	0.531037	126	58188	0.216539	141	58188	0.242318	67	58188	0.115144	137	58188	0.235444	262	58188	0.450265	222	58188	0.381522	208	58188	0.357462	154	58188	0.264659	143	58188	0.245755	216	58188	0.371211	86	58188	0.147797	102	58188	0.175294	152	58188	0.261222
Gimesia	0.117088	0.142641	0.0818081	0.0448976	0.0306397	0.134785	0.122354	19	58188	0.0326528	67	58188	0.115144	27	58188	0.0464013	18	58188	0.0309342	7	58188	0.01203	13	58188	0.0223414	19	58188	0.0326528	39	58188	0.0670241	230	58188	0.395271	61	58188	0.104833	22	58188	0.0378085	22	58188	0.0378085	15	58188	0.0257785	78	58188	0.134048
Schwartzia	0.125991	0.140235	0.0198225	0.0885062	0.0368692	0.0903475	0.0565291	39	58188	0.0670241	21	58188	0.0360899	52	58188	0.0893655	47	58188	0.0807727	68	58188	0.116863	46	58188	0.0790541	41	58188	0.0704613	98	58188	0.16842	20	58188	0.0343713	23	58188	0.0395271	44	58188	0.075617	25	58188	0.0429642	59	58188	0.101395	82	58188	0.140923
Paramuribaculum	0.130212	0.139204	0.0574937	0.0693872	0.0397314	0.0763535	0.0684712	48	58188	0.0824912	14	58188	0.0240599	35	58188	0.0601499	21	58188	0.0360899	33	58188	0.0567127	65	58188	0.111707	21	58188	0.0360899	86	58188	0.147797	9	58188	0.0154671	22	58188	0.0378085	20	58188	0.0343713	3	58188	0.0051557	89	58188	0.152952	53	58188	0.0910841
Thermovenabulum	0.891513	0.135423	0.0697611	0.128463	0.0826466	0.114899	0.0537481	99	58188	0.170138	177	58188	0.304186	101	58188	0.173575	66	58188	0.113425	19	58188	0.0326528	33	58188	0.0567127	71	58188	0.122018	32	58188	0.0549942	113	58188	0.194198	58	58188	0.0996769	44	58188	0.075617	115	58188	0.197635	28	58188	0.0481199	53	58188	0.0910841
Solobacterium	0.00782421	0.131642	0.0414114	0.258215	0.142405	0.418103	0.146632	267	58188	0.458857	231	58188	0.396989	246	58188	0.422768	156	58188	0.268097	74	58188	0.127174	58	58188	0.0996769	122	58188	0.209665	48	58188	0.0824912	404	58188	0.694301	299	58188	0.513852	135	58188	0.232007	277	58188	0.476043	160	58188	0.274971	230	58188	0.395271
Laedolimicola	0.963209	0.127861	0.0770608	0.125026	0.0502424	0.133557	0.0426113	129	58188	0.221695	71	58188	0.122018	77	58188	0.13233	69	58188	0.118581	23	58188	0.0395271	79	58188	0.135767	90	58188	0.154671	44	58188	0.075617	63	58188	0.10827	34	58188	0.0584313	113	58188	0.194198	72	58188	0.123737	98	58188	0.16842	97	58188	0.166701
Shuttleworthia	0.514693	0.127861	0.0676216	0.0874321	0.0432335	0.120054	0.0759534	43	58188	0.0738984	30	58188	0.051557	43	58188	0.0738984	33	58188	0.0567127	29	58188	0.0498385	45	58188	0.0773355	104	58188	0.178731	80	58188	0.137485	169	58188	0.290438	71	58188	0.122018	34	58188	0.0584313	33	58188	0.0567127	84	58188	0.14436	41	58188	0.0704613
Rarimicrobium	0.00241963	0.124424	0.046224	0.0560683	0.019136	0.0557307	0.0222156	55	58188	0.0945212	25	58188	0.0429642	21	58188	0.0360899	23	58188	0.0395271	29	58188	0.0498385	33	58188	0.0567127	29	58188	0.0498385	46	58188	0.0790541	31	58188	0.0532756	10	58188	0.0171857	31	58188	0.0532756	28	58188	0.0481199	54	58188	0.0928026	28	58188	0.0481199
Slackia	0.113564	0.123393	0.0387406	0.0296453	0.0182231	0.132821	0.147762	8	58188	0.0137485	33	58188	0.0567127	36	58188	0.0618684	15	58188	0.0257785	4	58188	0.00687427	15	58188	0.0257785	13	58188	0.0223414	14	58188	0.0240599	270	58188	0.464013	12	58188	0.0206228	25	58188	0.0429642	15	58188	0.0257785	110	58188	0.189042	26	58188	0.0446828
Intestinimonas	0.261931	0.115488	0.0236988	0.158753	0.0859367	0.18806	0.0633833	90	58188	0.154671	39	58188	0.0670241	50	58188	0.0859284	25	58188	0.0429642	107	58188	0.183887	107	58188	0.183887	184	58188	0.316216	137	58188	0.235444	190	58188	0.326528	89	58188	0.152952	69	58188	0.118581	84	58188	0.14436	97	58188	0.166701	121	58188	0.207947
Lachnoanaerobaculum	0.649796	0.115144	0.0572776	0.0801282	0.0637026	0.117599	0.102843	35	58188	0.0601499	16	58188	0.0274971	45	58188	0.0773355	38	58188	0.0653056	27	58188	0.0464013	20	58188	0.0343713	140	58188	0.240599	52	58188	0.0893655	184	58188	0.316216	43	58188	0.0738984	59	58188	0.101395	9	58188	0.0154671	29	58188	0.0498385	24	58188	0.0412456
Anaerotignum	0.55322	0.114113	0.0620553	0.0943064	0.0202514	0.088138	0.029734	54	58188	0.0928026	38	58188	0.0653056	48	58188	0.0824912	39	58188	0.0670241	64	58188	0.109988	74	58188	0.127174	62	58188	0.106551	60	58188	0.103114	50	58188	0.0859284	77	58188	0.13233	37	58188	0.063587	46	58188	0.0790541	30	58188	0.051557	77	58188	0.13233
Fannyhessea	0.0579151	0.113425	0.0602333	0.031149	0.0232235	0.0724253	0.066461	11	58188	0.0189042	20	58188	0.0343713	11	58188	0.0189042	5	58188	0.00859284	4	58188	0.00687427	15	58188	0.0257785	45	58188	0.0773355	34	58188	0.0584313	121	58188	0.207947	20	58188	0.0343713	24	58188	0.0412456	4	58188	0.00687427	36	58188	0.0618684	14	58188	0.0240599
Marinilabilia	0.313594	0.113425	0.0344914	0.168634	0.135032	0.0913296	0.0381797	25	58188	0.0429642	33	58188	0.0567127	36	58188	0.0618684	19	58188	0.0326528	175	58188	0.300749	134	58188	0.230288	116	58188	0.199354	247	58188	0.424486	9	58188	0.0154671	56	58188	0.0962398	73	58188	0.125455	39	58188	0.0670241	80	58188	0.137485	66	58188	0.113425
Dethiosulfatibacter	0.0119302	0.112738	0.0545801	0.034801	0.02286	0.0537666	0.0359871	24	58188	0.0412456	44	58188	0.075617	22	58188	0.0378085	33	58188	0.0567127	0	58188	0	11	58188	0.0189042	21	58188	0.0360899	7	58188	0.01203	70	58188	0.1203	37	58188	0.063587	40	58188	0.0687427	5	58188	0.00859284	15	58188	0.0257785	41	58188	0.0704613
Lachnospira	0.177744	0.111019	0.0179457	0.264445	0.100615	0.350833	0.308374	238	58188	0.409019	164	58188	0.281845	154	58188	0.264659	154	58188	0.264659	155	58188	0.266378	226	58188	0.388396	48	58188	0.0824912	92	58188	0.158108	96	58188	0.164982	41	58188	0.0704613	145	58188	0.249192	512	58188	0.879907	445	58188	0.764762	154	58188	0.264659
Sphaerochaeta	0.603023	0.110676	0.0902115	0.0691723	0.0600131	0.0950122	0.0587748	20	58188	0.0343713	24	58188	0.0412456	8	58188	0.0137485	4	58188	0.00687427	115	58188	0.197635	27	58188	0.0464013	65	58188	0.111707	59	58188	0.101395	21	58188	0.0360899	66	58188	0.113425	22	58188	0.0378085	12	58188	0.0206228	103	58188	0.177012	70	58188	0.1203
Brotonthovivens	0.0350694	0.109301	0.0331928	0.346936	0.204943	0.21433	0.0697947	240	58188	0.412456	175	58188	0.300749	150	58188	0.257785	486	58188	0.835224	101	58188	0.173575	135	58188	0.232007	91	58188	0.15639	237	58188	0.4073	192	58188	0.329965	93	58188	0.159827	136	58188	0.233725	139	58188	0.238881	153	58188	0.262941	101	58188	0.173575
Hydrogeniiclostridium	0.861727	0.107582	0.150351	0.0687427	0.124833	0.0935392	0.0846364	8	58188	0.0137485	13	58188	0.0223414	11	58188	0.0189042	5	58188	0.00859284	9	58188	0.0154671	33	58188	0.0567127	231	58188	0.396989	10	58188	0.0171857	30	58188	0.051557	69	58188	0.118581	18	58188	0.0309342	6	58188	0.0103114	7	58188	0.01203	117	58188	0.201072
Jutongia	0.280288	0.107582	0.0437557	0.101825	0.0632537	0.154671	0.0668823	62	58188	0.106551	77	58188	0.13233	52	58188	0.0893655	43	58188	0.0738984	13	58188	0.0223414	27	58188	0.0464013	143	58188	0.245755	57	58188	0.0979583	134	58188	0.230288	104	58188	0.178731	139	58188	0.238881	70	58188	0.1203	28	58188	0.0481199	50	58188	0.0859284
Holdemania	0.603731	0.10552	0.0652658	0.10204	0.0485852	0.134539	0.0683038	82	58188	0.140923	107	58188	0.183887	83	58188	0.142641	33	58188	0.0567127	19	58188	0.0326528	65	58188	0.111707	52	58188	0.0893655	34	58188	0.0584313	98	58188	0.16842	150	58188	0.257785	45	58188	0.0773355	30	58188	0.051557	42	58188	0.0721798	77	58188	0.13233
Anaerofilum	0.996055	0.10277	0.051309	0.105692	0.0472137	0.107042	0.11042	79	58188	0.135767	91	58188	0.15639	68	58188	0.116863	10	58188	0.0171857	32	58188	0.0549942	59	58188	0.101395	56	58188	0.0962398	97	58188	0.166701	216	58188	0.371211	21	58188	0.0360899	26	58188	0.0446828	58	58188	0.0996769	34	58188	0.0584313	56	58188	0.0962398
Sporomusa	0.499831	0.101052	0.0742723	0.0592906	0.0545425	0.0621139	0.054936	17	58188	0.0292156	6	58188	0.0103114	71	58188	0.122018	48	58188	0.0824912	7	58188	0.01203	97	58188	0.166701	14	58188	0.0240599	16	58188	0.0274971	4	58188	0.00687427	8	58188	0.0137485	22	58188	0.0378085	46	58188	0.0790541	20	58188	0.0343713	104	58188	0.178731
Mucilaginibacter	0.400881	0.100021	0.0485525	0.0745429	0.0890424	0.0439462	0.0333224	14	58188	0.0240599	6	58188	0.0103114	7	58188	0.01203	5	58188	0.00859284	60	58188	0.103114	61	58188	0.104833	26	58188	0.0446828	168	58188	0.288719	2	58188	0.00343713	4	58188	0.00687427	37	58188	0.063587	7	58188	0.01203	31	58188	0.0532756	47	58188	0.0807727
Subdivision3_genera_incertae_sedis	0.545949	0.0989895	0.074718	0.0938767	0.0660696	0.0594133	0.0535549	62	58188	0.106551	125	58188	0.214821	74	58188	0.127174	43	58188	0.0738984	18	58188	0.0309342	91	58188	0.15639	14	58188	0.0240599	10	58188	0.0171857	12	58188	0.0206228	106	58188	0.182168	33	58188	0.0567127	21	58188	0.0360899	34	58188	0.0584313	33	58188	0.0567127
Mageeibacillus	0.000201111	0.0986458	0.0341576	0.232651	0.058746	0.270552	0.0531595	175	58188	0.300749	142	58188	0.244037	98	58188	0.16842	64	58188	0.109988	148	58188	0.254348	158	58188	0.271534	159	58188	0.273252	139	58188	0.238881	184	58188	0.316216	203	58188	0.348869	142	58188	0.244037	109	58188	0.187324	128	58188	0.219977	179	58188	0.307624
Gallintestinimicrobium	0.38327	0.0976146	0.045305	0.0674538	0.0363016	0.0768445	0.0200568	74	58188	0.127174	66	58188	0.113425	50	58188	0.0859284	34	58188	0.0584313	7	58188	0.01203	24	58188	0.0412456	34	58188	0.0584313	25	58188	0.0429642	42	58188	0.0721798	66	58188	0.113425	34	58188	0.0584313	31	58188	0.0532756	36	58188	0.0618684	54	58188	0.0928026
Guopingia	0.979654	0.0917715	0.0699826	0.0977435	0.0327368	0.0955032	0.0418635	38	58188	0.0653056	69	58188	0.118581	56	58188	0.0962398	17	58188	0.0292156	78	58188	0.134048	67	58188	0.115144	73	58188	0.125455	57	58188	0.0979583	91	58188	0.15639	70	58188	0.1203	37	58188	0.063587	84	58188	0.14436	24	58188	0.0412456	33	58188	0.0567127
Raoultibacter	0.895175	0.0914278	0.0426177	0.0975287	0.0473523	0.10336	0.0265037	67	58188	0.115144	106	58188	0.182168	84	58188	0.14436	40	58188	0.0687427	26	58188	0.0446828	45	58188	0.0773355	66	58188	0.113425	20	58188	0.0343713	88	58188	0.151234	35	58188	0.0601499	69	58188	0.118581	51	58188	0.0876469	67	58188	0.115144	54	58188	0.0928026
Mediterraneibacter	0.0773487	0.0907404	0.0240452	0.219117	0.124478	0.134294	0.0694354	152	58188	0.261222	145	58188	0.249192	94	58188	0.161545	300	58188	0.51557	46	58188	0.0790541	107	58188	0.183887	89	58188	0.152952	87	58188	0.149515	99	58188	0.170138	83	58188	0.142641	76	58188	0.130611	157	58188	0.269815	36	58188	0.0618684	72	58188	0.123737
Staphylococcus	0.241603	0.0883344	0.150107	0.0378085	0.0188063	0.134785	0.105636	33	58188	0.0567127	24	58188	0.0412456	30	58188	0.051557	12	58188	0.0206228	1	58188	0.00171857	32	58188	0.0549942	14	58188	0.0240599	30	58188	0.051557	73	58188	0.125455	63	58188	0.10827	21	58188	0.0360899	219	58188	0.376366	91	58188	0.15639	50	58188	0.0859284
Berryella	0.111622	0.0842098	0.076849	0.0199783	0.0159359	0.0419821	0.0408639	13	58188	0.0223414	17	58188	0.0292156	32	58188	0.0549942	14	58188	0.0240599	1	58188	0.00171857	5	58188	0.00859284	4	58188	0.00687427	7	58188	0.01203	70	58188	0.1203	1	58188	0.00171857	6	58188	0.0103114	9	58188	0.0154671	16	58188	0.0274971	19	58188	0.0326528
Muricoprocola	0.0426861	0.0838661	0.0411223	0.0356603	0.0166344	0.0527846	0.0274312	34	58188	0.0584313	19	58188	0.0326528	20	58188	0.0343713	23	58188	0.0395271	0	58188	0	20	58188	0.0343713	18	58188	0.0309342	32	58188	0.0549942	26	58188	0.0446828	56	58188	0.0962398	44	58188	0.075617	9	58188	0.0154671	10	58188	0.0171857	37	58188	0.063587
Anaerovibrio	0.172785	0.0831787	0.0408802	0.170568	0.0723574	0.147306	0.0880754	169	58188	0.290438	117	58188	0.201072	88	58188	0.151234	147	58188	0.252629	93	58188	0.159827	94	58188	0.161545	33	58188	0.0567127	53	58188	0.0910841	73	58188	0.125455	33	58188	0.0567127	201	58188	0.345432	47	58188	0.0807727	81	58188	0.139204	100	58188	0.171857
Streptococcus	0.56667	0.0828349	0.0808085	0.28206	0.510622	0.124719	0.10536	35	58188	0.0601499	65	58188	0.111707	34	58188	0.0584313	942	58188	1.61889	21	58188	0.0360899	160	58188	0.274971	37	58188	0.063587	19	58188	0.0326528	83	58188	0.142641	17	58188	0.0292156	34	58188	0.0584313	193	58188	0.331684	121	58188	0.207947	54	58188	0.0928026
Adlercreutzia	0.0830259	0.0821475	0.0282055	0.0212673	0.0195369	0.0729164	0.0728597	10	58188	0.0171857	10	58188	0.0171857	41	58188	0.0704613	13	58188	0.0223414	6	58188	0.0103114	2	58188	0.00343713	5	58188	0.00859284	12	58188	0.0206228	139	58188	0.238881	14	58188	0.0240599	17	58188	0.0292156	8	58188	0.0137485	26	58188	0.0446828	34	58188	0.0584313
Mailhella	0.96899	0.0797415	0.0277664	0.0751873	0.0335423	0.0837188	0.0930919	44	58188	0.075617	72	58188	0.123737	17	58188	0.0292156	14	58188	0.0240599	45	58188	0.0773355	37	58188	0.063587	65	58188	0.111707	56	58188	0.0962398	178	58188	0.305905	44	58188	0.075617	9	58188	0.0154671	11	58188	0.0189042	38	58188	0.0653056	27	58188	0.0464013
Mogibacterium	0.529648	0.0793978	0.046654	0.0534904	0.0395871	0.089611	0.0786283	41	58188	0.0704613	27	58188	0.0464013	82	58188	0.140923	21	58188	0.0360899	11	58188	0.0189042	15	58188	0.0257785	45	58188	0.0773355	7	58188	0.01203	160	58188	0.274971	37	58188	0.063587	48	58188	0.0824912	27	58188	0.0464013	11	58188	0.0189042	31	58188	0.0532756
Gp14	0.204906	0.0783667	0.0576025	0.0307194	0.016848	0.0567127	0.0485737	27	58188	0.0464013	9	58188	0.0154671	19	58188	0.0326528	10	58188	0.0171857	16	58188	0.0274971	9	58188	0.0154671	14	58188	0.0240599	39	58188	0.0670241	8	58188	0.0137485	7	58188	0.01203	34	58188	0.0584313	5	58188	0.00859284	36	58188	0.0618684	52	58188	0.0893655
Marseilla	0.277111	0.0776792	0.0315656	0.10827	0.0899215	0.051557	0.0250733	66	58188	0.113425	37	58188	0.063587	25	58188	0.0429642	177	58188	0.304186	115	58188	0.197635	30	58188	0.051557	13	58188	0.0223414	41	58188	0.0704613	8	58188	0.0137485	30	58188	0.051557	48	58188	0.0824912	11	58188	0.0189042	28	58188	0.0481199	44	58188	0.075617
Zhouia	0.29191	0.0776792	0.0706613	0.0272823	0.0214896	0.0729164	0.0770806	15	58188	0.0257785	1	58188	0.00171857	9	58188	0.0154671	5	58188	0.00859284	26	58188	0.0446828	11	58188	0.0189042	17	58188	0.0292156	43	58188	0.0738984	131	58188	0.225132	7	58188	0.01203	12	58188	0.0206228	2	58188	0.00343713	75	58188	0.128893	10	58188	0.0171857
Anthropogastromicrobium	0.296606	0.0759607	0.0400599	0.131685	0.0730337	0.140677	0.0745121	138	58188	0.237162	139	58188	0.238881	94	58188	0.161545	34	58188	0.0584313	30	58188	0.051557	28	58188	0.0481199	67	58188	0.115144	83	58188	0.142641	182	58188	0.312779	85	58188	0.146078	61	58188	0.104833	80	58188	0.137485	37	58188	0.063587	68	58188	0.116863
Faecalicatena	0.688561	0.0738984	0.0152556	0.0693872	0.0542707	0.0878924	0.0272106	38	58188	0.0653056	112	58188	0.19248	20	58188	0.0343713	7	58188	0.01203	12	58188	0.0206228	46	58188	0.0790541	59	58188	0.101395	29	58188	0.0498385	67	58188	0.115144	40	58188	0.0687427	66	58188	0.113425	41	58188	0.0704613	27	58188	0.0464013	72	58188	0.123737
Massiliprevotella	0.798874	0.073211	0.0699573	0.0547793	0.0439449	0.0525391	0.0445963	35	58188	0.0601499	3	58188	0.0051557	18	58188	0.0309342	26	58188	0.0446828	62	58188	0.106551	14	58188	0.0240599	14	58188	0.0240599	83	58188	0.142641	74	58188	0.127174	9	58188	0.0154671	7	58188	0.01203	9	58188	0.0154671	27	58188	0.0464013	22	58188	0.0378085
Sedimentibacter	0.765298	0.073211	0.0386521	0.105477	0.110347	0.0810182	0.0477805	47	58188	0.0807727	228	58188	0.391833	51	58188	0.0876469	35	58188	0.0601499	12	58188	0.0206228	39	58188	0.0670241	52	58188	0.0893655	27	58188	0.0464013	61	58188	0.104833	51	58188	0.0876469	36	58188	0.0618684	107	58188	0.183887	21	58188	0.0360899	26	58188	0.0446828
Petrimonas	0.212244	0.0714924	0.120072	0.165197	0.106192	0.341749	0.378107	123	58188	0.211384	9	58188	0.0154671	19	58188	0.0326528	54	58188	0.0928026	134	58188	0.230288	145	58188	0.249192	86	58188	0.147797	199	58188	0.341995	31	58188	0.0532756	52	58188	0.0893655	123	58188	0.211384	82	58188	0.140923	85	58188	0.146078	688	58188	1.18237
Zongyangia	0.513172	0.0694301	0.0981397	0.0345862	0.0188933	0.0363354	0.0181511	20	58188	0.0343713	5	58188	0.00859284	29	58188	0.0498385	16	58188	0.0274971	16	58188	0.0274971	6	58188	0.0103114	37	58188	0.063587	32	58188	0.0549942	32	58188	0.0549942	23	58188	0.0395271	6	58188	0.0103114	19	58188	0.0326528	6	58188	0.0103114	32	58188	0.0549942
Pantoea	0.166782	0.0690864	0.0379395	0.299246	0.254471	1.14113	1.55663	412	58188	0.70805	339	58188	0.582594	304	58188	0.522444	51	58188	0.0876469	185	58188	0.317935	15	58188	0.0257785	39	58188	0.0670241	48	58188	0.0824912	818	58188	1.40579	188	58188	0.323091	59	58188	0.101395	2803	58188	4.81714	389	58188	0.668523	60	58188	0.103114
Pyramidobacter	0.397294	0.0687427	0.0293266	0.0421049	0.0211879	0.0616229	0.0455935	20	58188	0.0343713	37	58188	0.063587	21	58188	0.0360899	11	58188	0.0189042	25	58188	0.0429642	11	58188	0.0189042	21	58188	0.0360899	50	58188	0.0859284	15	58188	0.0257785	11	58188	0.0189042	15	58188	0.0257785	15	58188	0.0257785	51	58188	0.0876469	63	58188	0.10827
Anaerostipes	0.367643	0.0680553	0.0247044	0.074328	0.0453206	0.103114	0.0491866	40	58188	0.0687427	90	58188	0.154671	42	58188	0.0721798	27	58188	0.0464013	11	58188	0.0189042	23	58188	0.0395271	82	58188	0.140923	31	58188	0.0532756	92	58188	0.158108	63	58188	0.10827	63	58188	0.10827	107	58188	0.183887	25	58188	0.0429642	37	58188	0.063587
Aminipila	0.45351	0.0670241	0.0238875	0.0416753	0.0240868	0.0542576	0.0433587	22	58188	0.0378085	30	58188	0.051557	45	58188	0.0773355	12	58188	0.0206228	8	58188	0.0137485	15	58188	0.0257785	47	58188	0.0807727	15	58188	0.0257785	90	58188	0.154671	36	58188	0.0618684	22	58188	0.0378085	18	58188	0.0309342	8	58188	0.0137485	18	58188	0.0309342
Prevotellamassilia	0.706557	0.0666804	0.0411223	0.0496236	0.0409621	0.0468923	0.0358579	7	58188	0.01203	4	58188	0.00687427	20	58188	0.0343713	8	58188	0.0137485	71	58188	0.122018	24	58188	0.0412456	35	58188	0.0601499	62	58188	0.106551	12	58188	0.0206228	16	58188	0.0274971	23	58188	0.0395271	13	58188	0.0223414	32	58188	0.0549942	19	58188	0.0326528
Schaedlerella	0.725348	0.065993	0.0283767	0.083995	0.0334618	0.0736529	0.0451938	64	58188	0.109988	53	58188	0.0910841	45	58188	0.0773355	35	58188	0.0601499	14	58188	0.0240599	36	58188	0.0618684	80	58188	0.137485	64	58188	0.109988	101	58188	0.173575	40	58188	0.0687427	48	58188	0.0824912	10	58188	0.0171857	36	58188	0.0618684	26	58188	0.0446828
Alkaliphilus	0.0707782	0.0656493	0.0315656	0.185176	0.132733	0.219977	0.0890723	146	58188	0.250911	230	58188	0.395271	99	58188	0.170138	30	58188	0.051557	34	58188	0.0584313	59	58188	0.101395	222	58188	0.381522	42	58188	0.0721798	109	58188	0.187324	139	58188	0.238881	100	58188	0.171857	200	58188	0.343713	67	58188	0.115144	205	58188	0.352306
Desulfuromonas	0.854877	0.0642744	0.0245123	0.0706761	0.0414816	0.0807727	0.0638618	37	58188	0.063587	66	58188	0.113425	50	58188	0.0859284	9	58188	0.0154671	41	58188	0.0704613	86	58188	0.147797	18	58188	0.0309342	22	58188	0.0378085	126	58188	0.216539	64	58188	0.109988	13	58188	0.0223414	44	58188	0.075617	30	58188	0.051557	46	58188	0.0790541
Suipraeoptans	0.0235269	0.0639307	0.0378616	0.0234155	0.0130015	0.0297067	0.0136164	16	58188	0.0274971	28	58188	0.0481199	17	58188	0.0292156	14	58188	0.0240599	0	58188	0	7	58188	0.01203	15	58188	0.0257785	12	58188	0.0206228	28	58188	0.0481199	18	58188	0.0309342	26	58188	0.0446828	4	58188	0.00687427	11	58188	0.0189042	13	58188	0.0223414
Anaerobutyricum	0.297884	0.0632433	0.0157659	0.118366	0.0744431	0.133557	0.0885055	64	58188	0.109988	72	58188	0.123737	59	58188	0.101395	60	58188	0.103114	22	58188	0.0378085	36	58188	0.0618684	176	58188	0.302468	62	58188	0.106551	190	58188	0.326528	60	58188	0.103114	76	58188	0.130611	16	58188	0.0274971	45	58188	0.0773355	59	58188	0.101395
Oscillibacter	0.0492088	0.0618684	0.0219547	0.146723	0.0786042	0.134785	0.0263188	100	58188	0.171857	32	58188	0.0549942	65	58188	0.111707	40	58188	0.0687427	90	58188	0.154671	84	58188	0.14436	191	58188	0.328246	81	58188	0.139204	101	58188	0.173575	62	58188	0.106551	78	58188	0.134048	56	58188	0.0962398	95	58188	0.163264	85	58188	0.146078
Papillibacter	0.229153	0.0604936	0.0336488	0.11364	0.0740852	0.0763535	0.0212844	51	58188	0.0876469	34	58188	0.0584313	50	58188	0.0859284	10	58188	0.0171857	114	58188	0.195917	53	58188	0.0910841	63	58188	0.10827	154	58188	0.264659	69	58188	0.118581	51	58188	0.0876469	47	58188	0.0807727	34	58188	0.0584313	46	58188	0.0790541	32	58188	0.0549942
Colidextribacter	0.265886	0.0601499	0.0206514	0.102899	0.0534101	0.0942757	0.037869	104	58188	0.178731	119	58188	0.20451	39	58188	0.0670241	27	58188	0.0464013	46	58188	0.0790541	54	58188	0.0928026	52	58188	0.0893655	38	58188	0.0653056	84	58188	0.14436	63	58188	0.10827	33	58188	0.0567127	82	58188	0.140923	57	58188	0.0979583	21	58188	0.0360899
Lawsonibacter	0.551868	0.0601499	0.0230057	0.0736836	0.034376	0.0788086	0.0184508	60	58188	0.103114	24	58188	0.0412456	29	58188	0.0498385	22	58188	0.0378085	24	58188	0.0412456	66	58188	0.113425	75	58188	0.128893	43	58188	0.0738984	40	58188	0.0687427	53	58188	0.0910841	46	58188	0.0790541	34	58188	0.0584313	66	58188	0.113425	33	58188	0.0567127
Kineothrix	0.768367	0.0584313	0.0400098	0.0526311	0.0182066	0.0643235	0.0282069	26	58188	0.0446828	58	58188	0.0996769	29	58188	0.0498385	22	58188	0.0378085	25	58188	0.0429642	29	58188	0.0498385	29	58188	0.0498385	27	58188	0.0464013	27	58188	0.0464013	35	58188	0.0601499	41	58188	0.0704613	8	58188	0.0137485	36	58188	0.0618684	51	58188	0.0876469
Natronogracilivirga	0.232308	0.0584313	0.04587	0.0564979	0.0472015	0.0225869	0.0112292	13	58188	0.0223414	9	58188	0.0154671	9	58188	0.0154671	80	58188	0.137485	20	58188	0.0343713	29	58188	0.0498385	78	58188	0.134048	25	58188	0.0429642	2	58188	0.00343713	21	58188	0.0360899	19	58188	0.0326528	11	58188	0.0189042	9	58188	0.0154671	20	58188	0.0343713
Spartobacteria_genera_incertae_sedis	0.71453	0.0577439	0.0169991	0.0483347	0.0309275	0.0441917	0.0252195	32	58188	0.0549942	10	58188	0.0171857	13	58188	0.0223414	30	58188	0.051557	14	58188	0.0240599	64	58188	0.109988	47	58188	0.0807727	15	58188	0.0257785	60	58188	0.103114	30	58188	0.051557	20	58188	0.0343713	18	58188	0.0309342	16	58188	0.0274971	16	58188	0.0274971
Dorea	0.135945	0.056369	0.0280795	0.0206228	0.0123928	0.0621139	0.0572232	19	58188	0.0326528	6	58188	0.0103114	17	58188	0.0292156	15	58188	0.0257785	4	58188	0.00687427	4	58188	0.00687427	24	58188	0.0412456	7	58188	0.01203	36	58188	0.0618684	9	58188	0.0154671	41	58188	0.0704613	9	58188	0.0154671	6	58188	0.0103114	43	58188	0.0738984
Sphingobacterium	0.130866	0.056369	0.0163544	0.103114	0.0596135	0.23348	0.228521	116	58188	0.199354	96	58188	0.164982	87	58188	0.149515	8	58188	0.0137485	41	58188	0.0704613	30	58188	0.051557	38	58188	0.0653056	64	58188	0.109988	135	58188	0.232007	84	58188	0.14436	35	58188	0.0601499	454	58188	0.78023	60	58188	0.103114	93	58188	0.159827
Saccharibacteria_genera_incertae_sedis	0.102922	0.0549942	0.0271947	0.729962	0.713182	1.04145	0.873118	453	58188	0.778511	1402	58188	2.40943	312	58188	0.536193	183	58188	0.314498	95	58188	0.163264	185	58188	0.317935	685	58188	1.17722	83	58188	0.142641	1391	58188	2.39053	1137	58188	1.95401	141	58188	0.242318	1007	58188	1.7306	180	58188	0.309342	260	58188	0.446828
Muribaculum	0.040498	0.0543067	0.0464153	0.0148226	0.00708258	0.0171857	0.0115102	16	58188	0.0274971	2	58188	0.00343713	4	58188	0.00687427	10	58188	0.0171857	11	58188	0.0189042	8	58188	0.0137485	7	58188	0.01203	11	58188	0.0189042	11	58188	0.0189042	4	58188	0.00687427	8	58188	0.0137485	2	58188	0.00343713	13	58188	0.0223414	8	58188	0.0137485
Pectinatus	0.142714	0.053963	0.0202061	0.0253489	0.0150742	0.0341258	0.0293155	23	58188	0.0395271	5	58188	0.00859284	18	58188	0.0309342	16	58188	0.0274971	6	58188	0.0103114	32	58188	0.0549942	9	58188	0.0154671	9	58188	0.0154671	3	58188	0.0051557	18	58188	0.0309342	15	58188	0.0257785	15	58188	0.0257785	7	58188	0.01203	59	58188	0.101395
Odoribacter	0.568281	0.0519007	0.0194555	0.0758318	0.0609997	0.0503295	0.0406242	20	58188	0.0343713	8	58188	0.0137485	25	58188	0.0429642	19	58188	0.0326528	74	58188	0.127174	15	58188	0.0257785	102	58188	0.175294	90	58188	0.154671	7	58188	0.01203	78	58188	0.134048	45	58188	0.0773355	9	58188	0.0154671	34	58188	0.0584313	14	58188	0.0240599
Akkermansia	0.904047	0.0505259	0.0274455	0.0605795	0.0453776	0.0574493	0.0293217	39	58188	0.0670241	6	58188	0.0103114	48	58188	0.0824912	30	58188	0.051557	24	58188	0.0412456	14	58188	0.0240599	24	58188	0.0412456	97	58188	0.166701	21	58188	0.0360899	31	58188	0.0532756	27	58188	0.0464013	24	58188	0.0412456	48	58188	0.0824912	15	58188	0.0257785
Methanomassiliicoccus	0.1542	0.0501822	0.0622435	0.0126744	0.0102733	0.0144851	0.00680376	0	58188	0	5	58188	0.00859284	3	58188	0.0051557	1	58188	0.00171857	13	58188	0.0223414	15	58188	0.0257785	16	58188	0.0274971	6	58188	0.0103114	9	58188	0.0154671	14	58188	0.0240599	4	58188	0.00687427	3	58188	0.0051557	6	58188	0.0103114	13	58188	0.0223414
Thermicanus	0.295239	0.0498385	0.0265128	0.0307194	0.0148444	0.0311797	0.022074	24	58188	0.0412456	27	58188	0.0464013	29	58188	0.0498385	11	58188	0.0189042	6	58188	0.0103114	9	58188	0.0154671	25	58188	0.0429642	12	58188	0.0206228	46	58188	0.0790541	5	58188	0.00859284	14	58188	0.0240599	19	58188	0.0326528	8	58188	0.0137485	11	58188	0.0189042
Guggenheimella	0.105539	0.0484636	0.0315281	0.0133189	0.0066421	0.0459103	0.0425816	13	58188	0.0223414	11	58188	0.0189042	9	58188	0.0154671	3	58188	0.0051557	6	58188	0.0103114	12	58188	0.0206228	6	58188	0.0103114	2	58188	0.00343713	84	58188	0.14436	2	58188	0.00343713	22	58188	0.0378085	29	58188	0.0498385	22	58188	0.0378085	10	58188	0.0171857
Roseimaritima	0.79309	0.0477762	0.0219654	0.0401715	0.0419462	0.0346169	0.0159487	19	58188	0.0326528	79	58188	0.135767	44	58188	0.075617	3	58188	0.0051557	2	58188	0.00343713	9	58188	0.0154671	19	58188	0.0326528	12	58188	0.0206228	36	58188	0.0618684	27	58188	0.0464013	10	58188	0.0171857	14	58188	0.0240599	8	58188	0.0137485	23	58188	0.0395271
Mesosutterella	0.0735085	0.0470887	0.0250369	0.0165412	0.014832	0.0230779	0.0221585	9	58188	0.0154671	4	58188	0.00687427	0	58188	0	9	58188	0.0154671	3	58188	0.0051557	9	58188	0.0154671	13	58188	0.0223414	30	58188	0.051557	2	58188	0.00343713	10	58188	0.0171857	8	58188	0.0137485	1	58188	0.00171857	18	58188	0.0309342	13	58188	0.0223414
Clostridium_sensu_stricto	0.0411934	0.0464013	0.014542	0.0885062	0.0471981	0.121282	0.0493737	72	58188	0.123737	82	58188	0.140923	35	58188	0.0601499	14	58188	0.0240599	41	58188	0.0704613	48	58188	0.0824912	97	58188	0.166701	23	58188	0.0395271	39	58188	0.0670241	91	58188	0.15639	70	58188	0.1203	25	58188	0.0429642	70	58188	0.1203	117	58188	0.201072
Stecheria	0.162279	0.0464013	0.0264458	0.0790541	0.0701041	0.116617	0.0519031	57	58188	0.0979583	113	58188	0.194198	81	58188	0.139204	86	58188	0.147797	4	58188	0.00687427	11	58188	0.0189042	8	58188	0.0137485	8	58188	0.0137485	83	58188	0.142641	66	58188	0.113425	71	58188	0.122018	119	58188	0.20451	12	58188	0.0206228	75	58188	0.128893
Curtanaerobium	0.0553163	0.0453702	0.0143621	0.0148226	0.0140392	0.0351079	0.0274795	8	58188	0.0137485	8	58188	0.0137485	29	58188	0.0498385	2	58188	0.00343713	9	58188	0.0154671	1	58188	0.00171857	7	58188	0.01203	5	58188	0.00859284	40	58188	0.0687427	7	58188	0.01203	9	58188	0.0154671	12	58188	0.0206228	9	58188	0.0154671	16	58188	0.0274971
Lactonifactor	0.844611	0.0453702	0.0348255	0.0577868	0.0485472	0.0599043	0.0368297	65	58188	0.111707	49	58188	0.0842098	49	58188	0.0842098	78	58188	0.134048	1	58188	0.00171857	6	58188	0.0103114	16	58188	0.0274971	5	58188	0.00859284	20	58188	0.0343713	51	58188	0.0876469	72	58188	0.123737	9	58188	0.0154671	15	58188	0.0257785	50	58188	0.0859284
Gp20	0.279932	0.0436516	0.0411395	0.0152523	0.0196029	0.0238144	0.0238385	4	58188	0.00687427	0	58188	0	14	58188	0.0240599	7	58188	0.01203	5	58188	0.00859284	4	58188	0.00687427	37	58188	0.063587	0	58188	0	46	58188	0.0790541	5	58188	0.00859284	3	58188	0.0051557	16	58188	0.0274971	14	58188	0.0240599	8	58188	0.0137485
Roseburia	0.661299	0.0436516	0.0190629	0.0532756	0.021153	0.0549942	0.0207045	51	58188	0.0876469	23	58188	0.0395271	40	58188	0.0687427	28	58188	0.0481199	14	58188	0.0240599	45	58188	0.0773355	29	58188	0.0498385	18	58188	0.0309342	50	58188	0.0859284	34	58188	0.0584313	25	58188	0.0429642	43	58188	0.0738984	35	58188	0.0601499	27	58188	0.0464013
Actinomyces	0.000336839	0.041933	0.0217818	0.00322231	0.00234342	0.0127665	0.00940658	0	58188	0	1	58188	0.00171857	0	58188	0	4	58188	0.00687427	2	58188	0.00343713	2	58188	0.00343713	3	58188	0.0051557	3	58188	0.0051557	5	58188	0.00859284	8	58188	0.0137485	1	58188	0.00171857	0	58188	0	16	58188	0.0274971	9	58188	0.0154671
Agathobacter	0.0540845	0.0415893	0.0466793	0.114285	0.0612326	0.063096	0.0262362	72	58188	0.123737	54	58188	0.0928026	49	58188	0.0842098	76	58188	0.130611	41	58188	0.0704613	154	58188	0.264659	34	58188	0.0584313	52	58188	0.0893655	22	58188	0.0378085	17	58188	0.0292156	48	58188	0.0824912	41	58188	0.0704613	62	58188	0.106551	44	58188	0.075617
Flavobacterium	0.301219	0.0405582	0.021863	0.139419	0.0988828	0.501331	0.838175	175	58188	0.300749	154	58188	0.264659	130	58188	0.223414	22	58188	0.0378085	52	58188	0.0893655	28	58188	0.0481199	49	58188	0.0842098	39	58188	0.0670241	261	58188	0.448546	86	58188	0.147797	42	58188	0.0721798	1474	58188	2.53317	66	58188	0.113425	51	58188	0.0876469
Pseudoprevotella	0.10595	0.0391833	0.0174043	0.0655204	0.0473577	0.026024	0.00915985	28	58188	0.0481199	24	58188	0.0412456	81	58188	0.139204	3	58188	0.0051557	74	58188	0.127174	11	58188	0.0189042	24	58188	0.0412456	60	58188	0.103114	9	58188	0.0154671	8	58188	0.0137485	17	58188	0.0292156	18	58188	0.0309342	21	58188	0.0360899	11	58188	0.0189042
Persicobacter	0.17855	0.0388396	0.0170338	0.199998	0.226742	0.0790541	0.043593	18	58188	0.0309342	16	58188	0.0274971	49	58188	0.0842098	6	58188	0.0103114	400	58188	0.687427	72	58188	0.123737	111	58188	0.190761	259	58188	0.445109	14	58188	0.0240599	27	58188	0.0464013	39	58188	0.0670241	45	58188	0.0773355	99	58188	0.170138	60	58188	0.103114
Caloramator	0.165684	0.0384959	0.0130702	0.0238451	0.00756157	0.0270061	0.01517	13	58188	0.0223414	11	58188	0.0189042	16	58188	0.0274971	18	58188	0.0309342	8	58188	0.0137485	9	58188	0.0154671	22	58188	0.0378085	14	58188	0.0240599	31	58188	0.0532756	19	58188	0.0326528	23	58188	0.0395271	6	58188	0.0103114	7	58188	0.01203	7	58188	0.01203
Orenia	0.956964	0.0384959	0.00765486	0.0378085	0.0136136	0.0414911	0.0353568	22	58188	0.0378085	34	58188	0.0584313	6	58188	0.0103114	21	58188	0.0360899	20	58188	0.0343713	28	58188	0.0481199	17	58188	0.0292156	28	58188	0.0481199	71	58188	0.122018	7	58188	0.01203	30	58188	0.051557	6	58188	0.0103114	16	58188	0.0274971	19	58188	0.0326528
Bacilliculturomica	0.125138	0.0378085	0.0161947	0.0713205	0.0385722	0.0451738	0.0175191	43	58188	0.0738984	87	58188	0.149515	24	58188	0.0412456	14	58188	0.0240599	24	58188	0.0412456	60	58188	0.103114	29	58188	0.0498385	51	58188	0.0876469	23	58188	0.0395271	45	58188	0.0773355	21	58188	0.0360899	24	58188	0.0412456	15	58188	0.0257785	38	58188	0.0653056
Atopobium	0.196813	0.0371211	0.0195826	0.0126744	0.0142997	0.0358444	0.0363802	2	58188	0.00343713	15	58188	0.0257785	7	58188	0.01203	5	58188	0.00859284	0	58188	0	1	58188	0.00171857	26	58188	0.0446828	3	58188	0.0051557	21	58188	0.0360899	10	58188	0.0171857	12	58188	0.0206228	2	58188	0.00343713	16	58188	0.0274971	14	58188	0.0240599
Fuerstiella	0.00165529	0.0364336	0.0131063	0.00708909	0.00604178	0.013503	0.0136385	2	58188	0.00343713	3	58188	0.0051557	0	58188	0	2	58188	0.00343713	3	58188	0.0051557	7	58188	0.01203	4	58188	0.00687427	12	58188	0.0206228	13	58188	0.0223414	3	58188	0.0051557	3	58188	0.0051557	0	58188	0	25	58188	0.0429642	6	58188	0.0103114
Hominimerdicola	0.287226	0.0364336	0.0308463	0.231147	0.356047	0.0557307	0.0376391	68	58188	0.116863	5	58188	0.00859284	672	58188	1.15488	29	58188	0.0498385	58	58188	0.0996769	38	58188	0.0653056	53	58188	0.0910841	153	58188	0.262941	38	58188	0.0653056	3	58188	0.0051557	54	58188	0.0928026	68	58188	0.116863	31	58188	0.0532756	27	58188	0.0464013
Parolsenella	0.0902405	0.0357462	0.0397491	0.00558534	0.00484182	0.011539	0.0114261	4	58188	0.00687427	0	58188	0	2	58188	0.00343713	2	58188	0.00343713	2	58188	0.00343713	4	58188	0.00687427	2	58188	0.00343713	10	58188	0.0171857	3	58188	0.0051557	3	58188	0.0051557	1	58188	0.00171857	1	58188	0.00171857	8	58188	0.0137485	10	58188	0.0171857
Anaerophaga	0.28061	0.0350588	0.0264146	0.0178301	0.0142997	0.0218504	0.0102174	7	58188	0.01203	3	58188	0.0051557	4	58188	0.00687427	3	58188	0.0051557	28	58188	0.0481199	6	58188	0.0103114	16	58188	0.0274971	16	58188	0.0274971	3	58188	0.0051557	10	58188	0.0171857	18	58188	0.0309342	6	58188	0.0103114	15	58188	0.0257785	19	58188	0.0326528
Carboxydocella	0.179229	0.0343713	0.0253277	0.0745429	0.0363644	0.0537666	0.03574	25	58188	0.0429642	80	58188	0.137485	71	58188	0.122018	13	58188	0.0223414	37	58188	0.063587	48	58188	0.0824912	42	58188	0.0721798	31	58188	0.0532756	13	58188	0.0223414	78	58188	0.134048	15	58188	0.0257785	21	58188	0.0360899	24	58188	0.0412456	40	58188	0.0687427
Velocimicrobium	0.770157	0.0340276	0.018586	0.026423	0.0202605	0.0287246	0.0103406	4	58188	0.00687427	31	58188	0.0532756	31	58188	0.0532756	24	58188	0.0412456	0	58188	0	8	58188	0.0137485	20	58188	0.0343713	5	58188	0.00859284	24	58188	0.0412456	21	58188	0.0360899	13	58188	0.0223414	23	58188	0.0395271	7	58188	0.01203	18	58188	0.0309342
Tenuifilum	0.246816	0.0333402	0.0198225	0.018045	0.0149328	0.0166947	0.0151422	8	58188	0.0137485	2	58188	0.00343713	4	58188	0.00687427	7	58188	0.01203	26	58188	0.0446828	2	58188	0.00343713	12	58188	0.0206228	23	58188	0.0395271	1	58188	0.00171857	3	58188	0.0051557	14	58188	0.0240599	0	58188	0	18	58188	0.0309342	7	58188	0.01203
Jonquetella	0.130131	0.0329965	0.012833	0.0794837	0.0326047	0.100168	0.075738	33	58188	0.0567127	60	58188	0.103114	36	58188	0.0618684	15	58188	0.0257785	40	58188	0.0687427	57	58188	0.0979583	82	58188	0.140923	47	58188	0.0807727	162	58188	0.278408	66	58188	0.113425	43	58188	0.0738984	46	58188	0.0790541	35	58188	0.0601499	25	58188	0.0429642
Desulfococcus	0.787312	0.0326528	0.041217	0.0320083	0.0203876	0.0230779	0.0153948	19	58188	0.0326528	5	58188	0.00859284	19	58188	0.0326528	7	58188	0.01203	12	58188	0.0206228	39	58188	0.0670241	36	58188	0.0618684	12	58188	0.0206228	8	58188	0.0137485	9	58188	0.0154671	19	58188	0.0326528	22	58188	0.0378085	7	58188	0.01203	28	58188	0.0481199
Bullifex	0.972329	0.0319654	0.0193092	0.0285712	0.0290247	0.0292156	0.0197021	8	58188	0.0137485	11	58188	0.0189042	3	58188	0.0051557	1	58188	0.00171857	22	58188	0.0378085	9	58188	0.0154671	57	58188	0.0979583	22	58188	0.0378085	4	58188	0.00687427	20	58188	0.0343713	5	58188	0.00859284	4	58188	0.00687427	30	58188	0.051557	25	58188	0.0429642
Faecalimonas	0.68687	0.0319654	0.0160334	0.0330824	0.0174786	0.0262695	0.0080981	39	58188	0.0670241	11	58188	0.0189042	29	58188	0.0498385	26	58188	0.0446828	10	58188	0.0171857	14	58188	0.0240599	9	58188	0.0154671	16	58188	0.0274971	21	58188	0.0360899	7	58188	0.01203	17	58188	0.0292156	12	58188	0.0206228	12	58188	0.0206228	20	58188	0.0343713
Howardella	0.994118	0.0316216	0.0148076	0.0309342	0.0132006	0.0306887	0.0136694	20	58188	0.0343713	10	58188	0.0171857	18	58188	0.0309342	22	58188	0.0378085	15	58188	0.0257785	15	58188	0.0257785	35	58188	0.0601499	9	58188	0.0154671	23	58188	0.0395271	6	58188	0.0103114	29	58188	0.0498385	10	58188	0.0171857	18	58188	0.0309342	13	58188	0.0223414
Stieleria	0.909358	0.0316216	0.019882	0.0395271	0.0391611	0.037072	0.0207016	41	58188	0.0704613	75	58188	0.128893	21	58188	0.0360899	11	58188	0.0189042	6	58188	0.0103114	20	58188	0.0343713	9	58188	0.0154671	1	58188	0.00171857	33	58188	0.0567127	22	58188	0.0378085	3	58188	0.0051557	36	58188	0.0618684	5	58188	0.00859284	29	58188	0.0498385
Xiphinematobacter	0.427288	0.0316216	0.0231235	0.0824912	0.118852	0.0324073	0.00632634	9	58188	0.0154671	28	58188	0.0481199	43	58188	0.0738984	5	58188	0.00859284	41	58188	0.0704613	227	58188	0.390115	4	58188	0.00687427	27	58188	0.0464013	20	58188	0.0343713	21	58188	0.0360899	25	58188	0.0429642	12	58188	0.0206228	19	58188	0.0326528	17	58188	0.0292156
Caldicoprobacter	0.519999	0.0312779	0.0151156	0.0232007	0.0102034	0.0238144	0.0112667	20	58188	0.0343713	18	58188	0.0309342	20	58188	0.0343713	9	58188	0.0154671	5	58188	0.00859284	7	58188	0.01203	10	58188	0.0171857	19	58188	0.0326528	24	58188	0.0412456	17	58188	0.0292156	21	58188	0.0360899	4	58188	0.00687427	9	58188	0.0154671	11	58188	0.0189042
Endomicrobium	0.186367	0.0312779	0.0430178	0.026423	0.024859	0.0638325	0.0421505	10	58188	0.0171857	7	58188	0.01203	2	58188	0.00343713	3	58188	0.0051557	17	58188	0.0292156	27	58188	0.0464013	48	58188	0.0824912	9	58188	0.0154671	7	58188	0.01203	83	58188	0.142641	44	58188	0.075617	33	58188	0.0567127	56	58188	0.0962398	25	58188	0.0429642
Picrophilus	0.625401	0.0312779	0.020375	0.0354455	0.0238432	0.025042	0.00865922	5	58188	0.00859284	5	58188	0.00859284	12	58188	0.0206228	17	58188	0.0292156	45	58188	0.0773355	29	58188	0.0498385	37	58188	0.063587	15	58188	0.0257785	17	58188	0.0292156	17	58188	0.0292156	9	58188	0.0154671	8	58188	0.0137485	14	58188	0.0240599	24	58188	0.0412456
Thermosporothrix	0.793967	0.0312779	0.0419753	0.0283564	0.0272272	0.0201318	0.00975264	4	58188	0.00687427	7	58188	0.01203	11	58188	0.0189042	11	58188	0.0189042	54	58188	0.0928026	27	58188	0.0464013	15	58188	0.0257785	3	58188	0.0051557	12	58188	0.0206228	16	58188	0.0274971	20	58188	0.0343713	11	58188	0.0189042	15	58188	0.0257785	6	58188	0.0103114
Mobilisporobacter	0.033114	0.0309342	0.0533033	0.0970991	0.0701304	0.0166947	0.0152256	66	58188	0.113425	65	58188	0.111707	104	58188	0.178731	61	58188	0.104833	124	58188	0.213102	11	58188	0.0189042	7	58188	0.01203	14	58188	0.0240599	7	58188	0.01203	5	58188	0.00859284	31	58188	0.0532756	3	58188	0.0051557	7	58188	0.01203	6	58188	0.0103114
Gordonibacter	0.0967713	0.0305905	0.0103913	0.0109559	0.0128875	0.0171857	0.0165095	8	58188	0.0137485	4	58188	0.00687427	25	58188	0.0429642	7	58188	0.01203	0	58188	0	1	58188	0.00171857	4	58188	0.00687427	2	58188	0.00343713	23	58188	0.0395271	1	58188	0.00171857	7	58188	0.01203	1	58188	0.00171857	3	58188	0.0051557	9	58188	0.0154671
Elusimicrobium	0.214694	0.0302468	0.0203518	0.0530608	0.0316589	0.0301977	0.0190234	49	58188	0.0842098	13	58188	0.0223414	25	58188	0.0429642	1	58188	0.00171857	27	58188	0.0464013	32	58188	0.0549942	64	58188	0.109988	36	58188	0.0618684	5	58188	0.00859284	22	58188	0.0378085	6	58188	0.0103114	36	58188	0.0618684	27	58188	0.0464013	7	58188	0.01203
Thermophilibacter	0.00807897	0.0302468	0.0145257	0.00365196	0.00368967	0.0169402	0.0157892	0	58188	0	1	58188	0.00171857	6	58188	0.0103114	2	58188	0.00343713	0	58188	0	4	58188	0.00687427	4	58188	0.00687427	0	58188	0	7	58188	0.01203	10	58188	0.0171857	1	58188	0.00171857	0	58188	0	10	58188	0.0171857	11	58188	0.0189042
Ihubacter	0.853149	0.0299031	0.021288	0.0365196	0.0203298	0.0297067	0.0291898	42	58188	0.0721798	9	58188	0.0154671	31	58188	0.0532756	15	58188	0.0257785	4	58188	0.00687427	26	58188	0.0446828	28	58188	0.0481199	15	58188	0.0257785	57	58188	0.0979583	15	58188	0.0257785	14	58188	0.0240599	2	58188	0.00343713	8	58188	0.0137485	7	58188	0.01203
Butyricimonas	0.327616	0.0288719	0.00525781	0.0442531	0.0190162	0.0360899	0.0182108	30	58188	0.051557	26	58188	0.0446828	34	58188	0.0584313	6	58188	0.0103114	29	58188	0.0498385	9	58188	0.0154671	37	58188	0.063587	35	58188	0.0601499	14	58188	0.0240599	37	58188	0.063587	19	58188	0.0326528	7	58188	0.01203	12	58188	0.0206228	23	58188	0.0395271
Ructibacterium	0.507544	0.0278408	0.0213379	0.040816	0.0237472	0.0267605	0.0237574	17	58188	0.0292156	8	58188	0.0137485	16	58188	0.0274971	2	58188	0.00343713	33	58188	0.0567127	39	58188	0.0670241	36	58188	0.0618684	39	58188	0.0670241	47	58188	0.0807727	8	58188	0.0137485	18	58188	0.0309342	1	58188	0.00171857	16	58188	0.0274971	9	58188	0.0154671
Anaeroplasma	0.0177968	0.0264659	0.0166479	0.257785	0.186917	0.404845	0.241623	193	58188	0.331684	72	58188	0.123737	110	58188	0.189042	399	58188	0.685708	201	58188	0.345432	86	58188	0.147797	111	58188	0.190761	28	58188	0.0481199	420	58188	0.721798	242	58188	0.415893	104	58188	0.178731	249	58188	0.427923	151	58188	0.259504	441	58188	0.757888
Erysipelothrix	0.128174	0.0261222	0.0143539	0.096025	0.0414103	0.174557	0.17936	67	58188	0.115144	66	58188	0.113425	58	58188	0.0996769	51	58188	0.0876469	19	58188	0.0326528	75	58188	0.128893	92	58188	0.158108	19	58188	0.0326528	52	58188	0.0893655	355	58188	0.610091	58	58188	0.0996769	66	58188	0.113425	83	58188	0.142641	63	58188	0.10827
Senegalimassilia	0.0341363	0.0261222	0.0242409	0.00257785	0.00354292	0.00932937	0.00851179	0	58188	0	5	58188	0.00859284	5	58188	0.00859284	1	58188	0.00171857	1	58188	0.00171857	0	58188	0	0	58188	0	0	58188	0	7	58188	0.01203	0	58188	0	15	58188	0.0257785	0	58188	0	2	58188	0.00343713	6	58188	0.0103114
Monoglobus	0.301014	0.0257785	0.0126288	0.0262082	0.00993764	0.0174312	0.00956543	7	58188	0.01203	10	58188	0.0171857	17	58188	0.0292156	15	58188	0.0257785	22	58188	0.0378085	9	58188	0.0154671	24	58188	0.0412456	18	58188	0.0309342	10	58188	0.0171857	10	58188	0.0171857	4	58188	0.00687427	3	58188	0.0051557	18	58188	0.0309342	18	58188	0.0309342
Asteroleplasma	0.523082	0.0254348	0.0441428	0.0105262	0.0122259	0.0662876	0.142147	9	58188	0.0154671	2	58188	0.00343713	2	58188	0.00343713	24	58188	0.0412456	2	58188	0.00343713	2	58188	0.00343713	4	58188	0.00687427	4	58188	0.00687427	3	58188	0.0051557	241	58188	0.414175	12	58188	0.0206228	0	58188	0	5	58188	0.00859284	6	58188	0.0103114
Caproiciproducens	0.721292	0.0254348	0.0151156	0.0290008	0.0440791	0.0414911	0.0307623	3	58188	0.0051557	5	58188	0.00859284	8	58188	0.0137485	3	58188	0.0051557	32	58188	0.0549942	1	58188	0.00171857	80	58188	0.137485	3	58188	0.0051557	20	58188	0.0343713	5	58188	0.00859284	4	58188	0.00687427	19	58188	0.0326528	25	58188	0.0429642	36	58188	0.0618684
Escherichia_Shigella	0.349901	0.0254348	0.0209468	0.0427494	0.0205769	0.0483654	0.0308171	27	58188	0.0464013	28	58188	0.0481199	47	58188	0.0807727	11	58188	0.0189042	13	58188	0.0223414	31	58188	0.0532756	32	58188	0.0549942	10	58188	0.0171857	12	58188	0.0206228	23	58188	0.0395271	50	58188	0.0859284	8	58188	0.0137485	39	58188	0.0670241	54	58188	0.0928026
Sporobacter	0.327227	0.0254348	0.0137227	0.0399567	0.0204385	0.0498385	0.0339887	23	58188	0.0395271	15	58188	0.0257785	14	58188	0.0240599	7	58188	0.01203	18	58188	0.0309342	30	58188	0.051557	32	58188	0.0549942	47	58188	0.0807727	6	58188	0.0103114	48	58188	0.0824912	14	58188	0.0240599	10	58188	0.0171857	24	58188	0.0412456	38	58188	0.0653056
Anaerocolumna	0.412286	0.0250911	0.0130249	0.0382381	0.0200003	0.0304432	0.0125522	29	58188	0.0498385	7	58188	0.01203	14	58188	0.0240599	22	58188	0.0378085	43	58188	0.0738984	30	58188	0.051557	7	58188	0.01203	26	58188	0.0446828	26	58188	0.0446828	12	58188	0.0206228	14	58188	0.0240599	26	58188	0.0446828	26	58188	0.0446828	9	58188	0.0154671
Neglecta	0.812454	0.0247474	0.0350958	0.0148226	0.0359971	0.013503	0.00911367	0	58188	0	0	58188	0	2	58188	0.00343713	1	58188	0.00171857	0	58188	0	2	58188	0.00343713	64	58188	0.109988	0	58188	0	10	58188	0.0171857	11	58188	0.0189042	3	58188	0.0051557	2	58188	0.00343713	1	58188	0.00171857	15	58188	0.0257785
Flintibacter	0.447472	0.0244037	0.010448	0.0341565	0.0132128	0.0348624	0.0165532	16	58188	0.0274971	27	58188	0.0464013	17	58188	0.0292156	4	58188	0.00687427	30	58188	0.051557	23	58188	0.0395271	25	58188	0.0429642	17	58188	0.0292156	30	58188	0.051557	7	58188	0.01203	28	58188	0.0481199	18	58188	0.0309342	34	58188	0.0584313	14	58188	0.0240599
Collinsella	0.317725	0.0240599	0.0157884	0.0081632	0.00675235	0.025042	0.0325668	12	58188	0.0206228	1	58188	0.00171857	10	58188	0.0171857	4	58188	0.00687427	0	58188	0	3	58188	0.0051557	5	58188	0.00859284	3	58188	0.0051557	55	58188	0.0945212	3	58188	0.0051557	2	58188	0.00343713	1	58188	0.00171857	6	58188	0.0103114	5	58188	0.00859284
Pararoseburia	0.210678	0.0240599	0.0152556	0.124381	0.0993353	0.182905	0.20258	186	58188	0.319654	107	58188	0.183887	118	58188	0.202791	79	58188	0.135767	10	58188	0.0171857	27	58188	0.0464013	15	58188	0.0257785	37	58188	0.063587	256	58188	0.439953	43	58188	0.0738984	35	58188	0.0601499	324	58188	0.556816	35	58188	0.0601499	40	58188	0.0687427
Bifidobacterium	0.129935	0.0233725	0.0334057	0.00300749	0.00381874	0.0287246	0.0249841	0	58188	0	1	58188	0.00171857	3	58188	0.0051557	1	58188	0.00171857	0	58188	0	0	58188	0	7	58188	0.01203	2	58188	0.00343713	1	58188	0.00171857	13	58188	0.0223414	3	58188	0.0051557	20	58188	0.0343713	8	58188	0.0137485	26	58188	0.0446828
Catonella	0.200339	0.0233725	0.00938785	0.0292156	0.00880504	0.0201318	0.00815003	26	58188	0.0446828	22	58188	0.0378085	15	58188	0.0257785	14	58188	0.0240599	10	58188	0.0171857	16	58188	0.0274971	12	58188	0.0206228	21	58188	0.0360899	19	58188	0.0326528	14	58188	0.0240599	16	58188	0.0274971	5	58188	0.00859284	12	58188	0.0206228	6	58188	0.0103114
Lacrimispora	0.256607	0.0233725	0.0146875	0.059935	0.0304584	0.0955032	0.10676	24	58188	0.0412456	13	58188	0.0223414	33	58188	0.0567127	14	58188	0.0240599	32	58188	0.0549942	58	58188	0.0996769	40	58188	0.0687427	65	58188	0.111707	206	58188	0.354025	19	58188	0.0326528	18	58188	0.0309342	48	58188	0.0824912	33	58188	0.0567127	34	58188	0.0584313
Anoxynatronum	0.260152	0.0230288	0.0171375	0.00988176	0.0110293	0.013503	0.0100809	6	58188	0.0103114	21	58188	0.0360899	9	58188	0.0154671	0	58188	0	0	58188	0	4	58188	0.00687427	4	58188	0.00687427	2	58188	0.00343713	19	58188	0.0326528	13	58188	0.0223414	1	58188	0.00171857	9	58188	0.0154671	3	58188	0.0051557	4	58188	0.00687427
Prolixibacter	0.177095	0.0226851	0.00878993	0.16842	0.209046	0.051066	0.0463305	32	58188	0.0549942	18	58188	0.0309342	15	58188	0.0257785	20	58188	0.0343713	342	58188	0.58775	48	58188	0.0824912	40	58188	0.0687427	269	58188	0.462295	68	58188	0.116863	17	58188	0.0292156	13	58188	0.0223414	2	58188	0.00343713	25	58188	0.0429642	74	58188	0.127174
Weissella	0.522471	0.0226851	0.0244351	0.0322231	0.0153172	0.0554852	0.0758215	29	58188	0.0498385	12	58188	0.0206228	21	58188	0.0360899	22	58188	0.0378085	6	58188	0.0103114	29	58188	0.0498385	6	58188	0.0103114	25	58188	0.0429642	7	58188	0.01203	11	58188	0.0189042	2	58188	0.00343713	134	58188	0.230288	46	58188	0.0790541	26	58188	0.0446828
Poribacteria_genera_incertae_sedis	0.646915	0.0223414	0.00883016	0.0313639	0.021649	0.025533	0.0125762	20	58188	0.0343713	11	58188	0.0189042	47	58188	0.0807727	5	58188	0.00859284	9	58188	0.0154671	15	58188	0.0257785	27	58188	0.0464013	12	58188	0.0206228	5	58188	0.00859284	19	58188	0.0326528	18	58188	0.0309342	10	58188	0.0171857	29	58188	0.0498385	13	58188	0.0223414
Catenibacillus	0.405772	0.0219977	0.0115745	0.0174005	0.00977612	0.025042	0.00885198	21	58188	0.0360899	6	58188	0.0103114	12	58188	0.0206228	14	58188	0.0240599	2	58188	0.00343713	11	58188	0.0189042	4	58188	0.00687427	11	58188	0.0189042	9	58188	0.0154671	15	58188	0.0257785	19	58188	0.0326528	16	58188	0.0274971	18	58188	0.0309342	20	58188	0.0343713
Sellimonas	0.116169	0.0219977	0.0142299	0.0092373	0.006369	0.0147306	0.00762267	14	58188	0.0240599	3	58188	0.0051557	6	58188	0.0103114	4	58188	0.00687427	1	58188	0.00171857	7	58188	0.01203	3	58188	0.0051557	5	58188	0.00859284	14	58188	0.0240599	9	58188	0.0154671	10	58188	0.0171857	3	58188	0.0051557	4	58188	0.00687427	15	58188	0.0257785
Alterileibacterium	0.495912	0.0213102	0.0175462	0.0111707	0.00529698	0.0179222	0.0182999	7	58188	0.01203	5	58188	0.00859284	12	58188	0.0206228	5	58188	0.00859284	3	58188	0.0051557	5	58188	0.00859284	11	58188	0.0189042	4	58188	0.00687427	34	58188	0.0584313	7	58188	0.01203	8	58188	0.0137485	1	58188	0.00171857	2	58188	0.00343713	5	58188	0.00859284
Natranaerovirga	0.426515	0.0213102	0.0104027	0.0345862	0.024036	0.039036	0.0236659	42	58188	0.0721798	13	58188	0.0223414	20	58188	0.0343713	11	58188	0.0189042	5	58188	0.00859284	21	58188	0.0360899	43	58188	0.0738984	6	58188	0.0103114	51	58188	0.0876469	12	58188	0.0206228	22	58188	0.0378085	11	58188	0.0189042	17	58188	0.0292156	12	58188	0.0206228
Alloprevotella	0.167818	0.0209665	0.00646693	0.0320083	0.0146315	0.0196408	0.0117589	20	58188	0.0343713	5	58188	0.00859284	11	58188	0.0189042	26	58188	0.0446828	24	58188	0.0412456	9	58188	0.0154671	24	58188	0.0412456	30	58188	0.051557	1	58188	0.00171857	12	58188	0.0206228	4	58188	0.00687427	23	58188	0.0395271	14	58188	0.0240599	16	58188	0.0274971
Fusicatenibacter	0.236157	0.0209665	0.0113686	0.0436086	0.0280677	0.0351079	0.0150062	53	58188	0.0910841	22	58188	0.0378085	17	58188	0.0292156	53	58188	0.0910841	10	58188	0.0171857	17	58188	0.0292156	12	58188	0.0206228	19	58188	0.0326528	11	58188	0.0189042	13	58188	0.0223414	32	58188	0.0549942	9	58188	0.0154671	30	58188	0.051557	26	58188	0.0446828
Desulfosudis	0.588413	0.0206228	0.0113997	0.0279267	0.026187	0.0373175	0.0314712	8	58188	0.0137485	3	58188	0.0051557	6	58188	0.0103114	18	58188	0.0309342	11	58188	0.0189042	20	58188	0.0343713	54	58188	0.0928026	10	58188	0.0171857	1	58188	0.00171857	47	58188	0.0807727	6	58188	0.0103114	5	58188	0.00859284	20	58188	0.0343713	49	58188	0.0842098
Pseudobacteroides	0.859992	0.0206228	0.00990229	0.0272823	0.029908	0.0267605	0.0121471	22	58188	0.0378085	9	58188	0.0154671	14	58188	0.0240599	1	58188	0.00171857	4	58188	0.00687427	12	58188	0.0206228	6	58188	0.0103114	59	58188	0.101395	26	58188	0.0446828	10	58188	0.0171857	11	58188	0.0189042	9	58188	0.0154671	12	58188	0.0206228	27	58188	0.0464013
Robinsoniella	0.419704	0.0206228	0.0310105	0.00558534	0.00599962	0.0122755	0.0141844	6	58188	0.0103114	2	58188	0.00343713	4	58188	0.00687427	2	58188	0.00343713	0	58188	0	0	58188	0	11	58188	0.0189042	1	58188	0.00171857	5	58188	0.00859284	2	58188	0.00343713	2	58188	0.00343713	0	58188	0	5	58188	0.00859284	10	58188	0.0171857
Stenotrophomonas	0.239558	0.0206228	0.00704403	0.0257785	0.0214821	0.089611	0.121987	33	58188	0.0567127	23	58188	0.0395271	35	58188	0.0601499	3	58188	0.0051557	11	58188	0.0189042	5	58188	0.00859284	6	58188	0.0103114	4	58188	0.00687427	84	58188	0.14436	20	58188	0.0343713	5	58188	0.00859284	215	58188	0.369492	17	58188	0.0292156	9	58188	0.0154671
Emticicia	0.42271	0.0202791	0.00872247	0.0255637	0.0208266	0.0144851	0.00800075	9	58188	0.0154671	3	58188	0.0051557	9	58188	0.0154671	4	58188	0.00687427	22	58188	0.0378085	16	58188	0.0274971	43	58188	0.0738984	13	58188	0.0223414	7	58188	0.01203	17	58188	0.0292156	5	58188	0.00859284	1	58188	0.00171857	10	58188	0.0171857	8	58188	0.0137485
Ercella	0.362606	0.0202791	0.0103913	0.0350158	0.0226522	0.026515	0.0114314	43	58188	0.0738984	10	58188	0.0171857	22	58188	0.0378085	2	58188	0.00343713	24	58188	0.0412456	4	58188	0.00687427	29	58188	0.0498385	29	58188	0.0498385	14	58188	0.0240599	16	58188	0.0274971	13	58188	0.0223414	9	58188	0.0154671	7	58188	0.01203	21	58188	0.0360899
Xylanivirga	0.688161	0.0202791	0.0138513	0.0189042	0.0110377	0.0142396	0.0114997	11	58188	0.0189042	27	58188	0.0464013	9	58188	0.0154671	4	58188	0.00687427	7	58188	0.01203	10	58188	0.0171857	11	58188	0.0189042	9	58188	0.0154671	21	58188	0.0360899	14	58188	0.0240599	4	58188	0.00687427	10	58188	0.0171857	1	58188	0.00171857	2	58188	0.00343713
Metaprevotella	0.171108	0.0195917	0.0145257	0.0103114	0.00698085	0.00932937	0.00398906	9	58188	0.0154671	2	58188	0.00343713	1	58188	0.00171857	2	58188	0.00343713	7	58188	0.01203	11	58188	0.0189042	4	58188	0.00687427	12	58188	0.0206228	6	58188	0.0103114	3	58188	0.0051557	7	58188	0.01203	4	58188	0.00687427	5	58188	0.00859284	3	58188	0.0051557
Thermovirga	0.89644	0.0195917	0.00795754	0.0169709	0.0121957	0.0198863	0.0141674	3	58188	0.0051557	9	58188	0.0154671	6	58188	0.0103114	0	58188	0	6	58188	0.0103114	16	58188	0.0274971	18	58188	0.0309342	21	58188	0.0360899	29	58188	0.0498385	12	58188	0.0206228	3	58188	0.0051557	5	58188	0.00859284	5	58188	0.00859284	12	58188	0.0206228
Oryzomonas	0.278476	0.0189042	0.0060517	0.020408	0.00878142	0.0279881	0.0125858	9	58188	0.0154671	8	58188	0.0137485	11	58188	0.0189042	3	58188	0.0051557	12	58188	0.0206228	19	58188	0.0326528	19	58188	0.0326528	14	58188	0.0240599	26	58188	0.0446828	20	58188	0.0343713	9	58188	0.0154671	9	58188	0.0154671	27	58188	0.0464013	12	58188	0.0206228
Hymenobacter	0.132336	0.0182168	0.0111164	0.106336	0.112663	0.0427187	0.0158159	9	58188	0.0154671	18	58188	0.0309342	5	58188	0.00859284	4	58188	0.00687427	32	58188	0.0549942	101	58188	0.173575	153	58188	0.262941	173	58188	0.297312	18	58188	0.0309342	32	58188	0.0549942	42	58188	0.0721798	19	58188	0.0326528	30	58188	0.051557	17	58188	0.0292156
Lentimicrobium	0.855344	0.0182168	0.0101148	0.0244896	0.0242243	0.0220959	0.013731	3	58188	0.0051557	5	58188	0.00859284	2	58188	0.00343713	2	58188	0.00343713	46	58188	0.0790541	16	58188	0.0274971	20	58188	0.0343713	20	58188	0.0343713	8	58188	0.0137485	32	58188	0.0549942	12	58188	0.0206228	11	58188	0.0189042	7	58188	0.01203	11	58188	0.0189042
Roseimarinus	0.0603488	0.0182168	0.00963625	0.00794837	0.00631076	0.00662876	0.00725812	1	58188	0.00171857	0	58188	0	8	58188	0.0137485	2	58188	0.00343713	11	58188	0.0189042	6	58188	0.0103114	7	58188	0.01203	2	58188	0.00343713	0	58188	0	1	58188	0.00171857	8	58188	0.0137485	0	58188	0	8	58188	0.0137485	0	58188	0
Sporofaciens	0.303446	0.0182168	0.00938785	0.0158967	0.00952023	0.0100659	0.00665145	16	58188	0.0274971	2	58188	0.00343713	15	58188	0.0257785	11	58188	0.0189042	6	58188	0.0103114	4	58188	0.00687427	4	58188	0.00687427	16	58188	0.0274971	12	58188	0.0206228	0	58188	0	10	58188	0.0171857	2	58188	0.00343713	6	58188	0.0103114	5	58188	0.00859284
Ectobacillus	0.697151	0.0178731	0.0112221	0.0242748	0.0152129	0.0282336	0.0260611	8	58188	0.0137485	7	58188	0.01203	9	58188	0.0154671	7	58188	0.01203	14	58188	0.0240599	28	58188	0.0481199	30	58188	0.051557	10	58188	0.0171857	10	58188	0.0171857	53	58188	0.0910841	9	58188	0.0154671	14	58188	0.0240599	14	58188	0.0240599	9	58188	0.0154671
Thermoclostridium	0.489817	0.0178731	0.0164696	0.0279267	0.0155088	0.0213593	0.00962824	12	58188	0.0206228	18	58188	0.0309342	14	58188	0.0240599	6	58188	0.0103114	18	58188	0.0309342	38	58188	0.0653056	14	58188	0.0240599	10	58188	0.0171857	13	58188	0.0223414	23	58188	0.0395271	9	58188	0.0154671	6	58188	0.0103114	9	58188	0.0154671	9	58188	0.0154671
Ruminiclostridium	0.237689	0.0175294	0.00823479	0.0406012	0.0266785	0.039036	0.0244378	61	58188	0.104833	20	58188	0.0343713	14	58188	0.0240599	7	58188	0.01203	13	58188	0.0223414	27	58188	0.0464013	27	58188	0.0464013	20	58188	0.0343713	22	58188	0.0378085	19	58188	0.0326528	21	58188	0.0360899	56	58188	0.0962398	19	58188	0.0326528	10	58188	0.0171857
Sphingomonas	0.581816	0.0175294	0.0123641	0.0124596	0.009002	0.0201318	0.0171295	13	58188	0.0223414	1	58188	0.00171857	7	58188	0.01203	14	58188	0.0240599	14	58188	0.0240599	2	58188	0.00343713	4	58188	0.00687427	3	58188	0.0051557	5	58188	0.00859284	10	58188	0.0171857	35	58188	0.0601499	14	58188	0.0240599	6	58188	0.0103114	5	58188	0.00859284
Lactobacillus	0.411222	0.0171857	0.0182848	0.00472606	0.00452656	0.0191498	0.0300687	6	58188	0.0103114	1	58188	0.00171857	0	58188	0	2	58188	0.00343713	1	58188	0.00171857	0	58188	0	5	58188	0.00859284	7	58188	0.01203	0	58188	0	53	58188	0.0910841	11	58188	0.0189042	1	58188	0.00171857	4	58188	0.00687427	1	58188	0.00171857
Agathobaculum	0.265952	0.016842	0.00646693	0.0330824	0.0226654	0.025533	0.00878362	33	58188	0.0567127	4	58188	0.00687427	21	58188	0.0360899	4	58188	0.00687427	15	58188	0.0257785	20	58188	0.0343713	45	58188	0.0773355	12	58188	0.0206228	20	58188	0.0343713	15	58188	0.0257785	15	58188	0.0257785	8	58188	0.0137485	21	58188	0.0360899	18	58188	0.0309342
Desulfolutivibrio	0.400332	0.016842	0.0194859	0.00730391	0.00948137	0.00736529	0.00721648	5	58188	0.00859284	0	58188	0	0	58188	0	2	58188	0.00343713	1	58188	0.00171857	3	58188	0.0051557	18	58188	0.0309342	5	58188	0.00859284	12	58188	0.0206228	1	58188	0.00171857	0	58188	0	3	58188	0.0051557	7	58188	0.01203	0	58188	0
Methylorubrum	0.115357	0.016842	0.0120741	0.00601499	0.00332799	0.0108024	0.00788694	3	58188	0.0051557	1	58188	0.00171857	7	58188	0.01203	3	58188	0.0051557	2	58188	0.00343713	6	58188	0.0103114	4	58188	0.00687427	2	58188	0.00343713	1	58188	0.00171857	0	58188	0	13	58188	0.0223414	6	58188	0.0103114	12	58188	0.0206228	7	58188	0.01203
Fictibacillus	0.324729	0.0164982	0.00963625	0.00751873	0.00625199	0.0127665	0.0124219	8	58188	0.0137485	6	58188	0.0103114	0	58188	0	1	58188	0.00171857	0	58188	0	3	58188	0.0051557	7	58188	0.01203	10	58188	0.0171857	14	58188	0.0240599	17	58188	0.0292156	1	58188	0.00171857	0	58188	0	1	58188	0.00171857	3	58188	0.0051557
Lentihominibacter	0.883968	0.0164982	0.0107928	0.0191191	0.0108501	0.0208683	0.0180812	21	58188	0.0360899	19	58188	0.0326528	16	58188	0.0274971	5	58188	0.00859284	3	58188	0.0051557	9	58188	0.0154671	10	58188	0.0171857	6	58188	0.0103114	35	58188	0.0601499	16	58188	0.0274971	5	58188	0.00859284	6	58188	0.0103114	2	58188	0.00343713	15	58188	0.0257785
Amedibacillus	0.0315967	0.0161545	0.0118369	0.0414604	0.0438524	0.0847008	0.0435999	29	58188	0.0498385	86	58188	0.147797	30	58188	0.051557	21	58188	0.0360899	1	58188	0.00171857	9	58188	0.0154671	14	58188	0.0240599	3	58188	0.0051557	100	58188	0.171857	58	58188	0.0996769	20	58188	0.0343713	34	58188	0.0584313	27	58188	0.0464013	64	58188	0.109988
Aminicella	0.881019	0.0161545	0.00773164	0.0182598	0.00941053	0.0191498	0.0105312	11	58188	0.0189042	10	58188	0.0171857	8	58188	0.0137485	2	58188	0.00343713	10	58188	0.0171857	12	58188	0.0206228	9	58188	0.0154671	23	58188	0.0395271	19	58188	0.0326528	22	58188	0.0378085	7	58188	0.01203	5	58188	0.00859284	10	58188	0.0171857	7	58188	0.01203
Ancylomarina	0.439613	0.0161545	0.0297585	0.00300749	0.00499199	0.00785631	0.00936161	1	58188	0.00171857	0	58188	0	0	58188	0	1	58188	0.00171857	0	58188	0	3	58188	0.0051557	0	58188	0	9	58188	0.0154671	0	58188	0	2	58188	0.00343713	4	58188	0.00687427	0	58188	0	6	58188	0.0103114	3	58188	0.0051557
Caproicibacter	0.605653	0.0158108	0.00943805	0.162405	0.357205	0.123982	0.114043	18	58188	0.0309342	24	58188	0.0412456	30	58188	0.051557	2	58188	0.00343713	16	58188	0.0274971	14	58188	0.0240599	644	58188	1.10676	8	58188	0.0137485	87	58188	0.149515	212	58188	0.364336	13	58188	0.0223414	14	58188	0.0240599	17	58188	0.0292156	103	58188	0.177012
Geothermobacter	0.712703	0.0158108	0.0116761	0.0156819	0.00689773	0.01203	0.00821632	12	58188	0.0206228	13	58188	0.0223414	3	58188	0.0051557	6	58188	0.0103114	9	58188	0.0154671	14	58188	0.0240599	12	58188	0.0206228	4	58188	0.00687427	15	58188	0.0257785	12	58188	0.0206228	4	58188	0.00687427	1	58188	0.00171857	7	58188	0.01203	8	58188	0.0137485
Phascolarctobacterium	0.155529	0.0158108	0.0066471	0.00837802	0.00458229	0.0110479	0.00661511	8	58188	0.0137485	0	58188	0	7	58188	0.01203	2	58188	0.00343713	7	58188	0.01203	4	58188	0.00687427	7	58188	0.01203	4	58188	0.00687427	6	58188	0.0103114	3	58188	0.0051557	7	58188	0.01203	3	58188	0.0051557	4	58188	0.00687427	15	58188	0.0257785
Methylobacterium	0.147557	0.0154671	0.0141717	0.00558534	0.00372081	0.013503	0.00737347	1	58188	0.00171857	4	58188	0.00687427	6	58188	0.0103114	2	58188	0.00343713	6	58188	0.0103114	0	58188	0	5	58188	0.00859284	2	58188	0.00343713	15	58188	0.0257785	1	58188	0.00171857	10	58188	0.0171857	11	58188	0.0189042	5	58188	0.00859284	5	58188	0.00859284
Caminibacter	0.164891	0.0151234	0.0216676	0.00236303	0.00270879	0.00294612	0.00327551	3	58188	0.0051557	4	58188	0.00687427	0	58188	0	0	58188	0	3	58188	0.0051557	1	58188	0.00171857	0	58188	0	0	58188	0	5	58188	0.00859284	4	58188	0.00687427	2	58188	0.00343713	0	58188	0	0	58188	0	0	58188	0
Gp3	0.685715	0.0151234	0.00453389	0.0174005	0.0101831	0.012521	0.0121074	24	58188	0.0412456	5	58188	0.00859284	11	58188	0.0189042	11	58188	0.0189042	8	58188	0.0137485	12	58188	0.0206228	5	58188	0.00859284	5	58188	0.00859284	2	58188	0.00343713	9	58188	0.0154671	23	58188	0.0395271	2	58188	0.00343713	2	58188	0.00343713	9	58188	0.0154671
Hornefia	0.0937855	0.0151234	0.0103913	0.0051557	0.00364563	0.012521	0.00830389	4	58188	0.00687427	1	58188	0.00171857	7	58188	0.01203	3	58188	0.0051557	1	58188	0.00171857	4	58188	0.00687427	4	58188	0.00687427	0	58188	0	16	58188	0.0274971	6	58188	0.0103114	0	58188	0	7	58188	0.01203	3	58188	0.0051557	11	58188	0.0189042
Latescibacteria_genera_incertae_sedis	0.159206	0.0151234	0.0066471	0.00708909	0.00518694	0.0127665	0.00856121	3	58188	0.0051557	1	58188	0.00171857	9	58188	0.0154671	0	58188	0	4	58188	0.00687427	7	58188	0.01203	7	58188	0.01203	2	58188	0.00343713	3	58188	0.0051557	6	58188	0.0103114	13	58188	0.0223414	8	58188	0.0137485	1	58188	0.00171857	16	58188	0.0274971
Rothia	0.278133	0.0151234	0.00844724	0.00837802	0.0092722	0.00613774	0.00820898	3	58188	0.0051557	7	58188	0.01203	4	58188	0.00687427	0	58188	0	4	58188	0.00687427	18	58188	0.0309342	0	58188	0	3	58188	0.0051557	0	58188	0	1	58188	0.00171857	1	58188	0.00171857	7	58188	0.01203	14	58188	0.0240599	1	58188	0.00171857
Synergistes	0.00168659	0.0151234	0.00426537	0.0040816	0.00549791	0.00392815	0.00340188	0	58188	0	0	58188	0	0	58188	0	0	58188	0	3	58188	0.0051557	1	58188	0.00171857	9	58188	0.0154671	6	58188	0.0103114	6	58188	0.0103114	4	58188	0.00687427	0	58188	0	0	58188	0	2	58188	0.00343713	2	58188	0.00343713
Desulfurella	0.33465	0.0147797	0.0101148	0.00751873	0.00549791	0.00908386	0.00825292	6	58188	0.0103114	0	58188	0	6	58188	0.0103114	10	58188	0.0171857	1	58188	0.00171857	7	58188	0.01203	3	58188	0.0051557	2	58188	0.00343713	0	58188	0	3	58188	0.0051557	12	58188	0.0206228	5	58188	0.00859284	1	58188	0.00171857	13	58188	0.0223414
Geoalkalibacter	0.0563237	0.0147797	0.00701041	0.0339417	0.0185444	0.0189042	0.00821632	22	58188	0.0378085	4	58188	0.00687427	33	58188	0.0567127	26	58188	0.0446828	9	58188	0.0154671	20	58188	0.0343713	35	58188	0.0601499	9	58188	0.0154671	19	58188	0.0326528	13	58188	0.0223414	12	58188	0.0206228	11	58188	0.0189042	8	58188	0.0137485	12	58188	0.0206228
Mediterranea	0.935872	0.0147797	0.00516715	0.0141782	0.0107238	0.0159581	0.00830389	3	58188	0.0051557	0	58188	0	7	58188	0.01203	3	58188	0.0051557	12	58188	0.0206228	7	58188	0.01203	14	58188	0.0240599	20	58188	0.0343713	10	58188	0.0171857	10	58188	0.0171857	9	58188	0.0154671	0	58188	0	6	58188	0.0103114	15	58188	0.0257785
Novisyntrophococcus	0.207919	0.0147797	0.0100562	0.0137485	0.0108352	0.0233234	0.00810554	9	58188	0.0154671	7	58188	0.01203	3	58188	0.0051557	9	58188	0.0154671	1	58188	0.00171857	8	58188	0.0137485	23	58188	0.0395271	4	58188	0.00687427	12	58188	0.0206228	21	58188	0.0360899	12	58188	0.0206228	9	58188	0.0154671	7	58188	0.01203	19	58188	0.0326528
Achromobacter	0.209784	0.014436	0.0103457	0.0438235	0.0377401	0.0218504	0.0233428	64	58188	0.109988	41	58188	0.0704613	43	58188	0.0738984	10	58188	0.0171857	36	58188	0.0618684	2	58188	0.00343713	3	58188	0.0051557	5	58188	0.00859284	20	58188	0.0343713	1	58188	0.00171857	1	58188	0.00171857	41	58188	0.0704613	14	58188	0.0240599	0	58188	0
Gallibacter	0.240256	0.014436	0.00853074	0.0128893	0.0129179	0.0252875	0.0160879	26	58188	0.0446828	2	58188	0.00343713	6	58188	0.0103114	3	58188	0.0051557	3	58188	0.0051557	2	58188	0.00343713	8	58188	0.0137485	10	58188	0.0171857	13	58188	0.0223414	13	58188	0.0223414	14	58188	0.0240599	3	58188	0.0051557	4	58188	0.00687427	29	58188	0.0498385
Tepidimicrobium	0.515953	0.014436	0.0178135	0.00945212	0.00470649	0.00736529	0.00340188	6	58188	0.0103114	10	58188	0.0171857	6	58188	0.0103114	6	58188	0.0103114	5	58188	0.00859284	8	58188	0.0137485	1	58188	0.00171857	2	58188	0.00343713	6	58188	0.0103114	5	58188	0.00859284	7	58188	0.01203	1	58188	0.00171857	4	58188	0.00687427	2	58188	0.00343713
Alicyclobacillus	0.296411	0.0140923	0.00397877	0.0137485	0.00582795	0.00957488	0.00534512	11	58188	0.0189042	10	58188	0.0171857	2	58188	0.00343713	3	58188	0.0051557	7	58188	0.01203	10	58188	0.0171857	11	58188	0.0189042	10	58188	0.0171857	7	58188	0.01203	7	58188	0.01203	5	58188	0.00859284	0	58188	0	11	58188	0.0189042	5	58188	0.00859284
Lysinibacillus	0.582523	0.0140923	0.0131063	0.00837802	0.00559772	0.0117845	0.00863831	7	58188	0.01203	0	58188	0	8	58188	0.0137485	1	58188	0.00171857	3	58188	0.0051557	6	58188	0.0103114	4	58188	0.00687427	10	58188	0.0171857	3	58188	0.0051557	8	58188	0.0137485	2	58188	0.00343713	0	58188	0	8	58188	0.0137485	13	58188	0.0223414
Paenibacillus	0.548465	0.0137485	0.00307427	0.0126744	0.00758595	0.00932937	0.00773258	17	58188	0.0292156	6	58188	0.0103114	4	58188	0.00687427	5	58188	0.00859284	6	58188	0.0103114	6	58188	0.0103114	12	58188	0.0206228	3	58188	0.0051557	5	58188	0.00859284	8	58188	0.0137485	15	58188	0.0257785	4	58188	0.00687427	1	58188	0.00171857	4	58188	0.00687427
Taibaiella	0.348485	0.0137485	0.00661146	0.0163264	0.0141977	0.024551	0.0133662	11	58188	0.0189042	3	58188	0.0051557	3	58188	0.0051557	2	58188	0.00343713	28	58188	0.0481199	16	58188	0.0274971	6	58188	0.0103114	7	58188	0.01203	1	58188	0.00171857	19	58188	0.0326528	17	58188	0.0292156	4	58188	0.00687427	20	58188	0.0343713	16	58188	0.0274971
Agrobacterium	0.509876	0.0134048	0.00794268	0.018045	0.0150313	0.0935392	0.21652	12	58188	0.0206228	20	58188	0.0343713	27	58188	0.0464013	1	58188	0.00171857	13	58188	0.0223414	5	58188	0.00859284	5	58188	0.00859284	1	58188	0.00171857	6	58188	0.0103114	1	58188	0.00171857	0	58188	0	363	58188	0.62384	3	58188	0.0051557	3	58188	0.0051557
Saccharicrinis	0.154041	0.0134048	0.0101031	0.0081632	0.00409852	0.00540121	0.00415194	2	58188	0.00343713	1	58188	0.00171857	6	58188	0.0103114	5	58188	0.00859284	4	58188	0.00687427	8	58188	0.0137485	4	58188	0.00687427	8	58188	0.0137485	1	58188	0.00171857	2	58188	0.00343713	6	58188	0.0103114	0	58188	0	2	58188	0.00343713	4	58188	0.00687427
Chengkuizengella	0.861079	0.0130611	0.00795754	0.0135337	0.00843839	0.0110479	0.00856121	17	58188	0.0292156	6	58188	0.0103114	6	58188	0.0103114	7	58188	0.01203	3	58188	0.0051557	6	58188	0.0103114	15	58188	0.0257785	3	58188	0.0051557	2	58188	0.00343713	17	58188	0.0292156	3	58188	0.0051557	6	58188	0.0103114	3	58188	0.0051557	4	58188	0.00687427
Acholeplasma	0.0776319	0.0127174	0.00468763	0.0771207	0.0616139	0.0797906	0.047314	51	58188	0.0876469	38	58188	0.0653056	38	58188	0.0653056	9	58188	0.0154671	43	58188	0.0738984	14	58188	0.0240599	133	58188	0.228569	33	58188	0.0567127	22	58188	0.0378085	104	58188	0.178731	45	58188	0.0773355	26	58188	0.0446828	45	58188	0.0773355	63	58188	0.10827
Desulfonema	0.344368	0.0127174	0.00415311	0.00966694	0.0064267	0.0076108	0.00467114	8	58188	0.0137485	6	58188	0.0103114	10	58188	0.0171857	4	58188	0.00687427	0	58188	0	10	58188	0.0171857	7	58188	0.01203	0	58188	0	7	58188	0.01203	8	58188	0.0137485	4	58188	0.00687427	1	58188	0.00171857	7	58188	0.01203	3	58188	0.0051557
Gottschalkia	0.405428	0.0127174	0.00279234	0.0184746	0.0113266	0.0117845	0.00969685	3	58188	0.0051557	3	58188	0.0051557	10	58188	0.0171857	6	58188	0.0103114	21	58188	0.0360899	8	58188	0.0137485	17	58188	0.0292156	18	58188	0.0309342	18	58188	0.0309342	3	58188	0.0051557	11	58188	0.0189042	3	58188	0.0051557	0	58188	0	5	58188	0.00859284
Huintestinicola	0.136475	0.0127174	0.00581272	0.0410308	0.0227578	0.026515	0.0274027	48	58188	0.0824912	8	58188	0.0137485	27	58188	0.0464013	14	58188	0.0240599	13	58188	0.0223414	26	58188	0.0446828	15	58188	0.0257785	40	58188	0.0687427	8	58188	0.0137485	0	58188	0	12	58188	0.0206228	31	58188	0.0532756	47	58188	0.0807727	2	58188	0.00343713
Herbinix	0.1632	0.0123737	0.00589346	0.0221266	0.00911155	0.0154671	0.00890628	14	58188	0.0240599	8	58188	0.0137485	11	58188	0.0189042	14	58188	0.0240599	3	58188	0.0051557	15	58188	0.0257785	22	58188	0.0378085	16	58188	0.0274971	17	58188	0.0292156	16	58188	0.0274971	7	58188	0.01203	3	58188	0.0051557	4	58188	0.00687427	6	58188	0.0103114
Succinimonas	0.402446	0.0123737	0.0130611	0.0182598	0.0149559	0.819511	1.92686	20	58188	0.0343713	17	58188	0.0292156	26	58188	0.0446828	6	58188	0.0103114	1	58188	0.00171857	5	58188	0.00859284	1	58188	0.00171857	9	58188	0.0154671	5	58188	0.00859284	23	58188	0.0395271	3223	58188	5.53894	51	58188	0.0876469	17	58188	0.0292156	8	58188	0.0137485
Brucella	0.434448	0.01203	0.00326075	0.0257785	0.0235951	0.0174312	0.0148812	28	58188	0.0481199	37	58188	0.063587	31	58188	0.0532756	3	58188	0.0051557	12	58188	0.0206228	1	58188	0.00171857	2	58188	0.00343713	6	58188	0.0103114	14	58188	0.0240599	9	58188	0.0154671	1	58188	0.00171857	29	58188	0.0498385	3	58188	0.0051557	6	58188	0.0103114
Desulfohalovibrio	0.572863	0.01203	0.00473776	0.00794837	0.00411538	0.00883835	0.00878362	5	58188	0.00859284	7	58188	0.01203	2	58188	0.00343713	4	58188	0.00687427	4	58188	0.00687427	1	58188	0.00171857	5	58188	0.00859284	9	58188	0.0154671	17	58188	0.0292156	3	58188	0.0051557	2	58188	0.00343713	0	58188	0	4	58188	0.00687427	5	58188	0.00859284
Perlabentimonas	0.0880311	0.01203	0.0060517	0.00537052	0.00388464	0.00613774	0.00467114	4	58188	0.00687427	2	58188	0.00343713	2	58188	0.00343713	5	58188	0.00859284	1	58188	0.00171857	1	58188	0.00171857	2	58188	0.00343713	8	58188	0.0137485	0	58188	0	3	58188	0.0051557	0	58188	0	3	58188	0.0051557	7	58188	0.01203	5	58188	0.00859284
Thermomicrobium	0.0315908	0.01203	0.0121521	0.00193339	0.00159315	0.00147306	0.00232911	0	58188	0	1	58188	0.00171857	1	58188	0.00171857	0	58188	0	1	58188	0.00171857	3	58188	0.0051557	1	58188	0.00171857	2	58188	0.00343713	0	58188	0	0	58188	0	1	58188	0.00171857	0	58188	0	0	58188	0	1	58188	0.00171857
Paludihabitans	0.847548	0.0116863	0.00794268	0.018045	0.022506	0.013994	0.0191246	9	58188	0.0154671	0	58188	0	5	58188	0.00859284	8	58188	0.0137485	3	58188	0.0051557	1	58188	0.00171857	43	58188	0.0738984	15	58188	0.0257785	8	58188	0.0137485	35	58188	0.0601499	2	58188	0.00343713	4	58188	0.00687427	3	58188	0.0051557	2	58188	0.00343713
Thermodesulfomicrobium	0.494304	0.0116863	0.00716047	0.00687427	0.00601499	0.00834733	0.00639269	6	58188	0.0103114	8	58188	0.0137485	3	58188	0.0051557	1	58188	0.00171857	0	58188	0	4	58188	0.00687427	10	58188	0.0171857	0	58188	0	3	58188	0.0051557	4	58188	0.00687427	0	58188	0	12	58188	0.0206228	8	58188	0.0137485	5	58188	0.00859284
Thermophagus	0.0429474	0.0116863	0.00794268	0.00837802	0.00559772	0.0024551	0.00222318	0	58188	0	4	58188	0.00687427	3	58188	0.0051557	4	58188	0.00687427	2	58188	0.00343713	10	58188	0.0171857	9	58188	0.0154671	7	58188	0.01203	2	58188	0.00343713	1	58188	0.00171857	0	58188	0	0	58188	0	4	58188	0.00687427	1	58188	0.00171857
Acutalibacter	0.687375	0.0113425	0.00975807	0.0152523	0.0153338	0.0186587	0.0126431	1	58188	0.00171857	5	58188	0.00859284	27	58188	0.0464013	2	58188	0.00343713	1	58188	0.00171857	5	58188	0.00859284	11	58188	0.0189042	19	58188	0.0326528	21	58188	0.0360899	3	58188	0.0051557	8	58188	0.0137485	5	58188	0.00859284	6	58188	0.0103114	10	58188	0.0171857
Anaerocella	0.434371	0.0113425	0.0108474	0.00665945	0.00954685	0.00441917	0.00288409	1	58188	0.00171857	1	58188	0.00171857	0	58188	0	0	58188	0	3	58188	0.0051557	16	58188	0.0274971	10	58188	0.0171857	0	58188	0	5	58188	0.00859284	2	58188	0.00343713	1	58188	0.00171857	1	58188	0.00171857	1	58188	0.00171857	3	58188	0.0051557
Cellulosilyticum	0.268969	0.0113425	0.00963625	0.037164	0.0239205	0.0461558	0.0492674	44	58188	0.075617	10	58188	0.0171857	31	58188	0.0532756	8	58188	0.0137485	6	58188	0.0103114	32	58188	0.0549942	33	58188	0.0567127	9	58188	0.0154671	95	58188	0.163264	5	58188	0.00859284	19	58188	0.0326528	27	58188	0.0464013	21	58188	0.0360899	11	58188	0.0189042
Gp4	0.286864	0.0113425	0.00832042	0.00794837	0.00383682	0.00564672	0.00437806	3	58188	0.0051557	7	58188	0.01203	3	58188	0.0051557	6	58188	0.0103114	2	58188	0.00343713	6	58188	0.0103114	8	58188	0.0137485	2	58188	0.00343713	7	58188	0.01203	4	58188	0.00687427	7	58188	0.01203	1	58188	0.00171857	1	58188	0.00171857	2	58188	0.00343713
Lautropia	0.0329735	0.0113425	0.008736	0.00343713	0.00420961	0.00220959	0.0021959	2	58188	0.00343713	0	58188	0	1	58188	0.00171857	0	58188	0	1	58188	0.00171857	3	58188	0.0051557	1	58188	0.00171857	8	58188	0.0137485	1	58188	0.00171857	0	58188	0	0	58188	0	0	58188	0	2	58188	0.00343713	3	58188	0.0051557
Proteiniborus	0.394942	0.0113425	0.00859971	0.0186894	0.0121654	0.0191498	0.00665145	7	58188	0.01203	12	58188	0.0206228	13	58188	0.0223414	6	58188	0.0103114	2	58188	0.00343713	20	58188	0.0343713	23	58188	0.0395271	4	58188	0.00687427	18	58188	0.0309342	11	58188	0.0189042	5	58188	0.00859284	8	58188	0.0137485	12	58188	0.0206228	14	58188	0.0240599
Sunxiuqinia	0.74908	0.0113425	0.00945056	0.0158967	0.0169423	0.0110479	0.00722483	3	58188	0.0051557	0	58188	0	3	58188	0.0051557	1	58188	0.00171857	28	58188	0.0481199	3	58188	0.0051557	19	58188	0.0326528	17	58188	0.0292156	4	58188	0.00687427	16	58188	0.0274971	7	58188	0.01203	3	58188	0.0051557	5	58188	0.00859284	3	58188	0.0051557
Vallitalea	0.281669	0.0113425	0.00455987	0.0135337	0.00710859	0.00859284	0.00290491	7	58188	0.01203	4	58188	0.00687427	13	58188	0.0223414	8	58188	0.0137485	3	58188	0.0051557	14	58188	0.0240599	11	58188	0.0189042	3	58188	0.0051557	6	58188	0.0103114	2	58188	0.00343713	7	58188	0.01203	4	58188	0.00687427	5	58188	0.00859284	4	58188	0.00687427
Zhaonella	0.654653	0.0113425	0.015356	0.00580016	0.0078255	0.00638325	0.00750312	1	58188	0.00171857	2	58188	0.00343713	4	58188	0.00687427	0	58188	0	3	58188	0.0051557	15	58188	0.0257785	1	58188	0.00171857	1	58188	0.00171857	14	58188	0.0240599	2	58188	0.00343713	4	58188	0.00687427	0	58188	0	2	58188	0.00343713	3	58188	0.0051557
Azospirillum	0.206812	0.0109988	0.00709417	0.0356603	0.0207611	0.0451738	0.0439949	19	58188	0.0326528	39	58188	0.0670241	11	58188	0.0189042	26	58188	0.0446828	22	58188	0.0378085	8	58188	0.0137485	37	58188	0.063587	4	58188	0.00687427	3	58188	0.0051557	7	58188	0.01203	33	58188	0.0567127	82	58188	0.140923	34	58188	0.0584313	19	58188	0.0326528
Butyricicoccus	0.0108986	0.0109988	0.00657563	0.0988176	0.0732461	0.11539	0.0318803	60	58188	0.103114	33	58188	0.0567127	102	58188	0.175294	32	58188	0.0549942	18	58188	0.0309342	42	58188	0.0721798	149	58188	0.256067	24	58188	0.0412456	50	58188	0.0859284	72	58188	0.123737	48	58188	0.0824912	57	58188	0.0979583	55	58188	0.0945212	98	58188	0.16842
Fastidiosipila	0.525911	0.0109988	0.0120349	0.0131041	0.00948867	0.00687427	0.00784863	9	58188	0.0154671	6	58188	0.0103114	5	58188	0.00859284	2	58188	0.00343713	3	58188	0.0051557	7	58188	0.01203	8	58188	0.0137485	21	58188	0.0360899	2	58188	0.00343713	7	58188	0.01203	14	58188	0.0240599	0	58188	0	2	58188	0.00343713	2	58188	0.00343713
Megamonas	0.110468	0.0109988	0.0075773	0.0040816	0.00270879	0.00736529	0.00474793	1	58188	0.00171857	3	58188	0.0051557	4	58188	0.00687427	2	58188	0.00343713	1	58188	0.00171857	5	58188	0.00859284	3	58188	0.0051557	0	58188	0	3	58188	0.0051557	9	58188	0.0154671	5	58188	0.00859284	0	58188	0	7	58188	0.01203	3	58188	0.0051557
Algoriphagus	0.904794	0.0106551	0.0187757	0.0174005	0.0346008	0.013503	0.0127429	0	58188	0	2	58188	0.00343713	0	58188	0	0	58188	0	4	58188	0.00687427	5	58188	0.00859284	7	58188	0.01203	63	58188	0.10827	9	58188	0.0154671	3	58188	0.0051557	1	58188	0.00171857	5	58188	0.00859284	2	58188	0.00343713	11	58188	0.0189042
Chitinophaga	0.608477	0.0106551	0.0151156	0.0174005	0.021213	0.00859284	0.00846919	6	58188	0.0103114	6	58188	0.0103114	6	58188	0.0103114	0	58188	0	20	58188	0.0343713	39	58188	0.0670241	3	58188	0.0051557	1	58188	0.00171857	1	58188	0.00171857	11	58188	0.0189042	1	58188	0.00171857	3	58188	0.0051557	4	58188	0.00687427	14	58188	0.0240599
Paludibacter	0.304212	0.0106551	0.0073236	0.0582165	0.0516103	0.0569582	0.0692041	101	58188	0.173575	3	58188	0.0051557	33	58188	0.0567127	43	58188	0.0738984	49	58188	0.0842098	6	58188	0.0103114	27	58188	0.0464013	9	58188	0.0154671	0	58188	0	95	58188	0.163264	98	58188	0.16842	5	58188	0.00859284	11	58188	0.0189042	12	58188	0.0206228
Caldilinea	0.264411	0.0103114	0.00554221	0.0148226	0.0072881	0.00932937	0.00493468	5	58188	0.00859284	14	58188	0.0240599	11	58188	0.0189042	2	58188	0.00343713	13	58188	0.0223414	12	58188	0.0206228	8	58188	0.0137485	4	58188	0.00687427	3	58188	0.0051557	5	58188	0.00859284	3	58188	0.0051557	6	58188	0.0103114	5	58188	0.00859284	12	58188	0.0206228
Cellulophaga	0.292761	0.0103114	0.00834877	0.00451124	0.00270879	0.00564672	0.00647699	2	58188	0.00343713	4	58188	0.00687427	4	58188	0.00687427	3	58188	0.0051557	1	58188	0.00171857	2	58188	0.00343713	0	58188	0	5	58188	0.00859284	0	58188	0	1	58188	0.00171857	0	58188	0	3	58188	0.0051557	1	58188	0.00171857	10	58188	0.0171857
Gracilibacter	0.739745	0.0103114	0.00564779	0.0137485	0.00876301	0.0112934	0.00751115	13	58188	0.0223414	16	58188	0.0274971	9	58188	0.0154671	1	58188	0.00171857	4	58188	0.00687427	2	58188	0.00343713	12	58188	0.0206228	7	58188	0.01203	15	58188	0.0257785	10	58188	0.0171857	3	58188	0.0051557	4	58188	0.00687427	1	58188	0.00171857	6	58188	0.0103114
Megasphaera	0.344014	0.0103114	0.0157884	0.00257785	0.00192142	0.00417366	0.00484843	1	58188	0.00171857	1	58188	0.00171857	2	58188	0.00343713	1	58188	0.00171857	1	58188	0.00171857	4	58188	0.00687427	0	58188	0	2	58188	0.00343713	9	58188	0.0154671	2	58188	0.00343713	1	58188	0.00171857	0	58188	0	1	58188	0.00171857	1	58188	0.00171857
Campylobacter	0.0916795	0.00996769	0.0108909	0.0820616	0.0726171	0.0699702	0.0376375	53	58188	0.0910841	18	58188	0.0309342	11	58188	0.0189042	78	58188	0.134048	36	58188	0.0618684	145	58188	0.249192	17	58188	0.0292156	24	58188	0.0412456	25	58188	0.0429642	31	58188	0.0532756	24	58188	0.0412456	19	58188	0.0326528	58	58188	0.0996769	85	58188	0.146078
Phosphitispora	0.642997	0.00996769	0.00227994	0.0092373	0.00402467	0.01203	0.00768567	4	58188	0.00687427	3	58188	0.0051557	3	58188	0.0051557	4	58188	0.00687427	10	58188	0.0171857	8	58188	0.0137485	5	58188	0.00859284	6	58188	0.0103114	4	58188	0.00687427	2	58188	0.00343713	5	58188	0.00859284	2	58188	0.00343713	11	58188	0.0189042	13	58188	0.0223414
Desulfobulbus	0.562056	0.00962398	0.0057102	0.00558534	0.0025418	0.00589223	0.00927104	3	58188	0.0051557	6	58188	0.0103114	1	58188	0.00171857	2	58188	0.00343713	3	58188	0.0051557	3	58188	0.0051557	3	58188	0.0051557	5	58188	0.00859284	0	58188	0	5	58188	0.00859284	16	58188	0.0274971	0	58188	0	0	58188	0	2	58188	0.00343713
Cruoricaptor	0.948465	0.00928026	0.00859971	0.0081632	0.0111624	0.0100659	0.0108858	0	58188	0	0	58188	0	1	58188	0.00171857	0	58188	0	20	58188	0.0343713	2	58188	0.00343713	7	58188	0.01203	8	58188	0.0137485	20	58188	0.0343713	4	58188	0.00687427	0	58188	0	1	58188	0.00171857	6	58188	0.0103114	2	58188	0.00343713
Curtobacterium	0.181884	0.00928026	0.0131153	0.00128893	0.00341018	0.00196408	0.00266692	0	58188	0	0	58188	0	0	58188	0	0	58188	0	6	58188	0.0103114	0	58188	0	0	58188	0	0	58188	0	0	58188	0	0	58188	0	3	58188	0.0051557	0	58188	0	1	58188	0.00171857	4	58188	0.00687427
Harryflintia	0.667842	0.00928026	0.00866812	0.0131041	0.0122711	0.0166947	0.0157701	5	58188	0.00859284	13	58188	0.0223414	2	58188	0.00343713	3	58188	0.0051557	8	58188	0.0137485	1	58188	0.00171857	5	58188	0.00859284	24	58188	0.0412456	5	58188	0.00859284	31	58188	0.0532756	5	58188	0.00859284	3	58188	0.0051557	6	58188	0.0103114	13	58188	0.0223414
Muricauda	0.491713	0.00928026	0.0067529	0.0092373	0.00841649	0.0051557	0.00343713	2	58188	0.00343713	3	58188	0.0051557	2	58188	0.00343713	4	58188	0.00687427	5	58188	0.00859284	5	58188	0.00859284	4	58188	0.00687427	18	58188	0.0309342	2	58188	0.00343713	2	58188	0.00343713	4	58188	0.00687427	1	58188	0.00171857	4	58188	0.00687427	1	58188	0.00171857
Salinivirga	0.00466068	0.00928026	0.00765486	0.0571424	0.0332438	0.0203773	0.00934228	43	58188	0.0738984	20	58188	0.0343713	53	58188	0.0910841	18	58188	0.0309342	38	58188	0.0653056	68	58188	0.116863	18	58188	0.0309342	8	58188	0.0137485	5	58188	0.00859284	20	58188	0.0343713	10	58188	0.0171857	6	58188	0.0103114	9	58188	0.0154671	18	58188	0.0309342
Halomonas	0.519656	0.00893655	0.0107269	0.00365196	0.00388464	0.00613774	0.00745477	1	58188	0.00171857	7	58188	0.01203	3	58188	0.0051557	1	58188	0.00171857	0	58188	0	1	58188	0.00171857	4	58188	0.00687427	0	58188	0	1	58188	0.00171857	0	58188	0	1	58188	0.00171857	0	58188	0	13	58188	0.0223414	5	58188	0.00859284
Hippea	0.896464	0.00859284	0.00862714	0.0100966	0.00695104	0.0110479	0.00927104	9	58188	0.0154671	8	58188	0.0137485	0	58188	0	2	58188	0.00343713	8	58188	0.0137485	4	58188	0.00687427	13	58188	0.0223414	3	58188	0.0051557	13	58188	0.0223414	7	58188	0.01203	5	58188	0.00859284	0	58188	0	0	58188	0	15	58188	0.0257785
Traorella	0.309277	0.00859284	0.00434767	0.00429642	0.00321515	0.0105569	0.0110779	3	58188	0.0051557	7	58188	0.01203	2	58188	0.00343713	1	58188	0.00171857	1	58188	0.00171857	3	58188	0.0051557	1	58188	0.00171857	2	58188	0.00343713	13	58188	0.0223414	1	58188	0.00171857	0	58188	0	0	58188	0	5	58188	0.00859284	6	58188	0.0103114
Arabiibacter	0.638581	0.00824912	0.00426537	0.00730391	0.00618147	0.01203	0.0133752	1	58188	0.00171857	12	58188	0.0206228	4	58188	0.00687427	3	58188	0.0051557	0	58188	0	7	58188	0.01203	2	58188	0.00343713	5	58188	0.00859284	24	58188	0.0412456	0	58188	0	3	58188	0.0051557	2	58188	0.00343713	12	58188	0.0206228	3	58188	0.0051557
Brassicibacter	0.0182801	0.00824912	0.00478737	0.0380233	0.0329503	0.0716888	0.0398906	65	58188	0.111707	10	58188	0.0171857	21	58188	0.0360899	8	58188	0.0137485	9	58188	0.0154671	20	58188	0.0343713	39	58188	0.0670241	5	58188	0.00859284	72	58188	0.123737	77	58188	0.13233	23	58188	0.0395271	52	58188	0.0893655	21	58188	0.0360899	29	58188	0.0498385
Gp10	0.199837	0.00824912	0.00466236	0.0040816	0.00226328	0.00908386	0.00715777	2	58188	0.00343713	3	58188	0.0051557	2	58188	0.00343713	2	58188	0.00343713	0	58188	0	5	58188	0.00859284	2	58188	0.00343713	3	58188	0.0051557	15	58188	0.0257785	5	58188	0.00859284	6	58188	0.0103114	3	58188	0.0051557	3	58188	0.0051557	3	58188	0.0051557
Kiloniella	0.0227839	0.00824912	0.00724249	0.0436086	0.021239	0.0289701	0.0207132	46	58188	0.0790541	28	58188	0.0481199	22	58188	0.0378085	16	58188	0.0274971	18	58188	0.0309342	28	58188	0.0481199	40	58188	0.0687427	5	58188	0.00859284	4	58188	0.00687427	26	58188	0.0446828	23	58188	0.0395271	38	58188	0.0653056	14	58188	0.0240599	12	58188	0.0206228
Rhodothermus	0.396264	0.00824912	0.00502809	0.00472606	0.00409852	0.00834733	0.00625929	4	58188	0.00687427	0	58188	0	2	58188	0.00343713	0	58188	0	5	58188	0.00859284	0	58188	0	5	58188	0.00859284	6	58188	0.0103114	13	58188	0.0223414	6	58188	0.0103114	2	58188	0.00343713	4	58188	0.00687427	2	58188	0.00343713	2	58188	0.00343713
Burkholderia	0.176189	0.00790541	0.00415311	0.0124596	0.0161388	0.000982039	0.00125186	0	58188	0	0	58188	0	0	58188	0	3	58188	0.0051557	30	58188	0.051557	10	58188	0.0171857	6	58188	0.0103114	9	58188	0.0154671	1	58188	0.00171857	0	58188	0	2	58188	0.00343713	0	58188	0	0	58188	0	1	58188	0.00171857
Fodinicurvata	0.281568	0.00790541	0.0057102	0.0238451	0.0219317	0.0230779	0.0154222	22	58188	0.0378085	9	58188	0.0154671	15	58188	0.0257785	6	58188	0.0103114	4	58188	0.00687427	7	58188	0.01203	44	58188	0.075617	4	58188	0.00687427	0	58188	0	18	58188	0.0309342	27	58188	0.0464013	12	58188	0.0206228	20	58188	0.0343713	15	58188	0.0257785
Fudania	0.381565	0.00790541	0.0104027	0.00257785	0.00429642	0.00392815	0.00286311	1	58188	0.00171857	0	58188	0	0	58188	0	1	58188	0.00171857	8	58188	0.0137485	1	58188	0.00171857	0	58188	0	1	58188	0.00171857	3	58188	0.0051557	1	58188	0.00171857	1	58188	0.00171857	0	58188	0	4	58188	0.00687427	5	58188	0.00859284
Peptostreptococcaceae_incertae_sedis	0.308569	0.00790541	0.00481199	0.00665945	0.00539624	0.00368264	0.00266692	0	58188	0	3	58188	0.0051557	11	58188	0.0189042	1	58188	0.00171857	5	58188	0.00859284	3	58188	0.0051557	5	58188	0.00859284	3	58188	0.0051557	3	58188	0.0051557	1	58188	0.00171857	1	58188	0.00171857	5	58188	0.00859284	2	58188	0.00343713	3	58188	0.0051557
Tannerella	0.158339	0.00790541	0.0056058	0.0137485	0.00595329	0.00932937	0.00341955	10	58188	0.0171857	3	58188	0.0051557	6	58188	0.0103114	6	58188	0.0103114	13	58188	0.0223414	4	58188	0.00687427	11	58188	0.0189042	11	58188	0.0189042	5	58188	0.00859284	8	58188	0.0137485	4	58188	0.00687427	2	58188	0.00343713	5	58188	0.00859284	6	58188	0.0103114
Veillonella	0.706889	0.00790541	0.00318747	0.0109559	0.0072881	0.0103114	0.00588199	12	58188	0.0206228	0	58188	0	12	58188	0.0206228	6	58188	0.0103114	10	58188	0.0171857	2	58188	0.00343713	4	58188	0.00687427	5	58188	0.00859284	4	58188	0.00687427	13	58188	0.0223414	1	58188	0.00171857	5	58188	0.00859284	7	58188	0.01203	7	58188	0.01203
Acidovorax	0.246478	0.0075617	0.0067529	0.00322231	0.00290604	0.00392815	0.00271174	1	58188	0.00171857	1	58188	0.00171857	1	58188	0.00171857	6	58188	0.0103114	3	58188	0.0051557	1	58188	0.00171857	1	58188	0.00171857	1	58188	0.00171857	1	58188	0.00171857	4	58188	0.00687427	1	58188	0.00171857	0	58188	0	4	58188	0.00687427	4	58188	0.00687427
Capillibacterium	0.367474	0.0075617	0.0118369	0.00214821	0.00187277	0.00319163	0.0021403	2	58188	0.00343713	3	58188	0.0051557	0	58188	0	2	58188	0.00343713	0	58188	0	1	58188	0.00171857	0	58188	0	2	58188	0.00343713	1	58188	0.00171857	2	58188	0.00343713	1	58188	0.00171857	3	58188	0.0051557	0	58188	0	4	58188	0.00687427
Cerasicoccus	0.273135	0.0075617	0.00385817	0.00386678	0.0025418	0.00491019	0.00435044	4	58188	0.00687427	0	58188	0	4	58188	0.00687427	2	58188	0.00343713	2	58188	0.00343713	4	58188	0.00687427	1	58188	0.00171857	1	58188	0.00171857	8	58188	0.0137485	2	58188	0.00343713	1	58188	0.00171857	0	58188	0	5	58188	0.00859284	2	58188	0.00343713
Lachnobacterium	0.417095	0.0075617	0.00455987	0.0655204	0.132244	0.0105569	0.00539004	5	58188	0.00859284	5	58188	0.00859284	13	58188	0.0223414	0	58188	0	11	58188	0.0189042	241	58188	0.414175	23	58188	0.0395271	7	58188	0.01203	9	58188	0.0154671	4	58188	0.00687427	4	58188	0.00687427	1	58188	0.00171857	7	58188	0.01203	7	58188	0.01203
Methanosphaera	0.920304	0.0075617	0.0113269	0.00622981	0.00968125	0.0051557	0.00687427	0	58188	0	8	58188	0.0137485	17	58188	0.0292156	1	58188	0.00171857	0	58188	0	1	58188	0.00171857	2	58188	0.00343713	0	58188	0	12	58188	0.0206228	1	58188	0.00171857	1	58188	0.00171857	2	58188	0.00343713	0	58188	0	5	58188	0.00859284
Parcubacteria_genera_incertae_sedis	0.968914	0.0075617	0.0056058	0.00687427	0.00478429	0.00687427	0.00440551	5	58188	0.00859284	0	58188	0	8	58188	0.0137485	1	58188	0.00171857	1	58188	0.00171857	7	58188	0.01203	5	58188	0.00859284	5	58188	0.00859284	1	58188	0.00171857	7	58188	0.01203	5	58188	0.00859284	0	58188	0	3	58188	0.0051557	5	58188	0.00859284
Succinatimonas	0.00350895	0.0075617	0.00733971	0.0116003	0.0117112	0.0351079	0.0156396	2	58188	0.00343713	1	58188	0.00171857	0	58188	0	8	58188	0.0137485	21	58188	0.0360899	1	58188	0.00171857	12	58188	0.0206228	9	58188	0.0154671	12	58188	0.0206228	15	58188	0.0257785	23	58188	0.0395271	15	58188	0.0257785	11	58188	0.0189042	31	58188	0.0532756
Aquimarina	0.138708	0.00721798	0.00980638	0.00171857	0.00284992	0.000491019	0.00077637	0	58188	0	0	58188	0	0	58188	0	5	58188	0.00859284	2	58188	0.00343713	1	58188	0.00171857	0	58188	0	0	58188	0	1	58188	0.00171857	0	58188	0	0	58188	0	0	58188	0	0	58188	0	1	58188	0.00171857
Corynebacterium	0.199102	0.00721798	0.00440168	0.00257785	0.00271729	0.00589223	0.00550073	0	58188	0	0	58188	0	2	58188	0.00343713	4	58188	0.00687427	1	58188	0.00171857	4	58188	0.00687427	0	58188	0	1	58188	0.00171857	10	58188	0.0171857	5	58188	0.00859284	3	58188	0.0051557	0	58188	0	4	58188	0.00687427	0	58188	0
Kineococcus	0.260712	0.00721798	0.00514423	0.00300749	0.00223248	0.0051557	0.00468403	0	58188	0	1	58188	0.00171857	2	58188	0.00343713	2	58188	0.00343713	4	58188	0.00687427	3	58188	0.0051557	2	58188	0.00343713	0	58188	0	1	58188	0.00171857	2	58188	0.00343713	4	58188	0.00687427	2	58188	0.00343713	3	58188	0.0051557	0	58188	0
Mariniphaga	0.3401	0.00721798	0.00771635	0.00236303	0.0044598	0.00343713	0.00378754	2	58188	0.00343713	0	58188	0	0	58188	0	0	58188	0	0	58188	0	0	58188	0	1	58188	0.00171857	8	58188	0.0137485	0	58188	0	1	58188	0.00171857	0	58188	0	0	58188	0	3	58188	0.0051557	4	58188	0.00687427
Pseudoflavonifractor	0.203901	0.00721798	0.00707749	0.0178301	0.0117171	0.013012	0.00704745	11	58188	0.0189042	5	58188	0.00859284	13	58188	0.0223414	6	58188	0.0103114	4	58188	0.00687427	15	58188	0.0257785	25	58188	0.0429642	4	58188	0.00687427	5	58188	0.00859284	12	58188	0.0206228	14	58188	0.0240599	3	58188	0.0051557	10	58188	0.0171857	6	58188	0.0103114
Verticiella	0.868957	0.00721798	0.00397877	0.00880766	0.00852544	0.011539	0.0202035	10	58188	0.0171857	15	58188	0.0257785	5	58188	0.00859284	0	58188	0	7	58188	0.01203	2	58188	0.00343713	2	58188	0.00343713	0	58188	0	7	58188	0.01203	1	58188	0.00171857	0	58188	0	35	58188	0.0601499	2	58188	0.00343713	0	58188	0
Anaerosporobacter	0.320885	0.00687427	0.00498088	0.0223414	0.0160527	0.0491019	0.0726858	14	58188	0.0240599	2	58188	0.00343713	34	58188	0.0584313	9	58188	0.0154671	8	58188	0.0137485	7	58188	0.01203	10	58188	0.0171857	20	58188	0.0343713	26	58188	0.0446828	131	58188	0.225132	11	58188	0.0189042	7	58188	0.01203	6	58188	0.0103114	12	58188	0.0206228
Cellulosibacter	0.757616	0.00687427	0.0046114	0.0092373	0.00654058	0.00785631	0.00377159	4	58188	0.00687427	4	58188	0.00687427	0	58188	0	3	58188	0.0051557	7	58188	0.01203	5	58188	0.00859284	14	58188	0.0240599	6	58188	0.0103114	5	58188	0.00859284	6	58188	0.0103114	3	58188	0.0051557	0	58188	0	6	58188	0.0103114	5	58188	0.00859284
Henriciella	0.733358	0.00687427	0.0036049	0.00494088	0.00415999	0.00589223	0.00398906	5	58188	0.00859284	6	58188	0.0103114	5	58188	0.00859284	0	58188	0	1	58188	0.00171857	0	58188	0	1	58188	0.00171857	5	58188	0.00859284	6	58188	0.0103114	5	58188	0.00859284	0	58188	0	5	58188	0.00859284	5	58188	0.00859284	0	58188	0
Microbacterium	0.0811388	0.00687427	0.00543459	0.00472606	0.00362023	0.0127665	0.00826022	4	58188	0.00687427	6	58188	0.0103114	5	58188	0.00859284	1	58188	0.00171857	3	58188	0.0051557	3	58188	0.0051557	0	58188	0	0	58188	0	16	58188	0.0274971	2	58188	0.00343713	10	58188	0.0171857	11	58188	0.0189042	3	58188	0.0051557	7	58188	0.01203
Petroclostridium	0.214131	0.00687427	0.00966073	0.0010741	0.00147274	0.00294612	0.0023803	0	58188	0	0	58188	0	2	58188	0.00343713	0	58188	0	0	58188	0	0	58188	0	2	58188	0.00343713	1	58188	0.00171857	2	58188	0.00343713	1	58188	0.00171857	2	58188	0.00343713	0	58188	0	4	58188	0.00687427	0	58188	0
Thermocaproicibacter	0.953786	0.00687427	0.00473776	0.00773355	0.00543459	0.0076108	0.00365801	2	58188	0.00343713	9	58188	0.0154671	2	58188	0.00343713	0	58188	0	6	58188	0.0103114	7	58188	0.01203	2	58188	0.00343713	8	58188	0.0137485	8	58188	0.0137485	3	58188	0.0051557	1	58188	0.00171857	3	58188	0.0051557	6	58188	0.0103114	5	58188	0.00859284
Enorma	0.862029	0.00653056	0.0035052	0.00472606	0.00686083	0.00589223	0.00518485	1	58188	0.00171857	13	58188	0.0223414	2	58188	0.00343713	1	58188	0.00171857	0	58188	0	3	58188	0.0051557	2	58188	0.00343713	0	58188	0	8	58188	0.0137485	0	58188	0	0	58188	0	1	58188	0.00171857	6	58188	0.0103114	3	58188	0.0051557
Neisseria	0.37566	0.00653056	0.00547789	0.00945212	0.00810647	0.00466468	0.0023803	2	58188	0.00343713	7	58188	0.01203	0	58188	0	2	58188	0.00343713	13	58188	0.0223414	12	58188	0.0206228	1	58188	0.00171857	7	58188	0.01203	1	58188	0.00171857	1	58188	0.00171857	5	58188	0.00859284	3	58188	0.0051557	3	58188	0.0051557	4	58188	0.00687427
Parvularcula	0.269854	0.00653056	0.00502809	0.00365196	0.00249599	0.00319163	0.00250372	1	58188	0.00171857	1	58188	0.00171857	2	58188	0.00343713	1	58188	0.00171857	2	58188	0.00343713	4	58188	0.00687427	5	58188	0.00859284	1	58188	0.00171857	1	58188	0.00171857	5	58188	0.00859284	0	58188	0	1	58188	0.00171857	2	58188	0.00343713	2	58188	0.00343713
Rubneribacter	0.314369	0.00653056	0.01222	0.000859284	0.00171857	0.000982039	0.00240549	0	58188	0	0	58188	0	3	58188	0.0051557	0	58188	0	0	58188	0	0	58188	0	0	58188	0	1	58188	0.00171857	0	58188	0	0	58188	0	0	58188	0	0	58188	0	0	58188	0	0	58188	0
Syntrophomonas	0.301203	0.00653056	0.00478737	0.00665945	0.00616278	0.00270061	0.00240549	9	58188	0.0154671	0	58188	0	1	58188	0.00171857	1	58188	0.00171857	1	58188	0.00171857	3	58188	0.0051557	9	58188	0.0154671	7	58188	0.01203	4	58188	0.00687427	0	58188	0	2	58188	0.00343713	1	58188	0.00171857	1	58188	0.00171857	3	58188	0.0051557
Syntrophotalea	0.731743	0.00653056	0.00514423	0.0051557	0.00420961	0.00441917	0.00329386	5	58188	0.00859284	8	58188	0.0137485	3	58188	0.0051557	0	58188	0	2	58188	0.00343713	4	58188	0.00687427	1	58188	0.00171857	1	58188	0.00171857	5	58188	0.00859284	4	58188	0.00687427	1	58188	0.00171857	2	58188	0.00343713	1	58188	0.00171857	5	58188	0.00859284
Acetonema	0.602869	0.00618684	0.00468763	0.0131041	0.00846024	0.0144851	0.0204555	16	58188	0.0274971	2	58188	0.00343713	11	58188	0.0189042	12	58188	0.0206228	9	58188	0.0154671	6	58188	0.0103114	1	58188	0.00171857	4	58188	0.00687427	3	58188	0.0051557	37	58188	0.063587	6	58188	0.0103114	1	58188	0.00171857	1	58188	0.00171857	8	58188	0.0137485
Desulfonauticus	0.740345	0.00618684	0.00648517	0.00902248	0.00997473	0.00613774	0.00354079	5	58188	0.00859284	1	58188	0.00171857	1	58188	0.00171857	3	58188	0.0051557	0	58188	0	11	58188	0.0189042	3	58188	0.0051557	18	58188	0.0309342	4	58188	0.00687427	4	58188	0.00687427	1	58188	0.00171857	2	58188	0.00343713	3	58188	0.0051557	3	58188	0.0051557
Enteroscipio	0.0998692	0.00618684	0.00832042	0.000214821	0.000568363	0.00122755	0.00199453	0	58188	0	1	58188	0.00171857	0	58188	0	0	58188	0	0	58188	0	0	58188	0	0	58188	0	0	58188	0	2	58188	0.00343713	0	58188	0	0	58188	0	0	58188	0	0	58188	0	3	58188	0.0051557
Lentisphaera	0.376318	0.00618684	0.00385817	0.00322231	0.00263976	0.00491019	0.00383498	1	58188	0.00171857	4	58188	0.00687427	0	58188	0	0	58188	0	1	58188	0.00171857	3	58188	0.0051557	2	58188	0.00343713	4	58188	0.00687427	1	58188	0.00171857	5	58188	0.00859284	1	58188	0.00171857	0	58188	0	2	58188	0.00343713	5	58188	0.00859284
Limisphaera	0.0574157	0.00618684	0.00442844	0.00128893	0.001664	0.00171857	0.00355777	0	58188	0	0	58188	0	0	58188	0	1	58188	0.00171857	1	58188	0.00171857	3	58188	0.0051557	0	58188	0	1	58188	0.00171857	6	58188	0.0103114	0	58188	0	0	58188	0	0	58188	0	0	58188	0	0	58188	0
Posidoniimonas	0.470006	0.00618684	0.000841923	0.0131041	0.0171413	0.0186587	0.0190361	5	58188	0.00859284	33	58188	0.0567127	7	58188	0.01203	0	58188	0	0	58188	0	3	58188	0.0051557	5	58188	0.00859284	8	58188	0.0137485	28	58188	0.0481199	25	58188	0.0429642	1	58188	0.00171857	16	58188	0.0274971	1	58188	0.00171857	4	58188	0.00687427
Pseudoramibacter	0.0722173	0.00618684	0.00299642	0.0163264	0.0120912	0.0196408	0.00667858	8	58188	0.0137485	26	58188	0.0446828	8	58188	0.0137485	2	58188	0.00343713	14	58188	0.0240599	5	58188	0.00859284	8	58188	0.0137485	5	58188	0.00859284	8	58188	0.0137485	10	58188	0.0171857	9	58188	0.0154671	19	58188	0.0326528	13	58188	0.0223414	14	58188	0.0240599
Pullulanibacillus	0.672837	0.00618684	0.00657563	0.00429642	0.0040304	0.00368264	0.00282069	5	58188	0.00859284	3	58188	0.0051557	1	58188	0.00171857	0	58188	0	0	58188	0	3	58188	0.0051557	7	58188	0.01203	1	58188	0.00171857	5	58188	0.00859284	3	58188	0.0051557	2	58188	0.00343713	0	58188	0	0	58188	0	2	58188	0.00343713
Putridiphycobacter	0.117619	0.00618684	0.00442844	0.00193339	0.00218019	0.00417366	0.00302685	0	58188	0	1	58188	0.00171857	0	58188	0	0	58188	0	1	58188	0.00171857	1	58188	0.00171857	2	58188	0.00343713	4	58188	0.00687427	2	58188	0.00343713	5	58188	0.00859284	0	58188	0	1	58188	0.00171857	2	58188	0.00343713	2	58188	0.00343713
Aeromonas	0.0884728	0.00584313	0.00648517	0.0262082	0.0314637	0.000736529	0.00180412	1	58188	0.00171857	0	58188	0	1	58188	0.00171857	25	58188	0.0429642	59	58188	0.101395	11	58188	0.0189042	13	58188	0.0223414	12	58188	0.0206228	0	58188	0	0	58188	0	3	58188	0.0051557	0	58188	0	0	58188	0	0	58188	0
Anaerotaenia	0.0181237	0.00584313	0.0067529	0.00300749	0.00281735	0.0220959	0.017704	3	58188	0.0051557	0	58188	0	2	58188	0.00343713	5	58188	0.00859284	0	58188	0	2	58188	0.00343713	2	58188	0.00343713	0	58188	0	28	58188	0.0481199	26	58188	0.0446828	1	58188	0.00171857	18	58188	0.0309342	9	58188	0.0154671	3	58188	0.0051557
Anaerotruncus	0.486742	0.00584313	0.00279234	0.00708909	0.00591831	0.0117845	0.0126097	8	58188	0.0137485	2	58188	0.00343713	3	58188	0.0051557	0	58188	0	10	58188	0.0171857	7	58188	0.01203	2	58188	0.00343713	1	58188	0.00171857	8	58188	0.0137485	4	58188	0.00687427	2	58188	0.00343713	1	58188	0.00171857	3	58188	0.0051557	6	58188	0.0103114
Apibacter	0.29086	0.00584313	0.00279234	0.0122448	0.0132686	0.00491019	0.00266692	1	58188	0.00171857	1	58188	0.00171857	2	58188	0.00343713	0	58188	0	24	58188	0.0412456	6	58188	0.0103114	12	58188	0.0206228	11	58188	0.0189042	0	58188	0	4	58188	0.00687427	5	58188	0.00859284	2	58188	0.00343713	4	58188	0.00687427	3	58188	0.0051557
Butyribacter	0.733365	0.00584313	0.00353875	0.00859284	0.00589095	0.00662876	0.00743047	9	58188	0.0154671	2	58188	0.00343713	10	58188	0.0171857	4	58188	0.00687427	0	58188	0	5	58188	0.00859284	8	58188	0.0137485	2	58188	0.00343713	11	58188	0.0189042	3	58188	0.0051557	10	58188	0.0171857	0	58188	0	1	58188	0.00171857	0	58188	0
Coraliomargarita	0.686371	0.00584313	0.00610998	0.0109559	0.0218896	0.00417366	0.00354079	0	58188	0	0	58188	0	1	58188	0.00171857	0	58188	0	1	58188	0.00171857	39	58188	0.0670241	10	58188	0.0171857	0	58188	0	3	58188	0.0051557	1	58188	0.00171857	2	58188	0.00343713	2	58188	0.00343713	2	58188	0.00343713	7	58188	0.01203
Dethiosulfovibrio	0.784969	0.00584313	0.00353875	0.00730391	0.00444425	0.00613774	0.00302685	4	58188	0.00687427	0	58188	0	4	58188	0.00687427	8	58188	0.0137485	6	58188	0.0103114	7	58188	0.01203	4	58188	0.00687427	1	58188	0.00171857	0	58188	0	3	58188	0.0051557	6	58188	0.0103114	3	58188	0.0051557	5	58188	0.00859284	4	58188	0.00687427
Faecalicoccus	0.16472	0.00584313	0.00257212	0.0081632	0.00717643	0.0147306	0.00997265	5	58188	0.00859284	14	58188	0.0240599	1	58188	0.00171857	6	58188	0.0103114	0	58188	0	3	58188	0.0051557	7	58188	0.01203	2	58188	0.00343713	12	58188	0.0206228	13	58188	0.0223414	0	58188	0	9	58188	0.0154671	0	58188	0	10	58188	0.0171857
Lachnotalea	0.662307	0.00584313	0.00370191	0.0040816	0.00411538	0.00392815	0.00271174	0	58188	0	0	58188	0	4	58188	0.00687427	1	58188	0.00171857	4	58188	0.00687427	3	58188	0.0051557	7	58188	0.01203	0	58188	0	4	58188	0.00687427	0	58188	0	3	58188	0.0051557	4	58188	0.00687427	2	58188	0.00343713	0	58188	0
Seramator	0.765096	0.00584313	0.00601253	0.00537052	0.003265	0.00736529	0.00564138	5	58188	0.00859284	1	58188	0.00171857	1	58188	0.00171857	2	58188	0.00343713	3	58188	0.0051557	3	58188	0.0051557	7	58188	0.01203	3	58188	0.0051557	2	58188	0.00343713	5	58188	0.00859284	5	58188	0.00859284	0	58188	0	5	58188	0.00859284	11	58188	0.0189042
Caecibacterium	0.656661	0.00549942	0.00333243	0.0040816	0.00393187	0.00687427	0.00751917	8	58188	0.0137485	2	58188	0.00343713	3	58188	0.0051557	2	58188	0.00343713	2	58188	0.00343713	1	58188	0.00171857	1	58188	0.00171857	0	58188	0	12	58188	0.0206228	2	58188	0.00343713	9	58188	0.0154671	1	58188	0.00171857	0	58188	0	4	58188	0.00687427
Eggerthella	0.0483957	0.00549942	0.00227994	0.00150375	0.00181011	0.00613774	0.00484843	0	58188	0	3	58188	0.0051557	2	58188	0.00343713	0	58188	0	0	58188	0	1	58188	0.00171857	0	58188	0	1	58188	0.00171857	9	58188	0.0154671	2	58188	0.00343713	0	58188	0	2	58188	0.00343713	4	58188	0.00687427	2	58188	0.00343713
Glutamicibacter	0.905421	0.00549942	0.00466236	0.00601499	0.00271729	0.0051557	0.00318217	1	58188	0.00171857	4	58188	0.00687427	3	58188	0.0051557	5	58188	0.00859284	1	58188	0.00171857	5	58188	0.00859284	4	58188	0.00687427	5	58188	0.00859284	1	58188	0.00171857	4	58188	0.00687427	3	58188	0.0051557	3	58188	0.0051557	0	58188	0	4	58188	0.00687427
Novibacillus	0.844511	0.00549942	0.00502809	0.00365196	0.00662471	0.00368264	0.00463227	1	58188	0.00171857	12	58188	0.0206228	0	58188	0	3	58188	0.0051557	0	58188	0	1	58188	0.00171857	0	58188	0	0	58188	0	3	58188	0.0051557	0	58188	0	0	58188	0	7	58188	0.01203	0	58188	0	0	58188	0
Armatimonadetes_gp2	0.245705	0.0051557	0.00420961	0.0133189	0.00963586	0.0122755	0.0077637	3	58188	0.0051557	8	58188	0.0137485	11	58188	0.0189042	4	58188	0.00687427	3	58188	0.0051557	6	58188	0.0103114	6	58188	0.0103114	21	58188	0.0360899	2	58188	0.00343713	11	58188	0.0189042	7	58188	0.01203	2	58188	0.00343713	4	58188	0.00687427	15	58188	0.0257785
Cryptobacterium	0.198326	0.0051557	0.00343713	0.00150375	0.00181011	0.00270061	0.00398906	2	58188	0.00343713	0	58188	0	1	58188	0.00171857	0	58188	0	0	58188	0	1	58188	0.00171857	0	58188	0	3	58188	0.0051557	2	58188	0.00343713	0	58188	0	1	58188	0.00171857	1	58188	0.00171857	0	58188	0	0	58188	0
Deinococcus	0.752853	0.0051557	0.0036049	0.00386678	0.00294548	0.0051557	0.00378754	4	58188	0.00687427	1	58188	0.00171857	4	58188	0.00687427	0	58188	0	1	58188	0.00171857	2	58188	0.00343713	5	58188	0.00859284	1	58188	0.00171857	2	58188	0.00343713	1	58188	0.00171857	6	58188	0.0103114	2	58188	0.00343713	4	58188	0.00687427	6	58188	0.0103114
Facklamia	0.920456	0.0051557	0.0065215	0.00622981	0.00960468	0.00466468	0.00199453	2	58188	0.00343713	0	58188	0	0	58188	0	4	58188	0.00687427	3	58188	0.0051557	18	58188	0.0309342	1	58188	0.00171857	1	58188	0.00171857	3	58188	0.0051557	3	58188	0.0051557	4	58188	0.00687427	3	58188	0.0051557	4	58188	0.00687427	1	58188	0.00171857
Falcatimonas	0.0188389	0.0051557	0.00243042	0.0133189	0.00722769	0.00491019	0.00394347	16	58188	0.0274971	5	58188	0.00859284	3	58188	0.0051557	7	58188	0.01203	5	58188	0.00859284	13	58188	0.0223414	5	58188	0.00859284	8	58188	0.0137485	2	58188	0.00343713	0	58188	0	4	58188	0.00687427	6	58188	0.0103114	1	58188	0.00171857	1	58188	0.00171857
Filobacterium	0.602532	0.0051557	0.0018826	0.00580016	0.00500583	0.00368264	0.0029665	3	58188	0.0051557	1	58188	0.00171857	1	58188	0.00171857	1	58188	0.00171857	9	58188	0.0154671	7	58188	0.01203	1	58188	0.00171857	4	58188	0.00687427	1	58188	0.00171857	6	58188	0.0103114	2	58188	0.00343713	1	58188	0.00171857	1	58188	0.00171857	3	58188	0.0051557
Pleomorphochaeta	0.526961	0.0051557	0.00343713	0.00945212	0.00876301	0.00932937	0.00518485	5	58188	0.00859284	3	58188	0.0051557	1	58188	0.00171857	4	58188	0.00687427	3	58188	0.0051557	1	58188	0.00171857	17	58188	0.0292156	10	58188	0.0171857	5	58188	0.00859284	12	58188	0.0206228	4	58188	0.00687427	6	58188	0.0103114	2	58188	0.00343713	3	58188	0.0051557
Acetobacterium	0.661212	0.00481199	0.00128606	0.00580016	0.00343042	0.00417366	0.00377159	7	58188	0.01203	0	58188	0	2	58188	0.00343713	2	58188	0.00343713	3	58188	0.0051557	4	58188	0.00687427	4	58188	0.00687427	5	58188	0.00859284	6	58188	0.0103114	3	58188	0.0051557	0	58188	0	0	58188	0	1	58188	0.00171857	2	58188	0.00343713
Aromatoleum	0.873934	0.00481199	0.00200418	0.00644463	0.00568363	0.00466468	0.00935517	11	58188	0.0189042	0	58188	0	4	58188	0.00687427	5	58188	0.00859284	3	58188	0.0051557	2	58188	0.00343713	0	58188	0	5	58188	0.00859284	1	58188	0.00171857	0	58188	0	0	58188	0	1	58188	0.00171857	1	58188	0.00171857	16	58188	0.0274971
Breznakia	0.081666	0.00481199	0.00315019	0.0403863	0.0317354	0.128156	0.141365	58	58188	0.0996769	7	58188	0.01203	32	58188	0.0549942	13	58188	0.0223414	9	58188	0.0154671	13	58188	0.0223414	47	58188	0.0807727	9	58188	0.0154671	45	58188	0.0773355	34	58188	0.0584313	9	58188	0.0154671	37	58188	0.063587	5	58188	0.00859284	245	58188	0.421049
Quadrisphaera	0.377003	0.00481199	0.00426537	0.00128893	0.00223248	0.00343713	0.00543459	1	58188	0.00171857	0	58188	0	4	58188	0.00687427	1	58188	0.00171857	0	58188	0	0	58188	0	0	58188	0	0	58188	0	9	58188	0.0154671	0	58188	0	0	58188	0	0	58188	0	4	58188	0.00687427	0	58188	0
Aerococcus	0.286301	0.00446828	0.00415311	0.00150375	0.00159315	0.00270061	0.00302685	0	58188	0	0	58188	0	1	58188	0.00171857	1	58188	0.00171857	1	58188	0.00171857	1	58188	0.00171857	0	58188	0	3	58188	0.0051557	0	58188	0	0	58188	0	3	58188	0.0051557	0	58188	0	5	58188	0.00859284	2	58188	0.00343713
Bulleidia	0.0657901	0.00446828	0.00385817	0.0232007	0.0159836	0.0272516	0.0180111	22	58188	0.0378085	19	58188	0.0326528	10	58188	0.0171857	7	58188	0.01203	8	58188	0.0137485	8	58188	0.0137485	32	58188	0.0549942	2	58188	0.00343713	33	58188	0.0567127	30	58188	0.051557	4	58188	0.00687427	9	58188	0.0154671	7	58188	0.01203	13	58188	0.0223414
Enterobacter	0.268447	0.00446828	0.00257212	0.0517718	0.0621865	0.103605	0.143188	85	58188	0.146078	84	58188	0.14436	58	58188	0.0996769	2	58188	0.00343713	9	58188	0.0154671	2	58188	0.00343713	1	58188	0.00171857	0	58188	0	81	58188	0.139204	15	58188	0.0257785	2	58188	0.00343713	255	58188	0.438235	37	58188	0.063587	3	58188	0.0051557
Heliorestis	0.640865	0.00446828	0.00299642	0.00429642	0.00309819	0.00613774	0.00457992	1	58188	0.00171857	4	58188	0.00687427	5	58188	0.00859284	3	58188	0.0051557	0	58188	0	0	58188	0	3	58188	0.0051557	4	58188	0.00687427	7	58188	0.01203	2	58188	0.00343713	3	58188	0.0051557	3	58188	0.0051557	0	58188	0	8	58188	0.0137485
Mojavia	0.00377389	0.00446828	0.00233118	0.00128893	0.00142496	0.000491019	0.00120275	0	58188	0	0	58188	0	1	58188	0.00171857	0	58188	0	2	58188	0.00343713	0	58188	0	1	58188	0.00171857	2	58188	0.00343713	0	58188	0	0	58188	0	2	58188	0.00343713	0	58188	0	0	58188	0	0	58188	0
Peptostreptococcus	0.737821	0.00446828	0.00385817	0.00343713	0.00121521	0.00441917	0.00257493	2	58188	0.00343713	2	58188	0.00343713	1	58188	0.00171857	1	58188	0.00171857	2	58188	0.00343713	2	58188	0.00343713	3	58188	0.0051557	3	58188	0.0051557	1	58188	0.00171857	5	58188	0.00859284	1	58188	0.00171857	3	58188	0.0051557	4	58188	0.00687427	1	58188	0.00171857
Sandaracinus	0.523218	0.00446828	0.00528023	0.00665945	0.004501	0.0076108	0.00316317	3	58188	0.0051557	2	58188	0.00343713	3	58188	0.0051557	3	58188	0.0051557	2	58188	0.00343713	2	58188	0.00343713	10	58188	0.0171857	6	58188	0.0103114	4	58188	0.00687427	3	58188	0.0051557	2	58188	0.00343713	4	58188	0.00687427	4	58188	0.00687427	8	58188	0.0137485
Schlesneria	0.0342563	0.00446828	0.00505154	0.00773355	0.00536622	0.0179222	0.0115416	2	58188	0.00343713	5	58188	0.00859284	8	58188	0.0137485	2	58188	0.00343713	3	58188	0.0051557	2	58188	0.00343713	11	58188	0.0189042	3	58188	0.0051557	3	58188	0.0051557	23	58188	0.0395271	1	58188	0.00171857	13	58188	0.0223414	13	58188	0.0223414	10	58188	0.0171857
Sharpea	0.442071	0.00446828	0.00336769	0.00365196	0.00424781	0.00736529	0.00697869	1	58188	0.00171857	1	58188	0.00171857	7	58188	0.01203	0	58188	0	0	58188	0	0	58188	0	3	58188	0.0051557	5	58188	0.00859284	4	58188	0.00687427	2	58188	0.00343713	2	58188	0.00343713	4	58188	0.00687427	2	58188	0.00343713	2	58188	0.00343713
Thomasclavelia	0.198848	0.00446828	0.00581272	0.0163264	0.00754018	0.0397726	0.0514048	3	58188	0.0051557	14	58188	0.0240599	5	58188	0.00859284	9	58188	0.0154671	7	58188	0.01203	14	58188	0.0240599	16	58188	0.0274971	8	58188	0.0137485	5	58188	0.00859284	95	58188	0.163264	8	58188	0.0137485	23	58188	0.0395271	7	58188	0.01203	16	58188	0.0274971
Williamwhitmania	0.775302	0.00446828	0.00725879	0.00236303	0.00226328	0.00319163	0.00454027	4	58188	0.00687427	1	58188	0.00171857	0	58188	0	1	58188	0.00171857	1	58188	0.00171857	3	58188	0.0051557	0	58188	0	1	58188	0.00171857	0	58188	0	1	58188	0.00171857	0	58188	0	0	58188	0	2	58188	0.00343713	8	58188	0.0137485
Acetitomaculum	0.221965	0.00412456	0.00442844	0.000644463	0.00119607	0.00294612	0.00386629	0	58188	0	0	58188	0	2	58188	0.00343713	0	58188	0	0	58188	0	0	58188	0	1	58188	0.00171857	0	58188	0	4	58188	0.00687427	0	58188	0	6	58188	0.0103114	0	58188	0	0	58188	0	0	58188	0
Brevundimonas	0.253696	0.00412456	0.0017526	0.010741	0.00818578	0.0299522	0.0422847	11	58188	0.0189042	14	58188	0.0240599	8	58188	0.0137485	2	58188	0.00343713	10	58188	0.0171857	2	58188	0.00343713	1	58188	0.00171857	2	58188	0.00343713	24	58188	0.0412456	3	58188	0.0051557	4	58188	0.00687427	75	58188	0.128893	11	58188	0.0189042	1	58188	0.00171857
Ellagibacter	0.289753	0.00412456	0.00468763	0.000859284	0.00171857	0.00466468	0.00614265	0	58188	0	0	58188	0	0	58188	0	0	58188	0	0	58188	0	3	58188	0.0051557	1	58188	0.00171857	0	58188	0	5	58188	0.00859284	0	58188	0	0	58188	0	0	58188	0	4	58188	0.00687427	0	58188	0
Ethanoligenens	0.210845	0.00412456	0.00279234	0.010741	0.0086677	0.00638325	0.00386629	5	58188	0.00859284	6	58188	0.0103114	1	58188	0.00171857	2	58188	0.00343713	3	58188	0.0051557	9	58188	0.0154671	18	58188	0.0309342	6	58188	0.0103114	0	58188	0	7	58188	0.01203	2	58188	0.00343713	5	58188	0.00859284	5	58188	0.00859284	5	58188	0.00859284
Fusibacter	0.187354	0.00412456	0.00299642	0.00150375	0.00159315	0.00220959	0.0021959	0	58188	0	1	58188	0.00171857	0	58188	0	0	58188	0	2	58188	0.00343713	2	58188	0.00343713	0	58188	0	2	58188	0.00343713	0	58188	0	2	58188	0.00343713	4	58188	0.00687427	1	58188	0.00171857	1	58188	0.00171857	0	58188	0
Gp13	0.54209	0.00412456	0.00400835	0.00429642	0.0040304	0.00220959	0.0023803	4	58188	0.00687427	0	58188	0	6	58188	0.0103114	5	58188	0.00859284	0	58188	0	4	58188	0.00687427	0	58188	0	1	58188	0.00171857	0	58188	0	0	58188	0	4	58188	0.00687427	0	58188	0	1	58188	0.00171857	2	58188	0.00343713
Gp17	0.0453664	0.00412456	0.00336769	0.00171857	0.00148832	0.00711978	0.0049833	3	58188	0.0051557	1	58188	0.00171857	0	58188	0	1	58188	0.00171857	1	58188	0.00171857	0	58188	0	1	58188	0.00171857	1	58188	0.00171857	2	58188	0.00343713	5	58188	0.00859284	7	58188	0.01203	0	58188	0	2	58188	0.00343713	4	58188	0.00687427
Lacticaseibacillus	0.0612954	0.00412456	0.00493322	0.0161116	0.00703026	0.0186587	0.0131983	14	58188	0.0240599	10	58188	0.0171857	16	58188	0.0274971	6	58188	0.0103114	5	58188	0.00859284	8	58188	0.0137485	12	58188	0.0206228	4	58188	0.00687427	25	58188	0.0429642	19	58188	0.0326528	9	58188	0.0154671	5	58188	0.00859284	11	58188	0.0189042	3	58188	0.0051557
Laspinema	0.174297	0.00412456	0.00299642	0.00257785	0.00121521	0.00171857	0.00159108	1	58188	0.00171857	1	58188	0.00171857	1	58188	0.00171857	1	58188	0.00171857	3	58188	0.0051557	1	58188	0.00171857	2	58188	0.00343713	2	58188	0.00343713	3	58188	0.0051557	0	58188	0	1	58188	0.00171857	0	58188	0	1	58188	0.00171857	1	58188	0.00171857
Mariniflexile	0.0404234	0.00412456	0.00206228	0.00128893	0.00113673	0.00564672	0.00428061	1	58188	0.00171857	2	58188	0.00343713	0	58188	0	0	58188	0	0	58188	0	1	58188	0.00171857	1	58188	0.00171857	1	58188	0.00171857	1	58188	0.00171857	6	58188	0.0103114	6	58188	0.0103114	0	58188	0	1	58188	0.00171857	3	58188	0.0051557
Paradesulfitobacterium	0.809787	0.00412456	0.00468763	0.0051557	0.00543459	0.00343713	0.00378754	10	58188	0.0171857	1	58188	0.00171857	3	58188	0.0051557	5	58188	0.00859284	0	58188	0	4	58188	0.00687427	0	58188	0	1	58188	0.00171857	7	58188	0.01203	2	58188	0.00343713	0	58188	0	1	58188	0.00171857	2	58188	0.00343713	0	58188	0
Peptoniphilus	0.581914	0.00412456	0.00206228	0.0051557	0.00321515	0.00638325	0.00428061	4	58188	0.00687427	1	58188	0.00171857	5	58188	0.00859284	3	58188	0.0051557	2	58188	0.00343713	6	58188	0.0103114	0	58188	0	3	58188	0.0051557	9	58188	0.0154671	2	58188	0.00343713	4	58188	0.00687427	3	58188	0.0051557	1	58188	0.00171857	2	58188	0.00343713
Psittacicella	0.0979425	0.00412456	0.00400835	0.00193339	0.00218019	0.000491019	0.00077637	0	58188	0	0	58188	0	0	58188	0	1	58188	0.00171857	1	58188	0.00171857	1	58188	0.00171857	2	58188	0.00343713	4	58188	0.00687427	0	58188	0	0	58188	0	0	58188	0	0	58188	0	0	58188	0	1	58188	0.00171857
Selenihalanaerobacter	0.345104	0.00412456	0.00400835	0.00601499	0.00863569	0.0122755	0.0123733	0	58188	0	13	58188	0.0223414	0	58188	0	0	58188	0	3	58188	0.0051557	1	58188	0.00171857	11	58188	0.0189042	0	58188	0	2	58188	0.00343713	24	58188	0.0412456	3	58188	0.0051557	5	58188	0.00859284	9	58188	0.0154671	3	58188	0.0051557
Actinobacillus	0.16281	0.00378085	0.00382743	0.0146078	0.0110711	0.00883835	0.00854007	9	58188	0.0154671	1	58188	0.00171857	8	58188	0.0137485	22	58188	0.0378085	12	58188	0.0206228	10	58188	0.0171857	0	58188	0	6	58188	0.0103114	3	58188	0.0051557	2	58188	0.00343713	2	58188	0.00343713	16	58188	0.0274971	7	58188	0.01203	6	58188	0.0103114
Anaerobranca	0.0754737	0.00378085	0.00200418	0.0247044	0.0249183	0.0603954	0.0577005	6	58188	0.0103114	26	58188	0.0446828	3	58188	0.0051557	21	58188	0.0360899	4	58188	0.00687427	4	58188	0.00687427	46	58188	0.0790541	5	58188	0.00859284	13	58188	0.0223414	19	58188	0.0326528	5	58188	0.00859284	15	58188	0.0257785	26	58188	0.0446828	106	58188	0.182168
Bombilactobacillus	0.315456	0.00378085	0.00453389	0.00236303	0.00320796	0.000736529	0.00085047	6	58188	0.0103114	1	58188	0.00171857	1	58188	0.00171857	0	58188	0	0	58188	0	1	58188	0.00171857	0	58188	0	2	58188	0.00343713	0	58188	0	1	58188	0.00171857	0	58188	0	0	58188	0	1	58188	0.00171857	1	58188	0.00171857
Desulfonatronum	0.0832556	0.00378085	0.00382743	0.00537052	0.00249599	0.00171857	0.00183723	6	58188	0.0103114	2	58188	0.00343713	3	58188	0.0051557	2	58188	0.00343713	3	58188	0.0051557	2	58188	0.00343713	5	58188	0.00859284	2	58188	0.00343713	1	58188	0.00171857	1	58188	0.00171857	3	58188	0.0051557	0	58188	0	2	58188	0.00343713	0	58188	0
Desulfotomaculum	0.936939	0.00378085	0.00514423	0.00365196	0.0027761	0.00441917	0.00409346	1	58188	0.00171857	2	58188	0.00343713	4	58188	0.00687427	5	58188	0.00859284	1	58188	0.00171857	1	58188	0.00171857	3	58188	0.0051557	0	58188	0	0	58188	0	0	58188	0	3	58188	0.0051557	0	58188	0	6	58188	0.0103114	4	58188	0.00687427
Dialister	0.846072	0.00378085	0.00514423	0.00365196	0.00424781	0.0024551	0.00341955	7	58188	0.01203	0	58188	0	5	58188	0.00859284	0	58188	0	1	58188	0.00171857	0	58188	0	3	58188	0.0051557	1	58188	0.00171857	1	58188	0.00171857	2	58188	0.00343713	0	58188	0	0	58188	0	0	58188	0	1	58188	0.00171857
Gelria	0.598968	0.00378085	0.0035052	0.00429642	0.00613651	0.00171857	0.00304669	0	58188	0	2	58188	0.00343713	0	58188	0	0	58188	0	1	58188	0.00171857	5	58188	0.00859284	11	58188	0.0189042	1	58188	0.00171857	0	58188	0	0	58188	0	0	58188	0	2	58188	0.00343713	0	58188	0	5	58188	0.00859284
Ilumatobacter	0.161692	0.00378085	0.00366986	0.000859284	0.00121521	0.00270061	0.00240549	0	58188	0	2	58188	0.00343713	0	58188	0	0	58188	0	0	58188	0	1	58188	0.00171857	1	58188	0.00171857	0	58188	0	4	58188	0.00687427	0	58188	0	1	58188	0.00171857	3	58188	0.0051557	1	58188	0.00171857	0	58188	0
Lishizhenia	0.329937	0.00378085	0.00366986	0.00622981	0.00284181	0.00638325	0.0023803	3	58188	0.0051557	3	58188	0.0051557	6	58188	0.0103114	6	58188	0.0103114	4	58188	0.00687427	2	58188	0.00343713	1	58188	0.00171857	4	58188	0.00687427	3	58188	0.0051557	2	58188	0.00343713	4	58188	0.00687427	6	58188	0.0103114	4	58188	0.00687427	2	58188	0.00343713
Nonlabens	0.631595	0.00378085	0.00412456	0.0040816	0.00543034	0.00810182	0.012451	2	58188	0.00343713	0	58188	0	1	58188	0.00171857	2	58188	0.00343713	10	58188	0.0171857	4	58188	0.00687427	0	58188	0	0	58188	0	1	58188	0.00171857	11	58188	0.0189042	20	58188	0.0343713	0	58188	0	1	58188	0.00171857	0	58188	0
Parapedobacter	0.509178	0.00378085	0.00252577	0.0131041	0.0239205	0.00441917	0.00288409	1	58188	0.00171857	44	58188	0.075617	0	58188	0	1	58188	0.00171857	6	58188	0.0103114	2	58188	0.00343713	1	58188	0.00171857	6	58188	0.0103114	2	58188	0.00343713	4	58188	0.00687427	2	58188	0.00343713	1	58188	0.00171857	6	58188	0.0103114	1	58188	0.00171857
Pseudoclostridium	0.475419	0.00378085	0.0035052	0.00644463	0.00400743	0.00564672	0.00271174	6	58188	0.0103114	2	58188	0.00343713	0	58188	0	3	58188	0.0051557	5	58188	0.00859284	8	58188	0.0137485	3	58188	0.0051557	3	58188	0.0051557	5	58188	0.00859284	5	58188	0.00859284	2	58188	0.00343713	5	58188	0.00859284	3	58188	0.0051557	2	58188	0.00343713
Acidaminococcus	0.451788	0.00343713	0.00307427	0.00429642	0.00354292	0.00196408	0.0029665	6	58188	0.0103114	3	58188	0.0051557	0	58188	0	3	58188	0.0051557	0	58188	0	1	58188	0.00171857	2	58188	0.00343713	5	58188	0.00859284	1	58188	0.00171857	0	58188	0	5	58188	0.00859284	0	58188	0	0	58188	0	2	58188	0.00343713
Anaeromonas	0.597039	0.00343713	0.00243042	0.00193339	0.00200372	0.00294612	0.00300687	0	58188	0	3	58188	0.0051557	0	58188	0	0	58188	0	1	58188	0.00171857	1	58188	0.00171857	1	58188	0.00171857	3	58188	0.0051557	0	58188	0	4	58188	0.00687427	0	58188	0	0	58188	0	4	58188	0.00687427	3	58188	0.0051557
Chlorophyta	0.484886	0.00343713	0.0036049	0.00171857	0.00271729	0.00147306	0.00170094	0	58188	0	0	58188	0	1	58188	0.00171857	0	58188	0	5	58188	0.00859284	1	58188	0.00171857	0	58188	0	1	58188	0.00171857	3	58188	0.0051557	1	58188	0.00171857	0	58188	0	1	58188	0.00171857	1	58188	0.00171857	0	58188	0
Citrobacter	0.916995	0.00343713	0.0018826	0.0040816	0.0035364	0.00343713	0.00331211	3	58188	0.0051557	0	58188	0	6	58188	0.0103114	0	58188	0	3	58188	0.0051557	0	58188	0	4	58188	0.00687427	3	58188	0.0051557	2	58188	0.00343713	0	58188	0	6	58188	0.0103114	3	58188	0.0051557	0	58188	0	1	58188	0.00171857
Isosphaera	0.333928	0.00343713	0.00243042	0.0131041	0.0151277	0.00859284	0.00595329	10	58188	0.0171857	29	58188	0.0498385	5	58188	0.00859284	1	58188	0.00171857	0	58188	0	10	58188	0.0171857	3	58188	0.0051557	3	58188	0.0051557	6	58188	0.0103114	7	58188	0.01203	0	58188	0	11	58188	0.0189042	4	58188	0.00687427	1	58188	0.00171857
Lebetimonas	0.971493	0.00343713	0.00376519	0.00365196	0.00303042	0.00392815	0.00314406	3	58188	0.0051557	0	58188	0	4	58188	0.00687427	0	58188	0	2	58188	0.00343713	4	58188	0.00687427	4	58188	0.00687427	0	58188	0	3	58188	0.0051557	4	58188	0.00687427	3	58188	0.0051557	5	58188	0.00859284	1	58188	0.00171857	0	58188	0
Marinifilum	0.572674	0.00343713	0.00287571	0.00794837	0.00925228	0.00662876	0.00546776	3	58188	0.0051557	1	58188	0.00171857	1	58188	0.00171857	0	58188	0	10	58188	0.0171857	0	58188	0	6	58188	0.0103114	16	58188	0.0274971	2	58188	0.00343713	11	58188	0.0189042	4	58188	0.00687427	1	58188	0.00171857	4	58188	0.00687427	1	58188	0.00171857
Mesoplasma	0.392801	0.00343713	0.00434767	0.00580016	0.0056306	0.0228324	0.0420933	0	58188	0	3	58188	0.0051557	1	58188	0.00171857	6	58188	0.0103114	0	58188	0	7	58188	0.01203	9	58188	0.0154671	1	58188	0.00171857	0	58188	0	73	58188	0.125455	2	58188	0.00343713	7	58188	0.01203	4	58188	0.00687427	6	58188	0.0103114
Nunduva	0.516653	0.00343713	0.00307427	0.00150375	0.00218019	0.00196408	0.0029665	0	58188	0	0	58188	0	0	58188	0	1	58188	0.00171857	4	58188	0.00687427	0	58188	0	1	58188	0.00171857	1	58188	0.00171857	0	58188	0	0	58188	0	2	58188	0.00343713	0	58188	0	0	58188	0	1	58188	0.00171857
Oceanipulchritudo	0.978729	0.00343713	0.0036049	0.0040816	0.00708258	0.00368264	0.00336626	1	58188	0.00171857	0	58188	0	12	58188	0.0206228	0	58188	0	0	58188	0	0	58188	0	0	58188	0	6	58188	0.0103114	1	58188	0.00171857	5	58188	0.00859284	4	58188	0.00687427	0	58188	0	0	58188	0	1	58188	0.00171857
Rhodocaloribacter	0.696917	0.00343713	0.00448148	0.00257785	0.00429642	0.00147306	0.00170094	1	58188	0.00171857	1	58188	0.00171857	1	58188	0.00171857	0	58188	0	8	58188	0.0137485	1	58188	0.00171857	0	58188	0	0	58188	0	0	58188	0	1	58188	0.00171857	0	58188	0	0	58188	0	1	58188	0.00171857	3	58188	0.0051557
SR1_genera_incertae_sedis	0.197765	0.00343713	0.00243042	0.17336	0.228365	0.0834733	0.0517519	57	58188	0.0979583	155	58188	0.266378	45	58188	0.0773355	25	58188	0.0429642	28	58188	0.0481199	436	58188	0.749295	31	58188	0.0532756	30	58188	0.051557	16	58188	0.0274971	113	58188	0.194198	50	58188	0.0859284	30	58188	0.051557	52	58188	0.0893655	57	58188	0.0979583
Ulvibacterium	0.466871	0.00343713	0.00326075	0.00171857	0.00243042	0.00171857	0.00159108	0	58188	0	0	58188	0	0	58188	0	0	58188	0	0	58188	0	2	58188	0.00343713	4	58188	0.00687427	2	58188	0.00343713	0	58188	0	2	58188	0.00343713	0	58188	0	1	58188	0.00171857	2	58188	0.00343713	2	58188	0.00343713
WPS_2_genera_incertae_sedis	0.990065	0.00343713	0.00434767	0.00386678	0.00624091	0.00392815	0.00627852	0	58188	0	0	58188	0	0	58188	0	0	58188	0	11	58188	0.0189042	4	58188	0.00687427	3	58188	0.0051557	0	58188	0	0	58188	0	1	58188	0.00171857	2	58188	0.00343713	11	58188	0.0189042	2	58188	0.00343713	0	58188	0
Aminivibrio	0.67828	0.00309342	0.00274971	0.00494088	0.00388464	0.00392815	0.00327551	2	58188	0.00343713	7	58188	0.01203	4	58188	0.00687427	3	58188	0.0051557	0	58188	0	0	58188	0	5	58188	0.00859284	2	58188	0.00343713	4	58188	0.00687427	0	58188	0	1	58188	0.00171857	2	58188	0.00343713	0	58188	0	5	58188	0.00859284
Anaerosporomusa	0.848843	0.00309342	0.00168385	0.00257785	0.00227345	0.00343713	0.00355777	3	58188	0.0051557	1	58188	0.00171857	1	58188	0.00171857	0	58188	0	4	58188	0.00687427	1	58188	0.00171857	0	58188	0	2	58188	0.00343713	5	58188	0.00859284	0	58188	0	4	58188	0.00687427	0	58188	0	1	58188	0.00171857	0	58188	0
Armatimonadetes_gp4	0.836028	0.00309342	0.00274971	0.00257785	0.00171857	0.00220959	0.00255141	2	58188	0.00343713	3	58188	0.0051557	1	58188	0.00171857	2	58188	0.00343713	0	58188	0	2	58188	0.00343713	0	58188	0	2	58188	0.00343713	4	58188	0.00687427	0	58188	0	3	58188	0.0051557	0	58188	0	1	58188	0.00171857	0	58188	0
Brevibacterium	0.836216	0.00309342	0.00536898	0.00193339	0.00200372	0.00270061	0.00240549	3	58188	0.0051557	0	58188	0	1	58188	0.00171857	3	58188	0.0051557	0	58188	0	1	58188	0.00171857	0	58188	0	1	58188	0.00171857	0	58188	0	2	58188	0.00343713	1	58188	0.00171857	4	58188	0.00687427	3	58188	0.0051557	0	58188	0
Breznakibacter	0.256306	0.00309342	0.00274971	0.0444679	0.0753207	0.00441917	0.00476061	6	58188	0.0103114	138	58188	0.237162	0	58188	0	0	58188	0	33	58188	0.0567127	4	58188	0.00687427	3	58188	0.0051557	23	58188	0.0395271	3	58188	0.0051557	9	58188	0.0154671	1	58188	0.00171857	2	58188	0.00343713	1	58188	0.00171857	2	58188	0.00343713
Gallalistipes	0.959442	0.00309342	0.00382743	0.00257785	0.00227345	0.00270061	0.00288409	4	58188	0.00687427	1	58188	0.00171857	1	58188	0.00171857	0	58188	0	3	58188	0.0051557	1	58188	0.00171857	0	58188	0	2	58188	0.00343713	1	58188	0.00171857	0	58188	0	1	58188	0.00171857	0	58188	0	5	58188	0.00859284	1	58188	0.00171857
Mesomycoplasma	0.522258	0.00309342	0.00274971	0.00601499	0.00768567	0.00834733	0.00849052	0	58188	0	1	58188	0.00171857	0	58188	0	0	58188	0	4	58188	0.00687427	14	58188	0.0240599	6	58188	0.0103114	3	58188	0.0051557	1	58188	0.00171857	7	58188	0.01203	2	58188	0.00343713	3	58188	0.0051557	16	58188	0.0274971	4	58188	0.00687427
Microcystis	0.675717	0.00309342	0.00252577	0.0051557	0.00921479	0.00196408	0.00415194	1	58188	0.00171857	3	58188	0.0051557	0	58188	0	1	58188	0.00171857	0	58188	0	17	58188	0.0292156	1	58188	0.00171857	1	58188	0.00171857	7	58188	0.01203	0	58188	0	1	58188	0.00171857	0	58188	0	0	58188	0	0	58188	0
Murimonas	0.906229	0.00309342	0.00333243	0.0040816	0.00515122	0.00392815	0.00120275	2	58188	0.00343713	1	58188	0.00171857	2	58188	0.00343713	2	58188	0.00343713	0	58188	0	0	58188	0	10	58188	0.0171857	2	58188	0.00343713	3	58188	0.0051557	2	58188	0.00343713	3	58188	0.0051557	1	58188	0.00171857	2	58188	0.00343713	2	58188	0.00343713
Peptacetobacter	0.893017	0.00309342	0.00252577	0.00257785	0.00210481	0.0024551	0.00202452	2	58188	0.00343713	0	58188	0	1	58188	0.00171857	1	58188	0.00171857	2	58188	0.00343713	2	58188	0.00343713	4	58188	0.00687427	0	58188	0	3	58188	0.0051557	1	58188	0.00171857	2	58188	0.00343713	0	58188	0	1	58188	0.00171857	0	58188	0
Peptococcus	0.602483	0.00309342	0.00315019	0.0051557	0.00384283	0.00491019	0.00310548	3	58188	0.0051557	6	58188	0.0103114	5	58188	0.00859284	1	58188	0.00171857	5	58188	0.00859284	0	58188	0	4	58188	0.00687427	0	58188	0	3	58188	0.0051557	4	58188	0.00687427	3	58188	0.0051557	0	58188	0	1	58188	0.00171857	6	58188	0.0103114
Tepidanaerobacter	0.0940316	0.00309342	0.00227994	0.000644463	0.00119607	0.00122755	0.0017704	0	58188	0	1	58188	0.00171857	0	58188	0	2	58188	0.00343713	0	58188	0	0	58188	0	0	58188	0	0	58188	0	1	58188	0.00171857	3	58188	0.0051557	0	58188	0	0	58188	0	0	58188	0	0	58188	0
Thermodesulfobium	0.779358	0.00309342	0.00315019	0.00429642	0.00284992	0.00343713	0.00290491	4	58188	0.00687427	0	58188	0	1	58188	0.00171857	4	58188	0.00687427	2	58188	0.00343713	5	58188	0.00859284	1	58188	0.00171857	3	58188	0.0051557	1	58188	0.00171857	2	58188	0.00343713	1	58188	0.00171857	0	58188	0	5	58188	0.00859284	1	58188	0.00171857
Acidaminobacter	0.0532774	0.00274971	0.00233118	0.000429642	0.000744162	0.0024551	0.00180412	0	58188	0	0	58188	0	0	58188	0	0	58188	0	1	58188	0.00171857	1	58188	0.00171857	0	58188	0	0	58188	0	3	58188	0.0051557	2	58188	0.00343713	0	58188	0	0	58188	0	2	58188	0.00343713	2	58188	0.00343713
Acinetobacter	0.242614	0.00274971	0.00206228	0.00644463	0.00618147	0.00859284	0.00566271	4	58188	0.00687427	0	58188	0	3	58188	0.0051557	3	58188	0.0051557	0	58188	0	1	58188	0.00171857	9	58188	0.0154671	10	58188	0.0171857	8	58188	0.0137485	6	58188	0.0103114	2	58188	0.00343713	1	58188	0.00171857	3	58188	0.0051557	4	58188	0.00687427
Alterococcus	0.551241	0.00274971	0.00318747	0.00451124	0.00556465	0.00638325	0.00586146	1	58188	0.00171857	3	58188	0.0051557	10	58188	0.0171857	0	58188	0	2	58188	0.00343713	0	58188	0	0	58188	0	5	58188	0.00859284	0	58188	0	7	58188	0.01203	2	58188	0.00343713	0	58188	0	10	58188	0.0171857	4	58188	0.00687427
Aureimonas	0.0877535	0.00274971	0.00318747	0.000429642	0.000744162	0.000491019	0.00077637	0	58188	0	1	58188	0.00171857	0	58188	0	0	58188	0	1	58188	0.00171857	0	58188	0	0	58188	0	0	58188	0	0	58188	0	0	58188	0	0	58188	0	0	58188	0	1	58188	0.00171857	1	58188	0.00171857
Bacteriovorax	0.910704	0.00274971	0.00318747	0.00214821	0.00206049	0.00270061	0.00288409	3	58188	0.0051557	2	58188	0.00343713	1	58188	0.00171857	0	58188	0	0	58188	0	0	58188	0	3	58188	0.0051557	1	58188	0.00171857	4	58188	0.00687427	0	58188	0	1	58188	0.00171857	2	58188	0.00343713	4	58188	0.00687427	0	58188	0
Caldinitratiruptor	0.36527	0.00274971	0.00353875	0.00386678	0.00400743	0.00122755	0.00151342	5	58188	0.00859284	2	58188	0.00343713	0	58188	0	1	58188	0.00171857	2	58188	0.00343713	7	58188	0.01203	1	58188	0.00171857	0	58188	0	2	58188	0.00343713	0	58188	0	0	58188	0	0	58188	0	2	58188	0.00343713	1	58188	0.00171857
Desulfurispora	0.262694	0.00274971	0.00385817	0.00365196	0.00290604	0.000982039	0.00155274	3	58188	0.0051557	5	58188	0.00859284	0	58188	0	4	58188	0.00687427	2	58188	0.00343713	2	58188	0.00343713	1	58188	0.00171857	0	58188	0	0	58188	0	2	58188	0.00343713	0	58188	0	2	58188	0.00343713	0	58188	0	0	58188	0
Effusibacillus	0.837347	0.00274971	0.00299642	0.00429642	0.00556879	0.00343713	0.00318217	0	58188	0	2	58188	0.00343713	0	58188	0	0	58188	0	1	58188	0.00171857	5	58188	0.00859284	10	58188	0.0171857	2	58188	0.00343713	0	58188	0	6	58188	0.0103114	2	58188	0.00343713	0	58188	0	2	58188	0.00343713	2	58188	0.00343713
Gemmatimonas	0.111578	0.00274971	0.00336769	0.00150375	0.00159315	0	0	1	58188	0.00171857	0	58188	0	0	58188	0	0	58188	0	0	58188	0	2	58188	0.00343713	2	58188	0.00343713	2	58188	0.00343713	0	58188	0	0	58188	0	0	58188	0	0	58188	0	0	58188	0	0	58188	0
Geofilum	0.450126	0.00274971	0.0017526	0.00365196	0.0027761	0.00491019	0.00310548	0	58188	0	5	58188	0.00859284	1	58188	0.00171857	2	58188	0.00343713	0	58188	0	3	58188	0.0051557	3	58188	0.0051557	3	58188	0.0051557	2	58188	0.00343713	6	58188	0.0103114	0	58188	0	2	58188	0.00343713	2	58188	0.00343713	4	58188	0.00687427
Gp23	0.155396	0.00274971	0.00279234	0.00279267	0.00383682	0.00736529	0.00578903	0	58188	0	1	58188	0.00171857	3	58188	0.0051557	0	58188	0	1	58188	0.00171857	7	58188	0.01203	1	58188	0.00171857	0	58188	0	7	58188	0.01203	3	58188	0.0051557	9	58188	0.0154671	0	58188	0	2	58188	0.00343713	1	58188	0.00171857
Gp5	0.700248	0.00274971	0.00257212	0.00429642	0.00470649	0.00589223	0.00820898	5	58188	0.00859284	0	58188	0	8	58188	0.0137485	0	58188	0	4	58188	0.00687427	1	58188	0.00171857	2	58188	0.00343713	0	58188	0	3	58188	0.0051557	0	58188	0	13	58188	0.0223414	0	58188	0	0	58188	0	0	58188	0
Heliophilum	0.381264	0.00274971	0.00400835	0.00257785	0.00243042	0.000736529	0.00125186	2	58188	0.00343713	0	58188	0	4	58188	0.00687427	2	58188	0.00343713	3	58188	0.0051557	0	58188	0	1	58188	0.00171857	0	58188	0	1	58188	0.00171857	0	58188	0	2	58188	0.00343713	0	58188	0	0	58188	0	0	58188	0
Maledivibacter	0.611243	0.00274971	0.00137485	0.00494088	0.00466216	0.00491019	0.00404905	4	58188	0.00687427	2	58188	0.00343713	0	58188	0	0	58188	0	6	58188	0.0103114	2	58188	0.00343713	8	58188	0.0137485	1	58188	0.00171857	7	58188	0.01203	1	58188	0.00171857	4	58188	0.00687427	1	58188	0.00171857	0	58188	0	2	58188	0.00343713
Methanomicrobium	0.76985	0.00274971	0.00385817	0.0051557	0.00676601	0.0051557	0.00602375	1	58188	0.00171857	0	58188	0	0	58188	0	0	58188	0	0	58188	0	5	58188	0.00859284	11	58188	0.0189042	7	58188	0.01203	3	58188	0.0051557	1	58188	0.00171857	1	58188	0.00171857	0	58188	0	4	58188	0.00687427	1	58188	0.00171857
Niallia	0.986261	0.00274971	0.00257212	0.00279267	0.00242091	0.00294612	0.00077637	4	58188	0.00687427	2	58188	0.00343713	0	58188	0	2	58188	0.00343713	3	58188	0.0051557	0	58188	0	0	58188	0	2	58188	0.00343713	1	58188	0.00171857	2	58188	0.00343713	2	58188	0.00343713	2	58188	0.00343713	2	58188	0.00343713	2	58188	0.00343713
Nodularia	0.368217	0.00274971	0.00468763	0.00171857	0.00227345	0.00024551	0.000601373	0	58188	0	0	58188	0	0	58188	0	2	58188	0.00343713	1	58188	0.00171857	1	58188	0.00171857	4	58188	0.00687427	0	58188	0	0	58188	0	0	58188	0	0	58188	0	0	58188	0	1	58188	0.00171857	0	58188	0
Polynucleobacter	0.103869	0.00274971	0.00206228	0.00988176	0.0107582	0.00147306	0.00250372	14	58188	0.0240599	0	58188	0	1	58188	0.00171857	5	58188	0.00859284	16	58188	0.0274971	0	58188	0	0	58188	0	10	58188	0.0171857	0	58188	0	0	58188	0	2	58188	0.00343713	0	58188	0	4	58188	0.00687427	0	58188	0
Reichenbachiella	0.267598	0.00274971	0.00468763	0.000214821	0.000568363	0.000736529	0.00125186	0	58188	0	0	58188	0	0	58188	0	0	58188	0	0	58188	0	0	58188	0	1	58188	0.00171857	0	58188	0	0	58188	0	2	58188	0.00343713	0	58188	0	0	58188	0	0	58188	0	1	58188	0.00171857
Silvanigrella	0.722576	0.00274971	0.00233118	0.00494088	0.00504258	0.00392815	0.00465822	8	58188	0.0137485	0	58188	0	0	58188	0	3	58188	0.0051557	3	58188	0.0051557	2	58188	0.00343713	7	58188	0.01203	0	58188	0	0	58188	0	0	58188	0	8	58188	0.0137485	0	58188	0	2	58188	0.00343713	2	58188	0.00343713
Solitalea	0.110125	0.00274971	0.00233118	0.000644463	0.000831998	0.0024551	0.00202452	0	58188	0	0	58188	0	1	58188	0.00171857	0	58188	0	1	58188	0.00171857	0	58188	0	1	58188	0.00171857	0	58188	0	0	58188	0	3	58188	0.0051557	3	58188	0.0051557	2	58188	0.00343713	0	58188	0	1	58188	0.00171857
Spongitalea	0.294709	0.00274971	0.00257212	0.000429642	0.00113673	0.00220959	0.00352373	0	58188	0	0	58188	0	0	58188	0	0	58188	0	0	58188	0	2	58188	0.00343713	0	58188	0	0	58188	0	0	58188	0	0	58188	0	2	58188	0.00343713	0	58188	0	1	58188	0.00171857	0	58188	0
Sulfurihydrogenibium	0.745404	0.00274971	0.00233118	0.00343713	0.00343713	0.00220959	0.0023803	1	58188	0.00171857	7	58188	0.01203	0	58188	0	2	58188	0.00343713	2	58188	0.00343713	2	58188	0.00343713	1	58188	0.00171857	1	58188	0.00171857	0	58188	0	1	58188	0.00171857	0	58188	0	4	58188	0.00687427	2	58188	0.00343713	2	58188	0.00343713
Thalassospira	0.0788001	0.00274971	0.00257212	0.000429642	0.00113673	0.00392815	0.0036415	0	58188	0	0	58188	0	0	58188	0	0	58188	0	2	58188	0.00343713	0	58188	0	0	58188	0	0	58188	0	5	58188	0.00859284	1	58188	0.00171857	0	58188	0	2	58188	0.00343713	6	58188	0.0103114	1	58188	0.00171857
Thermoflavimicrobium	0.354084	0.00274971	0.00336769	0.00708909	0.00585559	0.00687427	0.00519646	9	58188	0.0154671	1	58188	0.00171857	6	58188	0.0103114	0	58188	0	5	58188	0.00859284	9	58188	0.0154671	2	58188	0.00343713	1	58188	0.00171857	2	58188	0.00343713	6	58188	0.0103114	2	58188	0.00343713	7	58188	0.01203	9	58188	0.0154671	1	58188	0.00171857
Xiamenia	0.234513	0.00274971	0.0017526	0.000429642	0.00113673	0.00196408	0.00323849	0	58188	0	0	58188	0	0	58188	0	0	58188	0	0	58188	0	0	58188	0	2	58188	0.00343713	0	58188	0	5	58188	0.00859284	0	58188	0	0	58188	0	0	58188	0	0	58188	0	0	58188	0
Anaeromassilibacillus	0.448947	0.00240599	0.0017526	0.0242748	0.043726	0.01203	0.00609339	9	58188	0.0154671	0	58188	0	8	58188	0.0137485	4	58188	0.00687427	4	58188	0.00687427	6	58188	0.0103114	81	58188	0.139204	1	58188	0.00171857	9	58188	0.0154671	12	58188	0.0206228	5	58188	0.00859284	0	58188	0	6	58188	0.0103114	8	58188	0.0137485
Botryobacter	0.273614	0.00240599	0.00299642	0.00236303	0.00383682	0.00736529	0.00865226	0	58188	0	0	58188	0	0	58188	0	1	58188	0.00171857	1	58188	0.00171857	0	58188	0	7	58188	0.01203	2	58188	0.00343713	10	58188	0.0171857	6	58188	0.0103114	0	58188	0	0	58188	0	13	58188	0.0223414	1	58188	0.00171857
Desulfobotulus	0.888989	0.00240599	0.00233118	0.00193339	0.00249599	0.00171857	0.00183723	4	58188	0.00687427	3	58188	0.0051557	0	58188	0	1	58188	0.00171857	0	58188	0	0	58188	0	0	58188	0	1	58188	0.00171857	2	58188	0.00343713	0	58188	0	1	58188	0.00171857	3	58188	0.0051557	0	58188	0	1	58188	0.00171857
Duodenibacillus	0.142886	0.00240599	0.00257212	0.00257785	0.00309819	0.0191498	0.0261511	0	58188	0	0	58188	0	0	58188	0	0	58188	0	5	58188	0.00859284	3	58188	0.0051557	1	58188	0.00171857	3	58188	0.0051557	1	58188	0.00171857	0	58188	0	1	58188	0.00171857	38	58188	0.0653056	32	58188	0.0549942	2	58188	0.00343713
Halobacteriovorax	0.930518	0.00240599	0.0017526	0.00300749	0.00306826	0.00319163	0.00435044	0	58188	0	0	58188	0	4	58188	0.00687427	0	58188	0	3	58188	0.0051557	4	58188	0.00687427	3	58188	0.0051557	0	58188	0	2	58188	0.00343713	7	58188	0.01203	0	58188	0	4	58188	0.00687427	0	58188	0	0	58188	0
Maribellus	0.959497	0.00240599	0.00299642	0.00193339	0.00200372	0.00196408	0.00348935	0	58188	0	1	58188	0.00171857	0	58188	0	0	58188	0	3	58188	0.0051557	1	58188	0.00171857	1	58188	0.00171857	3	58188	0.0051557	6	58188	0.0103114	1	58188	0.00171857	0	58188	0	0	58188	0	0	58188	0	1	58188	0.00171857
Moraxella	0.576232	0.00240599	0.00299642	0.00451124	0.00763446	0.00662876	0.00625929	2	58188	0.00343713	2	58188	0.00343713	0	58188	0	3	58188	0.0051557	14	58188	0.0240599	0	58188	0	0	58188	0	0	58188	0	1	58188	0.00171857	1	58188	0.00171857	4	58188	0.00687427	5	58188	0.00859284	12	58188	0.0206228	3	58188	0.0051557
Nitrospina	0.562463	0.00240599	0.00206228	0.00386678	0.00391422	0.00220959	0.00199453	1	58188	0.00171857	7	58188	0.01203	1	58188	0.00171857	1	58188	0.00171857	5	58188	0.00859284	2	58188	0.00343713	0	58188	0	1	58188	0.00171857	0	58188	0	2	58188	0.00343713	0	58188	0	0	58188	0	2	58188	0.00343713	2	58188	0.00343713
Polaribacter	0.458124	0.00240599	0.00206228	0.00494088	0.004501	0.00343713	0.00225013	0	58188	0	1	58188	0.00171857	0	58188	0	1	58188	0.00171857	3	58188	0.0051557	6	58188	0.0103114	5	58188	0.00859284	7	58188	0.01203	2	58188	0.00343713	4	58188	0.00687427	3	58188	0.0051557	1	58188	0.00171857	1	58188	0.00171857	3	58188	0.0051557
Rhizobium	0.148662	0.00240599	0.00137485	0.0156819	0.0093515	0.0247965	0.027015	9	58188	0.0154671	17	58188	0.0292156	16	58188	0.0274971	8	58188	0.0137485	12	58188	0.0206228	1	58188	0.00171857	8	58188	0.0137485	2	58188	0.00343713	10	58188	0.0171857	13	58188	0.0223414	8	58188	0.0137485	52	58188	0.0893655	5	58188	0.00859284	2	58188	0.00343713
Robertkochia	0.719923	0.00240599	0.00206228	0.00150375	0.00159315	0.0024551	0.00302685	1	58188	0.00171857	0	58188	0	1	58188	0.00171857	1	58188	0.00171857	1	58188	0.00171857	0	58188	0	0	58188	0	3	58188	0.0051557	1	58188	0.00171857	0	58188	0	1	58188	0.00171857	0	58188	0	5	58188	0.00859284	0	58188	0
Streptomyces	0.668387	0.00240599	0.00336769	0.00236303	0.00209382	0.00368264	0.00310548	4	58188	0.00687427	1	58188	0.00171857	1	58188	0.00171857	2	58188	0.00343713	0	58188	0	1	58188	0.00171857	2	58188	0.00343713	0	58188	0	3	58188	0.0051557	0	58188	0	2	58188	0.00343713	2	58188	0.00343713	6	58188	0.0103114	1	58188	0.00171857
Tepidibaculum	0.0191867	0.00240599	0.00206228	0.0105262	0.00598036	0.00466468	0.0036415	3	58188	0.0051557	10	58188	0.0171857	3	58188	0.0051557	7	58188	0.01203	7	58188	0.01203	6	58188	0.0103114	12	58188	0.0206228	1	58188	0.00171857	4	58188	0.00687427	1	58188	0.00171857	2	58188	0.00343713	0	58188	0	5	58188	0.00859284	1	58188	0.00171857
Thiohalobacter	0.612233	0.00240599	0.00137485	0.00128893	0.00187277	0.00220959	0.00255141	0	58188	0	0	58188	0	2	58188	0.00343713	0	58188	0	3	58188	0.0051557	1	58188	0.00171857	0	58188	0	0	58188	0	0	58188	0	1	58188	0.00171857	0	58188	0	3	58188	0.0051557	0	58188	0	1	58188	0.00171857
Zhenhengia	0.131825	0.00240599	0.00206228	0.0040816	0.00485609	0.011539	0.0115363	0	58188	0	0	58188	0	2	58188	0.00343713	1	58188	0.00171857	2	58188	0.00343713	0	58188	0	8	58188	0.0137485	6	58188	0.0103114	7	58188	0.01203	2	58188	0.00343713	6	58188	0.0103114	0	58188	0	3	58188	0.0051557	7	58188	0.01203
Aerofilum	0.0450102	0.00206228	0.00128606	0.000859284	0.000859284	0.00319163	0.0021403	1	58188	0.00171857	0	58188	0	0	58188	0	0	58188	0	1	58188	0.00171857	1	58188	0.00171857	1	58188	0.00171857	0	58188	0	0	58188	0	1	58188	0.00171857	1	58188	0.00171857	2	58188	0.00343713	4	58188	0.00687427	3	58188	0.0051557
Allobaculum	0.478436	0.00206228	0.00200418	0.00451124	0.00619266	0.00687427	0.00779469	10	58188	0.0171857	7	58188	0.01203	3	58188	0.0051557	1	58188	0.00171857	0	58188	0	0	58188	0	0	58188	0	0	58188	0	3	58188	0.0051557	12	58188	0.0206228	1	58188	0.00171857	1	58188	0.00171857	1	58188	0.00171857	10	58188	0.0171857
Aminobacterium	0.467932	0.00206228	0.00168385	0.00171857	0.00227345	0.00343713	0.00318217	0	58188	0	4	58188	0.00687427	0	58188	0	0	58188	0	1	58188	0.00171857	1	58188	0.00171857	2	58188	0.00343713	0	58188	0	0	58188	0	1	58188	0.00171857	1	58188	0.00171857	5	58188	0.00859284	4	58188	0.00687427	3	58188	0.0051557
Anaerosacchariphilus	0.282215	0.00206228	0.00128606	0.00279267	0.00209382	0.00441917	0.00316317	1	58188	0.00171857	2	58188	0.00343713	1	58188	0.00171857	1	58188	0.00171857	1	58188	0.00171857	0	58188	0	4	58188	0.00687427	3	58188	0.0051557	3	58188	0.0051557	5	58188	0.00859284	3	58188	0.0051557	0	58188	0	1	58188	0.00171857	1	58188	0.00171857
Bacillus	0.193608	0.00206228	0.00252577	0.00537052	0.00388464	0.00294612	0.0021959	2	58188	0.00343713	0	58188	0	3	58188	0.0051557	4	58188	0.00687427	2	58188	0.00343713	1	58188	0.00171857	6	58188	0.0103114	7	58188	0.01203	1	58188	0.00171857	4	58188	0.00687427	1	58188	0.00171857	0	58188	0	2	58188	0.00343713	1	58188	0.00171857
Bibersteinia	0.178039	0.00206228	0.00333243	0.0171857	0.0169695	0.013994	0.0113785	6	58188	0.0103114	1	58188	0.00171857	9	58188	0.0154671	33	58188	0.0567127	17	58188	0.0292156	4	58188	0.00687427	2	58188	0.00343713	8	58188	0.0137485	2	58188	0.00343713	10	58188	0.0171857	1	58188	0.00171857	17	58188	0.0292156	11	58188	0.0189042	16	58188	0.0274971
Cloacibacillus	0.697726	0.00206228	0.00168385	0.0010741	0.00190937	0.00147306	0.00193314	0	58188	0	0	58188	0	2	58188	0.00343713	0	58188	0	0	58188	0	3	58188	0.0051557	0	58188	0	0	58188	0	1	58188	0.00171857	0	58188	0	2	58188	0.00343713	0	58188	0	0	58188	0	0	58188	0
Cronobacter	0.673999	0.00206228	0.00128606	0.00837802	0.0183581	0.00392815	0.00621096	3	58188	0.0051557	0	58188	0	0	58188	0	0	58188	0	0	58188	0	1	58188	0.00171857	33	58188	0.0567127	2	58188	0.00343713	1	58188	0.00171857	11	58188	0.0189042	2	58188	0.00343713	0	58188	0	0	58188	0	1	58188	0.00171857
Denitrobacterium	0.00227185	0.00206228	0.00128606	0.000429642	0.000744162	0	0	1	58188	0.00171857	0	58188	0	0	58188	0	0	58188	0	0	58188	0	1	58188	0.00171857	0	58188	0	0	58188	0	0	58188	0	0	58188	0	0	58188	0	0	58188	0	0	58188	0	0	58188	0
Desulfoluna	0.560382	0.00206228	0.00333243	0.0040816	0.00437623	0.00196408	0.00348935	2	58188	0.00343713	0	58188	0	8	58188	0.0137485	2	58188	0.00343713	4	58188	0.00687427	3	58188	0.0051557	0	58188	0	0	58188	0	0	58188	0	0	58188	0	0	58188	0	6	58188	0.0103114	1	58188	0.00171857	1	58188	0.00171857
Draconibacterium	0.711387	0.00206228	0.00252577	0.00171857	0.00210481	0.00294612	0.00327551	1	58188	0.00171857	0	58188	0	0	58188	0	1	58188	0.00171857	0	58188	0	0	58188	0	3	58188	0.0051557	3	58188	0.0051557	0	58188	0	5	58188	0.00859284	2	58188	0.00343713	0	58188	0	1	58188	0.00171857	0	58188	0
Duganella	0.208631	0.00206228	0.00252577	0.00859284	0.00968364	0.00294612	0.00352373	14	58188	0.0240599	0	58188	0	4	58188	0.00687427	0	58188	0	11	58188	0.0189042	0	58188	0	0	58188	0	11	58188	0.0189042	0	58188	0	0	58188	0	0	58188	0	1	58188	0.00171857	6	58188	0.0103114	3	58188	0.0051557
Fusobacterium	0.0833748	0.00206228	0.00200418	0.00622981	0.00493153	0.00859284	0.00468403	8	58188	0.0137485	0	58188	0	1	58188	0.00171857	6	58188	0.0103114	7	58188	0.01203	2	58188	0.00343713	4	58188	0.00687427	1	58188	0.00171857	0	58188	0	6	58188	0.0103114	9	58188	0.0154671	3	58188	0.0051557	4	58188	0.00687427	6	58188	0.0103114
Gemella	0.281509	0.00206228	0.00274971	0.00300749	0.00268311	0.00638325	0.00673252	1	58188	0.00171857	4	58188	0.00687427	0	58188	0	1	58188	0.00171857	4	58188	0.00687427	3	58188	0.0051557	0	58188	0	1	58188	0.00171857	4	58188	0.00687427	0	58188	0	12	58188	0.0206228	0	58188	0	2	58188	0.00343713	6	58188	0.0103114
Gp16	0.135254	0.00206228	0.00200418	0.00279267	0.00147274	0.000736529	0.00180412	2	58188	0.00343713	1	58188	0.00171857	1	58188	0.00171857	2	58188	0.00343713	2	58188	0.00343713	0	58188	0	3	58188	0.0051557	2	58188	0.00343713	0	58188	0	0	58188	0	0	58188	0	0	58188	0	3	58188	0.0051557	0	58188	0
Gp6	0.0787231	0.00206228	0.00168385	0.00472606	0.00306826	0.00147306	0.00232911	2	58188	0.00343713	2	58188	0.00343713	2	58188	0.00343713	6	58188	0.0103114	3	58188	0.0051557	0	58188	0	5	58188	0.00859284	2	58188	0.00343713	1	58188	0.00171857	0	58188	0	4	58188	0.00687427	1	58188	0.00171857	0	58188	0	0	58188	0
Hallerella	0.171518	0.00206228	0.00333243	0.00322231	0.00337618	0.0110479	0.013212	1	58188	0.00171857	0	58188	0	3	58188	0.0051557	0	58188	0	6	58188	0.0103114	0	58188	0	3	58188	0.0051557	2	58188	0.00343713	0	58188	0	4	58188	0.00687427	0	58188	0	1	58188	0.00171857	6	58188	0.0103114	11	58188	0.0189042
Hungatella	0.201197	0.00206228	0.000687427	0.00429642	0.00210481	0.00466468	0.00314406	2	58188	0.00343713	1	58188	0.00171857	5	58188	0.00859284	3	58188	0.0051557	1	58188	0.00171857	3	58188	0.0051557	2	58188	0.00343713	3	58188	0.0051557	1	58188	0.00171857	6	58188	0.0103114	2	58188	0.00343713	4	58188	0.00687427	1	58188	0.00171857	1	58188	0.00171857
Mangrovibacterium	0.537356	0.00206228	0.00333243	0.00257785	0.00374553	0.000736529	0.00085047	0	58188	0	0	58188	0	2	58188	0.00343713	0	58188	0	1	58188	0.00171857	1	58188	0.00171857	1	58188	0.00171857	7	58188	0.01203	0	58188	0	1	58188	0.00171857	1	58188	0.00171857	0	58188	0	0	58188	0	0	58188	0
Pedomicrobium	0.171346	0.00206228	0.00168385	0.0010741	0.00226328	0.00343713	0.00225013	0	58188	0	0	58188	0	0	58188	0	0	58188	0	1	58188	0.00171857	0	58188	0	4	58188	0.00687427	0	58188	0	2	58188	0.00343713	4	58188	0.00687427	3	58188	0.0051557	1	58188	0.00171857	0	58188	0	3	58188	0.0051557
Peribacillus	0.28688	0.00206228	0.00200418	0.00322231	0.004501	0.00589223	0.00419527	8	58188	0.0137485	0	58188	0	1	58188	0.00171857	1	58188	0.00171857	0	58188	0	0	58188	0	1	58188	0.00171857	4	58188	0.00687427	9	58188	0.0154671	4	58188	0.00687427	3	58188	0.0051557	1	58188	0.00171857	3	58188	0.0051557	2	58188	0.00343713
Rikenella	0.430641	0.00206228	0.00333243	0.00386678	0.00318631	0.00662876	0.00828936	2	58188	0.00343713	1	58188	0.00171857	0	58188	0	0	58188	0	5	58188	0.00859284	3	58188	0.0051557	5	58188	0.00859284	2	58188	0.00343713	3	58188	0.0051557	2	58188	0.00343713	0	58188	0	0	58188	0	15	58188	0.0257785	2	58188	0.00343713
Scandinavium	0.131484	0.00206228	0.00200418	0.00429642	0.00543459	0	0	0	58188	0	0	58188	0	0	58188	0	3	58188	0.0051557	6	58188	0.0103114	2	58188	0.00343713	0	58188	0	9	58188	0.0154671	0	58188	0	0	58188	0	0	58188	0	0	58188	0	0	58188	0	0	58188	0
Sphingobium	0.313211	0.00206228	0.00200418	0.00580016	0.0067626	0.00662876	0.00310548	9	58188	0.0154671	3	58188	0.0051557	10	58188	0.0171857	5	58188	0.00859284	0	58188	0	0	58188	0	0	58188	0	0	58188	0	3	58188	0.0051557	4	58188	0.00687427	3	58188	0.0051557	7	58188	0.01203	2	58188	0.00343713	2	58188	0.00343713
Spongiimonas	0.526745	0.00206228	0.00200418	0.00365196	0.00290604	0.00392815	0.00286311	0	58188	0	2	58188	0.00343713	0	58188	0	1	58188	0.00171857	4	58188	0.00687427	3	58188	0.0051557	5	58188	0.00859284	2	58188	0.00343713	3	58188	0.0051557	2	58188	0.00343713	1	58188	0.00171857	4	58188	0.00687427	5	58188	0.00859284	0	58188	0
Ureibacillus	0.587956	0.00206228	0.00333243	0.00193339	0.00234342	0.000736529	0.00125186	0	58188	0	1	58188	0.00171857	2	58188	0.00343713	0	58188	0	2	58188	0.00343713	4	58188	0.00687427	0	58188	0	0	58188	0	2	58188	0.00343713	0	58188	0	0	58188	0	0	58188	0	1	58188	0.00171857	0	58188	0
Winogradskyella	0.678248	0.00206228	0.00128606	0.00386678	0.00268311	0.00368264	0.0049833	2	58188	0.00343713	1	58188	0.00171857	0	58188	0	4	58188	0.00687427	1	58188	0.00171857	5	58188	0.00859284	3	58188	0.0051557	2	58188	0.00343713	0	58188	0	1	58188	0.00171857	2	58188	0.00343713	0	58188	0	1	58188	0.00171857	9	58188	0.0154671
Anaerobium	0.774103	0.00171857	0.00217383	0.00279267	0.00209382	0.0024551	0.00288409	1	58188	0.00171857	3	58188	0.0051557	3	58188	0.0051557	2	58188	0.00343713	1	58188	0.00171857	0	58188	0	3	58188	0.0051557	0	58188	0	2	58188	0.00343713	2	58188	0.00343713	5	58188	0.00859284	1	58188	0.00171857	0	58188	0	0	58188	0
Bosea	0.184666	0.00171857	0.00217383	0.00429642	0.00478429	0.000736529	0.00180412	0	58188	0	1	58188	0.00171857	0	58188	0	3	58188	0.0051557	9	58188	0.0154671	4	58188	0.00687427	1	58188	0.00171857	2	58188	0.00343713	3	58188	0.0051557	0	58188	0	0	58188	0	0	58188	0	0	58188	0	0	58188	0
Chlorarachniophyceae	0.929593	0.00171857	0.00108692	0.00128893	0.00239214	0.00147306	0.00143155	0	58188	0	0	58188	0	0	58188	0	0	58188	0	0	58188	0	0	58188	0	4	58188	0.00687427	2	58188	0.00343713	2	58188	0.00343713	0	58188	0	1	58188	0.00171857	1	58188	0.00171857	2	58188	0.00343713	0	58188	0
Desulfallas	0.589734	0.00171857	0.0018826	0.00193339	0.00290604	0.000736529	0.00085047	0	58188	0	0	58188	0	0	58188	0	4	58188	0.00687427	1	58188	0.00171857	0	58188	0	4	58188	0.00687427	0	58188	0	0	58188	0	1	58188	0.00171857	0	58188	0	0	58188	0	1	58188	0.00171857	0	58188	0
Desulforamulus	0.651135	0.00171857	0.00108692	0.00300749	0.00341018	0.00196408	0.00193314	0	58188	0	0	58188	0	3	58188	0.0051557	1	58188	0.00171857	3	58188	0.0051557	1	58188	0.00171857	6	58188	0.0103114	0	58188	0	2	58188	0.00343713	0	58188	0	1	58188	0.00171857	0	58188	0	3	58188	0.0051557	0	58188	0
Elizabethkingia	0.345261	0.00171857	0.00217383	0.00257785	0.00343713	0.000491019	0.00077637	0	58188	0	3	58188	0.0051557	0	58188	0	0	58188	0	1	58188	0.00171857	6	58188	0.0103114	0	58188	0	2	58188	0.00343713	0	58188	0	1	58188	0.00171857	0	58188	0	0	58188	0	1	58188	0.00171857	0	58188	0
Filifactor	0.695065	0.00171857	0.00266239	0.00386678	0.00520913	0.00343713	0.00355777	1	58188	0.00171857	0	58188	0	4	58188	0.00687427	0	58188	0	4	58188	0.00687427	0	58188	0	9	58188	0.0154671	0	58188	0	6	58188	0.0103114	3	58188	0.0051557	3	58188	0.0051557	0	58188	0	0	58188	0	2	58188	0.00343713
Ileibacterium	0.11704	0.00171857	0.00153713	0.00730391	0.0137149	0.0743894	0.103362	3	58188	0.0051557	25	58188	0.0429642	4	58188	0.00687427	0	58188	0	0	58188	0	0	58188	0	2	58188	0.00343713	0	58188	0	42	58188	0.0721798	187	58188	0.321372	3	58188	0.0051557	31	58188	0.0532756	2	58188	0.00343713	21	58188	0.0360899
Ketobacter	0.496226	0.00171857	0.00153713	0.00386678	0.00409852	0.00319163	0.00170094	4	58188	0.00687427	0	58188	0	0	58188	0	1	58188	0.00171857	7	58188	0.01203	2	58188	0.00343713	0	58188	0	4	58188	0.00687427	1	58188	0.00171857	2	58188	0.00343713	1	58188	0.00171857	1	58188	0.00171857	4	58188	0.00687427	2	58188	0.00343713
Leptospira	0.835761	0.00171857	0.00266239	0.00193339	0.00234342	0.00122755	0.00120275	0	58188	0	1	58188	0.00171857	4	58188	0.00687427	0	58188	0	0	58188	0	2	58188	0.00343713	0	58188	0	2	58188	0.00343713	0	58188	0	1	58188	0.00171857	1	58188	0.00171857	2	58188	0.00343713	0	58188	0	0	58188	0
Luteimonas	0.137518	0.00171857	0.0018826	0.00601499	0.00569984	0.00196408	0.00232911	1	58188	0.00171857	11	58188	0.0189042	3	58188	0.0051557	0	58188	0	5	58188	0.00859284	2	58188	0.00343713	5	58188	0.00859284	1	58188	0.00171857	1	58188	0.00171857	1	58188	0.00171857	4	58188	0.00687427	0	58188	0	0	58188	0	2	58188	0.00343713
Mahella	0.128751	0.00171857	0.00153713	0.000859284	0.000859284	0.00270061	0.00202452	1	58188	0.00171857	1	58188	0.00171857	0	58188	0	1	58188	0.00171857	1	58188	0.00171857	0	58188	0	0	58188	0	0	58188	0	2	58188	0.00343713	0	58188	0	0	58188	0	3	58188	0.0051557	1	58188	0.00171857	2	58188	0.00343713
Marinitoga	0.944015	0.00171857	0.00108692	0.00214821	0.00187277	0.00196408	0.00266692	2	58188	0.00343713	2	58188	0.00343713	0	58188	0	1	58188	0.00171857	2	58188	0.00343713	0	58188	0	3	58188	0.0051557	0	58188	0	0	58188	0	0	58188	0	0	58188	0	0	58188	0	1	58188	0.00171857	3	58188	0.0051557
Meniscus	0.180827	0.00171857	0.00108692	0.00773355	0.00824196	0.00294612	0.00327551	1	58188	0.00171857	0	58188	0	0	58188	0	2	58188	0.00343713	4	58188	0.00687427	6	58188	0.0103114	8	58188	0.0137485	15	58188	0.0257785	0	58188	0	1	58188	0.00171857	5	58188	0.00859284	0	58188	0	4	58188	0.00687427	0	58188	0
Microgenomates_genera_incertae_sedis	0.0629934	0.00171857	0.00266239	0.00236303	0.00402467	0.0105569	0.00986936	0	58188	0	0	58188	0	0	58188	0	0	58188	0	1	58188	0.00171857	3	58188	0.0051557	7	58188	0.01203	0	58188	0	3	58188	0.0051557	7	58188	0.01203	0	58188	0	2	58188	0.00343713	3	58188	0.0051557	18	58188	0.0309342
Negativicoccus	0.0966155	0.00171857	0.00153713	0.0010741	0.00147274	0	0	2	58188	0.00343713	2	58188	0.00343713	0	58188	0	1	58188	0.00171857	0	58188	0	0	58188	0	0	58188	0	0	58188	0	0	58188	0	0	58188	0	0	58188	0	0	58188	0	0	58188	0	0	58188	0
Phocea	0.0549207	0.00171857	0.0018826	0.00644463	0.0025418	0.00662876	0.00454027	6	58188	0.0103114	5	58188	0.00859284	3	58188	0.0051557	3	58188	0.0051557	3	58188	0.0051557	1	58188	0.00171857	4	58188	0.00687427	5	58188	0.00859284	5	58188	0.00859284	9	58188	0.0154671	3	58188	0.0051557	0	58188	0	2	58188	0.00343713	5	58188	0.00859284
Temperatibacter	0.162243	0.00171857	0.00153713	0.00494088	0.00585559	0.00883835	0.00708158	11	58188	0.0189042	2	58188	0.00343713	5	58188	0.00859284	1	58188	0.00171857	2	58188	0.00343713	0	58188	0	2	58188	0.00343713	0	58188	0	2	58188	0.00343713	9	58188	0.0154671	13	58188	0.0223414	0	58188	0	4	58188	0.00687427	5	58188	0.00859284
Thermodesulfovibrio	0.683798	0.00171857	0.00217383	0.00343713	0.00446497	0.00343713	0.00290491	2	58188	0.00343713	4	58188	0.00687427	0	58188	0	0	58188	0	1	58188	0.00171857	1	58188	0.00171857	8	58188	0.0137485	0	58188	0	5	58188	0.00859284	3	58188	0.0051557	2	58188	0.00343713	0	58188	0	3	58188	0.0051557	1	58188	0.00171857
Caproicibacterium	0.0838354	0.00137485	0.000687427	0.00451124	0.00373937	0.00147306	0.00170094	3	58188	0.0051557	1	58188	0.00171857	1	58188	0.00171857	2	58188	0.00343713	2	58188	0.00343713	7	58188	0.01203	5	58188	0.00859284	0	58188	0	0	58188	0	1	58188	0.00171857	3	58188	0.0051557	0	58188	0	0	58188	0	1	58188	0.00171857
Fodinibius	0.452394	0.00137485	0.00128606	0.00300749	0.00206049	0.00270061	0.00257493	2	58188	0.00343713	1	58188	0.00171857	1	58188	0.00171857	2	58188	0.00343713	4	58188	0.00687427	0	58188	0	3	58188	0.0051557	1	58188	0.00171857	1	58188	0.00171857	1	58188	0.00171857	1	58188	0.00171857	0	58188	0	2	58188	0.00343713	1	58188	0.00171857
Gp7	0.71745	0.00137485	0.00200418	0.00214821	0.00187277	0.00147306	0.00143155	3	58188	0.0051557	0	58188	0	1	58188	0.00171857	3	58188	0.0051557	1	58188	0.00171857	1	58188	0.00171857	0	58188	0	1	58188	0.00171857	2	58188	0.00343713	1	58188	0.00171857	0	58188	0	0	58188	0	0	58188	0	2	58188	0.00343713
Johnsonella	0.403306	0.00137485	0.00128606	0.00193339	0.00218019	0.00319163	0.00266692	0	58188	0	1	58188	0.00171857	0	58188	0	0	58188	0	1	58188	0.00171857	1	58188	0.00171857	4	58188	0.00687427	2	58188	0.00343713	1	58188	0.00171857	1	58188	0.00171857	5	58188	0.00859284	0	58188	0	3	58188	0.0051557	1	58188	0.00171857
Miltoncostaea	0.281778	0.00137485	0.00128606	0.00128893	0.001664	0.00024551	0.000601373	0	58188	0	1	58188	0.00171857	0	58188	0	1	58188	0.00171857	3	58188	0.0051557	0	58188	0	0	58188	0	1	58188	0.00171857	0	58188	0	0	58188	0	1	58188	0.00171857	0	58188	0	0	58188	0	0	58188	0
Mucinivorans	0.449137	0.00137485	0.00128606	0.00171857	0.00148832	0.000736529	0.00125186	2	58188	0.00343713	0	58188	0	0	58188	0	0	58188	0	2	58188	0.00343713	1	58188	0.00171857	2	58188	0.00343713	1	58188	0.00171857	0	58188	0	0	58188	0	0	58188	0	0	58188	0	1	58188	0.00171857	2	58188	0.00343713
Mycoplasmopsis	0.432495	0.00137485	0.00168385	0.00236303	0.00209382	0.00319163	0.00250372	1	58188	0.00171857	2	58188	0.00343713	0	58188	0	0	58188	0	2	58188	0.00343713	1	58188	0.00171857	4	58188	0.00687427	1	58188	0.00171857	0	58188	0	3	58188	0.0051557	4	58188	0.00687427	1	58188	0.00171857	2	58188	0.00343713	0	58188	0
Puteibacter	0.748537	0.00137485	0.00200418	0.00150375	0.00234342	0.000736529	0.00085047	1	58188	0.00171857	0	58188	0	0	58188	0	0	58188	0	0	58188	0	0	58188	0	4	58188	0.00687427	2	58188	0.00343713	0	58188	0	1	58188	0.00171857	1	58188	0.00171857	0	58188	0	0	58188	0	1	58188	0.00171857
Salibacter	0.259174	0.00137485	0.00274971	0.00622981	0.00763446	0.00220959	0.0023803	0	58188	0	0	58188	0	0	58188	0	1	58188	0.00171857	1	58188	0.00171857	6	58188	0.0103114	12	58188	0.0206228	9	58188	0.0154671	1	58188	0.00171857	2	58188	0.00343713	2	58188	0.00343713	0	58188	0	0	58188	0	0	58188	0
Thermolithobacter	0.982946	0.00137485	0.00128606	0.00128893	0.00187277	0.00147306	0.00193314	3	58188	0.0051557	2	58188	0.00343713	0	58188	0	1	58188	0.00171857	0	58188	0	0	58188	0	0	58188	0	0	58188	0	0	58188	0	0	58188	0	1	58188	0.00171857	0	58188	0	3	58188	0.0051557	0	58188	0
Acetanaerobacterium	0.121533	0.00103114	0.00206228	0.00558534	0.00372081	0.00662876	0.00561997	4	58188	0.00687427	2	58188	0.00343713	6	58188	0.0103114	6	58188	0.0103114	0	58188	0	2	58188	0.00343713	5	58188	0.00859284	1	58188	0.00171857	8	58188	0.0137485	1	58188	0.00171857	1	58188	0.00171857	9	58188	0.0154671	4	58188	0.00687427	0	58188	0
Allofustis	0.361945	0.00103114	0.00137485	0.020408	0.0386146	0.00368264	0.00584086	0	58188	0	1	58188	0.00171857	0	58188	0	0	58188	0	12	58188	0.0206228	11	58188	0.0189042	70	58188	0.1203	1	58188	0.00171857	0	58188	0	2	58188	0.00343713	3	58188	0.0051557	0	58188	0	10	58188	0.0171857	0	58188	0
Anaerococcus	0.458794	0.00103114	0.00206228	0.00128893	0.00142496	0.0024551	0.00240549	2	58188	0.00343713	1	58188	0.00171857	0	58188	0	0	58188	0	0	58188	0	2	58188	0.00343713	0	58188	0	1	58188	0.00171857	0	58188	0	4	58188	0.00687427	2	58188	0.00343713	0	58188	0	2	58188	0.00343713	2	58188	0.00343713
Botrimarina	0.247435	0.00103114	0.00137485	0.00472606	0.005349	0.00540121	0.00394347	6	58188	0.0103114	7	58188	0.01203	2	58188	0.00343713	0	58188	0	0	58188	0	0	58188	0	0	58188	0	7	58188	0.01203	5	58188	0.00859284	6	58188	0.0103114	2	58188	0.00343713	6	58188	0.0103114	2	58188	0.00343713	1	58188	0.00171857
Caldicellulosiruptor	0.327541	0.00103114	0.00137485	0.0040816	0.0044598	0.00392815	0.00314406	3	58188	0.0051557	2	58188	0.00343713	0	58188	0	0	58188	0	1	58188	0.00171857	6	58188	0.0103114	7	58188	0.01203	0	58188	0	2	58188	0.00343713	0	58188	0	6	58188	0.0103114	3	58188	0.0051557	1	58188	0.00171857	3	58188	0.0051557
Criibacterium	0.016456	0.00103114	0.00137485	0.00365196	0.003265	0.00613774	0.00202452	3	58188	0.0051557	1	58188	0.00171857	1	58188	0.00171857	1	58188	0.00171857	1	58188	0.00171857	4	58188	0.00687427	6	58188	0.0103114	0	58188	0	3	58188	0.0051557	3	58188	0.0051557	4	58188	0.00687427	3	58188	0.0051557	6	58188	0.0103114	2	58188	0.00343713
Cutibacterium	0.522612	0.00103114	0.00206228	0.000429642	0.000744162	0.00147306	0.00193314	0	58188	0	1	58188	0.00171857	0	58188	0	0	58188	0	0	58188	0	0	58188	0	1	58188	0.00171857	0	58188	0	1	58188	0.00171857	0	58188	0	0	58188	0	3	58188	0.0051557	2	58188	0.00343713	0	58188	0
Desulfovectis	0.207646	0.00103114	0.000841923	0.00236303	0.0035364	0	0	0	58188	0	0	58188	0	0	58188	0	0	58188	0	2	58188	0.00343713	3	58188	0.0051557	0	58188	0	6	58188	0.0103114	0	58188	0	0	58188	0	0	58188	0	0	58188	0	0	58188	0	0	58188	0
Enterococcus	0.834874	0.00103114	0.00137485	0.00171857	0.00271729	0.00122755	0.00120275	0	58188	0	1	58188	0.00171857	1	58188	0.00171857	1	58188	0.00171857	0	58188	0	5	58188	0.00859284	0	58188	0	0	58188	0	1	58188	0.00171857	2	58188	0.00343713	0	58188	0	1	58188	0.00171857	0	58188	0	1	58188	0.00171857
Flavonifractor	0.117628	0.00103114	0.000841923	0.0100966	0.00981381	0.00589223	0.00409346	2	58188	0.00343713	2	58188	0.00343713	3	58188	0.0051557	2	58188	0.00343713	4	58188	0.00687427	6	58188	0.0103114	20	58188	0.0343713	8	58188	0.0137485	1	58188	0.00171857	8	58188	0.0137485	3	58188	0.0051557	2	58188	0.00343713	6	58188	0.0103114	2	58188	0.00343713
Frankia	0.212778	0.00103114	0.00137485	0.00622981	0.00718607	0.00220959	0.00352373	0	58188	0	10	58188	0.0171857	0	58188	0	0	58188	0	2	58188	0.00343713	11	58188	0.0189042	2	58188	0.00343713	4	58188	0.00687427	6	58188	0.0103114	0	58188	0	0	58188	0	0	58188	0	1	58188	0.00171857	0	58188	0
Frederiksenia	0.283993	0.00103114	0.00206228	0.0040816	0.00402467	0.00466468	0.00407871	1	58188	0.00171857	0	58188	0	0	58188	0	5	58188	0.00859284	7	58188	0.01203	1	58188	0.00171857	3	58188	0.0051557	2	58188	0.00343713	5	58188	0.00859284	0	58188	0	0	58188	0	5	58188	0.00859284	4	58188	0.00687427	5	58188	0.00859284
Fumia	0.194214	0.00103114	0.00137485	0.00472606	0.00427488	0.00491019	0.00372334	2	58188	0.00343713	4	58188	0.00687427	3	58188	0.0051557	1	58188	0.00171857	4	58188	0.00687427	0	58188	0	0	58188	0	8	58188	0.0137485	2	58188	0.00343713	6	58188	0.0103114	2	58188	0.00343713	0	58188	0	3	58188	0.0051557	6	58188	0.0103114
Gp18	0.487065	0.00103114	0.00137485	0.00150375	0.00218019	0.00270061	0.00288409	0	58188	0	0	58188	0	1	58188	0.00171857	0	58188	0	1	58188	0.00171857	0	58188	0	4	58188	0.00687427	1	58188	0.00171857	1	58188	0.00171857	4	58188	0.00687427	0	58188	0	2	58188	0.00343713	0	58188	0	4	58188	0.00687427
Marinisporobacter	0.305133	0.00103114	0.00137485	0	0	0.000982039	0.00180412	0	58188	0	0	58188	0	0	58188	0	0	58188	0	0	58188	0	0	58188	0	0	58188	0	0	58188	0	1	58188	0.00171857	0	58188	0	3	58188	0.0051557	0	58188	0	0	58188	0	0	58188	0
Mycobacterium	0.0273372	0.00103114	0.00137485	0.00580016	0.00296888	0.0051557	0.00304669	3	58188	0.0051557	6	58188	0.0103114	1	58188	0.00171857	3	58188	0.0051557	3	58188	0.0051557	1	58188	0.00171857	5	58188	0.00859284	5	58188	0.00859284	5	58188	0.00859284	6	58188	0.0103114	3	58188	0.0051557	1	58188	0.00171857	3	58188	0.0051557	1	58188	0.00171857
Photorhabdus	0.0226536	0.00103114	0.00206228	0.00214821	0.00187277	0.00810182	0.00641152	1	58188	0.00171857	1	58188	0.00171857	3	58188	0.0051557	3	58188	0.0051557	0	58188	0	0	58188	0	1	58188	0.00171857	1	58188	0.00171857	7	58188	0.01203	3	58188	0.0051557	3	58188	0.0051557	8	58188	0.0137485	1	58188	0.00171857	11	58188	0.0189042
Pseudonocardia	0.810008	0.00103114	0.00206228	0.00128893	0.001664	0.00196408	0.00323849	0	58188	0	3	58188	0.0051557	0	58188	0	1	58188	0.00171857	0	58188	0	0	58188	0	1	58188	0.00171857	1	58188	0.00171857	3	58188	0.0051557	5	58188	0.00859284	0	58188	0	0	58188	0	0	58188	0	0	58188	0
Pseudopedobacter	0.0344248	0.00103114	0.00137485	0.00494088	0.00159315	0.00319163	0.00310548	3	58188	0.0051557	3	58188	0.0051557	4	58188	0.00687427	1	58188	0.00171857	4	58188	0.00687427	3	58188	0.0051557	2	58188	0.00343713	3	58188	0.0051557	1	58188	0.00171857	5	58188	0.00859284	1	58188	0.00171857	2	58188	0.00343713	0	58188	0	4	58188	0.00687427
Siphonobacter	0.136886	0.00103114	0.00137485	0.00322231	0.00234342	0.00417366	0.00288409	4	58188	0.00687427	4	58188	0.00687427	2	58188	0.00343713	1	58188	0.00171857	1	58188	0.00171857	2	58188	0.00343713	1	58188	0.00171857	0	58188	0	1	58188	0.00171857	4	58188	0.00687427	3	58188	0.0051557	3	58188	0.0051557	0	58188	0	5	58188	0.00859284
Sulfobacillus	0.140316	0.00103114	0.000841923	0.00665945	0.00741366	0.00196408	0.00250372	3	58188	0.0051557	0	58188	0	0	58188	0	1	58188	0.00171857	11	58188	0.0189042	11	58188	0.0189042	4	58188	0.00687427	1	58188	0.00171857	0	58188	0	0	58188	0	0	58188	0	4	58188	0.00687427	2	58188	0.00343713	0	58188	0
Texcoconibacillus	0.417962	0.00103114	0.000841923	0.00257785	0.00171857	0.00343713	0.00430868	0	58188	0	2	58188	0.00343713	3	58188	0.0051557	1	58188	0.00171857	1	58188	0.00171857	1	58188	0.00171857	3	58188	0.0051557	1	58188	0.00171857	1	58188	0.00171857	1	58188	0.00171857	1	58188	0.00171857	0	58188	0	2	58188	0.00343713	1	58188	0.00171857
Acidilutibacter	0.527536	0.000687427	0.000841923	0.00193339	0.00181011	0.00171857	0.00225013	2	58188	0.00343713	0	58188	0	1	58188	0.00171857	1	58188	0.00171857	2	58188	0.00343713	0	58188	0	0	58188	0	3	58188	0.0051557	1	58188	0.00171857	1	58188	0.00171857	0	58188	0	0	58188	0	0	58188	0	1	58188	0.00171857
Agromyces	0.0926248	0.000687427	0.00137485	0.00300749	0.00427488	0.0147306	0.0174744	0	58188	0	0	58188	0	0	58188	0	0	58188	0	3	58188	0.0051557	0	58188	0	7	58188	0.01203	4	58188	0.00687427	33	58188	0.0567127	4	58188	0.00687427	1	58188	0.00171857	8	58188	0.0137485	4	58188	0.00687427	6	58188	0.0103114
Aquicella	0.383362	0.000687427	0.000841923	0.00451124	0.00477946	0.00785631	0.0123879	0	58188	0	4	58188	0.00687427	3	58188	0.0051557	0	58188	0	3	58188	0.0051557	1	58188	0.00171857	9	58188	0.0154671	1	58188	0.00171857	0	58188	0	8	58188	0.0137485	0	58188	0	0	58188	0	21	58188	0.0360899	1	58188	0.00171857
Atribacter	0.258623	0.000687427	0.00137485	0.000214821	0.000568363	0.00638325	0.0115729	0	58188	0	0	58188	0	0	58188	0	0	58188	0	1	58188	0.00171857	0	58188	0	0	58188	0	0	58188	0	1	58188	0.00171857	20	58188	0.0343713	0	58188	0	0	58188	0	3	58188	0.0051557	0	58188	0
Caldisalinibacter	0.187125	0.000687427	0.000841923	0.000859284	0.00148832	0.00417366	0.00557691	2	58188	0.00343713	0	58188	0	0	58188	0	0	58188	0	2	58188	0.00343713	0	58188	0	0	58188	0	0	58188	0	0	58188	0	9	58188	0.0154671	0	58188	0	3	58188	0.0051557	0	58188	0	5	58188	0.00859284
Chryseobacterium	0.19818	0.000687427	0.00137485	0.00580016	0.00654058	0.0284791	0.0434365	6	58188	0.0103114	1	58188	0.00171857	12	58188	0.0206228	0	58188	0	4	58188	0.00687427	1	58188	0.00171857	0	58188	0	3	58188	0.0051557	6	58188	0.0103114	8	58188	0.0137485	9	58188	0.0154671	78	58188	0.134048	2	58188	0.00343713	11	58188	0.0189042
Citroniella	0.452916	0.000687427	0.00137485	0.000214821	0.000568363	0.000982039	0.00125186	0	58188	0	0	58188	0	0	58188	0	0	58188	0	1	58188	0.00171857	0	58188	0	0	58188	0	0	58188	0	1	58188	0.00171857	1	58188	0.00171857	0	58188	0	0	58188	0	0	58188	0	2	58188	0.00343713
Cuneatibacter	0.307255	0.000687427	0.000841923	0.0040816	0.00549791	0.00417366	0.00273388	9	58188	0.0154671	6	58188	0.0103114	0	58188	0	0	58188	0	3	58188	0.0051557	1	58188	0.00171857	0	58188	0	0	58188	0	2	58188	0.00343713	3	58188	0.0051557	5	58188	0.00859284	0	58188	0	1	58188	0.00171857	4	58188	0.00687427
Fluviispira	0.0160414	0.000687427	0.00137485	0.00365196	0.00337618	0.0159581	0.0133977	0	58188	0	5	58188	0.00859284	1	58188	0.00171857	0	58188	0	3	58188	0.0051557	0	58188	0	4	58188	0.00687427	4	58188	0.00687427	1	58188	0.00171857	1	58188	0.00171857	10	58188	0.0171857	9	58188	0.0154671	14	58188	0.0240599	25	58188	0.0429642
Gracilinema	0.290767	0.000687427	0.00137485	0.0040816	0.00420413	0.00270061	0.00329386	8	58188	0.0137485	1	58188	0.00171857	3	58188	0.0051557	4	58188	0.00687427	1	58188	0.00171857	1	58188	0.00171857	0	58188	0	1	58188	0.00171857	6	58188	0.0103114	1	58188	0.00171857	1	58188	0.00171857	0	58188	0	0	58188	0	2	58188	0.00343713
Insolitispirillum	0.144742	0.000687427	0.000841923	0.00494088	0.00348381	0.0132575	0.0163996	4	58188	0.00687427	0	58188	0	4	58188	0.00687427	5	58188	0.00859284	1	58188	0.00171857	2	58188	0.00343713	6	58188	0.0103114	1	58188	0.00171857	0	58188	0	25	58188	0.0429642	20	58188	0.0343713	3	58188	0.0051557	4	58188	0.00687427	2	58188	0.00343713
Isachenkonia	0.143123	0.000687427	0.000841923	0.00429642	0.00478429	0.00540121	0.00336626	7	58188	0.01203	1	58188	0.00171857	0	58188	0	3	58188	0.0051557	2	58188	0.00343713	0	58188	0	7	58188	0.01203	0	58188	0	2	58188	0.00343713	7	58188	0.01203	5	58188	0.00859284	2	58188	0.00343713	1	58188	0.00171857	3	58188	0.0051557
Lacihabitans	0.245956	0.000687427	0.00137485	0.00257785	0.00343713	0.000491019	0.00077637	0	58188	0	0	58188	0	0	58188	0	0	58188	0	5	58188	0.00859284	0	58188	0	3	58188	0.0051557	4	58188	0.00687427	0	58188	0	0	58188	0	0	58188	0	1	58188	0.00171857	1	58188	0.00171857	0	58188	0
Mannheimia	0.410212	0.000687427	0.000841923	0.00537052	0.00559772	0.0294612	0.0631938	3	58188	0.0051557	2	58188	0.00343713	1	58188	0.00171857	1	58188	0.00171857	11	58188	0.0189042	5	58188	0.00859284	1	58188	0.00171857	1	58188	0.00171857	0	58188	0	0	58188	0	1	58188	0.00171857	2	58188	0.00343713	107	58188	0.183887	8	58188	0.0137485
Nocardioides	0.539223	0.000687427	0.000841923	0.00128893	0.00187277	0.00220959	0.00300687	1	58188	0.00171857	0	58188	0	2	58188	0.00343713	0	58188	0	0	58188	0	3	58188	0.0051557	0	58188	0	0	58188	0	0	58188	0	2	58188	0.00343713	0	58188	0	2	58188	0.00343713	0	58188	0	0	58188	0
Pasteurella	0.197969	0.000687427	0.000841923	0.00558534	0.00641592	0.00270061	0.00240549	3	58188	0.0051557	0	58188	0	0	58188	0	12	58188	0.0206228	5	58188	0.00859284	4	58188	0.00687427	1	58188	0.00171857	1	58188	0.00171857	2	58188	0.00343713	0	58188	0	1	58188	0.00171857	3	58188	0.0051557	4	58188	0.00687427	1	58188	0.00171857
Planktothrix	0.000587389	0.000687427	0.00137485	0.010741	0.00513777	0.00270061	0.00288409	3	58188	0.0051557	6	58188	0.0103114	4	58188	0.00687427	5	58188	0.00859284	9	58188	0.0154671	8	58188	0.0137485	12	58188	0.0206228	3	58188	0.0051557	0	58188	0	1	58188	0.00171857	5	58188	0.00859284	1	58188	0.00171857	0	58188	0	1	58188	0.00171857
Pradoshia	0.414603	0.000687427	0.00137485	0.00429642	0.00446497	0.00540121	0.0080832	5	58188	0.00859284	1	58188	0.00171857	3	58188	0.0051557	0	58188	0	1	58188	0.00171857	8	58188	0.0137485	0	58188	0	2	58188	0.00343713	1	58188	0.00171857	14	58188	0.0240599	1	58188	0.00171857	0	58188	0	5	58188	0.00859284	1	58188	0.00171857
Proteiniphilum	0.551347	0.000687427	0.00137485	0.00236303	0.00402467	0.00270061	0.00240549	0	58188	0	0	58188	0	0	58188	0	0	58188	0	0	58188	0	3	58188	0.0051557	7	58188	0.01203	1	58188	0.00171857	1	58188	0.00171857	4	58188	0.00687427	0	58188	0	0	58188	0	1	58188	0.00171857	3	58188	0.0051557
Proteinivorax	0.667227	0.000687427	0.00137485	0.0010741	0.00170509	0.00171857	0.00225013	1	58188	0.00171857	0	58188	0	0	58188	0	0	58188	0	0	58188	0	1	58188	0.00171857	3	58188	0.0051557	0	58188	0	3	58188	0.0051557	0	58188	0	0	58188	0	0	58188	0	0	58188	0	1	58188	0.00171857
Spiroplasma	0.124976	0.000687427	0.00137485	0.00128893	0.00187277	0.0051557	0.00588199	3	58188	0.0051557	2	58188	0.00343713	0	58188	0	0	58188	0	1	58188	0.00171857	0	58188	0	0	58188	0	0	58188	0	3	58188	0.0051557	11	58188	0.0189042	3	58188	0.0051557	1	58188	0.00171857	1	58188	0.00171857	2	58188	0.00343713
Ureaplasma	0.353636	0.000687427	0.00137485	0.00150375	0.00337618	0.00368264	0.00435044	0	58188	0	6	58188	0.0103114	1	58188	0.00171857	0	58188	0	0	58188	0	0	58188	0	0	58188	0	0	58188	0	0	58188	0	7	58188	0.01203	5	58188	0.00859284	1	58188	0.00171857	0	58188	0	1	58188	0.00171857
Vibrio	0.00606979	0.000687427	0.000841923	0.00365196	0.003265	0.0076108	0.00354079	5	58188	0.00859284	0	58188	0	0	58188	0	3	58188	0.0051557	5	58188	0.00859284	1	58188	0.00171857	1	58188	0.00171857	2	58188	0.00343713	4	58188	0.00687427	4	58188	0.00687427	5	58188	0.00859284	4	58188	0.00687427	3	58188	0.0051557	2	58188	0.00343713
Anaerobacterium	0.157772	0.000343713	0.000687427	0.0051557	0.00744162	0.0149761	0.0185258	13	58188	0.0223414	1	58188	0.00171857	6	58188	0.0103114	0	58188	0	0	58188	0	4	58188	0.00687427	0	58188	0	0	58188	0	0	58188	0	34	58188	0.0584313	9	58188	0.0154671	6	58188	0.0103114	0	58188	0	6	58188	0.0103114
Desulfocella	0.412011	0.000343713	0.000687427	0.00171857	0.00227345	0.000982039	0.00125186	2	58188	0.00343713	0	58188	0	0	58188	0	0	58188	0	1	58188	0.00171857	0	58188	0	4	58188	0.00687427	1	58188	0.00171857	0	58188	0	1	58188	0.00171857	0	58188	0	0	58188	0	1	58188	0.00171857	2	58188	0.00343713
Faecalibacillus	0.112703	0.000343713	0.000687427	0.00708909	0.00458229	0.00982039	0.0103406	3	58188	0.0051557	9	58188	0.0154671	5	58188	0.00859284	0	58188	0	6	58188	0.0103114	5	58188	0.00859284	4	58188	0.00687427	1	58188	0.00171857	3	58188	0.0051557	20	58188	0.0343713	4	58188	0.00687427	4	58188	0.00687427	6	58188	0.0103114	1	58188	0.00171857
Gp15	0.224097	0.000343713	0.000687427	0.00837802	0.010816	0.0051557	0.00367445	1	58188	0.00171857	2	58188	0.00343713	5	58188	0.00859284	0	58188	0	4	58188	0.00687427	2	58188	0.00343713	21	58188	0.0360899	4	58188	0.00687427	2	58188	0.00343713	7	58188	0.01203	5	58188	0.00859284	3	58188	0.0051557	2	58188	0.00343713	2	58188	0.00343713
Gp2	0.271762	0.000343713	0.000687427	0.000429642	0.000744162	0.00171857	0.00243042	0	58188	0	0	58188	0	0	58188	0	0	58188	0	1	58188	0.00171857	1	58188	0.00171857	0	58188	0	0	58188	0	2	58188	0.00343713	0	58188	0	0	58188	0	0	58188	0	1	58188	0.00171857	4	58188	0.00687427
Helicobacter	0.077075	0.000343713	0.000687427	0.00300749	0.00306826	0.00417366	0.00257493	2	58188	0.00343713	1	58188	0.00171857	2	58188	0.00343713	0	58188	0	0	58188	0	2	58188	0.00343713	6	58188	0.0103114	1	58188	0.00171857	1	58188	0.00171857	2	58188	0.00343713	5	58188	0.00859284	0	58188	0	3	58188	0.0051557	3	58188	0.0051557
Inquilinus	0.0574146	0.000343713	0.000687427	0.00257785	0.00420961	0.0117845	0.0122361	4	58188	0.00687427	1	58188	0.00171857	7	58188	0.01203	0	58188	0	0	58188	0	0	58188	0	0	58188	0	0	58188	0	23	58188	0.0395271	5	58188	0.00859284	1	58188	0.00171857	10	58188	0.0171857	4	58188	0.00687427	3	58188	0.0051557
Massiliimalia	0.281141	0.000343713	0.000687427	0.00343713	0.00478429	0.00147306	0.00143155	2	58188	0.00343713	0	58188	0	0	58188	0	1	58188	0.00171857	0	58188	0	8	58188	0.0137485	5	58188	0.00859284	0	58188	0	2	58188	0.00343713	2	58188	0.00343713	1	58188	0.00171857	0	58188	0	1	58188	0.00171857	0	58188	0
Nautilia	0.098356	0.000343713	0.000687427	0.00537052	0.00378841	0.00392815	0.00437806	4	58188	0.00687427	2	58188	0.00343713	2	58188	0.00343713	0	58188	0	2	58188	0.00343713	7	58188	0.01203	6	58188	0.0103114	2	58188	0.00343713	1	58188	0.00171857	8	58188	0.0137485	3	58188	0.0051557	0	58188	0	2	58188	0.00343713	2	58188	0.00343713
Orientia	0.200719	0.000343713	0.000687427	0.00322231	0.00314989	0.00613774	0.00751115	1	58188	0.00171857	2	58188	0.00343713	1	58188	0.00171857	6	58188	0.0103114	3	58188	0.0051557	0	58188	0	0	58188	0	2	58188	0.00343713	0	58188	0	14	58188	0.0240599	3	58188	0.0051557	2	58188	0.00343713	3	58188	0.0051557	1	58188	0.00171857
Petrotoga	0.355562	0.000343713	0.000687427	0.00322231	0.00249599	0.00319163	0.00514985	3	58188	0.0051557	1	58188	0.00171857	2	58188	0.00343713	0	58188	0	1	58188	0.00171857	1	58188	0.00171857	5	58188	0.00859284	2	58188	0.00343713	2	58188	0.00343713	9	58188	0.0154671	0	58188	0	0	58188	0	1	58188	0.00171857	1	58188	0.00171857
Phaeovibrio	0.218332	0.000343713	0.000687427	0.00472606	0.00574822	0.00196408	0.0029665	2	58188	0.00343713	0	58188	0	10	58188	0.0171857	0	58188	0	0	58188	0	1	58188	0.00171857	3	58188	0.0051557	6	58188	0.0103114	0	58188	0	0	58188	0	5	58188	0.00859284	0	58188	0	0	58188	0	1	58188	0.00171857
Photobacterium	0.399922	0.000343713	0.000687427	0.00322231	0.00290604	0.0024551	0.00476061	5	58188	0.00859284	0	58188	0	0	58188	0	0	58188	0	2	58188	0.00343713	3	58188	0.0051557	2	58188	0.00343713	3	58188	0.0051557	2	58188	0.00343713	0	58188	0	8	58188	0.0137485	0	58188	0	0	58188	0	0	58188	0
Pseudorhizobium	0.210481	0.000343713	0.000687427	0.00622981	0.00594942	0.00711978	0.00818693	2	58188	0.00343713	2	58188	0.00343713	12	58188	0.0206228	6	58188	0.0103114	2	58188	0.00343713	2	58188	0.00343713	1	58188	0.00171857	2	58188	0.00343713	14	58188	0.0240599	0	58188	0	1	58188	0.00171857	8	58188	0.0137485	3	58188	0.0051557	0	58188	0
Streptobacillus	0.219236	0.000343713	0.000687427	0.00171857	0.00271729	0.00319163	0.0029665	5	58188	0.00859284	0	58188	0	1	58188	0.00171857	1	58188	0.00171857	0	58188	0	0	58188	0	1	58188	0.00171857	0	58188	0	1	58188	0.00171857	5	58188	0.00859284	4	58188	0.00687427	0	58188	0	1	58188	0.00171857	1	58188	0.00171857
Thiomicrorhabdus	0.0119686	0.000343713	0.000687427	0.00429642	0.00297665	0.00147306	0.00109795	6	58188	0.0103114	1	58188	0.00171857	2	58188	0.00343713	0	58188	0	2	58188	0.00343713	4	58188	0.00687427	3	58188	0.0051557	2	58188	0.00343713	0	58188	0	2	58188	0.00343713	1	58188	0.00171857	0	58188	0	1	58188	0.00171857	1	58188	0.00171857
Actinopolyspora	0.377219	0	0	0.00193339	0.00263976	0.000982039	0.00240549	0	58188	0	0	58188	0	0	58188	0	0	58188	0	0	58188	0	4	58188	0.00687427	2	58188	0.00343713	3	58188	0.0051557	4	58188	0.00687427	0	58188	0	0	58188	0	0	58188	0	0	58188	0	0	58188	0
Dubosiella	0.0683642	0	0	0.00128893	0.00281735	0.00982039	0.0116455	1	58188	0.00171857	5	58188	0.00859284	0	58188	0	0	58188	0	0	58188	0	0	58188	0	0	58188	0	0	58188	0	8	58188	0.0137485	20	58188	0.0343713	1	58188	0.00171857	9	58188	0.0154671	0	58188	0	2	58188	0.00343713
Flectobacillus	0.133506	0	0	0.00257785	0.00227345	0.00171857	0.00225013	0	58188	0	2	58188	0.00343713	0	58188	0	1	58188	0.00171857	3	58188	0.0051557	1	58188	0.00171857	1	58188	0.00171857	4	58188	0.00687427	4	58188	0.00687427	0	58188	0	0	58188	0	1	58188	0.00171857	1	58188	0.00171857	1	58188	0.00171857
Geomonas	0.258749	0	0	0.00214821	0.00281735	0.00220959	0.0023803	0	58188	0	0	58188	0	0	58188	0	5	58188	0.00859284	1	58188	0.00171857	0	58188	0	2	58188	0.00343713	2	58188	0.00343713	0	58188	0	2	58188	0.00343713	0	58188	0	0	58188	0	4	58188	0.00687427	1	58188	0.00171857
Hahella	0.591673	0	0	0.000644463	0.000831998	0.000736529	0.00180412	1	58188	0.00171857	1	58188	0.00171857	0	58188	0	0	58188	0	1	58188	0.00171857	0	58188	0	0	58188	0	0	58188	0	0	58188	0	0	58188	0	3	58188	0.0051557	0	58188	0	0	58188	0	0	58188	0
Hydrogenispora	0.045292	0	0	0.0040816	0.00373937	0.00122755	0.0017704	1	58188	0.00171857	2	58188	0.00343713	0	58188	0	1	58188	0.00171857	1	58188	0.00171857	6	58188	0.0103114	2	58188	0.00343713	6	58188	0.0103114	1	58188	0.00171857	0	58188	0	3	58188	0.0051557	0	58188	0	0	58188	0	1	58188	0.00171857
Kiritimatiella	0.380216	0	0	0.0051557	0.0105591	0.000736529	0.00125186	0	58188	0	0	58188	0	2	58188	0.00343713	0	58188	0	3	58188	0.0051557	19	58188	0.0326528	0	58188	0	0	58188	0	0	58188	0	2	58188	0.00343713	0	58188	0	0	58188	0	0	58188	0	1	58188	0.00171857
Magnetospirillum	0.113495	0	0	0.00386678	0.00362023	0.00368264	0.00336626	0	58188	0	1	58188	0.00171857	3	58188	0.0051557	2	58188	0.00343713	0	58188	0	3	58188	0.0051557	7	58188	0.01203	2	58188	0.00343713	1	58188	0.00171857	6	58188	0.0103114	4	58188	0.00687427	1	58188	0.00171857	0	58188	0	2	58188	0.00343713
Magnetovibrio	0.00660209	0	0	0.000429642	0.000744162	0.00343713	0.00275584	0	58188	0	0	58188	0	1	58188	0.00171857	1	58188	0.00171857	0	58188	0	0	58188	0	0	58188	0	0	58188	0	2	58188	0.00343713	0	58188	0	3	58188	0.0051557	2	58188	0.00343713	2	58188	0.00343713	5	58188	0.00859284
Mesobacillus	0.325427	0	0	0.00300749	0.00391422	0.00319163	0.00435044	2	58188	0.00343713	0	58188	0	3	58188	0.0051557	0	58188	0	0	58188	0	7	58188	0.01203	2	58188	0.00343713	0	58188	0	0	58188	0	7	58188	0.01203	2	58188	0.00343713	0	58188	0	4	58188	0.00687427	0	58188	0
Oligella	0.0619952	0	0	0.00708909	0.00466216	0.011539	0.0108969	9	58188	0.0154671	7	58188	0.01203	4	58188	0.00687427	1	58188	0.00171857	4	58188	0.00687427	0	58188	0	4	58188	0.00687427	4	58188	0.00687427	1	58188	0.00171857	4	58188	0.00687427	17	58188	0.0292156	0	58188	0	1	58188	0.00171857	11	58188	0.0189042
Psychromonas	0.059403	0	0	0.00537052	0.00566329	0.0159581	0.0161141	3	58188	0.0051557	7	58188	0.01203	9	58188	0.0154671	0	58188	0	1	58188	0.00171857	0	58188	0	0	58188	0	5	58188	0.00859284	0	58188	0	6	58188	0.0103114	22	58188	0.0378085	0	58188	0	7	58188	0.01203	25	58188	0.0429642
Ralstonia	0.0356548	0	0	0.00236303	0.00402467	0.00785631	0.00648629	1	58188	0.00171857	0	58188	0	7	58188	0.01203	3	58188	0.0051557	0	58188	0	0	58188	0	0	58188	0	0	58188	0	5	58188	0.00859284	9	58188	0.0154671	6	58188	0.0103114	10	58188	0.0171857	0	58188	0	0	58188	0
Salmonella	0.136084	0	0	0.00322231	0.00314989	0.00368264	0.00360824	5	58188	0.00859284	4	58188	0.00687427	2	58188	0.00343713	1	58188	0.00171857	3	58188	0.0051557	0	58188	0	0	58188	0	0	58188	0	1	58188	0.00171857	0	58188	0	4	58188	0.00687427	6	58188	0.0103114	3	58188	0.0051557	0	58188	0
Snodgrassella	0.0680276	0	0	0.00386678	0.00318631	0.00417366	0.00341955	0	58188	0	2	58188	0.00343713	3	58188	0.0051557	5	58188	0.00859284	0	58188	0	1	58188	0.00171857	2	58188	0.00343713	5	58188	0.00859284	0	58188	0	6	58188	0.0103114	3	58188	0.0051557	2	58188	0.00343713	4	58188	0.00687427	2	58188	0.00343713
[truncated: 18 more columns]

## Sheet: 4B
Supplementry Table 4B : Groupwise and samplewise mean relative abundance (%) of bacterial genera present in rumen liquid fraction.
Genus	p-values	MS: mean rel. freq. (%)	MS: std. dev. (%)	20%MLM: mean rel. freq. (%)	20%MLM: std. dev. (%)	30%MLM: mean rel. freq. (%)	30%MLM: std. dev. (%)	G21L	G21L: parent seq. count	G21L: rel. freq. (%)	G22L	G22L: parent seq. count	G22L: rel. freq. (%)	G23L	G23L: parent seq. count	G23L: rel. freq. (%)	G24L	G24L: parent seq. count	G24L: rel. freq. (%)	G28L	G28L: parent seq. count	G28L: rel. freq. (%)	G310L	G310L: parent seq. count	G310L: rel. freq. (%)	G31L	G31L: parent seq. count	G31L: rel. freq. (%)	G32L	G32L: parent seq. count	G32L: rel. freq. (%)	G33L	G33L: parent seq. count	G33L: rel. freq. (%)	G34L	G34L: parent seq. count	G34L: rel. freq. (%)	G35L	G35L: parent seq. count	G35L: rel. freq. (%)	G37L	G37L: parent seq. count	G37L: rel. freq. (%)	G38L	G38L: parent seq. count	G38L: rel. freq. (%)	G39L	G39L: parent seq. count	G39L: rel. freq. (%)
Segatella	0.0478907	11.3635	2.84091	6.28798	2.35813	10.5969	3.2055	4525	53289	8.49143	1290	53289	2.42076	2500	53289	4.6914	4084	53289	7.66387	4355	53289	8.17242	2530	53289	4.7477	4426	53289	8.30565	7546	53289	14.1605	8687	53289	16.3017	6735	53289	12.6386	5421	53289	10.1728	4999	53289	9.38092	4908	53289	9.21016	5571	53289	10.4543
Xylanibacter	0.909362	8.0542	3.5971	8.59615	3.09479	9.02604	3.50179	4743	53289	8.90052	2485	53289	4.66325	4554	53289	8.54585	7466	53289	14.0104	3656	53289	6.8607	1556	53289	2.91993	3276	53289	6.14761	6296	53289	11.8148	4018	53289	7.54002	7830	53289	14.6935	5346	53289	10.0321	5944	53289	11.1543	6043	53289	11.3401	2980	53289	5.59215
Subdivision5_genera_incertae_sedis	0.00241336	6.24191	2.42582	14.57	6.57963	5.06296	0.938106	4185	53289	7.8534	14230	53289	26.7034	7016	53289	13.1659	5280	53289	9.90824	8110	53289	15.2189	2695	53289	5.05733	3781	53289	7.09527	2673	53289	5.01604	2101	53289	3.94265	3305	53289	6.20203	2210	53289	4.1472	2489	53289	4.67076	2489	53289	4.67076	2539	53289	4.76459
Sodaliphilus	0.0149981	4.38646	2.59419	3.23819	1.79938	1.1178	0.503852	741	53289	1.39053	1371	53289	2.57276	3397	53289	6.37467	988	53289	1.85404	2131	53289	3.99895	563	53289	1.0565	977	53289	1.8334	303	53289	0.568598	932	53289	1.74895	549	53289	1.03023	948	53289	1.77898	421	53289	0.790032	404	53289	0.75813	264	53289	0.495412
Hallella	0.152125	3.17045	1.91276	1.55604	0.562083	2.50708	0.740786	958	53289	1.79774	368	53289	0.690574	641	53289	1.20287	934	53289	1.75271	1245	53289	2.33632	402	53289	0.754377	1463	53289	2.74541	1662	53289	3.11884	1728	53289	3.2427	1247	53289	2.34007	1187	53289	2.22748	1281	53289	2.40387	1255	53289	2.35508	1799	53289	3.37593
Kandleria	0.123428	2.78669	3.02654	7.93822	9.1888	0.893034	2.1294	927	53289	1.73957	1938	53289	3.63677	13934	53289	26.148	2923	53289	5.48518	1429	53289	2.6816	166	53289	0.311509	7	53289	0.0131359	9	53289	0.016889	3679	53289	6.90386	23	53289	0.0431609	29	53289	0.0544202	168	53289	0.315262	185	53289	0.347164	17	53289	0.0319015
Succiniclasticum	0.186137	2.57746	1.6782	1.35187	0.997728	1.40638	0.386427	659	53289	1.23665	1728	53289	3.2427	157	53289	0.29462	486	53289	0.912008	572	53289	1.07339	401	53289	0.752501	565	53289	1.06026	1056	53289	1.98165	1094	53289	2.05296	813	53289	1.52564	675	53289	1.26668	712	53289	1.33611	721	53289	1.353	708	53289	1.3286
Olsenella	0.00590997	2.52257	1.67931	0.86059	0.428301	0.448706	0.114569	545	53289	1.02273	804	53289	1.50875	533	53289	1.00021	201	53289	0.377189	210	53289	0.394078	263	53289	0.493535	295	53289	0.553585	166	53289	0.311509	224	53289	0.420349	119	53289	0.223311	301	53289	0.564845	245	53289	0.459757	224	53289	0.420349	315	53289	0.591116
Prevotella	0.239178	2.10315	0.811342	1.28056	0.463032	1.7698	0.64788	763	53289	1.43182	269	53289	0.504795	552	53289	1.03586	951	53289	1.78461	877	53289	1.64574	200	53289	0.375312	1056	53289	1.98165	1288	53289	2.41701	1313	53289	2.46392	1372	53289	2.57464	799	53289	1.49937	834	53289	1.56505	841	53289	1.57819	785	53289	1.4731
Lucifera	0.107507	1.71987	0.572608	6.45574	4.89694	2.65971	2.57939	3144	53289	5.8999	8537	53289	16.0202	1608	53289	3.01751	2288	53289	4.29357	1624	53289	3.04753	5097	53289	9.56483	942	53289	1.76772	788	53289	1.47873	437	53289	0.820057	403	53289	0.756254	753	53289	1.41305	1749	53289	3.2821	1661	53289	3.11697	926	53289	1.73769
Slackia	0.0489868	1.55754	1.80771	0.201918	0.0727718	0.0717263	0.0591226	167	53289	0.313386	70	53289	0.131359	127	53289	0.238323	113	53289	0.212051	61	53289	0.11447	108	53289	0.202668	9	53289	0.016889	9	53289	0.016889	16	53289	0.030025	11	53289	0.0206422	65	53289	0.121976	57	53289	0.106964	38	53289	0.0713093	31	53289	0.0581734
Butyrivibrio	0.749277	1.54066	1.14302	2.13065	0.922285	1.96872	1.12493	1880	53289	3.52793	564	53289	1.05838	627	53289	1.1766	1381	53289	2.59153	1225	53289	2.29879	2383	53289	4.47184	583	53289	1.09403	406	53289	0.761883	1184	53289	2.22185	1552	53289	2.91242	498	53289	0.934527	1135	53289	2.1299	1136	53289	2.13177	565	53289	1.06026
Treponema	0.0391965	1.51063	0.798781	0.793785	0.645147	0.503335	0.251878	229	53289	0.429732	134	53289	0.251459	223	53289	0.418473	451	53289	0.846329	1078	53289	2.02293	102	53289	0.191409	184	53289	0.345287	164	53289	0.307756	275	53289	0.516054	597	53289	1.12031	223	53289	0.418473	320	53289	0.600499	317	53289	0.594869	232	53289	0.435362
Streptophyta	0.0930689	1.29107	1.01128	0.539699	0.420377	0.470391	0.199728	114	53289	0.213928	196	53289	0.367806	730	53289	1.36989	221	53289	0.41472	177	53289	0.332151	199	53289	0.373435	146	53289	0.273978	90	53289	0.16889	416	53289	0.780649	177	53289	0.332151	209	53289	0.392201	305	53289	0.572351	322	53289	0.604252	392	53289	0.735611
Syntrophococcus	0.00709547	1.21038	0.481027	0.426354	0.149313	1.06505	0.303802	322	53289	0.604252	304	53289	0.570474	139	53289	0.260842	238	53289	0.446621	133	53289	0.249582	394	53289	0.739365	597	53289	1.12031	895	53289	1.67952	546	53289	1.0246	319	53289	0.598623	489	53289	0.917638	545	53289	1.02273	587	53289	1.10154	736	53289	1.38115
Leyella	0.251067	1.20663	0.444697	1.02723	0.365342	1.68432	0.837215	508	53289	0.953292	528	53289	0.990824	919	53289	1.72456	374	53289	0.701833	408	53289	0.765636	276	53289	0.517931	1259	53289	2.36259	648	53289	1.21601	309	53289	0.579857	1000	53289	1.87656	635	53289	1.19162	1560	53289	2.92743	1487	53289	2.79044	904	53289	1.69641
Saccharofermentans	0.0370221	1.17566	0.30557	1.72794	1.37128	3.80504	1.98419	2274	53289	4.2673	575	53289	1.07902	296	53289	0.555462	372	53289	0.69808	1087	53289	2.03982	4863	53289	9.12571	1870	53289	3.50917	1237	53289	2.3213	1017	53289	1.90846	1479	53289	2.77543	2041	53289	3.83006	1921	53289	3.60487	1835	53289	3.44349	1986	53289	3.72685
Pseudobutyrivibrio	0.332607	1.15033	1.21895	0.941282	0.865279	0.458715	0.19838	521	53289	0.977688	195	53289	0.365929	139	53289	0.260842	1386	53289	2.60091	267	53289	0.501041	174	53289	0.326521	102	53289	0.191409	113	53289	0.212051	223	53289	0.418473	401	53289	0.752501	323	53289	0.606129	328	53289	0.615512	365	53289	0.684944	171	53289	0.320892
Ruminococcus	0.00225508	1.12218	0.188914	0.671433	0.332968	2.05754	0.723387	496	53289	0.930774	193	53289	0.362176	148	53289	0.277731	336	53289	0.630524	616	53289	1.15596	1236	53289	2.31943	777	53289	1.45809	1851	53289	3.47351	946	53289	1.77523	1552	53289	2.91242	473	53289	0.887613	1021	53289	1.91597	1059	53289	1.98728	953	53289	1.78836
Paraprevotella	0.00893538	1.10717	0.31363	0.614386	0.313341	2.2575	1.06209	436	53289	0.81818	221	53289	0.41472	181	53289	0.339657	194	53289	0.364053	605	53289	1.13532	255	53289	0.478523	1417	53289	2.65909	1008	53289	1.89157	880	53289	1.65137	628	53289	1.17848	2225	53289	4.17535	1291	53289	2.42264	1282	53289	2.40575	1841	53289	3.45475
Hoylesella	0.0364617	1.08371	0.233292	0.554711	0.235843	0.756254	0.265338	455	53289	0.853835	122	53289	0.22894	233	53289	0.437238	425	53289	0.797538	243	53289	0.456004	215	53289	0.40346	460	53289	0.863218	524	53289	0.983317	589	53289	1.10529	623	53289	1.1691	346	53289	0.64929	260	53289	0.487906	285	53289	0.53482	325	53289	0.609882
Selenomonas	0.662342	1.06073	0.406535	0.717972	0.587796	0.834235	0.509737	506	53289	0.949539	82	53289	0.153878	208	53289	0.390324	941	53289	1.76584	176	53289	0.330275	89	53289	0.167014	186	53289	0.34904	996	53289	1.86905	810	53289	1.52001	304	53289	0.570474	474	53289	0.889489	371	53289	0.696204	394	53289	0.739365	377	53289	0.707463
Parabacteroides	0.049755	1.00443	0.113446	0.865469	0.290433	2.0859	1.1496	732	53289	1.37364	252	53289	0.472893	414	53289	0.776896	441	53289	0.827563	467	53289	0.876353	377	53289	0.707463	1479	53289	2.77543	1019	53289	1.91221	1137	53289	2.13365	2642	53289	4.95787	642	53289	1.20475	895	53289	1.67952	914	53289	1.71518	899	53289	1.68703
Anseongella	0.0639186	0.964552	0.519317	0.306255	0.237049	1.1889	0.695359	59	53289	0.110717	76	53289	0.142619	121	53289	0.227064	153	53289	0.287114	407	53289	0.76376	135	53289	0.253336	689	53289	1.29295	1390	53289	2.60842	109	53289	0.204545	481	53289	0.902625	866	53289	1.6251	642	53289	1.20475	534	53289	1.00208	856	53289	1.60634
Fibrobacter	0.222904	0.947194	0.95922	0.488281	0.340971	0.345496	0.180255	180	53289	0.337781	56	53289	0.105087	147	53289	0.275854	571	53289	1.07152	347	53289	0.651166	30	53289	0.0562968	175	53289	0.328398	187	53289	0.350917	218	53289	0.40909	389	53289	0.729982	65	53289	0.121976	210	53289	0.394078	215	53289	0.40346	168	53289	0.315262
Fretibacterium	0.713393	0.838353	0.800149	0.508172	0.410394	0.83361	0.743598	569	53289	1.06776	18	53289	0.0337781	83	53289	0.155754	485	53289	0.910132	199	53289	0.373435	136	53289	0.255212	356	53289	0.668055	1478	53289	2.77356	168	53289	0.315262	174	53289	0.326521	162	53289	0.304003	506	53289	0.949539	493	53289	0.925144	525	53289	0.985194
Luoshenia	0.24484	0.808797	0.290921	1.43106	0.427488	0.902625	0.69126	1084	53289	2.03419	707	53289	1.32673	801	53289	1.50312	381	53289	0.714969	840	53289	1.57631	1451	53289	2.72289	339	53289	0.636154	241	53289	0.452251	222	53289	0.416596	220	53289	0.412843	256	53289	0.480399	588	53289	1.10342	551	53289	1.03398	461	53289	0.865094
Lachnospira	0.232907	0.754846	1.06847	0.179024	0.0576516	0.191618	0.102949	146	53289	0.273978	70	53289	0.131359	113	53289	0.212051	86	53289	0.161384	62	53289	0.116347	133	53289	0.249582	62	53289	0.116347	30	53289	0.0562968	115	53289	0.215804	83	53289	0.155754	81	53289	0.152001	197	53289	0.369682	177	53289	0.332151	41	53289	0.076939
Dysgonomonas	0.00608839	0.688228	0.2409	0.17452	0.124296	0.525228	0.200488	96	53289	0.18015	44	53289	0.0825686	68	53289	0.127606	38	53289	0.0713093	219	53289	0.410967	64	53289	0.1201	367	53289	0.688697	390	53289	0.731858	416	53289	0.780649	280	53289	0.525437	180	53289	0.337781	324	53289	0.608005	294	53289	0.551709	204	53289	0.382818
Bilifractor	0.156519	0.661487	0.237922	0.410967	0.130849	0.735403	0.318594	278	53289	0.521684	274	53289	0.514177	261	53289	0.489782	185	53289	0.347164	97	53289	0.182026	385	53289	0.722476	463	53289	0.868847	220	53289	0.412843	250	53289	0.46914	159	53289	0.298373	303	53289	0.568598	501	53289	0.940157	514	53289	0.964552	732	53289	1.37364
Barnesiella	0.268598	0.658203	0.370031	0.33065	0.37174	0.358214	0.192383	57	53289	0.106964	25	53289	0.046914	148	53289	0.277731	87	53289	0.163261	564	53289	1.05838	81	53289	0.152001	169	53289	0.317139	186	53289	0.34904	51	53289	0.0957046	67	53289	0.12573	301	53289	0.564845	260	53289	0.487906	248	53289	0.465387	355	53289	0.666179
Duncaniella	0.125362	0.619265	0.282555	1.00321	0.554155	0.481442	0.31821	115	53289	0.215804	250	53289	0.46914	675	53289	1.26668	804	53289	1.50875	829	53289	1.55567	121	53289	0.227064	656	53289	1.23102	178	53289	0.334028	54	53289	0.101334	382	53289	0.716846	324	53289	0.608005	207	53289	0.388448	232	53289	0.435362	155	53289	0.290867
Coprobacter	0.0828509	0.596277	0.267324	0.474019	0.337434	0.922016	0.333272	381	53289	0.714969	99	53289	0.185779	133	53289	0.249582	105	53289	0.197039	545	53289	1.02273	139	53289	0.260842	752	53289	1.41117	339	53289	0.636154	588	53289	1.10342	402	53289	0.754377	595	53289	1.11655	430	53289	0.806921	494	53289	0.927021	683	53289	1.28169
Christensenella	0.822756	0.591586	0.234635	0.608381	0.329192	0.708923	0.373218	612	53289	1.14845	437	53289	0.820057	231	53289	0.433485	136	53289	0.255212	205	53289	0.384695	906	53289	1.70016	336	53289	0.630524	223	53289	0.418473	290	53289	0.544202	184	53289	0.345287	303	53289	0.568598	390	53289	0.731858	394	53289	0.739365	374	53289	0.701833
Porcincola	0.298159	0.577511	0.392855	0.598998	0.18783	0.410133	0.0653907	399	53289	0.748747	193	53289	0.362176	369	53289	0.692451	430	53289	0.806921	205	53289	0.384695	262	53289	0.491659	229	53289	0.429732	148	53289	0.277731	264	53289	0.495412	181	53289	0.339657	236	53289	0.442868	208	53289	0.390324	225	53289	0.422226	214	53289	0.401584
Oligosphaera	0.207511	0.540449	0.443901	0.376813	0.469382	0.15492	0.0664119	77	53289	0.144495	46	53289	0.0863218	91	53289	0.170767	90	53289	0.16889	700	53289	1.31359	165	53289	0.309632	33	53289	0.0619265	74	53289	0.138865	52	53289	0.0975811	59	53289	0.110717	103	53289	0.193286	83	53289	0.155754	87	53289	0.163261	87	53289	0.163261
Solibaculum	0.148197	0.522622	0.319265	0.34904	0.215142	0.652417	0.207169	114	53289	0.213928	378	53289	0.70934	110	53289	0.206422	72	53289	0.135112	256	53289	0.480399	594	53289	1.11468	299	53289	0.561091	397	53289	0.744994	204	53289	0.382818	207	53289	0.388448	307	53289	0.576104	373	53289	0.699957	367	53289	0.688697	381	53289	0.714969
Stomatobaculum	0.119098	0.517461	0.165916	0.238698	0.159569	0.551292	0.293908	151	53289	0.283361	40	53289	0.0750624	71	53289	0.133236	93	53289	0.17452	281	53289	0.527313	84	53289	0.157631	268	53289	0.502918	196	53289	0.367806	264	53289	0.495412	201	53289	0.377189	673	53289	1.26292	278	53289	0.521684	274	53289	0.514177	406	53289	0.761883
Alistipes	0.0362865	0.513708	0.243784	0.189533	0.117425	0.486863	0.18359	96	53289	0.18015	35	53289	0.0656796	63	53289	0.118223	93	53289	0.17452	218	53289	0.40909	41	53289	0.076939	268	53289	0.502918	327	53289	0.613635	239	53289	0.448498	390	53289	0.731858	301	53289	0.564845	188	53289	0.352793	229	53289	0.429732	352	53289	0.660549
Blautia	0.0761633	0.51277	0.270434	0.449248	0.264805	0.824435	0.279126	502	53289	0.942033	144	53289	0.270225	155	53289	0.290867	124	53289	0.232693	272	53289	0.510424	228	53289	0.427856	395	53289	0.741241	676	53289	1.26855	528	53289	0.990824	675	53289	1.26668	445	53289	0.835069	317	53289	0.594869	333	53289	0.624894	357	53289	0.669932
Halothermothrix	0.0253407	0.503387	0.267317	0.256713	0.209155	0.141576	0.0874078	68	53289	0.127606	23	53289	0.0431609	49	53289	0.0919514	281	53289	0.527313	263	53289	0.493535	8	53289	0.0150125	32	53289	0.0600499	153	53289	0.287114	45	53289	0.0844452	36	53289	0.0675562	87	53289	0.163261	86	53289	0.161384	93	53289	0.17452	139	53289	0.260842
Enterocloster	0.176934	0.486498	0.219751	1.03061	1.37693	2.66263	2.44235	256	53289	0.480399	2014	53289	3.77939	169	53289	0.317139	117	53289	0.219558	190	53289	0.356546	2452	53289	4.60132	4504	53289	8.45203	195	53289	0.365929	344	53289	0.645537	260	53289	0.487906	914	53289	1.71518	1135	53289	2.1299	1083	53289	2.03231	1883	53289	3.53356
Marvinbryantia	0.0196902	0.478523	0.196067	1.1068	0.722131	0.315262	0.159656	728	53289	1.36614	329	53289	0.617388	1280	53289	2.402	395	53289	0.741241	217	53289	0.407213	292	53289	0.547955	57	53289	0.106964	68	53289	0.127606	126	53289	0.236447	262	53289	0.491659	288	53289	0.540449	140	53289	0.262718	135	53289	0.253336	144	53289	0.270225
Lancefieldella	0.0399058	0.468202	0.313791	0.272852	0.136845	0.152418	0.0585774	74	53289	0.138865	227	53289	0.425979	205	53289	0.384695	177	53289	0.332151	44	53289	0.0825686	103	53289	0.193286	59	53289	0.110717	153	53289	0.287114	77	53289	0.144495	37	53289	0.0694327	57	53289	0.106964	76	53289	0.142619	80	53289	0.150125	89	53289	0.167014
Extibacter	0.0317514	0.449905	0.304247	0.0825686	0.0288038	0.29045	0.130959	52	53289	0.0975811	65	53289	0.121976	48	53289	0.0900749	35	53289	0.0656796	20	53289	0.0375312	223	53289	0.418473	282	53289	0.52919	130	53289	0.243953	93	53289	0.17452	31	53289	0.0581734	134	53289	0.251459	157	53289	0.29462	138	53289	0.258965	205	53289	0.384695
Oribacterium	0.132242	0.448029	0.398451	0.943159	0.607224	0.369891	0.348632	1117	53289	2.09612	473	53289	0.887613	283	53289	0.531066	443	53289	0.831316	197	53289	0.369682	661	53289	1.24041	31	53289	0.0581734	28	53289	0.0525437	91	53289	0.170767	250	53289	0.46914	158	53289	0.296496	238	53289	0.446621	256	53289	0.480399	61	53289	0.11447
Succinivibrio	0.327629	0.439584	0.292973	0.193661	0.2026	0.383027	0.228286	61	53289	0.11447	23	53289	0.0431609	23	53289	0.0431609	312	53289	0.585487	97	53289	0.182026	32	53289	0.0600499	22	53289	0.0412843	399	53289	0.748747	200	53289	0.375312	159	53289	0.298373	338	53289	0.634277	160	53289	0.30025	222	53289	0.416596	305	53289	0.572351
Gehongia	0.11323	0.430201	0.212687	0.822684	0.437964	0.396371	0.28339	763	53289	1.43182	678	53289	1.27231	217	53289	0.407213	297	53289	0.557338	237	53289	0.444745	607	53289	1.13907	188	53289	0.352793	121	53289	0.227064	133	53289	0.249582	166	53289	0.311509	80	53289	0.150125	205	53289	0.384695	285	53289	0.53482	116	53289	0.217681
Berryella	0.0255823	0.410967	0.376371	0.303627	0.225473	0.0204337	0.0129543	393	53289	0.737488	87	53289	0.163261	92	53289	0.172644	166	53289	0.311509	71	53289	0.133236	27	53289	0.0506671	7	53289	0.0131359	1	53289	0.00187656	15	53289	0.0281484	11	53289	0.0206422	11	53289	0.0206422	5	53289	0.0093828	9	53289	0.016889	12	53289	0.0225187
Bacteroides	0.180231	0.40346	0.143081	0.251084	0.152939	0.444328	0.175881	276	53289	0.517931	45	53289	0.0844452	64	53289	0.1201	135	53289	0.253336	149	53289	0.279607	42	53289	0.0788155	269	53289	0.504795	226	53289	0.424103	388	53289	0.728105	282	53289	0.52919	257	53289	0.482276	173	53289	0.324645	175	53289	0.328398	319	53289	0.598623
Phocaeicola	0.176216	0.400646	0.102221	0.194412	0.0843793	0.286071	0.178105	114	53289	0.213928	45	53289	0.0844452	74	53289	0.138865	106	53289	0.198915	179	53289	0.335904	14	53289	0.0262718	110	53289	0.206422	283	53289	0.531066	237	53289	0.444745	309	53289	0.579857	65	53289	0.121976	110	53289	0.206422	115	53289	0.215804	129	53289	0.242076
Comamonas	0.169495	0.397831	0.667481	0.00450374	0.00900749	0.00771475	0.0121436	0	53289	0	0	53289	0	0	53289	0	0	53289	0	12	53289	0.0225187	0	53289	0	1	53289	0.00187656	0	53289	0	1	53289	0.00187656	0	53289	0	6	53289	0.0112594	1	53289	0.00187656	7	53289	0.0131359	21	53289	0.0394078
Vescimonas	0.00307277	0.374843	0.129662	0.241326	0.150395	1.06672	0.48591	173	53289	0.324645	80	53289	0.150125	66	53289	0.123853	58	53289	0.10884	266	53289	0.499165	252	53289	0.472893	1168	53289	2.19182	519	53289	0.973935	242	53289	0.454127	556	53289	1.04337	614	53289	1.15221	514	53289	0.964552	518	53289	0.972058	733	53289	1.37552
Bacillus	0.716079	0.362176	0.56391	0.0270225	0.0150874	0.861967	2.37379	18	53289	0.0337781	8	53289	0.0150125	2	53289	0.00375312	22	53289	0.0412843	22	53289	0.0412843	45	53289	0.0844452	3	53289	0.00562968	0	53289	0	1	53289	0.00187656	0	53289	0	4037	53289	7.57567	18	53289	0.0337781	13	53289	0.0243953	17	53289	0.0319015
Adlercreutzia	0.0118257	0.35467	0.28422	0.191784	0.0900545	0.0339866	0.0232445	170	53289	0.319015	67	53289	0.12573	141	53289	0.264595	95	53289	0.178273	38	53289	0.0713093	48	53289	0.0900749	14	53289	0.0262718	4	53289	0.00750624	10	53289	0.0187656	5	53289	0.0093828	22	53289	0.0412843	20	53289	0.0375312	18	53289	0.0337781	22	53289	0.0412843
Tangfeifania	0.229018	0.348571	0.249866	0.0836946	0.0740954	0.280858	0.251994	119	53289	0.223311	33	53289	0.0619265	45	53289	0.0844452	5	53289	0.0093828	21	53289	0.0394078	16	53289	0.030025	209	53289	0.392201	311	53289	0.58361	440	53289	0.825686	91	53289	0.170767	59	53289	0.110717	54	53289	0.101334	61	53289	0.11447	106	53289	0.198915
Coprococcus	0.198702	0.337781	0.104945	0.652292	0.373277	0.692659	0.294569	660	53289	1.23853	174	53289	0.326521	140	53289	0.262718	271	53289	0.508548	493	53289	0.925144	323	53289	0.606129	234	53289	0.439115	127	53289	0.238323	439	53289	0.82381	702	53289	1.31735	378	53289	0.70934	442	53289	0.829439	438	53289	0.821933	239	53289	0.448498
Streptococcus	0.338775	0.326052	0.384698	2.05408	3.95437	0.169099	0.117785	65	53289	0.121976	40	53289	0.0750624	36	53289	0.0675562	5309	53289	9.96266	23	53289	0.0431609	134	53289	0.251459	30	53289	0.0562968	88	53289	0.165137	48	53289	0.0900749	26	53289	0.0487906	239	53289	0.448498	106	53289	0.198915	90	53289	0.16889	50	53289	0.093828
Stenotrophomonas	0.298817	0.324176	0.465087	0.173019	0.0799459	0.0840282	0.0487888	55	53289	0.103211	75	53289	0.140742	128	53289	0.2402	156	53289	0.292743	47	53289	0.0881983	14	53289	0.0262718	67	53289	0.12573	90	53289	0.16889	41	53289	0.076939	5	53289	0.0093828	51	53289	0.0957046	21	53289	0.0394078	50	53289	0.093828	64	53289	0.1201
Brotonthovivens	0.0802193	0.320423	0.219992	0.797163	0.530322	0.344661	0.186996	348	53289	0.653043	162	53289	0.304003	165	53289	0.309632	528	53289	0.990824	921	53289	1.72831	334	53289	0.626771	99	53289	0.185779	49	53289	0.0919514	169	53289	0.317139	66	53289	0.123853	345	53289	0.647413	218	53289	0.40909	196	53289	0.367806	177	53289	0.332151
Desulfovibrio	0.0577635	0.311509	0.0977524	0.859464	0.356013	0.451417	0.338926	475	53289	0.891366	757	53289	1.42056	391	53289	0.733735	168	53289	0.315262	499	53289	0.936403	744	53289	1.39616	152	53289	0.285237	177	53289	0.332151	108	53289	0.202668	169	53289	0.317139	206	53289	0.386571	194	53289	0.364053	209	53289	0.392201	206	53289	0.386571
Porphyromonas	0.913536	0.311509	0.0870125	0.291617	0.411871	0.3505	0.116886	71	53289	0.133236	58	53289	0.10884	32	53289	0.0600499	23	53289	0.0431609	593	53289	1.1128	70	53289	0.131359	194	53289	0.364053	207	53289	0.388448	171	53289	0.320892	303	53289	0.568598	164	53289	0.307756	190	53289	0.356546	134	53289	0.251459	248	53289	0.465387
Beduinibacterium	0.411706	0.302126	0.113241	0.203419	0.120004	0.231651	0.0801599	229	53289	0.429732	117	53289	0.219558	77	53289	0.144495	65	53289	0.121976	54	53289	0.101334	219	53289	0.410967	154	53289	0.28899	107	53289	0.200792	112	53289	0.210175	53	53289	0.0994577	94	53289	0.176397	118	53289	0.221434	133	53289	0.249582	121	53289	0.227064
Olivibacter	0.388442	0.291336	0.235283	0.221059	0.336321	0.103211	0.0658135	26	53289	0.0487906	6	53289	0.0112594	53	53289	0.0994577	29	53289	0.0544202	475	53289	0.891366	26	53289	0.0487906	19	53289	0.0356546	20	53289	0.0375312	46	53289	0.0863218	68	53289	0.127606	26	53289	0.0487906	95	53289	0.178273	71	53289	0.133236	124	53289	0.232693
Hespellia	0.0885952	0.282891	0.136798	0.158006	0.146224	0.776687	0.63687	113	53289	0.212051	223	53289	0.418473	43	53289	0.0806921	4	53289	0.00750624	38	53289	0.0713093	204	53289	0.382818	353	53289	0.662426	52	53289	0.0975811	162	53289	0.304003	32	53289	0.0600499	617	53289	1.15784	507	53289	0.951416	646	53289	1.21226	1152	53289	2.1618
Curtanaerobium	0.0210958	0.266472	0.242298	0.105087	0.0641773	0.0162635	0.0182797	65	53289	0.121976	27	53289	0.0506671	118	53289	0.221434	45	53289	0.0844452	25	53289	0.046914	35	53289	0.0656796	1	53289	0.00187656	6	53289	0.0112594	7	53289	0.0131359	3	53289	0.00562968	5	53289	0.0093828	4	53289	0.00750624	12	53289	0.0225187	5	53289	0.0093828
Ruminobacter	0.34864	0.265533	0.183186	0.297998	0.347076	0.515845	0.314202	77	53289	0.144495	27	53289	0.0506671	2	53289	0.00375312	180	53289	0.337781	508	53289	0.953292	287	53289	0.538573	73	53289	0.136989	102	53289	0.191409	156	53289	0.292743	444	53289	0.833193	63	53289	0.118223	469	53289	0.880107	469	53289	0.880107	411	53289	0.771266
Eubacterium	0.0840568	0.255681	0.0545233	0.400833	0.214577	0.603835	0.27904	435	53289	0.816304	191	53289	0.358423	185	53289	0.347164	145	53289	0.272101	112	53289	0.210175	665	53289	1.24791	288	53289	0.540449	286	53289	0.536696	119	53289	0.223311	258	53289	0.484152	170	53289	0.319015	358	53289	0.671808	335	53289	0.628648	417	53289	0.782525
Escherichia_Shigella	0.154053	0.253336	0.216159	0.12648	0.0541491	0.102168	0.055914	114	53289	0.213928	51	53289	0.0957046	28	53289	0.0525437	64	53289	0.1201	80	53289	0.150125	84	53289	0.157631	15	53289	0.0281484	11	53289	0.0206422	85	53289	0.159508	16	53289	0.030025	55	53289	0.103211	78	53289	0.146372	76	53289	0.142619	70	53289	0.131359
Saccharibacteria_genera_incertae_sedis	0.355262	0.252866	0.222253	0.428231	0.301792	0.727063	0.67711	397	53289	0.744994	451	53289	0.846329	100	53289	0.187656	102	53289	0.191409	91	53289	0.170767	1290	53289	2.42076	727	53289	1.36426	127	53289	0.238323	167	53289	0.313386	322	53289	0.604252	209	53289	0.392201	208	53289	0.390324	216	53289	0.405337	221	53289	0.41472
Capnocytophaga	0.765925	0.251928	0.148512	0.178649	0.232055	0.235404	0.070665	66	53289	0.123853	13	53289	0.0243953	32	53289	0.0600499	25	53289	0.046914	340	53289	0.63803	91	53289	0.170767	105	53289	0.197039	80	53289	0.150125	84	53289	0.157631	124	53289	0.232693	161	53289	0.302126	128	53289	0.2402	161	53289	0.302126	195	53289	0.365929
Solobacterium	0.0296727	0.251928	0.0890563	0.241701	0.224879	0.559006	0.223958	364	53289	0.683068	112	53289	0.210175	42	53289	0.0788155	65	53289	0.121976	61	53289	0.11447	426	53289	0.799415	298	53289	0.559215	281	53289	0.527313	130	53289	0.243953	74	53289	0.138865	271	53289	0.508548	399	53289	0.748747	423	53289	0.793785	379	53289	0.711216
Acetivibrio	0.014114	0.25099	0.105191	0.183528	0.0752255	0.519807	0.233958	122	53289	0.22894	139	53289	0.260842	42	53289	0.0788155	57	53289	0.106964	129	53289	0.242076	372	53289	0.69808	260	53289	0.487906	167	53289	0.313386	135	53289	0.253336	164	53289	0.307756	180	53289	0.337781	343	53289	0.64366	333	53289	0.624894	539	53289	1.01147
Pseudomonas	0.00410425	0.235039	0.0993636	1.21564	0.558859	0.551917	0.256507	391	53289	0.733735	457	53289	0.857588	768	53289	1.4412	1181	53289	2.21622	442	53289	0.829439	201	53289	0.377189	520	53289	0.975811	436	53289	0.81818	161	53289	0.302126	89	53289	0.167014	412	53289	0.773143	248	53289	0.465387	211	53289	0.395954	369	53289	0.692451
Paramuribaculum	6.13438e-05	0.225656	0.0547006	0.0608005	0.0722083	0.0337781	0.0145895	19	53289	0.0356546	8	53289	0.0150125	15	53289	0.0281484	11	53289	0.0206422	109	53289	0.204545	1	53289	0.00187656	18	53289	0.0337781	20	53289	0.0375312	32	53289	0.0600499	13	53289	0.0243953	21	53289	0.0394078	19	53289	0.0356546	16	53289	0.030025	22	53289	0.0412843
Flexilinea	0.000390777	0.219558	0.0973824	0.294995	0.185076	0.749373	0.204827	276	53289	0.517931	47	53289	0.0881983	110	53289	0.206422	78	53289	0.146372	275	53289	0.516054	392	53289	0.735611	273	53289	0.512301	562	53289	1.05463	232	53289	0.435362	559	53289	1.049	355	53289	0.666179	456	53289	0.855711	435	53289	0.816304	330	53289	0.619265
Methanobrevibacter	0.0133763	0.213928	0.0810079	0.353919	0.175406	0.633026	0.247246	109	53289	0.204545	168	53289	0.315262	370	53289	0.694327	167	53289	0.313386	129	53289	0.242076	365	53289	0.684944	224	53289	0.420349	472	53289	0.885736	354	53289	0.664302	124	53289	0.232693	235	53289	0.440992	294	53289	0.551709	376	53289	0.705587	592	53289	1.11092
Schwartzia	0.00438864	0.213928	0.124456	0.0525437	0.0320886	0.0556713	0.0285007	25	53289	0.046914	6	53289	0.0112594	17	53289	0.0319015	36	53289	0.0675562	56	53289	0.105087	3	53289	0.00562968	11	53289	0.0206422	42	53289	0.0788155	51	53289	0.0957046	24	53289	0.0450374	29	53289	0.0544202	34	53289	0.063803	25	53289	0.046914	48	53289	0.0900749
Zea	1.34143e-05	0.21299	0.0786646	0.034904	0.0121383	0.0379482	0.0162822	14	53289	0.0262718	21	53289	0.0394078	29	53289	0.0544202	10	53289	0.0187656	19	53289	0.0356546	11	53289	0.0206422	12	53289	0.0225187	6	53289	0.0112594	29	53289	0.0544202	18	53289	0.0337781	26	53289	0.0487906	22	53289	0.0412843	24	53289	0.0450374	34	53289	0.063803
Acetobacteroides	0.417807	0.204545	0.116943	0.144495	0.0704648	0.119474	0.0959801	104	53289	0.195162	26	53289	0.0487906	67	53289	0.12573	55	53289	0.103211	133	53289	0.249582	5	53289	0.0093828	196	53289	0.367806	76	53289	0.142619	57	53289	0.106964	46	53289	0.0863218	73	53289	0.136989	28	53289	0.0525437	39	53289	0.0731858	53	53289	0.0994577
Falsiporphyromonas	0.0417693	0.197508	0.0865598	0.081818	0.0880073	0.258131	0.115892	45	53289	0.0844452	15	53289	0.0281484	10	53289	0.0187656	14	53289	0.0262718	134	53289	0.251459	18	53289	0.0337781	245	53289	0.459757	169	53289	0.317139	108	53289	0.202668	70	53289	0.131359	161	53289	0.302126	143	53289	0.268348	150	53289	0.281484	174	53289	0.326521
Acetatifactor	0.246097	0.192347	0.0824993	0.135863	0.0308487	0.182652	0.0377184	105	53289	0.197039	66	53289	0.123853	63	53289	0.118223	61	53289	0.11447	67	53289	0.12573	115	53289	0.215804	101	53289	0.189533	94	53289	0.176397	137	53289	0.257089	62	53289	0.116347	92	53289	0.172644	84	53289	0.157631	84	53289	0.157631	107	53289	0.200792
Victivallis	0.040455	0.189063	0.0747377	0.0499165	0.0310988	0.194328	0.111019	46	53289	0.0863218	19	53289	0.0356546	3	53289	0.00562968	20	53289	0.0375312	45	53289	0.0844452	23	53289	0.0431609	95	53289	0.178273	215	53289	0.40346	79	53289	0.148248	46	53289	0.0863218	184	53289	0.345287	90	53289	0.16889	69	53289	0.129483	131	53289	0.245829
Anaerovibrio	0.104259	0.181557	0.129635	0.0979564	0.0388117	0.247497	0.120621	83	53289	0.155754	29	53289	0.0544202	34	53289	0.063803	69	53289	0.129483	46	53289	0.0863218	76	53289	0.142619	40	53289	0.0750624	272	53289	0.510424	192	53289	0.360299	144	53289	0.270225	135	53289	0.253336	118	53289	0.221434	88	53289	0.165137	122	53289	0.22894
Anaerotignum	0.0173468	0.167014	0.0652493	0.0611759	0.0189002	0.123019	0.0438142	47	53289	0.0881983	21	53289	0.0394078	23	53289	0.0431609	31	53289	0.0581734	41	53289	0.076939	45	53289	0.0844452	69	53289	0.129483	48	53289	0.0900749	57	53289	0.106964	29	53289	0.0544202	56	53289	0.105087	94	53289	0.176397	96	53289	0.18015	96	53289	0.18015
Mageeibacillus	0.0402848	0.164668	0.0338139	0.153878	0.112662	0.299624	0.105247	191	53289	0.358423	72	53289	0.135112	27	53289	0.0506671	28	53289	0.0525437	92	53289	0.172644	304	53289	0.570474	145	53289	0.272101	126	53289	0.236447	99	53289	0.185779	132	53289	0.247706	150	53289	0.281484	138	53289	0.258965	151	53289	0.283361	192	53289	0.360299
Raoultibacter	0.51219	0.16373	0.111141	0.152752	0.0555233	0.118432	0.0367457	110	53289	0.206422	75	53289	0.140742	102	53289	0.191409	93	53289	0.17452	27	53289	0.0506671	100	53289	0.187656	79	53289	0.148248	33	53289	0.0619265	62	53289	0.116347	41	53289	0.076939	47	53289	0.0881983	67	53289	0.12573	63	53289	0.118223	76	53289	0.142619
Eisenbergiella	0.110331	0.156224	0.0590651	0.132485	0.0425876	0.202043	0.0542654	104	53289	0.195162	76	53289	0.142619	41	53289	0.076939	82	53289	0.153878	50	53289	0.093828	89	53289	0.167014	163	53289	0.305879	85	53289	0.159508	87	53289	0.163261	78	53289	0.146372	101	53289	0.189533	113	53289	0.212051	99	53289	0.185779	154	53289	0.28899
Mitsuokella	0.100985	0.153878	0.0387999	0.0731858	0.0307893	0.158257	0.0817686	63	53289	0.118223	47	53289	0.0881983	15	53289	0.0281484	42	53289	0.0788155	28	53289	0.0525437	21	53289	0.0394078	81	53289	0.152001	154	53289	0.28899	163	53289	0.305879	85	53289	0.159508	52	53289	0.0975811	76	53289	0.142619	59	53289	0.110717	68	53289	0.127606
Thermovenabulum	0.100549	0.15247	0.0944487	0.472518	0.303788	0.226438	0.174306	318	53289	0.596746	529	53289	0.9927	97	53289	0.182026	221	53289	0.41472	94	53289	0.176397	360	53289	0.675562	94	53289	0.176397	90	53289	0.16889	75	53289	0.140742	44	53289	0.0825686	49	53289	0.0919514	150	53289	0.281484	160	53289	0.30025	64	53289	0.1201
Collinsella	0.04217	0.149656	0.143905	0.030025	0.0291441	0.0237698	0.0203462	46	53289	0.0863218	16	53289	0.030025	7	53289	0.0131359	4	53289	0.00750624	7	53289	0.0131359	34	53289	0.063803	4	53289	0.00750624	1	53289	0.00187656	4	53289	0.00750624	3	53289	0.00562968	22	53289	0.0412843	10	53289	0.0187656	24	53289	0.0450374	12	53289	0.0225187
Anaeroplasma	0.105745	0.148717	0.125676	0.201167	0.174713	0.58507	0.464061	191	53289	0.358423	30	53289	0.0562968	27	53289	0.0506671	247	53289	0.46351	41	53289	0.076939	669	53289	1.25542	169	53289	0.317139	34	53289	0.063803	100	53289	0.187656	735	53289	1.37927	77	53289	0.144495	403	53289	0.756254	447	53289	0.838822	172	53289	0.322768
Hydrogenibacillus	0.410004	0.145433	0.0935131	0.176772	0.0639948	0.21497	0.080758	104	53289	0.195162	117	53289	0.219558	93	53289	0.17452	30	53289	0.0562968	127	53289	0.238323	223	53289	0.418473	96	53289	0.18015	100	53289	0.187656	76	53289	0.142619	71	53289	0.133236	100	53289	0.187656	128	53289	0.2402	102	53289	0.191409	135	53289	0.253336
Moryella	0.799512	0.144964	0.082594	0.117848	0.0547673	0.124061	0.0431241	118	53289	0.221434	42	53289	0.0788155	55	53289	0.103211	36	53289	0.0675562	63	53289	0.118223	66	53289	0.123853	81	53289	0.152001	58	53289	0.10884	121	53289	0.227064	35	53289	0.0656796	68	53289	0.127606	46	53289	0.0863218	59	53289	0.110717	61	53289	0.11447
Intestinimonas	0.0982889	0.143088	0.0510199	0.0863218	0.0734116	0.161593	0.0387059	107	53289	0.200792	17	53289	0.0319015	11	53289	0.0206422	17	53289	0.0319015	78	53289	0.146372	116	53289	0.217681	56	53289	0.105087	69	53289	0.129483	70	53289	0.131359	106	53289	0.198915	66	53289	0.123853	84	53289	0.157631	108	53289	0.202668	100	53289	0.187656
Anaerovorax	0.17538	0.139335	0.121957	0.0626771	0.0345328	0.149291	0.0597043	66	53289	0.123853	19	53289	0.0356546	15	53289	0.0281484	40	53289	0.0750624	27	53289	0.0506671	130	53289	0.243953	73	53289	0.136989	97	53289	0.182026	30	53289	0.0562968	39	53289	0.0731858	122	53289	0.22894	81	53289	0.152001	62	53289	0.116347	82	53289	0.153878
Laedolimicola	0.426935	0.128544	0.0387431	0.120475	0.113089	0.202877	0.134934	184	53289	0.345287	26	53289	0.0487906	37	53289	0.0694327	45	53289	0.0844452	29	53289	0.0544202	87	53289	0.163261	47	53289	0.0881983	20	53289	0.0375312	93	53289	0.17452	38	53289	0.0713093	265	53289	0.497288	148	53289	0.277731	165	53289	0.309632	110	53289	0.206422
Anthropogastromicrobium	0.866031	0.128075	0.11391	0.147498	0.0870578	0.171184	0.147662	123	53289	0.230817	49	53289	0.0919514	53	53289	0.0994577	24	53289	0.0450374	144	53289	0.270225	294	53289	0.551709	80	53289	0.150125	23	53289	0.0431609	51	53289	0.0957046	36	53289	0.0675562	32	53289	0.0600499	118	53289	0.221434	115	53289	0.215804	72	53289	0.135112
Tessaracoccus	0.051406	0.126668	0.0907225	0.0258965	0.017297	0.0596329	0.0382926	9	53289	0.016889	32	53289	0.0600499	12	53289	0.0225187	8	53289	0.0150125	8	53289	0.0150125	40	53289	0.0750624	7	53289	0.0131359	50	53289	0.093828	77	53289	0.144495	26	53289	0.0487906	14	53289	0.0262718	34	53289	0.063803	17	53289	0.0319015	21	53289	0.0394078
Campylobacter	0.297947	0.126199	0.106695	0.0502918	0.0342625	0.0831942	0.0490944	43	53289	0.0806921	11	53289	0.0206422	2	53289	0.00375312	50	53289	0.093828	28	53289	0.0525437	27	53289	0.0506671	11	53289	0.0206422	5	53289	0.0093828	27	53289	0.0506671	48	53289	0.0900749	79	53289	0.148248	74	53289	0.138865	60	53289	0.112594	68	53289	0.127606
Pararoseburia	0.556795	0.126199	0.102829	0.273978	0.193761	0.178482	0.215225	346	53289	0.64929	101	53289	0.189533	80	53289	0.150125	140	53289	0.262718	63	53289	0.118223	409	53289	0.767513	26	53289	0.0487906	28	53289	0.0525437	28	53289	0.0525437	67	53289	0.12573	118	53289	0.221434	82	53289	0.153878	62	53289	0.116347	36	53289	0.0675562
Akkermansia	0.00306386	0.123384	0.0682353	0.0221434	0.0232391	0.0225187	0.0257149	35	53289	0.0656796	13	53289	0.0243953	1	53289	0.00187656	2	53289	0.00375312	8	53289	0.0150125	2	53289	0.00375312	2	53289	0.00375312	4	53289	0.00750624	44	53289	0.0825686	2	53289	0.00375312	11	53289	0.0206422	9	53289	0.016889	6	53289	0.0112594	28	53289	0.0525437
Marinilabilia	0.121876	0.121976	0.0293428	0.0608005	0.0701502	0.132819	0.0532668	31	53289	0.0581734	12	53289	0.0225187	5	53289	0.0093828	9	53289	0.016889	105	53289	0.197039	19	53289	0.0356546	59	53289	0.110717	76	53289	0.142619	61	53289	0.11447	109	53289	0.204545	112	53289	0.210175	68	53289	0.127606	43	53289	0.0806921	90	53289	0.16889
Pedobacter	0.289794	0.120569	0.036662	0.203794	0.338665	0.342993	0.177894	35	53289	0.0656796	22	53289	0.0412843	7	53289	0.0131359	10	53289	0.0187656	469	53289	0.880107	48	53289	0.0900749	203	53289	0.380942	54	53289	0.101334	183	53289	0.34341	370	53289	0.694327	280	53289	0.525437	169	53289	0.317139	151	53289	0.283361	187	53289	0.350917
Acinetobacter	0.119979	0.117754	0.111954	0.02402	0.00952435	0.0462885	0.0399256	9	53289	0.016889	16	53289	0.030025	7	53289	0.0131359	11	53289	0.0206422	21	53289	0.0394078	52	53289	0.0975811	6	53289	0.0112594	1	53289	0.00187656	5	53289	0.0093828	1	53289	0.00187656	58	53289	0.10884	23	53289	0.0431609	39	53289	0.0731858	37	53289	0.0694327
Mogibacterium	0.11974	0.115878	0.0581185	0.0987071	0.0495582	0.208715	0.115665	84	53289	0.157631	27	53289	0.0506671	72	53289	0.135112	64	53289	0.1201	16	53289	0.030025	257	53289	0.482276	100	53289	0.187656	100	53289	0.187656	50	53289	0.093828	26	53289	0.0487906	91	53289	0.170767	105	53289	0.197039	135	53289	0.253336	137	53289	0.257089
Shuttleworthia	0.394905	0.113063	0.067169	0.0686821	0.0103874	0.101334	0.0474983	44	53289	0.0825686	32	53289	0.0600499	29	53289	0.0544202	37	53289	0.0694327	41	53289	0.076939	103	53289	0.193286	51	53289	0.0957046	17	53289	0.0319015	42	53289	0.0788155	31	53289	0.0581734	82	53289	0.153878	50	53289	0.093828	39	53289	0.0731858	71	53289	0.133236
Alkaliphilus	0.00756299	0.111186	0.0241914	0.0919514	0.0699532	0.246872	0.0937575	118	53289	0.221434	58	53289	0.10884	21	53289	0.0394078	18	53289	0.0337781	30	53289	0.0562968	133	53289	0.249582	114	53289	0.213928	95	53289	0.178273	41	53289	0.076939	83	53289	0.155754	180	53289	0.337781	166	53289	0.311509	166	53289	0.311509	206	53289	0.386571
Fannyhessea	0.00194778	0.111186	0.0293541	0.0596746	0.0245937	0.0410758	0.0211837	42	53289	0.0788155	46	53289	0.0863218	17	53289	0.0319015	15	53289	0.0281484	39	53289	0.0731858	24	53289	0.0450374	49	53289	0.0919514	19	53289	0.0356546	22	53289	0.0412843	16	53289	0.030025	24	53289	0.0450374	6	53289	0.0112594	12	53289	0.0225187	25	53289	0.046914
Sporomusa	0.502707	0.105556	0.0758601	0.0345287	0.0194512	0.188907	0.297872	37	53289	0.0694327	5	53289	0.0093828	18	53289	0.0337781	16	53289	0.030025	16	53289	0.030025	3	53289	0.00562968	13	53289	0.0243953	537	53289	1.00771	27	53289	0.0506671	0	53289	0	42	53289	0.0788155	91	53289	0.170767	100	53289	0.187656	93	53289	0.17452
Methylobacterium	0.211039	0.104618	0.0824446	0.0401584	0.0283255	0.0429524	0.0493364	38	53289	0.0713093	6	53289	0.0112594	40	53289	0.0750624	18	53289	0.0337781	5	53289	0.0093828	48	53289	0.0900749	1	53289	0.00187656	5	53289	0.0093828	13	53289	0.0243953	1	53289	0.00187656	85	53289	0.159508	9	53289	0.016889	31	53289	0.0581734	13	53289	0.0243953
Oscillibacter	0.00799926	0.104618	0.0466199	0.0840699	0.0637964	0.228523	0.083786	103	53289	0.193286	16	53289	0.030025	18	53289	0.0337781	23	53289	0.0431609	64	53289	0.1201	88	53289	0.165137	132	53289	0.247706	168	53289	0.315262	98	53289	0.183903	227	53289	0.425979	89	53289	0.167014	92	53289	0.172644	94	53289	0.176397	108	53289	0.202668
Jutongia	0.00970108	0.103211	0.0462525	0.109966	0.05565	0.2304	0.0790474	99	53289	0.185779	90	53289	0.16889	29	53289	0.0544202	40	53289	0.0750624	35	53289	0.0656796	173	53289	0.324645	174	53289	0.326521	94	53289	0.176397	164	53289	0.307756	35	53289	0.0656796	99	53289	0.185779	124	53289	0.232693	118	53289	0.221434	124	53289	0.232693
Mediterraneibacter	0.175251	0.102742	0.0178211	0.202293	0.0949725	0.149708	0.0659013	127	53289	0.238323	59	53289	0.110717	44	53289	0.0825686	183	53289	0.34341	126	53289	0.236447	162	53289	0.304003	57	53289	0.106964	26	53289	0.0487906	104	53289	0.195162	67	53289	0.12573	82	53289	0.153878	70	53289	0.131359	71	53289	0.133236	79	53289	0.148248
Dethiosulfatibacter	0.0162525	0.101334	0.043688	0.0401584	0.0197387	0.0502501	0.0199339	37	53289	0.0694327	31	53289	0.0581734	14	53289	0.0262718	14	53289	0.0262718	11	53289	0.0206422	36	53289	0.0675562	13	53289	0.0243953	11	53289	0.0206422	31	53289	0.0581734	14	53289	0.0262718	33	53289	0.0619265	33	53289	0.0619265	28	53289	0.0525437	42	53289	0.0788155
Anaerofilum	0.901336	0.0919514	0.0755068	0.0990824	0.0530028	0.113636	0.0898143	97	53289	0.182026	63	53289	0.118223	43	53289	0.0806921	10	53289	0.0187656	51	53289	0.0957046	186	53289	0.34904	46	53289	0.0863218	40	53289	0.0750624	11	53289	0.0206422	69	53289	0.129483	26	53289	0.0487906	70	53289	0.131359	57	53289	0.106964	40	53289	0.0750624
Carboxylicivirga	0.429816	0.0919514	0.0301712	0.251459	0.33233	0.126355	0.0573162	24	53289	0.0450374	74	53289	0.138865	61	53289	0.11447	25	53289	0.046914	486	53289	0.912008	35	53289	0.0656796	52	53289	0.0975811	34	53289	0.063803	25	53289	0.046914	112	53289	0.210175	98	53289	0.183903	70	53289	0.131359	79	53289	0.148248	101	53289	0.189533
Pantoea	0.333328	0.0914823	0.0395054	0.272852	0.177367	0.360717	0.351104	51	53289	0.0957046	137	53289	0.257089	155	53289	0.290867	317	53289	0.594869	67	53289	0.12573	55	53289	0.103211	531	53289	0.996453	478	53289	0.896996	321	53289	0.602376	78	53289	0.146372	135	53289	0.253336	42	53289	0.0788155	23	53289	0.0431609	67	53289	0.12573
Ruminococcoides	0.199125	0.0900749	0.0320392	0.117473	0.0889149	0.368431	0.374334	105	53289	0.197039	69	53289	0.129483	10	53289	0.0187656	7	53289	0.0131359	122	53289	0.22894	735	53289	1.37927	89	53289	0.167014	252	53289	0.472893	43	53289	0.0806921	99	53289	0.185779	73	53289	0.136989	181	53289	0.339657	156	53289	0.292743	139	53289	0.260842
Roseburia	0.803484	0.0891366	0.0486731	0.0754377	0.0234803	0.0861132	0.0236947	47	53289	0.0881983	20	53289	0.0375312	43	53289	0.0806921	57	53289	0.106964	34	53289	0.063803	65	53289	0.121976	47	53289	0.0881983	22	53289	0.0412843	36	53289	0.0675562	41	53289	0.076939	62	53289	0.116347	50	53289	0.093828	52	53289	0.0975811	38	53289	0.0713093
Staphylococcus	0.673301	0.0891366	0.0633669	0.0592993	0.0667655	0.0608839	0.0325043	100	53289	0.187656	12	53289	0.0225187	5	53289	0.0093828	8	53289	0.0150125	33	53289	0.0619265	71	53289	0.133236	31	53289	0.0581734	21	53289	0.0394078	18	53289	0.0337781	22	53289	0.0412843	20	53289	0.0375312	45	53289	0.0844452	47	53289	0.0881983	17	53289	0.0319015
Agathobacter	0.543918	0.0886675	0.0551813	0.0570474	0.0322113	0.0823601	0.041694	21	53289	0.0394078	22	53289	0.0412843	17	53289	0.0319015	64	53289	0.1201	28	53289	0.0525437	12	53289	0.0225187	28	53289	0.0525437	10	53289	0.0187656	65	53289	0.121976	78	53289	0.146372	56	53289	0.105087	48	53289	0.0900749	59	53289	0.110717	39	53289	0.0731858
Lachnoanaerobaculum	0.298835	0.0858526	0.0255714	0.0390324	0.0210777	0.0796495	0.0606858	38	53289	0.0713093	24	53289	0.0450374	10	53289	0.0187656	7	53289	0.0131359	25	53289	0.046914	8	53289	0.0150125	59	53289	0.110717	51	53289	0.0957046	121	53289	0.227064	45	53289	0.0844452	14	53289	0.0262718	17	53289	0.0319015	27	53289	0.0506671	40	53289	0.0750624
Rarimicrobium	0.104263	0.0849143	0.0653756	0.0266472	0.00825686	0.0431609	0.0238847	20	53289	0.0375312	11	53289	0.0206422	8	53289	0.0150125	14	53289	0.0262718	18	53289	0.0337781	14	53289	0.0262718	6	53289	0.0112594	22	53289	0.0412843	31	53289	0.0581734	19	53289	0.0356546	54	53289	0.101334	20	53289	0.0375312	17	53289	0.0319015	24	53289	0.0450374
Anaerobutyricum	0.0578853	0.0835069	0.0305338	0.0930774	0.0219357	0.135321	0.0413075	59	53289	0.110717	49	53289	0.0919514	39	53289	0.0731858	66	53289	0.123853	35	53289	0.0656796	119	53289	0.223311	56	53289	0.105087	57	53289	0.106964	58	53289	0.10884	75	53289	0.140742	40	53289	0.0750624	91	53289	0.170767	72	53289	0.135112	81	53289	0.152001
Holdemania	0.0345427	0.0811612	0.0371392	0.10171	0.0386116	0.180984	0.0751203	79	53289	0.148248	73	53289	0.136989	23	53289	0.0431609	41	53289	0.076939	55	53289	0.103211	73	53289	0.136989	130	53289	0.243953	54	53289	0.101334	65	53289	0.121976	38	53289	0.0713093	84	53289	0.157631	137	53289	0.257089	156	53289	0.292743	131	53289	0.245829
Pectinatus	0.503057	0.0806921	0.0586106	0.0138865	0.00810187	0.106755	0.175289	8	53289	0.0150125	5	53289	0.0093828	1	53289	0.00187656	14	53289	0.0262718	9	53289	0.016889	3	53289	0.00562968	7	53289	0.0131359	315	53289	0.591116	6	53289	0.0112594	16	53289	0.030025	12	53289	0.0225187	44	53289	0.0825686	60	53289	0.112594	49	53289	0.0919514
Cutibacterium	0.0744953	0.0797538	0.0744086	0.0063803	0.00421287	0.0206422	0.0338937	7	53289	0.0131359	5	53289	0.0093828	2	53289	0.00375312	1	53289	0.00187656	2	53289	0.00375312	60	53289	0.112594	0	53289	0	0	53289	0	0	53289	0	0	53289	0	15	53289	0.0281484	6	53289	0.0112594	10	53289	0.0187656	8	53289	0.0150125
Faecalicatena	0.0397515	0.0792847	0.0380524	0.0510424	0.0337864	0.1103	0.0334496	33	53289	0.0619265	55	53289	0.103211	9	53289	0.016889	6	53289	0.0112594	33	53289	0.0619265	48	53289	0.0900749	61	53289	0.11447	84	53289	0.157631	33	53289	0.0619265	41	53289	0.076939	85	53289	0.159508	50	53289	0.093828	51	53289	0.0957046	76	53289	0.142619
Guopingia	0.994332	0.0788155	0.0471946	0.0810674	0.0477606	0.0783985	0.0350601	66	53289	0.123853	78	53289	0.146372	29	53289	0.0544202	8	53289	0.0150125	35	53289	0.0656796	75	53289	0.140742	67	53289	0.12573	11	53289	0.0206422	25	53289	0.046914	45	53289	0.0844452	32	53289	0.0600499	34	53289	0.063803	43	53289	0.0806921	44	53289	0.0825686
Colidextribacter	0.865958	0.0783464	0.0264513	0.0683068	0.0821976	0.0863218	0.0442751	123	53289	0.230817	19	53289	0.0356546	18	53289	0.0337781	2	53289	0.00375312	20	53289	0.0375312	47	53289	0.0881983	25	53289	0.046914	38	53289	0.0713093	97	53289	0.182026	77	53289	0.144495	30	53289	0.0562968	28	53289	0.0525437	27	53289	0.0506671	45	53289	0.0844452
Stecheria	0.610304	0.0778772	0.0360597	0.147498	0.0737142	0.1299	0.123682	143	53289	0.268348	79	53289	0.148248	39	53289	0.0731858	95	53289	0.178273	37	53289	0.0694327	237	53289	0.444745	30	53289	0.0562968	21	53289	0.0394078	16	53289	0.030025	16	53289	0.030025	46	53289	0.0863218	79	53289	0.148248	89	53289	0.167014	89	53289	0.167014
Anaerostipes	0.0974336	0.076939	0.0208543	0.138115	0.0735133	0.199124	0.100128	144	53289	0.270225	89	53289	0.167014	49	53289	0.0919514	44	53289	0.0825686	42	53289	0.0788155	136	53289	0.255212	99	53289	0.185779	127	53289	0.238323	57	53289	0.106964	23	53289	0.0431609	45	53289	0.0844452	201	53289	0.377189	152	53289	0.285237	115	53289	0.215804
Sphaerochaeta	0.108767	0.076939	0.0372723	0.0435362	0.024708	0.0408673	0.0170109	42	53289	0.0788155	12	53289	0.0225187	19	53289	0.0356546	8	53289	0.0150125	35	53289	0.0656796	1	53289	0.00187656	31	53289	0.0581734	30	53289	0.0562968	20	53289	0.0375312	26	53289	0.0487906	19	53289	0.0356546	14	53289	0.0262718	28	53289	0.0525437	27	53289	0.0506671
Clostridium_sensu_stricto	0.0249557	0.0764698	0.0200526	0.0713093	0.0524363	0.164512	0.0693115	91	53289	0.170767	25	53289	0.046914	11	53289	0.0206422	24	53289	0.0450374	39	53289	0.0731858	25	53289	0.046914	64	53289	0.1201	60	53289	0.112594	75	53289	0.140742	79	53289	0.148248	104	53289	0.195162	110	53289	0.206422	110	53289	0.206422	162	53289	0.304003
Succinimonas	0.665679	0.0764698	0.0385809	0.00450374	0.00483556	0.48874	1.36247	7	53289	0.0131359	3	53289	0.00562968	2	53289	0.00375312	0	53289	0	0	53289	0	2	53289	0.00375312	2	53289	0.00375312	8	53289	0.0150125	2314	53289	4.34236	1	53289	0.00187656	0	53289	0	4	53289	0.00750624	4	53289	0.00750624	9	53289	0.016889
Lacrimispora	0.750951	0.0750624	0.0946222	0.0863218	0.0777539	0.16472	0.287772	15	53289	0.0281484	23	53289	0.0431609	53	53289	0.0994577	15	53289	0.0281484	124	53289	0.232693	519	53289	0.973935	35	53289	0.0656796	10	53289	0.0187656	6	53289	0.0112594	50	53289	0.093828	59	53289	0.110717	28	53289	0.0525437	36	53289	0.0675562	47	53289	0.0881983
Gallintestinimicrobium	0.229859	0.0741241	0.0405202	0.0506671	0.018539	0.0804836	0.0239737	42	53289	0.0788155	29	53289	0.0544202	22	53289	0.0412843	30	53289	0.0562968	12	53289	0.0225187	49	53289	0.0919514	35	53289	0.0656796	33	53289	0.0619265	22	53289	0.0412843	34	53289	0.063803	39	53289	0.0731858	52	53289	0.0975811	62	53289	0.116347	60	53289	0.112594
Sphingobacterium	0.398727	0.0727167	0.0635732	0.0367806	0.0399949	0.0881983	0.0676488	9	53289	0.016889	7	53289	0.0131359	7	53289	0.0131359	13	53289	0.0243953	62	53289	0.116347	7	53289	0.0131359	101	53289	0.189533	109	53289	0.204545	74	53289	0.138865	25	53289	0.046914	19	53289	0.0356546	14	53289	0.0262718	32	53289	0.0600499	42	53289	0.0788155
Gordonibacter	0.0267711	0.0722476	0.0620756	0.0716846	0.0389385	0.0139699	0.0123565	70	53289	0.131359	26	53289	0.0487906	47	53289	0.0881983	40	53289	0.0750624	8	53289	0.0150125	4	53289	0.00750624	12	53289	0.0225187	2	53289	0.00375312	19	53289	0.0356546	8	53289	0.0150125	1	53289	0.00187656	3	53289	0.00562968	1	53289	0.00187656	17	53289	0.0319015
Erysipelothrix	0.0320936	0.0708401	0.0361542	0.0585487	0.0313425	0.27231	0.190334	58	53289	0.10884	11	53289	0.0206422	23	53289	0.0431609	22	53289	0.0412843	42	53289	0.0788155	56	53289	0.105087	406	53289	0.761883	207	53289	0.388448	68	53289	0.127606	146	53289	0.273978	120	53289	0.225187	86	53289	0.161384	109	53289	0.204545	108	53289	0.202668
Aminipila	0.81896	0.070371	0.0203198	0.0551709	0.0319478	0.0765219	0.0728712	57	53289	0.106964	20	53289	0.0375312	21	53289	0.0394078	9	53289	0.016889	40	53289	0.0750624	149	53289	0.279607	27	53289	0.0506671	18	53289	0.0337781	24	53289	0.0450374	17	53289	0.0319015	34	53289	0.063803	33	53289	0.0619265	27	53289	0.0506671	38	53289	0.0713093
Mucilaginibacter	0.883302	0.0689636	0.0468083	0.0514177	0.0795148	0.0679732	0.0486683	11	53289	0.0206422	4	53289	0.00750624	5	53289	0.0093828	5	53289	0.0093828	112	53289	0.210175	8	53289	0.0150125	18	53289	0.0337781	21	53289	0.0394078	17	53289	0.0319015	17	53289	0.0319015	29	53289	0.0544202	78	53289	0.146372	71	53289	0.133236	67	53289	0.12573
Desulfococcus	0.0322997	0.0684944	0.0403024	0.0142619	0.00835859	0.0444119	0.0228465	16	53289	0.030025	3	53289	0.00562968	5	53289	0.0093828	7	53289	0.0131359	7	53289	0.0131359	8	53289	0.0150125	16	53289	0.030025	37	53289	0.0694327	40	53289	0.0750624	29	53289	0.0544202	12	53289	0.0225187	24	53289	0.0450374	38	53289	0.0713093	9	53289	0.016889
Natronogracilivirga	0.149662	0.0680253	0.0443753	0.0206422	0.018577	0.0323185	0.0317697	2	53289	0.00375312	9	53289	0.016889	1	53289	0.00187656	28	53289	0.0525437	15	53289	0.0281484	5	53289	0.0093828	18	53289	0.0337781	64	53289	0.1201	10	53289	0.0187656	7	53289	0.0131359	13	53289	0.0243953	11	53289	0.0206422	13	53289	0.0243953	14	53289	0.0262718
Gimesia	0.34765	0.0675562	0.0534078	0.0322768	0.00706145	0.0417013	0.0294164	10	53289	0.0187656	21	53289	0.0394078	18	53289	0.0337781	18	53289	0.0337781	19	53289	0.0356546	18	53289	0.0337781	23	53289	0.0431609	60	53289	0.112594	9	53289	0.016889	16	53289	0.030025	0	53289	0	20	53289	0.0375312	25	53289	0.046914	29	53289	0.0544202
Spartobacteria_genera_incertae_sedis	0.352208	0.0666179	0.0286291	0.0743118	0.054058	0.0448289	0.0196307	95	53289	0.178273	22	53289	0.0412843	20	53289	0.0375312	20	53289	0.0375312	41	53289	0.076939	23	53289	0.0431609	36	53289	0.0675562	24	53289	0.0450374	47	53289	0.0881983	19	53289	0.0356546	16	53289	0.030025	17	53289	0.0319015	22	53289	0.0412843	11	53289	0.0206422
Marseilla	0.128799	0.0642722	0.0386265	0.116347	0.107885	0.0352376	0.0186354	51	53289	0.0957046	20	53289	0.0375312	26	53289	0.0487906	175	53289	0.328398	38	53289	0.0713093	1	53289	0.00187656	18	53289	0.0337781	15	53289	0.0281484	21	53289	0.0394078	42	53289	0.0788155	19	53289	0.0356546	16	53289	0.030025	20	53289	0.0375312	17	53289	0.0319015
Sharpea	0.0160341	0.0642722	0.0544101	0.00975811	0.0136047	0.00583819	0.0108864	19	53289	0.0356546	6	53289	0.0112594	0	53289	0	0	53289	0	1	53289	0.00187656	0	53289	0	0	53289	0	19	53289	0.0356546	5	53289	0.0093828	0	53289	0	1	53289	0.00187656	1	53289	0.00187656	1	53289	0.00187656	1	53289	0.00187656
Carboxydocella	0.0856269	0.0623956	0.0299479	0.0326521	0.0173051	0.079858	0.0385709	17	53289	0.0319015	13	53289	0.0243953	32	53289	0.0600499	4	53289	0.00750624	21	53289	0.0394078	12	53289	0.0225187	56	53289	0.105087	46	53289	0.0863218	12	53289	0.0225187	72	53289	0.135112	69	53289	0.129483	34	53289	0.063803	34	53289	0.063803	48	53289	0.0900749
Sedimentibacter	0.0949403	0.0623956	0.0362029	0.601625	0.557801	0.23603	0.206724	201	53289	0.377189	908	53289	1.70392	152	53289	0.285237	239	53289	0.448498	103	53289	0.193286	404	53289	0.75813	65	53289	0.121976	44	53289	0.0825686	40	53289	0.0750624	53	53289	0.0994577	100	53289	0.187656	186	53289	0.34904	167	53289	0.313386	73	53289	0.136989
Hominimerdicola	0.401739	0.0614573	0.071178	0.118223	0.109241	0.0581734	0.044284	58	53289	0.10884	0	53289	0	160	53289	0.30025	9	53289	0.016889	88	53289	0.165137	43	53289	0.0806921	3	53289	0.00562968	8	53289	0.0150125	38	53289	0.0713093	58	53289	0.10884	5	53289	0.0093828	56	53289	0.105087	61	53289	0.11447	7	53289	0.0131359
Eggerthella	0.0301485	0.0609882	0.0642225	0.040909	0.0140629	0.00375312	0.00293395	30	53289	0.0562968	14	53289	0.0262718	29	53289	0.0544202	24	53289	0.0450374	12	53289	0.0225187	2	53289	0.00375312	0	53289	0	0	53289	0	4	53289	0.00750624	2	53289	0.00375312	5	53289	0.0093828	1	53289	0.00187656	2	53289	0.00375312	2	53289	0.00375312
Prevotellamassilia	0.523908	0.0609882	0.0443579	0.040909	0.0364536	0.0694327	0.0403351	17	53289	0.0319015	0	53289	0	13	53289	0.0243953	21	53289	0.0394078	58	53289	0.10884	5	53289	0.0093828	38	53289	0.0713093	61	53289	0.11447	83	53289	0.155754	25	53289	0.046914	22	53289	0.0412843	29	53289	0.0544202	35	53289	0.0656796	35	53289	0.0656796
Mobilisporobacter	0.113126	0.0595808	0.0583452	0.0379065	0.0173782	0.016889	0.00750624	34	53289	0.063803	12	53289	0.0225187	23	53289	0.0431609	24	53289	0.0450374	8	53289	0.0150125	6	53289	0.0112594	12	53289	0.0225187	8	53289	0.0150125	13	53289	0.0243953	14	53289	0.0262718	4	53289	0.00750624	2	53289	0.00375312	12	53289	0.0225187	10	53289	0.0187656
Papillibacter	0.0748073	0.0586425	0.0291131	0.0525437	0.0387318	0.101751	0.0378093	37	53289	0.0694327	18	53289	0.0337781	15	53289	0.0281484	6	53289	0.0112594	64	53289	0.1201	86	53289	0.161384	55	53289	0.103211	33	53289	0.0619265	34	53289	0.063803	93	53289	0.17452	43	53289	0.0806921	45	53289	0.0844452	46	53289	0.0863218	53	53289	0.0994577
Butyricicoccus	0.350325	0.0562968	0.0451935	0.141868	0.1333	0.0994577	0.036463	109	53289	0.204545	15	53289	0.0281484	200	53289	0.375312	16	53289	0.030025	38	53289	0.0713093	53	53289	0.0994577	76	53289	0.142619	23	53289	0.0431609	56	53289	0.105087	32	53289	0.0600499	68	53289	0.127606	59	53289	0.110717	30	53289	0.0562968	80	53289	0.150125
Brucella	0.745905	0.0558277	0.0459925	0.0330275	0.0115435	0.0583819	0.071498	17	53289	0.0319015	7	53289	0.0131359	18	53289	0.0337781	26	53289	0.0487906	20	53289	0.0375312	48	53289	0.0900749	7	53289	0.0131359	4	53289	0.00750624	8	53289	0.0150125	2	53289	0.00375312	131	53289	0.245829	23	53289	0.0431609	25	53289	0.046914	32	53289	0.0600499
Pseudoprevotella	0.399546	0.0558277	0.0510544	0.0585487	0.0639948	0.0250208	0.0243712	8	53289	0.0150125	2	53289	0.00375312	83	53289	0.155754	2	53289	0.00375312	61	53289	0.11447	3	53289	0.00562968	2	53289	0.00375312	7	53289	0.0131359	18	53289	0.0337781	47	53289	0.0881983	7	53289	0.0131359	8	53289	0.0150125	17	53289	0.0319015	11	53289	0.0206422
Lactonifactor	0.695929	0.0553585	0.0205781	0.0746871	0.0441275	0.0663051	0.0243551	74	53289	0.138865	18	53289	0.0337781	33	53289	0.0619265	60	53289	0.112594	14	53289	0.0262718	28	53289	0.0525437	20	53289	0.0375312	59	53289	0.110717	44	53289	0.0825686	16	53289	0.030025	27	53289	0.0506671	37	53289	0.0694327	46	53289	0.0863218	41	53289	0.076939
Mediterranea	0.0450049	0.0553585	0.0490335	0.0123853	0.00908534	0.0133444	0.00986834	16	53289	0.030025	6	53289	0.0112594	5	53289	0.0093828	3	53289	0.00562968	3	53289	0.00562968	1	53289	0.00187656	5	53289	0.0093828	4	53289	0.00750624	18	53289	0.0337781	8	53289	0.0150125	7	53289	0.0131359	5	53289	0.0093828	2	53289	0.00375312	14	53289	0.0262718
Fuerstiella	0.0866988	0.0548894	0.0504298	0.0195162	0.0257191	0.00959131	0.0125243	1	53289	0.00187656	10	53289	0.0187656	3	53289	0.00562968	1	53289	0.00187656	37	53289	0.0694327	2	53289	0.00375312	2	53289	0.00375312	3	53289	0.00562968	0	53289	0	3	53289	0.00562968	23	53289	0.0431609	4	53289	0.00750624	8	53289	0.0150125	1	53289	0.00187656
Mailhella	0.242728	0.0548894	0.00960306	0.13211	0.0834476	0.0865303	0.0590078	85	53289	0.159508	133	53289	0.249582	32	53289	0.0600499	9	53289	0.016889	93	53289	0.17452	133	53289	0.249582	40	53289	0.0750624	29	53289	0.0544202	28	53289	0.0525437	38	53289	0.0713093	50	53289	0.093828	32	53289	0.0600499	28	53289	0.0525437	37	53289	0.0694327
Enorma	0.0458116	0.0544202	0.0479717	0.0112594	0.00660805	0.0129274	0.0126177	6	53289	0.0112594	12	53289	0.0225187	1	53289	0.00187656	6	53289	0.0112594	5	53289	0.0093828	22	53289	0.0412843	1	53289	0.00187656	2	53289	0.00375312	0	53289	0	1	53289	0.00187656	6	53289	0.0112594	8	53289	0.0150125	12	53289	0.0225187	10	53289	0.0187656
Senegalimassilia	0.000841742	0.0544202	0.0163056	0.0161384	0.0173051	0.00979981	0.0109342	23	53289	0.0431609	3	53289	0.00562968	16	53289	0.030025	1	53289	0.00187656	0	53289	0	16	53289	0.030025	0	53289	0	3	53289	0.00562968	8	53289	0.0150125	1	53289	0.00187656	0	53289	0	0	53289	0	5	53289	0.0093828	14	53289	0.0262718
Muricoprocola	0.329099	0.0539511	0.0351667	0.0292743	0.0191593	0.0431609	0.014643	35	53289	0.0656796	10	53289	0.0187656	11	53289	0.0206422	6	53289	0.0112594	16	53289	0.030025	21	53289	0.0394078	23	53289	0.0431609	32	53289	0.0600499	30	53289	0.0562968	28	53289	0.0525437	5	53289	0.0093828	21	53289	0.0394078	18	53289	0.0337781	29	53289	0.0544202
Odoribacter	0.516668	0.0530128	0.0285637	0.0315262	0.0244789	0.0560883	0.0420398	26	53289	0.0487906	9	53289	0.016889	6	53289	0.0112594	5	53289	0.0093828	38	53289	0.0713093	2	53289	0.00375312	73	53289	0.136989	20	53289	0.0375312	66	53289	0.123853	29	53289	0.0544202	21	53289	0.0394078	13	53289	0.0243953	24	53289	0.0450374	21	53289	0.0394078
Flavobacterium	0.192611	0.0520745	0.00627667	0.087823	0.0330488	0.260842	0.270764	26	53289	0.0487906	63	53289	0.118223	46	53289	0.0863218	70	53289	0.131359	29	53289	0.0544202	42	53289	0.0788155	387	53289	0.726229	391	53289	0.733735	207	53289	0.388448	101	53289	0.189533	29	53289	0.0544202	29	53289	0.0544202	32	53289	0.0600499	33	53289	0.0619265
Bacilliculturomica	0.343633	0.0506671	0.0211893	0.0495412	0.0367844	0.0708923	0.0217007	31	53289	0.0581734	27	53289	0.0506671	10	53289	0.0187656	4	53289	0.00750624	60	53289	0.112594	38	53289	0.0713093	29	53289	0.0544202	22	53289	0.0412843	29	53289	0.0544202	49	53289	0.0919514	32	53289	0.0600499	56	53289	0.105087	54	53289	0.101334	31	53289	0.0581734
Sphingomonas	0.940582	0.050198	0.0274317	0.0450374	0.0216253	0.0512926	0.0341238	13	53289	0.0243953	14	53289	0.0262718	25	53289	0.046914	45	53289	0.0844452	23	53289	0.0431609	51	53289	0.0957046	14	53289	0.0262718	10	53289	0.0187656	33	53289	0.0619265	4	53289	0.00750624	62	53289	0.116347	15	53289	0.0281484	27	53289	0.0506671	30	53289	0.0562968
Massiliprevotella	0.142957	0.0487906	0.0221641	0.0364053	0.0181784	0.0266889	0.0108263	23	53289	0.0431609	4	53289	0.00750624	31	53289	0.0581734	13	53289	0.0243953	26	53289	0.0487906	12	53289	0.0225187	8	53289	0.0150125	13	53289	0.0243953	12	53289	0.0225187	26	53289	0.0487906	7	53289	0.0131359	21	53289	0.0394078	12	53289	0.0225187	17	53289	0.0319015
Muribaculum	0.00620576	0.0483214	0.0276872	0.0183903	0.00685908	0.0120934	0.00771756	11	53289	0.0206422	4	53289	0.00750624	8	53289	0.0150125	15	53289	0.0281484	11	53289	0.0206422	6	53289	0.0112594	2	53289	0.00375312	1	53289	0.00187656	14	53289	0.0262718	7	53289	0.0131359	12	53289	0.0225187	4	53289	0.00750624	4	53289	0.00750624	8	53289	0.0150125
Subdivision3_genera_incertae_sedis	0.426524	0.0483214	0.0285945	0.0255212	0.0189375	0.0375312	0.0227779	28	53289	0.0525437	23	53289	0.0431609	9	53289	0.016889	6	53289	0.0112594	2	53289	0.00375312	8	53289	0.0150125	42	53289	0.0788155	19	53289	0.0356546	8	53289	0.0150125	36	53289	0.0675562	19	53289	0.0356546	18	53289	0.0337781	26	53289	0.0487906	4	53289	0.00750624
Howardella	0.0080029	0.0478523	0.014566	0.0157631	0.00801447	0.0283569	0.0123671	15	53289	0.0281484	5	53289	0.0093828	8	53289	0.0150125	11	53289	0.0206422	3	53289	0.00562968	11	53289	0.0206422	17	53289	0.0319015	17	53289	0.0319015	31	53289	0.0581734	12	53289	0.0225187	9	53289	0.016889	16	53289	0.030025	16	53289	0.030025	7	53289	0.0131359
Schaedlerella	0.369649	0.0478523	0.0293878	0.0551709	0.0345124	0.0746454	0.0294563	64	53289	0.1201	20	53289	0.0375312	13	53289	0.0243953	18	53289	0.0337781	32	53289	0.0600499	64	53289	0.1201	37	53289	0.0694327	30	53289	0.0562968	17	53289	0.0319015	59	53289	0.110717	59	53289	0.110717	32	53289	0.0600499	33	53289	0.0619265	27	53289	0.0506671
SR1_genera_incertae_sedis	0.043772	0.0473831	0.027719	0.0334028	0.0224058	0.0752709	0.0264713	41	53289	0.076939	16	53289	0.030025	8	53289	0.0150125	14	53289	0.0262718	10	53289	0.0187656	23	53289	0.0431609	64	53289	0.1201	21	53289	0.0394078	27	53289	0.0506671	49	53289	0.0919514	51	53289	0.0957046	36	53289	0.0675562	37	53289	0.0694327	53	53289	0.0994577
Weissella	0.264108	0.046914	0.0409202	0.0172644	0.0127496	0.0248123	0.0190917	9	53289	0.016889	2	53289	0.00375312	6	53289	0.0112594	7	53289	0.0131359	22	53289	0.0412843	14	53289	0.0262718	12	53289	0.0225187	1	53289	0.00187656	3	53289	0.00562968	30	53289	0.0562968	5	53289	0.0093828	23	53289	0.0431609	26	53289	0.0487906	5	53289	0.0093828
Acholeplasma	0.00259801	0.0464449	0.0306166	0.0341534	0.0230565	0.0921599	0.0214042	37	53289	0.0694327	5	53289	0.0093828	13	53289	0.0243953	8	53289	0.0150125	28	53289	0.0525437	35	53289	0.0656796	64	53289	0.1201	30	53289	0.0562968	51	53289	0.0957046	62	53289	0.116347	55	53289	0.103211	59	53289	0.110717	45	53289	0.0844452	41	53289	0.076939
Cellulosilyticum	0.397024	0.0459757	0.0292677	0.0502918	0.0613426	0.0919514	0.0693397	92	53289	0.172644	8	53289	0.0150125	15	53289	0.0281484	9	53289	0.016889	10	53289	0.0187656	148	53289	0.277731	60	53289	0.112594	35	53289	0.0656796	17	53289	0.0319015	25	53289	0.046914	36	53289	0.0675562	43	53289	0.0806921	47	53289	0.0881983	30	53289	0.0562968
Jonquetella	0.0265954	0.0459757	0.0109823	0.0285237	0.0147951	0.0894494	0.0471013	26	53289	0.0487906	12	53289	0.0225187	6	53289	0.0112594	9	53289	0.016889	23	53289	0.0431609	112	53289	0.210175	32	53289	0.0600499	19	53289	0.0356546	37	53289	0.0694327	56	53289	0.105087	52	53289	0.0975811	34	53289	0.063803	39	53289	0.0731858	48	53289	0.0900749
Orenia	0.436394	0.0459757	0.0280387	0.018015	0.0181396	0.0296079	0.0334963	25	53289	0.046914	17	53289	0.0319015	3	53289	0.00562968	2	53289	0.00375312	1	53289	0.00187656	44	53289	0.0825686	4	53289	0.00750624	8	53289	0.0150125	53	53289	0.0994577	13	53289	0.0243953	5	53289	0.0093828	2	53289	0.00375312	6	53289	0.0112594	7	53289	0.0131359
Lawsonibacter	7.80493e-06	0.0445683	0.00863778	0.034904	0.0218392	0.13407	0.0298827	26	53289	0.0487906	5	53289	0.0093828	7	53289	0.0131359	19	53289	0.0356546	36	53289	0.0675562	48	53289	0.0900749	74	53289	0.138865	77	53289	0.144495	55	53289	0.103211	94	53289	0.176397	99	53289	0.185779	69	53289	0.129483	67	53289	0.12573	60	53289	0.112594
Thermicanus	0.0338546	0.0445683	0.0302113	0.143369	0.0370325	0.0890323	0.0561445	79	53289	0.148248	60	53289	0.112594	91	53289	0.170767	49	53289	0.0919514	103	53289	0.193286	123	53289	0.230817	28	53289	0.0525437	56	53289	0.105087	22	53289	0.0412843	28	53289	0.0525437	20	53289	0.0375312	53	53289	0.0994577	55	53289	0.103211	42	53289	0.0788155
Ihubacter	0.520178	0.0440992	0.0143222	0.0364053	0.0411236	0.0558798	0.0233509	62	53289	0.116347	1	53289	0.00187656	17	53289	0.0319015	10	53289	0.0187656	7	53289	0.0131359	45	53289	0.0844452	10	53289	0.0187656	34	53289	0.063803	30	53289	0.0562968	12	53289	0.0225187	25	53289	0.046914	30	53289	0.0562968	32	53289	0.0600499	50	53289	0.093828
Gp14	0.00432028	0.04363	0.0239721	0.00675562	0.00687958	0.00562968	0.0132987	7	53289	0.0131359	9	53289	0.016889	0	53289	0	1	53289	0.00187656	1	53289	0.00187656	0	53289	0	0	53289	0	0	53289	0	23	53289	0.0431609	1	53289	0.00187656	0	53289	0	1	53289	0.00187656	1	53289	0.00187656	1	53289	0.00187656
Butyricimonas	0.0570977	0.0431609	0.00351072	0.0157631	0.011904	0.0281484	0.0177366	18	53289	0.0337781	3	53289	0.00562968	4	53289	0.00750624	3	53289	0.00562968	14	53289	0.0262718	3	53289	0.00562968	10	53289	0.0187656	8	53289	0.0150125	37	53289	0.0694327	11	53289	0.0206422	23	53289	0.0431609	12	53289	0.0225187	18	53289	0.0337781	13	53289	0.0243953
Corynebacterium	0.222036	0.0431609	0.0357533	0.0123853	0.00623515	0.0208507	0.0228883	13	53289	0.0243953	4	53289	0.00750624	6	53289	0.0112594	6	53289	0.0112594	4	53289	0.00750624	33	53289	0.0619265	3	53289	0.00562968	1	53289	0.00187656	0	53289	0	0	53289	0	31	53289	0.0581734	13	53289	0.0243953	5	53289	0.0093828	14	53289	0.0262718
Caldicoprobacter	0.142873	0.0422226	0.0256787	0.030025	0.0285829	0.0145955	0.0105332	34	53289	0.063803	35	53289	0.0656796	3	53289	0.00562968	1	53289	0.00187656	7	53289	0.0131359	4	53289	0.00750624	4	53289	0.00750624	6	53289	0.0112594	23	53289	0.0431609	9	53289	0.016889	5	53289	0.0093828	6	53289	0.0112594	5	53289	0.0093828	8	53289	0.0150125
Persicobacter	0.19388	0.0422226	0.0230022	0.0517931	0.0734366	0.113219	0.0753849	18	53289	0.0337781	4	53289	0.00750624	10	53289	0.0187656	1	53289	0.00187656	105	53289	0.197039	14	53289	0.0262718	12	53289	0.0225187	47	53289	0.0881983	20	53289	0.0375312	51	53289	0.0957046	123	53289	0.230817	66	53289	0.123853	95	53289	0.178273	115	53289	0.215804
Caproicibacter	0.0936006	0.0417535	0.0246243	0.0243953	0.0179602	0.128023	0.110165	27	53289	0.0506671	14	53289	0.0262718	4	53289	0.00750624	1	53289	0.00187656	19	53289	0.0356546	153	53289	0.287114	191	53289	0.358423	19	53289	0.0356546	19	53289	0.0356546	55	53289	0.103211	12	53289	0.0225187	60	53289	0.112594	50	53289	0.093828	55	53289	0.103211
Elusimicrobium	0.308359	0.0412843	0.0323673	0.0176397	0.018713	0.0446204	0.0308449	20	53289	0.0375312	0	53289	0	3	53289	0.00562968	1	53289	0.00187656	23	53289	0.0431609	14	53289	0.0262718	13	53289	0.0243953	30	53289	0.0562968	21	53289	0.0394078	48	53289	0.0900749	56	53289	0.105087	6	53289	0.0112594	13	53289	0.0243953	13	53289	0.0243953
Kineothrix	0.0811045	0.0408152	0.0252247	0.0247706	0.00632487	0.0744369	0.0461361	17	53289	0.0319015	10	53289	0.0187656	9	53289	0.016889	13	53289	0.0243953	17	53289	0.0319015	12	53289	0.0225187	29	53289	0.0544202	14	53289	0.0262718	25	53289	0.046914	32	53289	0.0600499	53	53289	0.0994577	43	53289	0.0806921	52	53289	0.0975811	97	53289	0.182026
Parolsenella	0.00187265	0.0408152	0.0136212	0.0221434	0.0189672	0.00542117	0.00471797	31	53289	0.0581734	11	53289	0.0206422	4	53289	0.00750624	10	53289	0.0187656	3	53289	0.00562968	1	53289	0.00187656	1	53289	0.00187656	4	53289	0.00750624	2	53289	0.00375312	0	53289	0	0	53289	0	6	53289	0.0112594	5	53289	0.0093828	7	53289	0.0131359
Actinomyces	0.0400079	0.040346	0.0370234	0.00600499	0.00834173	0.00896579	0.00605029	0	53289	0	2	53289	0.00375312	1	53289	0.00187656	1	53289	0.00187656	12	53289	0.0225187	2	53289	0.00375312	6	53289	0.0112594	8	53289	0.0150125	1	53289	0.00187656	1	53289	0.00187656	8	53289	0.0150125	2	53289	0.00375312	5	53289	0.0093828	10	53289	0.0187656
Dorea	0.483262	0.0398769	0.00706831	0.030025	0.00813657	0.0444119	0.0258515	20	53289	0.0375312	10	53289	0.0187656	21	53289	0.0394078	17	53289	0.0319015	12	53289	0.0225187	9	53289	0.016889	31	53289	0.0581734	8	53289	0.0150125	54	53289	0.101334	10	53289	0.0187656	21	53289	0.0394078	28	53289	0.0525437	21	53289	0.0394078	31	53289	0.0581734
Atopobium	0.0616787	0.0389386	0.0222186	0.0255212	0.0160377	0.0129274	0.0109222	8	53289	0.0150125	30	53289	0.0562968	13	53289	0.0243953	6	53289	0.0112594	11	53289	0.0206422	5	53289	0.0093828	22	53289	0.0412843	10	53289	0.0187656	4	53289	0.00750624	2	53289	0.00375312	2	53289	0.00375312	7	53289	0.0131359	5	53289	0.0093828	5	53289	0.0093828
Moraxella	0.174087	0.0389386	0.0417798	0.00863218	0.00756233	0.0162635	0.0110134	11	53289	0.0206422	0	53289	0	1	53289	0.00187656	4	53289	0.00750624	7	53289	0.0131359	13	53289	0.0243953	1	53289	0.00187656	4	53289	0.00750624	0	53289	0	10	53289	0.0187656	19	53289	0.0356546	13	53289	0.0243953	11	53289	0.0206422	7	53289	0.0131359
Zhouia	0.479299	0.0389386	0.0421991	0.135112	0.177205	0.0961216	0.0632349	15	53289	0.0281484	1	53289	0.00187656	46	53289	0.0863218	40	53289	0.0750624	258	53289	0.484152	70	53289	0.131359	14	53289	0.0262718	27	53289	0.0506671	31	53289	0.0581734	53	53289	0.0994577	134	53289	0.251459	31	53289	0.0581734	61	53289	0.11447	40	53289	0.0750624
Caloramator	0.059906	0.0384695	0.00756465	0.0364053	0.0178263	0.0214762	0.00871747	29	53289	0.0544202	27	53289	0.0506671	3	53289	0.00562968	23	53289	0.0431609	15	53289	0.0281484	18	53289	0.0337781	15	53289	0.0281484	11	53289	0.0206422	16	53289	0.030025	12	53289	0.0225187	3	53289	0.00562968	14	53289	0.0262718	7	53289	0.0131359	7	53289	0.0131359
Hydrogeniiclostridium	0.0597497	0.0384695	0.0383778	0.0116347	0.006961	0.207047	0.191378	7	53289	0.0131359	5	53289	0.0093828	3	53289	0.00562968	3	53289	0.00562968	13	53289	0.0243953	52	53289	0.0975811	44	53289	0.0825686	205	53289	0.384695	6	53289	0.0112594	23	53289	0.0431609	27	53289	0.0506671	176	53289	0.330275	134	53289	0.251459	326	53289	0.611759
Asteroleplasma	0.516066	0.0380003	0.0360567	0.00262718	0.00191372	0.0879898	0.170496	0	53289	0	1	53289	0.00187656	1	53289	0.00187656	2	53289	0.00375312	3	53289	0.00562968	0	53289	0	302	53289	0.566721	24	53289	0.0450374	40	53289	0.0750624	17	53289	0.0319015	12	53289	0.0225187	13	53289	0.0243953	7	53289	0.0131359	7	53289	0.0131359
Picrophilus	0.00273283	0.0370621	0.0181151	0.034904	0.0312344	0.141368	0.0629573	9	53289	0.016889	2	53289	0.00375312	13	53289	0.0243953	19	53289	0.0356546	50	53289	0.093828	37	53289	0.0694327	54	53289	0.101334	78	53289	0.146372	25	53289	0.046914	97	53289	0.182026	137	53289	0.257089	59	53289	0.110717	83	53289	0.155754	108	53289	0.202668
Kiloniella	0.175876	0.0365929	0.0266874	0.0198915	0.0126497	0.0439949	0.0198026	22	53289	0.0412843	2	53289	0.00375312	11	53289	0.0206422	12	53289	0.0225187	6	53289	0.0112594	4	53289	0.00750624	31	53289	0.0581734	24	53289	0.0450374	21	53289	0.0394078	44	53289	0.0825686	19	53289	0.0356546	31	53289	0.0581734	21	53289	0.0394078	16	53289	0.030025
Breznakia	0.0349088	0.0356546	0.0328264	0.0604252	0.038245	0.201209	0.139278	67	53289	0.12573	4	53289	0.00750624	26	53289	0.0487906	36	53289	0.0675562	28	53289	0.0525437	262	53289	0.491659	87	53289	0.163261	27	53289	0.0506671	14	53289	0.0262718	54	53289	0.101334	77	53289	0.144495	134	53289	0.251459	132	53289	0.247706	178	53289	0.334028
Desulfuromonas	0.782938	0.0351855	0.038899	0.0311509	0.0176277	0.0452459	0.0394667	19	53289	0.0356546	27	53289	0.0506671	10	53289	0.0187656	2	53289	0.00375312	25	53289	0.046914	78	53289	0.146372	35	53289	0.0656796	5	53289	0.0093828	5	53289	0.0093828	15	53289	0.0281484	13	53289	0.0243953	20	53289	0.0375312	24	53289	0.0450374	22	53289	0.0412843
Poribacteria_genera_incertae_sedis	0.0758979	0.0351855	0.0209963	0.0112594	0.00759949	0.031693	0.0152823	13	53289	0.0243953	4	53289	0.00750624	8	53289	0.0150125	3	53289	0.00562968	2	53289	0.00375312	10	53289	0.0187656	17	53289	0.0319015	21	53289	0.0394078	13	53289	0.0243953	34	53289	0.063803	26	53289	0.0487906	8	53289	0.0150125	13	53289	0.0243953	10	53289	0.0187656
Faecalimonas	0.81803	0.0347164	0.014566	0.0277731	0.0286911	0.0277314	0.00819301	45	53289	0.0844452	7	53289	0.0131359	9	53289	0.016889	10	53289	0.0187656	3	53289	0.00562968	16	53289	0.030025	11	53289	0.0206422	21	53289	0.0394078	20	53289	0.0375312	10	53289	0.0187656	7	53289	0.0131359	15	53289	0.0281484	16	53289	0.030025	17	53289	0.0319015
Guggenheimella	0.466835	0.0342472	0.0200087	0.0258965	0.0265226	0.0973726	0.145151	42	53289	0.0788155	7	53289	0.0131359	5	53289	0.0093828	8	53289	0.0150125	7	53289	0.0131359	268	53289	0.502918	17	53289	0.0319015	29	53289	0.0544202	21	53289	0.0394078	28	53289	0.0525437	9	53289	0.016889	29	53289	0.0544202	53	53289	0.0994577	13	53289	0.0243953
Azospirillum	0.0707385	0.0337781	0.0196815	0.00975811	0.00480634	0.0337781	0.0190142	6	53289	0.0112594	5	53289	0.0093828	1	53289	0.00187656	9	53289	0.016889	5	53289	0.0093828	6	53289	0.0112594	6	53289	0.0112594	15	53289	0.0281484	34	53289	0.063803	16	53289	0.030025	16	53289	0.030025	11	53289	0.0206422	23	53289	0.0431609	35	53289	0.0656796
Monoglobus	0.046387	0.0328398	0.0136293	0.018015	0.0140729	0.045663	0.0187864	7	53289	0.0131359	4	53289	0.00750624	2	53289	0.00375312	12	53289	0.0225187	23	53289	0.0431609	18	53289	0.0337781	11	53289	0.0206422	9	53289	0.016889	19	53289	0.0356546	41	53289	0.076939	29	53289	0.0544202	30	53289	0.0562968	31	53289	0.0581734	31	53289	0.0581734
Phascolarctobacterium	0.0479802	0.0328398	0.0260531	0.00788155	0.00598149	0.0112594	0.00679489	5	53289	0.0093828	3	53289	0.00562968	1	53289	0.00187656	2	53289	0.00375312	10	53289	0.0187656	1	53289	0.00187656	1	53289	0.00187656	7	53289	0.0131359	4	53289	0.00750624	5	53289	0.0093828	10	53289	0.0187656	5	53289	0.0093828	9	53289	0.016889	12	53289	0.0225187
Rothia	0.185428	0.0328398	0.0409739	0.00487906	0.00404223	0.0106338	0.00996915	4	53289	0.00750624	2	53289	0.00375312	6	53289	0.0112594	0	53289	0	1	53289	0.00187656	0	53289	0	2	53289	0.00375312	8	53289	0.0150125	1	53289	0.00187656	18	53289	0.0337781	7	53289	0.0131359	8	53289	0.0150125	6	53289	0.0112594	1	53289	0.00187656
Bullifex	0.000160554	0.0323707	0.0108917	0.00675562	0.00564218	0.0110509	0.00379917	5	53289	0.0093828	7	53289	0.0131359	0	53289	0	0	53289	0	6	53289	0.0112594	5	53289	0.0093828	8	53289	0.0150125	6	53289	0.0112594	6	53289	0.0112594	9	53289	0.016889	3	53289	0.00562968	5	53289	0.0093828	3	53289	0.00562968	8	53289	0.0150125
Paenibacillus	0.133659	0.0323707	0.0336312	0.0127606	0.0119512	0.00792325	0.00498675	16	53289	0.030025	13	53289	0.0243953	1	53289	0.00187656	2	53289	0.00375312	2	53289	0.00375312	10	53289	0.0187656	1	53289	0.00187656	4	53289	0.00750624	1	53289	0.00187656	4	53289	0.00750624	6	53289	0.0112594	5	53289	0.0093828	2	53289	0.00375312	5	53289	0.0093828
Endomicrobium	0.0498469	0.0319015	0.0198153	0.00713093	0.00509098	0.0608839	0.0444701	7	53289	0.0131359	3	53289	0.00562968	1	53289	0.00187656	1	53289	0.00187656	7	53289	0.0131359	9	53289	0.016889	61	53289	0.11447	73	53289	0.136989	11	53289	0.0206422	33	53289	0.0619265	59	53289	0.110717	15	53289	0.0281484	15	53289	0.0281484	16	53289	0.030025
Desulfolutivibrio	0.418666	0.0314324	0.04222	0.0266472	0.0392627	0.00854877	0.0076667	5	53289	0.0093828	2	53289	0.00375312	4	53289	0.00750624	4	53289	0.00750624	56	53289	0.105087	7	53289	0.0131359	13	53289	0.0243953	1	53289	0.00187656	1	53289	0.00187656	5	53289	0.0093828	9	53289	0.016889	1	53289	0.00187656	1	53289	0.00187656	3	53289	0.00562968
Tenuifilum	0.01715	0.0314324	0.0163258	0.00562968	0.00692041	0.0221017	0.0100387	0	53289	0	0	53289	0	3	53289	0.00562968	2	53289	0.00375312	10	53289	0.0187656	2	53289	0.00375312	9	53289	0.016889	20	53289	0.0375312	12	53289	0.0225187	5	53289	0.0093828	13	53289	0.0243953	15	53289	0.0281484	13	53289	0.0243953	17	53289	0.0319015
Anaerocolumna	0.282582	0.0309632	0.0203198	0.0258965	0.0161602	0.0537947	0.0387014	21	53289	0.0394078	2	53289	0.00375312	5	53289	0.0093828	18	53289	0.0337781	23	53289	0.0431609	36	53289	0.0675562	12	53289	0.0225187	4	53289	0.00750624	13	53289	0.0243953	75	53289	0.140742	47	53289	0.0881983	30	53289	0.0562968	24	53289	0.0450374	17	53289	0.0319015
Caproiciproducens	0.325195	0.0309632	0.0266874	0.0123853	0.00844243	0.0433694	0.0420677	7	53289	0.0131359	12	53289	0.0225187	2	53289	0.00375312	1	53289	0.00187656	11	53289	0.0206422	5	53289	0.0093828	5	53289	0.0093828	13	53289	0.0243953	13	53289	0.0243953	2	53289	0.00375312	10	53289	0.0187656	43	53289	0.0806921	50	53289	0.093828	67	53289	0.12573
Ectobacillus	0.414971	0.0309632	0.0182181	0.0101334	0.0120217	0.0335696	0.0379608	18	53289	0.0337781	1	53289	0.00187656	4	53289	0.00750624	1	53289	0.00187656	3	53289	0.00562968	5	53289	0.0093828	70	53289	0.131359	16	53289	0.030025	19	53289	0.0356546	29	53289	0.0544202	12	53289	0.0225187	2	53289	0.00375312	4	53289	0.00750624	4	53289	0.00750624
Ercella	0.119883	0.0304941	0.0115964	0.022894	0.0152175	0.0504586	0.0273867	20	53289	0.0375312	5	53289	0.0093828	6	53289	0.0112594	6	53289	0.0112594	24	53289	0.0450374	14	53289	0.0262718	18	53289	0.0337781	64	53289	0.1201	27	53289	0.0506671	27	53289	0.0506671	13	53289	0.0243953	20	53289	0.0375312	25	53289	0.046914	34	53289	0.063803
Arabiibacter	0.0123464	0.0295558	0.0157214	0.0547955	0.0349141	0.0116764	0.00700905	4	53289	0.00750624	54	53289	0.101334	14	53289	0.0262718	29	53289	0.0544202	45	53289	0.0844452	13	53289	0.0243953	7	53289	0.0131359	2	53289	0.00375312	2	53289	0.00375312	10	53289	0.0187656	7	53289	0.0131359	9	53289	0.016889	3	53289	0.00562968	3	53289	0.00562968
Desulfosudis	0.00680749	0.0295558	0.01197	0.00750624	0.00796157	0.061718	0.0327362	1	53289	0.00187656	0	53289	0	3	53289	0.00562968	4	53289	0.00750624	12	53289	0.0225187	8	53289	0.0150125	63	53289	0.118223	9	53289	0.016889	19	53289	0.0356546	44	53289	0.0825686	26	53289	0.0487906	41	53289	0.076939	41	53289	0.076939	45	53289	0.0844452
Petrimonas	0.201569	0.0295558	0.0134259	0.0814427	0.0752835	0.381984	0.468508	81	53289	0.152001	6	53289	0.0112594	8	53289	0.0150125	20	53289	0.0375312	102	53289	0.191409	64	53289	0.1201	34	53289	0.063803	7	53289	0.0131359	61	53289	0.11447	14	53289	0.0262718	51	53289	0.0957046	470	53289	0.881983	390	53289	0.731858	741	53289	1.39053
Faecalibacterium	0.0196797	0.0290867	0.0279128	0.0183903	0.0188555	0.0977896	0.0595359	0	53289	0	0	53289	0	6	53289	0.0112594	25	53289	0.046914	18	53289	0.0337781	8	53289	0.0150125	48	53289	0.0900749	30	53289	0.0562968	75	53289	0.140742	8	53289	0.0150125	94	53289	0.176397	99	53289	0.185779	44	53289	0.0825686	63	53289	0.118223
Latescibacteria_genera_incertae_sedis	0.00134249	0.0290867	0.0151584	0.000750624	0.000919323	0.00521267	0.0078016	1	53289	0.00187656	1	53289	0.00187656	0	53289	0	0	53289	0	0	53289	0	0	53289	0	1	53289	0.00187656	13	53289	0.0243953	2	53289	0.00375312	7	53289	0.0131359	0	53289	0	1	53289	0.00187656	0	53289	0	1	53289	0.00187656
Thomasclavelia	0.0984378	0.0290867	0.0180725	0.00450374	0.00304905	0.0306505	0.024113	3	53289	0.00562968	4	53289	0.00750624	0	53289	0	1	53289	0.00187656	4	53289	0.00750624	9	53289	0.016889	43	53289	0.0806921	33	53289	0.0619265	11	53289	0.0206422	21	53289	0.0394078	5	53289	0.0093828	2	53289	0.00375312	14	53289	0.0262718	9	53289	0.016889
Chengkuizengella	3.78556e-05	0.0281484	0.00807139	0.00600499	0.00685908	0.0031276	0.00385596	6	53289	0.0112594	9	53289	0.016889	0	53289	0	1	53289	0.00187656	0	53289	0	0	53289	0	0	53289	0	1	53289	0.00187656	6	53289	0.0112594	0	53289	0	1	53289	0.00187656	3	53289	0.00562968	4	53289	0.00750624	0	53289	0
Roseimarinus	0.205063	0.0281484	0.0318186	0.00150125	0.00183865	0.0106338	0.0175815	2	53289	0.00375312	0	53289	0	0	53289	0	0	53289	0	2	53289	0.00375312	0	53289	0	0	53289	0	31	53289	0.0581734	9	53289	0.016889	4	53289	0.00750624	4	53289	0.00750624	1	53289	0.00187656	0	53289	0	2	53289	0.00375312
Ruminiclostridium	0.553634	0.0281484	0.0119424	0.0319015	0.0358614	0.0458715	0.0274818	55	53289	0.103211	10	53289	0.0187656	7	53289	0.0131359	4	53289	0.00750624	9	53289	0.016889	24	53289	0.0450374	18	53289	0.0337781	37	53289	0.0694327	8	53289	0.0150125	60	53289	0.112594	19	53289	0.0356546	22	53289	0.0412843	13	53289	0.0243953	19	53289	0.0356546
Sporobacter	0.0888957	0.0281484	0.0349312	0.0277731	0.0149843	0.0677647	0.0376191	18	53289	0.0337781	10	53289	0.0187656	10	53289	0.0187656	7	53289	0.0131359	29	53289	0.0544202	11	53289	0.0206422	29	53289	0.0544202	24	53289	0.0450374	11	53289	0.0206422	45	53289	0.0844452	24	53289	0.0450374	56	53289	0.105087	54	53289	0.101334	71	53289	0.133236
Mesosutterella	0.21781	0.0276793	0.0191085	0.0123853	0.0158611	0.0108423	0.0104212	0	53289	0	1	53289	0.00187656	3	53289	0.00562968	6	53289	0.0112594	23	53289	0.0431609	1	53289	0.00187656	2	53289	0.00375312	3	53289	0.00562968	1	53289	0.00187656	5	53289	0.0093828	0	53289	0	13	53289	0.0243953	15	53289	0.0281484	12	53289	0.0225187
Suipraeoptans	0.0120423	0.0276793	0.00743257	0.0191409	0.00598149	0.0448289	0.0166309	6	53289	0.0112594	14	53289	0.0262718	13	53289	0.0243953	11	53289	0.0206422	7	53289	0.0131359	8	53289	0.0150125	25	53289	0.046914	20	53289	0.0375312	17	53289	0.0319015	28	53289	0.0525437	21	53289	0.0394078	30	53289	0.0562968	24	53289	0.0450374	42	53289	0.0788155
Megamonas	0.281349	0.0272101	0.0219846	0.0112594	0.00721927	0.0233527	0.0128532	7	53289	0.0131359	0	53289	0	6	53289	0.0112594	12	53289	0.0225187	5	53289	0.0093828	2	53289	0.00375312	13	53289	0.0243953	19	53289	0.0356546	26	53289	0.0487906	4	53289	0.00750624	12	53289	0.0225187	14	53289	0.0262718	13	53289	0.0243953	9	53289	0.016889
Ructibacterium	0.118479	0.0272101	0.00885172	0.018015	0.0117251	0.0512926	0.0353183	19	53289	0.0356546	6	53289	0.0112594	5	53289	0.0093828	3	53289	0.00562968	15	53289	0.0281484	27	53289	0.0506671	17	53289	0.0319015	24	53289	0.0450374	32	53289	0.0600499	78	53289	0.146372	14	53289	0.0262718	17	53289	0.0319015	14	53289	0.0262718	23	53289	0.0431609
Fusicatenibacter	0.553468	0.026741	0.0146188	0.0202668	0.0108387	0.0293994	0.0142915	22	53289	0.0412843	7	53289	0.0131359	9	53289	0.016889	10	53289	0.0187656	6	53289	0.0112594	11	53289	0.0206422	7	53289	0.0131359	7	53289	0.0131359	15	53289	0.0281484	30	53289	0.0562968	9	53289	0.016889	24	53289	0.0450374	21	53289	0.0394078	17	53289	0.0319015
Pyramidobacter	0.694507	0.026741	0.0175724	0.0315262	0.0221211	0.0379482	0.0209297	12	53289	0.0225187	24	53289	0.0450374	9	53289	0.016889	3	53289	0.00562968	36	53289	0.0675562	7	53289	0.0131359	2	53289	0.00375312	16	53289	0.030025	13	53289	0.0243953	27	53289	0.0506671	33	53289	0.0619265	32	53289	0.0600499	18	53289	0.0337781	34	53289	0.063803
Catenibacillus	0.468823	0.0262718	0.0153029	0.0221434	0.0102371	0.0362802	0.0242747	20	53289	0.0375312	5	53289	0.0093828	16	53289	0.030025	10	53289	0.0187656	8	53289	0.0150125	13	53289	0.0243953	5	53289	0.0093828	5	53289	0.0093828	33	53289	0.0619265	5	53289	0.0093828	42	53289	0.0788155	26	53289	0.0487906	29	53289	0.0544202	16	53289	0.030025
Pradoshia	0.0465505	0.0253336	0.0292075	0.00225187	0.00363878	0.00104253	0.00199993	5	53289	0.0093828	0	53289	0	1	53289	0.00187656	0	53289	0	0	53289	0	0	53289	0	0	53289	0	0	53289	0	3	53289	0.00562968	0	53289	0	0	53289	0	0	53289	0	2	53289	0.00375312	0	53289	0
Anaerophaga	0.0962475	0.0248644	0.0196535	0.00713093	0.00400724	0.030859	0.0193429	4	53289	0.00750624	2	53289	0.00375312	1	53289	0.00187656	5	53289	0.0093828	7	53289	0.0131359	2	53289	0.00375312	14	53289	0.0262718	12	53289	0.0225187	28	53289	0.0525437	39	53289	0.0731858	15	53289	0.0281484	8	53289	0.0150125	16	53289	0.030025	14	53289	0.0262718
Flintibacter	0.109912	0.0248644	0.011822	0.0187656	0.0119276	0.0375312	0.0161912	14	53289	0.0262718	4	53289	0.00750624	3	53289	0.00562968	9	53289	0.016889	20	53289	0.0375312	18	53289	0.0337781	10	53289	0.0187656	10	53289	0.0187656	22	53289	0.0412843	34	53289	0.063803	29	53289	0.0544202	13	53289	0.0243953	30	53289	0.0562968	14	53289	0.0262718
Neglecta	0.107236	0.0248644	0.0153244	0.00450374	0.00280858	0.030859	0.0248657	4	53289	0.00750624	0	53289	0	2	53289	0.00375312	4	53289	0.00750624	2	53289	0.00375312	7	53289	0.0131359	13	53289	0.0243953	30	53289	0.0562968	3	53289	0.00562968	10	53289	0.0187656	1	53289	0.00187656	19	53289	0.0356546	20	53289	0.0375312	45	53289	0.0844452
Roseimaritima	0.218928	0.0248644	0.0120433	0.010884	0.0118921	0.0252293	0.0148054	8	53289	0.0150125	17	53289	0.0319015	4	53289	0.00750624	0	53289	0	0	53289	0	10	53289	0.0187656	9	53289	0.016889	17	53289	0.0319015	7	53289	0.0131359	4	53289	0.00750624	6	53289	0.0112594	16	53289	0.030025	24	53289	0.0450374	28	53289	0.0525437
Veillonella	0.66046	0.0248644	0.0189233	0.0157631	0.00783674	0.0195996	0.012914	13	53289	0.0243953	2	53289	0.00375312	7	53289	0.0131359	7	53289	0.0131359	13	53289	0.0243953	2	53289	0.00375312	6	53289	0.0112594	7	53289	0.0131359	7	53289	0.0131359	2	53289	0.00375312	20	53289	0.0375312	21	53289	0.0394078	16	53289	0.030025	13	53289	0.0243953
Velocimicrobium	0.586074	0.0248644	0.00719178	0.0270225	0.010455	0.0306505	0.0086222	13	53289	0.0243953	23	53289	0.0431609	18	53289	0.0337781	7	53289	0.0131359	11	53289	0.0206422	22	53289	0.0412843	17	53289	0.0319015	10	53289	0.0187656	10	53289	0.0187656	14	53289	0.0262718	23	53289	0.0431609	13	53289	0.0243953	18	53289	0.0337781	20	53289	0.0375312
Anaerobranca	0.0732566	0.0239261	0.030153	0.0127606	0.00654379	0.0834027	0.0694193	7	53289	0.0131359	4	53289	0.00750624	3	53289	0.00562968	7	53289	0.0131359	13	53289	0.0243953	28	53289	0.0525437	13	53289	0.0243953	36	53289	0.0675562	2	53289	0.00375312	14	53289	0.0262718	45	53289	0.0844452	68	53289	0.127606	64	53289	0.1201	130	53289	0.243953
Huintestinicola	0.974685	0.0239261	0.0105635	0.0213928	0.0181008	0.0221017	0.0160157	27	53289	0.0506671	5	53289	0.0093828	6	53289	0.0112594	1	53289	0.00187656	18	53289	0.0337781	8	53289	0.0150125	4	53289	0.00750624	4	53289	0.00750624	12	53289	0.0225187	34	53289	0.063803	9	53289	0.016889	15	53289	0.0281484	11	53289	0.0206422	9	53289	0.016889
Xiphinematobacter	0.228735	0.0239261	0.00951094	0.0439115	0.0335605	0.0218932	0.0135898	6	53289	0.0112594	13	53289	0.0243953	42	53289	0.0788155	8	53289	0.0150125	48	53289	0.0900749	3	53289	0.00562968	29	53289	0.0544202	5	53289	0.0093828	15	53289	0.0281484	15	53289	0.0281484	12	53289	0.0225187	8	53289	0.0150125	10	53289	0.0187656	8	53289	0.0150125
Elizabethkingia	0.0267321	0.023457	0.0257814	0	0	0.00062552	0.000884619	0	53289	0	0	53289	0	0	53289	0	0	53289	0	0	53289	0	0	53289	0	0	53289	0	1	53289	0.00187656	0	53289	0	1	53289	0.00187656	0	53289	0	0	53289	0	1	53289	0.00187656	0	53289	0
Methylorubrum	0.153291	0.023457	0.025054	0.0296496	0.0158077	0.0110509	0.00758116	15	53289	0.0281484	11	53289	0.0206422	29	53289	0.0544202	20	53289	0.0375312	4	53289	0.00750624	4	53289	0.00750624	1	53289	0.00187656	5	53289	0.0093828	11	53289	0.0206422	0	53289	0	12	53289	0.0225187	10	53289	0.0187656	4	53289	0.00750624	6	53289	0.0112594
Gp20	0.122749	0.0229879	0.0177717	0.00375312	0.00335689	0.0145955	0.0120249	1	53289	0.00187656	3	53289	0.00562968	5	53289	0.0093828	0	53289	0	1	53289	0.00187656	22	53289	0.0412843	1	53289	0.00187656	9	53289	0.016889	0	53289	0	9	53289	0.016889	5	53289	0.0093828	13	53289	0.0243953	8	53289	0.0150125	3	53289	0.00562968
Natranaerovirga	0.789045	0.0229879	0.00843148	0.0334028	0.0302912	0.032527	0.02264	38	53289	0.0713093	37	53289	0.0694327	3	53289	0.00562968	7	53289	0.0131359	4	53289	0.00750624	14	53289	0.0262718	11	53289	0.0206422	38	53289	0.0713093	23	53289	0.0431609	38	53289	0.0713093	4	53289	0.00750624	8	53289	0.0150125	10	53289	0.0187656	10	53289	0.0187656
Gp6	0.0216236	0.0225187	0.0198153	0.00337781	0.0030025	0.00354461	0.0028589	0	53289	0	3	53289	0.00562968	2	53289	0.00375312	4	53289	0.00750624	0	53289	0	1	53289	0.00187656	1	53289	0.00187656	2	53289	0.00375312	2	53289	0.00375312	0	53289	0	4	53289	0.00750624	5	53289	0.0093828	1	53289	0.00187656	1	53289	0.00187656
Gp10	0.154933	0.0220496	0.00584075	0.0356546	0.0379789	0.00959131	0.00742471	20	53289	0.0375312	14	53289	0.0262718	2	53289	0.00375312	2	53289	0.00375312	57	53289	0.106964	1	53289	0.00187656	2	53289	0.00375312	5	53289	0.0093828	6	53289	0.0112594	15	53289	0.0281484	3	53289	0.00562968	6	53289	0.0112594	6	53289	0.0112594	2	53289	0.00375312
Micrococcus	0.11276	0.0215804	0.0245571	0.00225187	0.00363878	0.00458715	0.00745976	5	53289	0.0093828	0	53289	0	0	53289	0	0	53289	0	1	53289	0.00187656	13	53289	0.0243953	0	53289	0	0	53289	0	0	53289	0	0	53289	0	4	53289	0.00750624	3	53289	0.00562968	1	53289	0.00187656	1	53289	0.00187656
Pleomorphochaeta	0.00987008	0.0215804	0.0152741	0.0030025	0.00225187	0.00542117	0.00369475	3	53289	0.00562968	1	53289	0.00187656	0	53289	0	1	53289	0.00187656	3	53289	0.00562968	3	53289	0.00562968	5	53289	0.0093828	5	53289	0.0093828	0	53289	0	3	53289	0.00562968	5	53289	0.0093828	0	53289	0	4	53289	0.00750624	1	53289	0.00187656
Agathobaculum	0.0786486	0.0211113	0.00832641	0.02402	0.0284198	0.0544202	0.0277494	42	53289	0.0788155	2	53289	0.00375312	5	53289	0.0093828	2	53289	0.00375312	13	53289	0.0243953	32	53289	0.0600499	43	53289	0.0806921	28	53289	0.0525437	27	53289	0.0506671	63	53289	0.118223	14	53289	0.0262718	21	53289	0.0394078	17	53289	0.0319015	16	53289	0.030025
Thermophilibacter	0.425035	0.0211113	0.0175724	0.0157631	0.00774635	0.0110509	0.00978872	12	53289	0.0225187	8	53289	0.0150125	14	53289	0.0262718	3	53289	0.00562968	5	53289	0.0093828	3	53289	0.00562968	7	53289	0.0131359	2	53289	0.00375312	5	53289	0.0093828	2	53289	0.00375312	20	53289	0.0375312	4	53289	0.00750624	5	53289	0.0093828	5	53289	0.0093828
Agrobacterium	0.697909	0.0206422	0.0127274	0.0206422	0.0122768	0.0364887	0.0489915	2	53289	0.00375312	7	53289	0.0131359	9	53289	0.016889	18	53289	0.0337781	19	53289	0.0356546	5	53289	0.0093828	41	53289	0.076939	22	53289	0.0412843	85	53289	0.159508	3	53289	0.00562968	8	53289	0.0150125	3	53289	0.00562968	2	53289	0.00375312	6	53289	0.0112594
Ellagibacter	0.0144864	0.0206422	0.0134669	0.0116347	0.00808447	0.00333611	0.0030359	6	53289	0.0112594	1	53289	0.00187656	6	53289	0.0112594	14	53289	0.0262718	4	53289	0.00750624	5	53289	0.0093828	0	53289	0	1	53289	0.00187656	2	53289	0.00375312	1	53289	0.00187656	1	53289	0.00187656	0	53289	0	2	53289	0.00375312	4	53289	0.00750624
Thermovirga	0.26946	0.0206422	0.017852	0.0142619	0.0141229	0.0277314	0.00980203	4	53289	0.00750624	8	53289	0.0150125	2	53289	0.00375312	2	53289	0.00375312	22	53289	0.0412843	18	53289	0.0337781	10	53289	0.0187656	21	53289	0.0394078	4	53289	0.00750624	19	53289	0.0356546	16	53289	0.030025	13	53289	0.0243953	12	53289	0.0225187	20	53289	0.0375312
Lysinibacillus	0.613834	0.020173	0.0254333	0.0161384	0.0175074	0.0100083	0.00829846	21	53289	0.0394078	19	53289	0.0356546	1	53289	0.00187656	1	53289	0.00187656	1	53289	0.00187656	2	53289	0.00375312	1	53289	0.00187656	1	53289	0.00187656	11	53289	0.0206422	0	53289	0	5	53289	0.0093828	10	53289	0.0187656	12	53289	0.0225187	6	53289	0.0112594
Geoalkalibacter	0.0987563	0.0197039	0.00823337	0.0101334	0.00588654	0.0120934	0.00452032	3	53289	0.00562968	5	53289	0.0093828	6	53289	0.0112594	11	53289	0.0206422	2	53289	0.00375312	7	53289	0.0131359	4	53289	0.00750624	10	53289	0.0187656	8	53289	0.0150125	4	53289	0.00750624	10	53289	0.0187656	3	53289	0.00562968	6	53289	0.0112594	6	53289	0.0112594
Achromobacter	0.437452	0.0192347	0.00932397	0.034904	0.0149467	0.0262718	0.0192188	23	53289	0.0431609	7	53289	0.0131359	20	53289	0.0375312	30	53289	0.0562968	13	53289	0.0243953	36	53289	0.0675562	12	53289	0.0225187	17	53289	0.0319015	5	53289	0.0093828	1	53289	0.00187656	18	53289	0.0337781	6	53289	0.0112594	8	53289	0.0150125	23	53289	0.0431609
Brassicibacter	0.29542	0.0192347	0.0175222	0.0491659	0.0538203	0.118849	0.137881	80	53289	0.150125	2	53289	0.00375312	12	53289	0.0225187	6	53289	0.0112594	31	53289	0.0581734	266	53289	0.499165	75	53289	0.140742	24	53289	0.0450374	31	53289	0.0581734	18	53289	0.0337781	50	53289	0.093828	45	53289	0.0844452	36	53289	0.0675562	25	53289	0.046914
Gp3	0.168383	0.0192347	0.0108917	0.00750624	0.00942026	0.00917429	0.00693422	14	53289	0.0262718	1	53289	0.00187656	1	53289	0.00187656	2	53289	0.00375312	2	53289	0.00375312	0	53289	0	1	53289	0.00187656	3	53289	0.00562968	12	53289	0.0225187	4	53289	0.00750624	4	53289	0.00750624	4	53289	0.00750624	6	53289	0.0112594	10	53289	0.0187656
Stieleria	0.0438339	0.0192347	0.00243772	0.01201	0.0106552	0.00667221	0.00546112	9	53289	0.016889	16	53289	0.030025	5	53289	0.0093828	2	53289	0.00375312	0	53289	0	7	53289	0.0131359	3	53289	0.00562968	3	53289	0.00562968	0	53289	0	0	53289	0	1	53289	0.00187656	3	53289	0.00562968	7	53289	0.0131359	8	53289	0.0150125
Alterileibacterium	0.168542	0.0187656	0.00714573	0.0150125	0.0118089	0.0277314	0.0118611	17	53289	0.0319015	14	53289	0.0262718	2	53289	0.00375312	5	53289	0.0093828	2	53289	0.00375312	24	53289	0.0450374	6	53289	0.0112594	20	53289	0.0375312	25	53289	0.046914	13	53289	0.0243953	11	53289	0.0206422	14	53289	0.0262718	11	53289	0.0206422	9	53289	0.016889
Hornefia	0.204952	0.0187656	0.00909696	0.0161384	0.00677643	0.0102168	0.00719272	13	53289	0.0243953	11	53289	0.0206422	3	53289	0.00562968	10	53289	0.0187656	6	53289	0.0112594	14	53289	0.0262718	2	53289	0.00375312	7	53289	0.0131359	2	53289	0.00375312	2	53289	0.00375312	2	53289	0.00375312	8	53289	0.0150125	7	53289	0.0131359	5	53289	0.0093828
Hymenobacter	0.542414	0.0187656	0.0108614	0.0923267	0.159476	0.0711008	0.0481077	5	53289	0.0093828	14	53289	0.0262718	4	53289	0.00750624	4	53289	0.00750624	219	53289	0.410967	17	53289	0.0319015	69	53289	0.129483	22	53289	0.0412843	40	53289	0.0750624	78	53289	0.146372	70	53289	0.131359	11	53289	0.0206422	20	53289	0.0375312	14	53289	0.0262718
Massilia	0.00573422	0.0187656	0.0154745	0	0	0.00145955	0.00230303	0	53289	0	0	53289	0	0	53289	0	0	53289	0	0	53289	0	0	53289	0	0	53289	0	0	53289	0	0	53289	0	0	53289	0	1	53289	0.00187656	1	53289	0.00187656	1	53289	0.00187656	4	53289	0.00750624
Zongyangia	0.0812754	0.0187656	0.00909696	0.018015	0.0152268	0.0673476	0.0534331	15	53289	0.0281484	2	53289	0.00375312	4	53289	0.00750624	4	53289	0.00750624	23	53289	0.0431609	32	53289	0.0600499	27	53289	0.0506671	3	53289	0.00562968	11	53289	0.0206422	22	53289	0.0412843	8	53289	0.0150125	67	53289	0.12573	65	53289	0.121976	88	53289	0.165137
Catonella	0.0376268	0.0182965	0.0061348	0.010884	0.00480634	0.0256463	0.0107254	9	53289	0.016889	8	53289	0.0150125	6	53289	0.0112594	2	53289	0.00375312	4	53289	0.00750624	12	53289	0.0225187	12	53289	0.0225187	15	53289	0.0281484	25	53289	0.046914	18	53289	0.0337781	8	53289	0.0150125	12	53289	0.0225187	17	53289	0.0319015	4	53289	0.00750624
Emticicia	0.278689	0.0182965	0.00800293	0.00825686	0.00538674	0.0137614	0.00960942	9	53289	0.016889	6	53289	0.0112594	4	53289	0.00750624	2	53289	0.00375312	1	53289	0.00187656	1	53289	0.00187656	5	53289	0.0093828	11	53289	0.0206422	16	53289	0.030025	15	53289	0.0281484	6	53289	0.0112594	4	53289	0.00750624	2	53289	0.00375312	6	53289	0.0112594
Enterobacter	0.334395	0.0182965	0.0120433	0.0123853	0.00667169	0.0264803	0.0195908	0	53289	0	8	53289	0.0150125	10	53289	0.0187656	6	53289	0.0112594	9	53289	0.016889	7	53289	0.0131359	35	53289	0.0656796	22	53289	0.0412843	18	53289	0.0337781	6	53289	0.0112594	10	53289	0.0187656	5	53289	0.0093828	1	53289	0.00187656	23	53289	0.0431609
Amedibacillus	0.202179	0.0178273	0.0094296	0.0570474	0.0408142	0.103836	0.0965086	70	53289	0.131359	37	53289	0.0694327	11	53289	0.0206422	20	53289	0.0375312	14	53289	0.0262718	181	53289	0.339657	26	53289	0.0487906	22	53289	0.0412843	1	53289	0.00187656	8	53289	0.0150125	56	53289	0.105087	55	53289	0.103211	67	53289	0.12573	82	53289	0.153878
Enterococcus	0.389309	0.0178273	0.0150418	0.0138865	0.0249688	0.211634	0.377994	1	53289	0.00187656	0	53289	0	1	53289	0.00187656	34	53289	0.063803	1	53289	0.00187656	15	53289	0.0281484	1	53289	0.00187656	0	53289	0	4	53289	0.00750624	0	53289	0	9	53289	0.016889	485	53289	0.910132	494	53289	0.927021	7	53289	0.0131359
Flavisolibacter	0.0699766	0.0178273	0.0239031	0	0	0.000208507	0.000589746	0	53289	0	0	53289	0	0	53289	0	0	53289	0	0	53289	0	0	53289	0	0	53289	0	0	53289	0	0	53289	0	0	53289	0	1	53289	0.00187656	0	53289	0	0	53289	0	0	53289	0
Thermomicrobium	0.0743465	0.0178273	0.0222236	0.00112594	0.000919323	0.00166805	0.00186494	0	53289	0	0	53289	0	1	53289	0.00187656	1	53289	0.00187656	1	53289	0.00187656	0	53289	0	0	53289	0	0	53289	0	3	53289	0.00562968	0	53289	0	2	53289	0.00375312	1	53289	0.00187656	1	53289	0.00187656	1	53289	0.00187656
Bifidobacterium	0.0238597	0.016889	0.0143529	0.0116347	0.00382745	0.0663051	0.0450809	7	53289	0.0131359	5	53289	0.0093828	3	53289	0.00562968	9	53289	0.016889	7	53289	0.0131359	4	53289	0.00750624	20	53289	0.0375312	16	53289	0.030025	64	53289	0.1201	7	53289	0.0131359	29	53289	0.0544202	68	53289	0.127606	48	53289	0.0900749	62	53289	0.116347
Gp4	0.156733	0.016889	0.0153029	0.00713093	0.0046575	0.00604669	0.00449137	2	53289	0.00375312	0	53289	0	5	53289	0.0093828	5	53289	0.0093828	7	53289	0.0131359	5	53289	0.0093828	3	53289	0.00562968	8	53289	0.0150125	1	53289	0.00187656	5	53289	0.0093828	0	53289	0	4	53289	0.00750624	2	53289	0.00375312	1	53289	0.00187656
Lentihominibacter	0.586211	0.016889	0.00578395	0.0187656	0.016993	0.0246038	0.0117506	28	53289	0.0525437	7	53289	0.0131359	4	53289	0.00750624	5	53289	0.0093828	6	53289	0.0112594	21	53289	0.0394078	24	53289	0.0450374	14	53289	0.0262718	6	53289	0.0112594	11	53289	0.0206422	18	53289	0.0337781	10	53289	0.0187656	5	53289	0.0093828	9	53289	0.016889
Butyribacter	0.00226575	0.0164199	0.00406287	0.00187656	0.00118684	0.00688072	0.0058679	2	53289	0.00375312	0	53289	0	1	53289	0.00187656	1	53289	0.00187656	1	53289	0.00187656	3	53289	0.00562968	2	53289	0.00375312	0	53289	0	6	53289	0.0112594	11	53289	0.0206422	1	53289	0.00187656	5	53289	0.0093828	2	53289	0.00375312	3	53289	0.00562968
Caldilinea	0.000405645	0.0164199	0.00811219	0.00187656	0.00237368	0.00229357	0.00246708	3	53289	0.00562968	2	53289	0.00375312	0	53289	0	0	53289	0	0	53289	0	0	53289	0	1	53289	0.00187656	0	53289	0	3	53289	0.00562968	4	53289	0.00750624	1	53289	0.00187656	0	53289	0	1	53289	0.00187656	1	53289	0.00187656
Lentimicrobium	0.0918792	0.0164199	0.00155596	0.010884	0.0134485	0.0291909	0.0159259	2	53289	0.00375312	4	53289	0.00750624	2	53289	0.00375312	1	53289	0.00187656	20	53289	0.0375312	4	53289	0.00750624	18	53289	0.0337781	14	53289	0.0262718	16	53289	0.030025	37	53289	0.0694327	15	53289	0.0281484	12	53289	0.0225187	10	53289	0.0187656	14	53289	0.0262718
Phosphitispora	0.00324634	0.0164199	0.00360353	0.00412843	0.0046575	0.00396163	0.00534038	0	53289	0	2	53289	0.00375312	1	53289	0.00187656	1	53289	0.00187656	7	53289	0.0131359	0	53289	0	1	53289	0.00187656	5	53289	0.0093828	9	53289	0.016889	2	53289	0.00375312	1	53289	0.00187656	1	53289	0.00187656	0	53289	0	0	53289	0
Anaerobiospirillum	0.402265	0.0159508	0.0265551	0.000375312	0.000750624	0.00542117	0.0128024	0	53289	0	1	53289	0.00187656	0	53289	0	0	53289	0	0	53289	0	0	53289	0	0	53289	0	3	53289	0.00562968	22	53289	0.0412843	0	53289	0	1	53289	0.00187656	0	53289	0	0	53289	0	0	53289	0
Anoxynatronum	0.675418	0.0159508	0.00720707	0.0127606	0.00850891	0.0202251	0.0179945	10	53289	0.0187656	13	53289	0.0243953	7	53289	0.0131359	4	53289	0.00750624	0	53289	0	32	53289	0.0600499	10	53289	0.0187656	1	53289	0.00187656	3	53289	0.00562968	5	53289	0.0093828	22	53289	0.0412843	13	53289	0.0243953	6	53289	0.0112594	5	53289	0.0093828
Parcubacteria_genera_incertae_sedis	0.0311708	0.0159508	0.00708386	0.00375312	0.00237368	0.00562968	0.00690909	3	53289	0.00562968	0	53289	0	1	53289	0.00187656	3	53289	0.00562968	3	53289	0.00562968	0	53289	0	0	53289	0	9	53289	0.016889	10	53289	0.0187656	0	53289	0	2	53289	0.00375312	4	53289	0.00750624	1	53289	0.00187656	1	53289	0.00187656
Rhodothermus	0.0709546	0.0150125	0.00890131	0.0105087	0.00538674	0.00542117	0.00446224	9	53289	0.016889	1	53289	0.00187656	8	53289	0.0150125	6	53289	0.0112594	4	53289	0.00750624	0	53289	0	0	53289	0	2	53289	0.00375312	8	53289	0.0150125	2	53289	0.00375312	3	53289	0.00562968	2	53289	0.00375312	5	53289	0.0093828	4	53289	0.00750624
Thermoclostridium	0.156641	0.0150125	0.00478431	0.0277731	0.0175797	0.0131359	0.0102402	17	53289	0.0319015	32	53289	0.0600499	11	53289	0.0206422	6	53289	0.0112594	8	53289	0.0150125	8	53289	0.0150125	7	53289	0.0131359	6	53289	0.0112594	21	53289	0.0394078	8	53289	0.0150125	1	53289	0.00187656	5	53289	0.0093828	5	53289	0.0093828	2	53289	0.00375312
Desulfobulbus	0.34446	0.0145433	0.00873911	0.00412843	0.00322856	0.00813176	0.0117024	3	53289	0.00562968	0	53289	0	2	53289	0.00375312	5	53289	0.0093828	1	53289	0.00187656	0	53289	0	2	53289	0.00375312	1	53289	0.00187656	20	53289	0.0375312	10	53289	0.0187656	3	53289	0.00562968	2	53289	0.00375312	1	53289	0.00187656	0	53289	0
Dialister	0.154127	0.0145433	0.0132941	0.0116347	0.00480634	0.0596329	0.0613825	3	53289	0.00562968	4	53289	0.00750624	8	53289	0.0150125	6	53289	0.0112594	10	53289	0.0187656	2	53289	0.00375312	21	53289	0.0394078	23	53289	0.0431609	118	53289	0.221434	7	53289	0.0131359	35	53289	0.0656796	43	53289	0.0806921	16	53289	0.030025	21	53289	0.0394078
Fodinicurvata	0.0686964	0.0145433	0.011822	0.00412843	0.00400724	0.0212677	0.0131805	6	53289	0.0112594	3	53289	0.00562968	1	53289	0.00187656	1	53289	0.00187656	0	53289	0	2	53289	0.00375312	14	53289	0.0262718	15	53289	0.0281484	28	53289	0.0525437	10	53289	0.0187656	11	53289	0.0206422	8	53289	0.0150125	5	53289	0.0093828	9	53289	0.016889
Methanomassiliicoccus	0.0885163	0.0145433	0.010051	0.0123853	0.00876978	0.0373227	0.0258582	1	53289	0.00187656	6	53289	0.0112594	4	53289	0.00750624	7	53289	0.0131359	15	53289	0.0281484	15	53289	0.0281484	11	53289	0.0206422	12	53289	0.0225187	6	53289	0.0112594	34	53289	0.063803	7	53289	0.0131359	19	53289	0.0356546	24	53289	0.0450374	51	53289	0.0957046
Pseudobacteroides	0.479491	0.0145433	0.00843148	0.016889	0.0198951	0.0233527	0.00594153	10	53289	0.0187656	5	53289	0.0093828	1	53289	0.00187656	0	53289	0	29	53289	0.0544202	12	53289	0.0225187	10	53289	0.0187656	8	53289	0.0150125	13	53289	0.0243953	20	53289	0.0375312	13	53289	0.0243953	14	53289	0.0262718	11	53289	0.0206422	11	53289	0.0206422
Aminicella	0.193787	0.0140742	0.00600792	0.00675562	0.00304905	0.0102168	0.00574056	4	53289	0.00750624	3	53289	0.00562968	4	53289	0.00750624	1	53289	0.00187656	6	53289	0.0112594	1	53289	0.00187656	6	53289	0.0112594	6	53289	0.0112594	9	53289	0.016889	2	53289	0.00375312	8	53289	0.0150125	10	53289	0.0187656	5	53289	0.0093828	2	53289	0.00375312
Gracilibacter	0.1694	0.0140742	0.00885172	0.0502918	0.0469875	0.0235613	0.0127616	23	53289	0.0431609	76	53289	0.142619	12	53289	0.0225187	14	53289	0.0262718	9	53289	0.016889	29	53289	0.0544202	11	53289	0.0206422	8	53289	0.0150125	4	53289	0.00750624	16	53289	0.030025	10	53289	0.0187656	10	53289	0.0187656	16	53289	0.030025	9	53289	0.016889
Herbinix	0.87468	0.0140742	0.0046914	0.0161384	0.00756233	0.0170975	0.0107051	14	53289	0.0262718	10	53289	0.0187656	3	53289	0.00562968	5	53289	0.0093828	11	53289	0.0206422	4	53289	0.00750624	17	53289	0.0319015	4	53289	0.00750624	18	53289	0.0337781	14	53289	0.0262718	1	53289	0.00187656	9	53289	0.016889	9	53289	0.016889	6	53289	0.0112594
Paracoccus	0.199643	0.0140742	0.0133024	0.00262718	0.00280858	0.00542117	0.00793422	2	53289	0.00375312	0	53289	0	4	53289	0.00750624	0	53289	0	1	53289	0.00187656	14	53289	0.0262718	0	53289	0	0	53289	0	4	53289	0.00750624	0	53289	0	4	53289	0.00750624	2	53289	0.00375312	0	53289	0	2	53289	0.00375312
Sunxiuqinia	0.0358767	0.0140742	0.00629417	0.00187656	0.00167845	0.00875728	0.0069655	2	53289	0.00375312	1	53289	0.00187656	0	53289	0	0	53289	0	2	53289	0.00375312	0	53289	0	6	53289	0.0112594	5	53289	0.0093828	12	53289	0.0225187	9	53289	0.016889	2	53289	0.00375312	2	53289	0.00375312	5	53289	0.0093828	1	53289	0.00187656
Taibaiella	0.0234415	0.0140742	0.01584	0.0063803	0.00327189	0.0302335	0.0150501	4	53289	0.00750624	2	53289	0.00375312	1	53289	0.00187656	4	53289	0.00750624	6	53289	0.0112594	3	53289	0.00562968	17	53289	0.0319015	28	53289	0.0525437	24	53289	0.0450374	12	53289	0.0225187	25	53289	0.046914	10	53289	0.0187656	18	53289	0.0337781	8	53289	0.0150125
Hahella	0.0156318	0.0136051	0.0127534	0.00225187	0.00275797	0.000208507	0.000589746	4	53289	0.00750624	0	53289	0	1	53289	0.00187656	0	53289	0	1	53289	0.00187656	0	53289	0	0	53289	0	0	53289	0	0	53289	0	0	53289	0	0	53289	0	0	53289	0	0	53289	0	1	53289	0.00187656
Oryzomonas	0.539843	0.0136051	0.00951094	0.0101334	0.00953913	0.0158465	0.00674351	15	53289	0.0281484	5	53289	0.0093828	4	53289	0.00750624	0	53289	0	3	53289	0.00562968	11	53289	0.0206422	8	53289	0.0150125	2	53289	0.00375312	7	53289	0.0131359	15	53289	0.0281484	10	53289	0.0187656	7	53289	0.0131359	5	53289	0.0093828	11	53289	0.0206422
Perlabentimonas	0.0593757	0.0136051	0.0129588	0.00150125	0.00140429	0.00375312	0.00375312	0	53289	0	1	53289	0.00187656	1	53289	0.00187656	2	53289	0.00375312	0	53289	0	0	53289	0	2	53289	0.00375312	3	53289	0.00562968	0	53289	0	2	53289	0.00375312	7	53289	0.0131359	1	53289	0.00187656	2	53289	0.00375312	1	53289	0.00187656
Prolixibacter	0.724321	0.0136051	0.00987425	0.0322768	0.0570844	0.0283569	0.0179872	4	53289	0.00750624	2	53289	0.00375312	1	53289	0.00187656	1	53289	0.00187656	78	53289	0.146372	14	53289	0.0262718	15	53289	0.0281484	1	53289	0.00187656	12	53289	0.0225187	25	53289	0.046914	32	53289	0.0600499	21	53289	0.0394078	15	53289	0.0281484	1	53289	0.00187656
Anaerotruncus	0.173058	0.0131359	0.0120889	0.00412843	0.00434455	0.0127189	0.00636543	5	53289	0.0093828	1	53289	0.00187656	0	53289	0	0	53289	0	5	53289	0.0093828	3	53289	0.00562968	5	53289	0.0093828	7	53289	0.0131359	8	53289	0.0150125	0	53289	0	9	53289	0.016889	12	53289	0.0225187	8	53289	0.0150125	9	53289	0.016889
Burkholderia	0.0241171	0.0131359	0.0120889	0	0	0.00291909	0.00281291	0	53289	0	0	53289	0	0	53289	0	0	53289	0	0	53289	0	1	53289	0.00187656	0	53289	0	2	53289	0.00375312	1	53289	0.00187656	0	53289	0	5	53289	0.0093828	1	53289	0.00187656	1	53289	0.00187656	3	53289	0.00562968
Pseudoflavonifractor	0.096045	0.0131359	0.0029671	0.0093828	0.00427921	0.0202251	0.010496	7	53289	0.0131359	1	53289	0.00187656	7	53289	0.0131359	6	53289	0.0112594	4	53289	0.00750624	8	53289	0.0150125	8	53289	0.0150125	16	53289	0.030025	20	53289	0.0375312	19	53289	0.0356546	7	53289	0.0131359	6	53289	0.0112594	4	53289	0.00750624	9	53289	0.016889
Acidovorax	0.081164	0.0126668	0.00853525	0.00412843	0.00561716	0.00375312	0.00414923	8	53289	0.0150125	0	53289	0	0	53289	0	1	53289	0.00187656	2	53289	0.00375312	0	53289	0	3	53289	0.00562968	0	53289	0	6	53289	0.0112594	0	53289	0	5	53289	0.0093828	1	53289	0.00187656	3	53289	0.00562968	0	53289	0
Alloprevotella	0.929127	0.0126668	0.00743257	0.0127606	0.00643526	0.014387	0.00969051	4	53289	0.00750624	5	53289	0.0093828	4	53289	0.00750624	13	53289	0.0243953	8	53289	0.0150125	5	53289	0.0093828	2	53289	0.00375312	8	53289	0.0150125	19	53289	0.0356546	14	53289	0.0262718	3	53289	0.00562968	6	53289	0.0112594	7	53289	0.0131359	5	53289	0.0093828
Desulfohalovibrio	0.788785	0.0126668	0.0110522	0.010884	0.00665055	0.0093828	0.00523348	9	53289	0.016889	11	53289	0.0206422	3	53289	0.00562968	4	53289	0.00750624	2	53289	0.00375312	5	53289	0.0093828	3	53289	0.00562968	6	53289	0.0112594	4	53289	0.00750624	4	53289	0.00750624	3	53289	0.00562968	6	53289	0.0112594	12	53289	0.0225187	2	53289	0.00375312
Dethiosulfovibrio	0.389704	0.0126668	0.0112886	0.00562968	0.00872146	0.00542117	0.00583073	12	53289	0.0225187	0	53289	0	0	53289	0	0	53289	0	3	53289	0.00562968	0	53289	0	1	53289	0.00187656	2	53289	0.00375312	11	53289	0.0206422	4	53289	0.00750624	3	53289	0.00562968	3	53289	0.00562968	1	53289	0.00187656	1	53289	0.00187656
Flavonifractor	0.702857	0.0126668	0.0108917	0.00975811	0.00790831	0.016472	0.0161616	13	53289	0.0243953	3	53289	0.00562968	3	53289	0.00562968	1	53289	0.00187656	6	53289	0.0112594	1	53289	0.00187656	27	53289	0.0506671	0	53289	0	7	53289	0.0131359	21	53289	0.0394078	8	53289	0.0150125	5	53289	0.0093828	4	53289	0.00750624	6	53289	0.0112594
Proteiniborus	0.0469489	0.0126668	0.00731317	0.00675562	0.00551594	0.0191826	0.00847471	8	53289	0.0150125	6	53289	0.0112594	2	53289	0.00375312	0	53289	0	2	53289	0.00375312	9	53289	0.016889	14	53289	0.0262718	6	53289	0.0112594	15	53289	0.0281484	9	53289	0.016889	2	53289	0.00375312	16	53289	0.030025	7	53289	0.0131359	14	53289	0.0262718
Thermosporothrix	0.326968	0.0126668	0.00903627	0.0063803	0.00588654	0.0177231	0.0152481	9	53289	0.016889	0	53289	0	3	53289	0.00562968	4	53289	0.00750624	1	53289	0.00187656	18	53289	0.0337781	5	53289	0.0093828	6	53289	0.0112594	4	53289	0.00750624	27	53289	0.0506671	15	53289	0.0281484	5	53289	0.0093828	4	53289	0.00750624	1	53289	0.00187656
Alicyclobacillus	0.140184	0.0121976	0.00656796	0.00450374	0.00386407	0.00604669	0.00521683	6	53289	0.0112594	3	53289	0.00562968	0	53289	0	2	53289	0.00375312	1	53289	0.00187656	3	53289	0.00562968	4	53289	0.00750624	0	53289	0	4	53289	0.00750624	9	53289	0.016889	6	53289	0.0112594	2	53289	0.00375312	1	53289	0.00187656	0	53289	0
Cruoricaptor	0.0377755	0.0121976	0.00895062	0.00112594	0.00150125	0.00708923	0.00440339	0	53289	0	0	53289	0	1	53289	0.00187656	0	53289	0	2	53289	0.00375312	3	53289	0.00562968	8	53289	0.0150125	3	53289	0.00562968	4	53289	0.00750624	5	53289	0.0093828	7	53289	0.0131359	1	53289	0.00187656	2	53289	0.00375312	1	53289	0.00187656
Fictibacillus	0.305119	0.0121976	0.00487545	0.0127606	0.00899184	0.0198081	0.0100127	16	53289	0.030025	6	53289	0.0112594	3	53289	0.00562968	3	53289	0.00562968	6	53289	0.0112594	6	53289	0.0112594	16	53289	0.030025	10	53289	0.0187656	2	53289	0.00375312	17	53289	0.0319015	4	53289	0.00750624	10	53289	0.0187656	17	53289	0.0319015	13	53289	0.0243953
Metaprevotella	0.097278	0.0121976	0.00720707	0.00225187	0.00140429	0.00729773	0.00658696	2	53289	0.00375312	0	53289	0	2	53289	0.00375312	1	53289	0.00187656	1	53289	0.00187656	2	53289	0.00375312	6	53289	0.0112594	3	53289	0.00562968	3	53289	0.00562968	12	53289	0.0225187	0	53289	0	0	53289	0	3	53289	0.00562968	6	53289	0.0112594
Methanimicrococcus	0.269479	0.0121976	0.0169151	0.00187656	0.00290715	0.00375312	0.00500416	0	53289	0	0	53289	0	1	53289	0.00187656	4	53289	0.00750624	0	53289	0	0	53289	0	1	53289	0.00187656	5	53289	0.0093828	0	53289	0	1	53289	0.00187656	0	53289	0	0	53289	0	8	53289	0.0150125	3	53289	0.00562968
Paludibacter	0.488471	0.0121976	0.00386863	0.0360299	0.0467169	0.0525437	0.0620054	67	53289	0.12573	2	53289	0.00375312	7	53289	0.0131359	20	53289	0.0375312	0	53289	0	0	53289	0	93	53289	0.17452	3	53289	0.00562968	82	53289	0.153878	1	53289	0.00187656	29	53289	0.0544202	12	53289	0.0225187	17	53289	0.0319015	15	53289	0.0281484
Paludihabitans	0.475601	0.0121976	0.00539001	0.00225187	0.0030025	0.016889	0.026788	2	53289	0.00375312	0	53289	0	0	53289	0	0	53289	0	4	53289	0.00750624	0	53289	0	49	53289	0.0919514	5	53289	0.0093828	7	53289	0.0131359	3	53289	0.00562968	6	53289	0.0112594	3	53289	0.00562968	5	53289	0.0093828	3	53289	0.00562968
Pontibacter	0.0487281	0.0117285	0.0134259	0.00187656	0.00290715	0.000208507	0.000589746	0	53289	0	4	53289	0.00750624	0	53289	0	0	53289	0	1	53289	0.00187656	0	53289	0	0	53289	0	0	53289	0	0	53289	0	0	53289	0	0	53289	0	0	53289	0	1	53289	0.00187656	0	53289	0
Pseudoramibacter	0.415266	0.0117285	0.00584075	0.0105087	0.010455	0.0062552	0.00442309	6	53289	0.0112594	16	53289	0.030025	4	53289	0.00750624	2	53289	0.00375312	0	53289	0	8	53289	0.0150125	6	53289	0.0112594	3	53289	0.00562968	3	53289	0.00562968	5	53289	0.0093828	1	53289	0.00187656	1	53289	0.00187656	2	53289	0.00375312	1	53289	0.00187656
Silvanigrella	0.019826	0.0117285	0.00777981	0.000750624	0.000919323	0.00354461	0.00437367	1	53289	0.00187656	0	53289	0	0	53289	0	1	53289	0.00187656	0	53289	0	0	53289	0	0	53289	0	1	53289	0.00187656	6	53289	0.0112594	0	53289	0	0	53289	0	6	53289	0.0112594	2	53289	0.00375312	2	53289	0.00375312
Sporofaciens	0.622403	0.0117285	0.00743257	0.0146372	0.01201	0.0173061	0.0068965	17	53289	0.0319015	2	53289	0.00375312	14	53289	0.0262718	4	53289	0.00750624	2	53289	0.00375312	10	53289	0.0187656	9	53289	0.016889	2	53289	0.00375312	17	53289	0.0319015	7	53289	0.0131359	9	53289	0.016889	9	53289	0.016889	9	53289	0.016889	11	53289	0.0206422
Gottschalkia	0.106807	0.0112594	0.00663464	0.00600499	0.00598149	0.016055	0.00811303	7	53289	0.0131359	0	53289	0	0	53289	0	2	53289	0.00375312	7	53289	0.0131359	14	53289	0.0262718	10	53289	0.0187656	11	53289	0.0206422	14	53289	0.0262718	12	53289	0.0225187	5	53289	0.0093828	4	53289	0.00750624	2	53289	0.00375312	5	53289	0.0093828
Lactobacillus	0.625375	0.0112594	0.00807139	0.00713093	0.00275797	0.0183486	0.0267116	5	53289	0.0093828	4	53289	0.00750624	1	53289	0.00187656	4	53289	0.00750624	5	53289	0.0093828	0	53289	0	49	53289	0.0919514	6	53289	0.0112594	8	53289	0.0150125	7	53289	0.0131359	0	53289	0	2	53289	0.00375312	7	53289	0.0131359	9	53289	0.016889
Suilimivivens	0.143145	0.0112594	0.00702144	0.00337781	0.0030025	0.00542117	0.00534038	2	53289	0.00375312	0	53289	0	3	53289	0.00562968	0	53289	0	4	53289	0.00750624	1	53289	0.00187656	1	53289	0.00187656	0	53289	0	3	53289	0.00562968	1	53289	0.00187656	2	53289	0.00375312	8	53289	0.0150125	2	53289	0.00375312	8	53289	0.0150125
Traorella	0.407768	0.0112594	0.00663464	0.00713093	0.00685908	0.00604669	0.00457766	11	53289	0.0206422	2	53289	0.00375312	2	53289	0.00375312	3	53289	0.00562968	1	53289	0.00187656	2	53289	0.00375312	2	53289	0.00375312	2	53289	0.00375312	7	53289	0.0131359	0	53289	0	3	53289	0.00562968	3	53289	0.00562968	2	53289	0.00375312	8	53289	0.0150125
Gallibacter	0.285482	0.0107902	0.00800293	0.0217681	0.0225687	0.0331526	0.0240642	35	53289	0.0656796	9	53289	0.016889	1	53289	0.00187656	5	53289	0.0093828	8	53289	0.0150125	7	53289	0.0131359	16	53289	0.030025	5	53289	0.0093828	12	53289	0.0225187	10	53289	0.0187656	4	53289	0.00750624	33	53289	0.0619265	33	53289	0.0619265	39	53289	0.0731858
Halomonas	0.209912	0.0107902	0.0103954	0.0210175	0.0243056	0.00500416	0.00442309	36	53289	0.0675562	4	53289	0.00750624	3	53289	0.00562968	1	53289	0.00187656	12	53289	0.0225187	2	53289	0.00375312	2	53289	0.00375312	5	53289	0.0093828	4	53289	0.00750624	0	53289	0	4	53289	0.00750624	0	53289	0	0	53289	0	7	53289	0.0131359
Hippea	0.361328	0.0107902	0.00204493	0.0101334	0.0105889	0.00583819	0.00299263	6	53289	0.0112594	16	53289	0.030025	3	53289	0.00562968	0	53289	0	2	53289	0.00375312	2	53289	0.00375312	3	53289	0.00562968	3	53289	0.00562968	1	53289	0.00187656	4	53289	0.00750624	3	53289	0.00562968	2	53289	0.00375312	7	53289	0.0131359	3	53289	0.00562968
Vallitalea	0.973613	0.0107902	0.00406287	0.0105087	0.00483556	0.00959131	0.0117173	6	53289	0.0112594	10	53289	0.0187656	6	53289	0.0112594	3	53289	0.00562968	3	53289	0.00562968	1	53289	0.00187656	3	53289	0.00562968	5	53289	0.0093828	5	53289	0.0093828	22	53289	0.0412843	1	53289	0.00187656	4	53289	0.00750624	5	53289	0.0093828	0	53289	0
Xylanivirga	0.380279	0.0107902	0.0135564	0.0326521	0.0166412	0.0310675	0.0293676	15	53289	0.0281484	33	53289	0.0619265	19	53289	0.0356546	6	53289	0.0112594	14	53289	0.0262718	58	53289	0.10884	16	53289	0.030025	11	53289	0.0206422	3	53289	0.00562968	9	53289	0.016889	14	53289	0.0262718	22	53289	0.0412843	12	53289	0.0225187	4	53289	0.00750624
Acetobacterium	0.17425	0.0103211	0.0116059	0.00225187	0.00183865	0.00375312	0.00279741	1	53289	0.00187656	3	53289	0.00562968	0	53289	0	1	53289	0.00187656	1	53289	0.00187656	1	53289	0.00187656	1	53289	0.00187656	0	53289	0	4	53289	0.00750624	4	53289	0.00750624	0	53289	0	2	53289	0.00375312	3	53289	0.00562968	3	53289	0.00562968
Aeromonas	0.421047	0.0103211	0.00779394	0.0030025	0.00421287	0.00708923	0.00861211	0	53289	0	0	53289	0	1	53289	0.00187656	1	53289	0.00187656	6	53289	0.0112594	1	53289	0.00187656	0	53289	0	3	53289	0.00562968	7	53289	0.0131359	0	53289	0	0	53289	0	3	53289	0.00562968	5	53289	0.0093828	15	53289	0.0281484
BRC1_genera_incertae_sedis	0.000969415	0.0103211	0.00600792	0.00225187	0.00218843	0.00062552	0.000884619	3	53289	0.00562968	2	53289	0.00375312	1	53289	0.00187656	0	53289	0	0	53289	0	1	53289	0.00187656	0	53289	0	0	53289	0	1	53289	0.00187656	0	53289	0	0	53289	0	0	53289	0	0	53289	0	1	53289	0.00187656
Brevundimonas	0.0222086	0.0103211	0.00539001	0.0570474	0.0309627	0.0254378	0.018934	20	53289	0.0375312	20	53289	0.0375312	57	53289	0.106964	42	53289	0.0788155	13	53289	0.0243953	12	53289	0.0225187	19	53289	0.0356546	39	53289	0.0731858	14	53289	0.0262718	4	53289	0.00750624	11	53289	0.0206422	11	53289	0.0206422	3	53289	0.00562968	9	53289	0.016889
Gp23	0.106104	0.0103211	0.00386863	0.00337781	0.00450374	0.00583819	0.00409651	6	53289	0.0112594	3	53289	0.00562968	0	53289	0	0	53289	0	0	53289	0	6	53289	0.0112594	4	53289	0.00750624	2	53289	0.00375312	2	53289	0.00375312	1	53289	0.00187656	4	53289	0.00750624	0	53289	0	7	53289	0.0131359	2	53289	0.00375312
Lacticaseibacillus	0.00512423	0.0103211	0.00600792	0.0157631	0.0189375	0.0512926	0.0223092	28	53289	0.0525437	1	53289	0.00187656	3	53289	0.00562968	8	53289	0.0150125	2	53289	0.00375312	50	53289	0.093828	34	53289	0.063803	12	53289	0.0225187	10	53289	0.0187656	31	53289	0.0581734	25	53289	0.046914	18	53289	0.0337781	35	53289	0.0656796	31	53289	0.0581734
Mesoplasma	0.367399	0.0103211	0.00844452	0.00337781	0.00140429	0.0170975	0.0211282	2	53289	0.00375312	1	53289	0.00187656	1	53289	0.00187656	2	53289	0.00375312	3	53289	0.00562968	4	53289	0.00750624	40	53289	0.0750624	9	53289	0.016889	3	53289	0.00562968	11	53289	0.0206422	5	53289	0.0093828	4	53289	0.00750624	2	53289	0.00375312	4	53289	0.00750624
Planktothrix	0.294033	0.0103211	0.00997405	0.00187656	0.00167845	0.00729773	0.00783497	2	53289	0.00375312	0	53289	0	0	53289	0	1	53289	0.00187656	2	53289	0.00375312	0	53289	0	3	53289	0.00562968	15	53289	0.0281484	3	53289	0.00562968	1	53289	0.00187656	2	53289	0.00375312	2	53289	0.00375312	4	53289	0.00750624	5	53289	0.0093828
Psychromonas	0.0118319	0.0103211	0.00979593	0.000375312	0.000750624	0.000208507	0.000589746	1	53289	0.00187656	0	53289	0	0	53289	0	0	53289	0	0	53289	0	0	53289	0	0	53289	0	0	53289	0	1	53289	0.00187656	0	53289	0	0	53289	0	0	53289	0	0	53289	0	0	53289	0
Tepidisphaera	0.0590848	0.0103211	0.0122696	0.000375312	0.000750624	0.000834027	0.00179364	1	53289	0.00187656	0	53289	0	0	53289	0	0	53289	0	0	53289	0	0	53289	0	0	53289	0	0	53289	0	0	53289	0	0	53289	0	3	53289	0.00562968	1	53289	0.00187656	0	53289	0	0	53289	0
Terribacillus	0.662812	0.0103211	0.0126233	0.00487906	0.00468765	0.0062552	0.00750624	6	53289	0.0112594	0	53289	0	0	53289	0	5	53289	0.0093828	2	53289	0.00375312	10	53289	0.0187656	0	53289	0	0	53289	0	0	53289	0	0	53289	0	0	53289	0	4	53289	0.00750624	8	53289	0.0150125	8	53289	0.0150125
Brevibacterium	0.00145668	0.00985194	0.00706831	0.000375312	0.000750624	0.000208507	0.000589746	0	53289	0	0	53289	0	0	53289	0	1	53289	0.00187656	0	53289	0	0	53289	0	1	53289	0.00187656	0	53289	0	0	53289	0	0	53289	0	0	53289	0	0	53289	0	0	53289	0	0	53289	0
Chitinophaga	0.241582	0.00985194	0.00553108	0.00337781	0.00275797	0.00604669	0.00564895	3	53289	0.00562968	1	53289	0.00187656	1	53289	0.00187656	0	53289	0	4	53289	0.00750624	0	53289	0	3	53289	0.00562968	2	53289	0.00375312	0	53289	0	8	53289	0.0150125	2	53289	0.00375312	3	53289	0.00562968	9	53289	0.016889	2	53289	0.00375312
Exiguobacterium	0.0908008	0.00985194	0.00903627	0.000375312	0.000750624	0.00291909	0.0050903	0	53289	0	0	53289	0	1	53289	0.00187656	0	53289	0	0	53289	0	9	53289	0.016889	0	53289	0	1	53289	0.00187656	0	53289	0	0	53289	0	1	53289	0.00187656	0	53289	0	1	53289	0.00187656	2	53289	0.00375312
Novisyntrophococcus	0.195687	0.00985194	0.00520301	0.00750624	0.00314009	0.0177231	0.0127001	7	53289	0.0131359	4	53289	0.00750624	2	53289	0.00375312	4	53289	0.00750624	3	53289	0.00562968	8	53289	0.0150125	6	53289	0.0112594	2	53289	0.00375312	21	53289	0.0394078	5	53289	0.0093828	22	53289	0.0412843	9	53289	0.016889	4	53289	0.00750624	8	53289	0.0150125
Acutalibacter	0.306764	0.0093828	0.00880185	0.0431609	0.053579	0.0175146	0.0187864	3	53289	0.00562968	0	53289	0	76	53289	0.142619	6	53289	0.0112594	30	53289	0.0562968	36	53289	0.0675562	3	53289	0.00562968	5	53289	0.0093828	1	53289	0.00187656	9	53289	0.016889	2	53289	0.00375312	10	53289	0.0187656	7	53289	0.0131359	11	53289	0.0206422
Cryptobacterium	0.0250274	0.0093828	0.00859948	0.00225187	0.00275797	0.00062552	0.000884619	0	53289	0	4	53289	0.00750624	0	53289	0	1	53289	0.00187656	1	53289	0.00187656	1	53289	0.00187656	0	53289	0	0	53289	0	0	53289	0	1	53289	0.00187656	0	53289	0	0	53289	0	0	53289	0	1	53289	0.00187656
Ethanoligenens	0.051346	0.0093828	0.00547107	0.00225187	0.00183865	0.014804	0.0100646	3	53289	0.00562968	0	53289	0	1	53289	0.00187656	1	53289	0.00187656	1	53289	0.00187656	0	53289	0	8	53289	0.0150125	16	53289	0.030025	15	53289	0.0281484	8	53289	0.0150125	4	53289	0.00750624	4	53289	0.00750624	3	53289	0.00562968	13	53289	0.0243953
Isosphaera	0.539701	0.0093828	0.00513917	0.0063803	0.00756233	0.00479565	0.00567199	3	53289	0.00562968	11	53289	0.0206422	3	53289	0.00562968	0	53289	0	0	53289	0	5	53289	0.0093828	10	53289	0.0187656	2	53289	0.00375312	0	53289	0	3	53289	0.00562968	1	53289	0.00187656	1	53289	0.00187656	1	53289	0.00187656	0	53289	0
Kocuria	0.338455	0.0093828	0.00738802	0.00262718	0.00367729	0.00604669	0.00642661	5	53289	0.0093828	0	53289	0	0	53289	0	0	53289	0	2	53289	0.00375312	10	53289	0.0187656	0	53289	0	0	53289	0	0	53289	0	0	53289	0	5	53289	0.0093828	3	53289	0.00562968	4	53289	0.00750624	7	53289	0.0131359
Peptoniphilus	0.119743	0.0093828	0.00351072	0.00412843	0.00140429	0.00834027	0.00443291	2	53289	0.00375312	2	53289	0.00375312	3	53289	0.00562968	3	53289	0.00562968	1	53289	0.00187656	0	53289	0	4	53289	0.00750624	4	53289	0.00750624	7	53289	0.0131359	7	53289	0.0131359	2	53289	0.00375312	3	53289	0.00562968	7	53289	0.0131359	6	53289	0.0112594
Succinatimonas	0.0713983	0.0093828	0.00608075	0.00450374	0.00386407	0.0243953	0.0190142	0	53289	0	4	53289	0.00750624	0	53289	0	3	53289	0.00562968	5	53289	0.0093828	11	53289	0.0206422	10	53289	0.0187656	2	53289	0.00375312	19	53289	0.0356546	33	53289	0.0619265	0	53289	0	8	53289	0.0150125	9	53289	0.016889	25	53289	0.046914
Thermodesulfomicrobium	0.632477	0.0093828	0.00513917	0.0123853	0.0107865	0.00813176	0.00515817	7	53289	0.0131359	17	53289	0.0319015	6	53289	0.0112594	3	53289	0.00562968	0	53289	0	11	53289	0.0206422	4	53289	0.00750624	5	53289	0.0093828	5	53289	0.0093828	0	53289	0	3	53289	0.00562968	3	53289	0.00562968	4	53289	0.00750624	4	53289	0.00750624
Xiamenia	0.0499443	0.0093828	0.00807139	0.0030025	0.00600499	0.000417013	0.00117949	8	53289	0.0150125	0	53289	0	0	53289	0	0	53289	0	0	53289	0	0	53289	0	0	53289	0	0	53289	0	2	53289	0.00375312	0	53289	0	0	53289	0	0	53289	0	0	53289	0	0	53289	0
Anaeromyxobacter	0.137097	0.00891366	0.0122606	0.00150125	0.0030025	0.00062552	0.00125104	0	53289	0	0	53289	0	0	53289	0	0	53289	0	4	53289	0.00750624	0	53289	0	0	53289	0	0	53289	0	0	53289	0	0	53289	0	1	53289	0.00187656	0	53289	0	0	53289	0	2	53289	0.00375312
Armatimonadetes_gp2	0.110061	0.00891366	0.00335033	0.00375312	0.00167845	0.00479565	0.00386722	1	53289	0.00187656	3	53289	0.00562968	2	53289	0.00375312	1	53289	0.00187656	3	53289	0.00562968	0	53289	0	1	53289	0.00187656	3	53289	0.00562968	4	53289	0.00750624	0	53289	0	6	53289	0.0112594	3	53289	0.00562968	5	53289	0.0093828	1	53289	0.00187656
Enteroscipio	0.00984721	0.00891366	0.00598958	0.00975811	0.00434455	0.00208507	0.00224569	4	53289	0.00750624	6	53289	0.0112594	5	53289	0.0093828	9	53289	0.016889	2	53289	0.00375312	3	53289	0.00562968	0	53289	0	0	53289	0	0	53289	0	1	53289	0.00187656	2	53289	0.00375312	3	53289	0.00562968	1	53289	0.00187656	0	53289	0
Malacoplasma	0.0618303	0.00891366	0.0115202	0	0	0.000208507	0.000589746	0	53289	0	0	53289	0	0	53289	0	0	53289	0	0	53289	0	0	53289	0	0	53289	0	0	53289	0	0	53289	0	0	53289	0	0	53289	0	0	53289	0	0	53289	0	1	53289	0.00187656
Paraeggerthella	0.000121242	0.00891366	0.00406287	0.00112594	0.000919323	0.000834027	0.00128532	1	53289	0.00187656	0	53289	0	1	53289	0.00187656	1	53289	0.00187656	0	53289	0	0	53289	0	1	53289	0.00187656	0	53289	0	2	53289	0.00375312	1	53289	0.00187656	0	53289	0	0	53289	0	0	53289	0	0	53289	0
Simonsiella	0.138229	0.00891366	0.0132941	0.000375312	0.000750624	0.00062552	0.00125104	0	53289	0	0	53289	0	0	53289	0	0	53289	0	1	53289	0.00187656	1	53289	0.00187656	0	53289	0	0	53289	0	0	53289	0	0	53289	0	2	53289	0.00375312	0	53289	0	0	53289	0	0	53289	0
Aminivibrio	0.376813	0.00844452	0.0073282	0.0135112	0.0123568	0.00646371	0.00443291	13	53289	0.0243953	17	53289	0.0319015	1	53289	0.00187656	4	53289	0.00750624	1	53289	0.00187656	2	53289	0.00375312	4	53289	0.00750624	3	53289	0.00562968	1	53289	0.00187656	2	53289	0.00375312	5	53289	0.0093828	1	53289	0.00187656	9	53289	0.016889	4	53289	0.00750624
Anaerosporobacter	0.329437	0.00844452	0.00281484	0.0187656	0.00964194	0.0494161	0.0632487	9	53289	0.016889	9	53289	0.016889	10	53289	0.0187656	3	53289	0.00562968	19	53289	0.0356546	31	53289	0.0581734	118	53289	0.221434	7	53289	0.0131359	7	53289	0.0131359	29	53289	0.0544202	9	53289	0.016889	12	53289	0.0225187	20	53289	0.0375312	4	53289	0.00750624
Bulleidia	0.0784203	0.00844452	0.00756465	0.0176397	0.0129251	0.0225187	0.00573299	18	53289	0.0337781	17	53289	0.0319015	4	53289	0.00750624	1	53289	0.00187656	7	53289	0.0131359	17	53289	0.0319015	11	53289	0.0206422	10	53289	0.0187656	8	53289	0.0150125	7	53289	0.0131359	14	53289	0.0262718	14	53289	0.0262718	14	53289	0.0262718	13	53289	0.0243953
Desulfurella	0.562237	0.00844452	0.0073282	0.00863218	0.00645711	0.0145955	0.0134967	10	53289	0.0187656	5	53289	0.0093828	0	53289	0	6	53289	0.0112594	2	53289	0.00375312	1	53289	0.00187656	1	53289	0.00187656	24	53289	0.0450374	16	53289	0.030025	6	53289	0.0112594	2	53289	0.00375312	8	53289	0.0150125	6	53289	0.0112594	6	53289	0.0112594
Facklamia	0.408566	0.00844452	0.00539001	0.00337781	0.00183865	0.0093828	0.00952764	2	53289	0.00375312	0	53289	0	2	53289	0.00375312	2	53289	0.00375312	3	53289	0.00562968	4	53289	0.00750624	4	53289	0.00750624	14	53289	0.0262718	5	53289	0.0093828	14	53289	0.0262718	0	53289	0	2	53289	0.00375312	2	53289	0.00375312	0	53289	0
Gelria	0.405998	0.00844452	0.0104903	0.000750624	0.000919323	0.00479565	0.00816111	1	53289	0.00187656	1	53289	0.00187656	0	53289	0	0	53289	0	0	53289	0	0	53289	0	4	53289	0.00750624	14	53289	0.0262718	0	53289	0	4	53289	0.00750624	1	53289	0.00187656	0	53289	0	0	53289	0	0	53289	0
Ligilactobacillus	0.108322	0.00844452	0.00756465	0.00412843	0.00248954	0.0216847	0.0184101	2	53289	0.00375312	0	53289	0	3	53289	0.00562968	4	53289	0.00750624	2	53289	0.00375312	0	53289	0	8	53289	0.0150125	6	53289	0.0112594	28	53289	0.0525437	1	53289	0.00187656	19	53289	0.0356546	17	53289	0.0319015	2	53289	0.00375312	23	53289	0.0431609
Limisphaera	0.539635	0.00844452	0.00629417	0.0101334	0.0166412	0.00396163	0.0028589	1	53289	0.00187656	0	53289	0	0	53289	0	3	53289	0.00562968	23	53289	0.0431609	1	53289	0.00187656	0	53289	0	3	53289	0.00562968	1	53289	0.00187656	1	53289	0.00187656	4	53289	0.00750624	4	53289	0.00750624	4	53289	0.00750624	1	53289	0.00187656
Muricauda	0.00977177	0.00844452	0.00615271	0.00187656	0.00167845	0.00145955	0.00078016	2	53289	0.00375312	0	53289	0	0	53289	0	1	53289	0.00187656	2	53289	0.00375312	0	53289	0	1	53289	0.00187656	1	53289	0.00187656	1	53289	0.00187656	1	53289	0.00187656	1	53289	0.00187656	1	53289	0.00187656	1	53289	0.00187656	0	53289	0
Niallia	0.111895	0.00844452	0.00209806	0.00150125	0.00140429	0.00562968	0.00580083	2	53289	0.00375312	1	53289	0.00187656	0	53289	0	1	53289	0.00187656	0	53289	0	4	53289	0.00750624	0	53289	0	1	53289	0.00187656	0	53289	0	0	53289	0	10	53289	0.0187656	4	53289	0.00750624	5	53289	0.0093828	3	53289	0.00562968
Selenihalanaerobacter	0.121066	0.00844452	0.00656796	0.00487906	0.00404223	0.0170975	0.0124617	4	53289	0.00750624	5	53289	0.0093828	0	53289	0	0	53289	0	4	53289	0.00750624	1	53289	0.00187656	16	53289	0.030025	8	53289	0.0150125	6	53289	0.0112594	0	53289	0	17	53289	0.0319015	11	53289	0.0206422	4	53289	0.00750624	19	53289	0.0356546
Tepidimicrobium	0.901004	0.00844452	0.00429974	0.00788155	0.00772815	0.0100083	0.00948648	11	53289	0.0206422	1	53289	0.00187656	1	53289	0.00187656	1	53289	0.00187656	7	53289	0.0131359	2	53289	0.00375312	5	53289	0.0093828	3	53289	0.00562968	18	53289	0.0337781	4	53289	0.00750624	9	53289	0.016889	1	53289	0.00187656	1	53289	0.00187656	5	53289	0.0093828
Thermodesulfobium	0.0158266	0.00844452	0.00539001	0.00262718	0.000919323	0.00187656	0.00234048	1	53289	0.00187656	1	53289	0.00187656	2	53289	0.00375312	1	53289	0.00187656	2	53289	0.00375312	0	53289	0	0	53289	0	1	53289	0.00187656	4	53289	0.00750624	2	53289	0.00375312	1	53289	0.00187656	0	53289	0	0	53289	0	1	53289	0.00187656
Zhaonella	0.323497	0.00844452	0.0073282	0.0030025	0.00254549	0.00542117	0.00419093	3	53289	0.00562968	3	53289	0.00562968	0	53289	0	0	53289	0	2	53289	0.00375312	5	53289	0.0093828	0	53289	0	6	53289	0.0112594	0	53289	0	5	53289	0.0093828	0	53289	0	3	53289	0.00562968	3	53289	0.00562968	4	53289	0.00750624
Acetonema	0.381517	0.00797538	0.00681465	0.00788155	0.00967111	0.015221	0.0110292	14	53289	0.0262718	0	53289	0	0	53289	0	4	53289	0.00750624	3	53289	0.00562968	0	53289	0	13	53289	0.0243953	18	53289	0.0337781	0	53289	0	4	53289	0.00750624	13	53289	0.0243953	5	53289	0.0093828	10	53289	0.0187656	10	53289	0.0187656
Apibacter	0.186922	0.00797538	0.00598958	0.00150125	0.00140429	0.00375312	0.00500416	1	53289	0.00187656	0	53289	0	0	53289	0	1	53289	0.00187656	2	53289	0.00375312	0	53289	0	0	53289	0	5	53289	0.0093828	8	53289	0.0150125	3	53289	0.00562968	0	53289	0	0	53289	0	1	53289	0.00187656	1	53289	0.00187656
Cellulosibacter	0.102188	0.00797538	0.00598958	0.00262718	0.00150125	0.00813176	0.00405383	2	53289	0.00375312	2	53289	0.00375312	1	53289	0.00187656	0	53289	0	2	53289	0.00375312	2	53289	0.00375312	4	53289	0.00750624	4	53289	0.00750624	5	53289	0.0093828	7	53289	0.0131359	6	53289	0.0112594	0	53289	0	4	53289	0.00750624	7	53289	0.0131359
Desulfonema	0.139384	0.00797538	0.00335033	0.00225187	0.00218843	0.00667221	0.00501284	0	53289	0	1	53289	0.00187656	2	53289	0.00375312	3	53289	0.00562968	0	53289	0	0	53289	0	1	53289	0.00187656	10	53289	0.0187656	3	53289	0.00562968	4	53289	0.00750624	5	53289	0.0093828	3	53289	0.00562968	3	53289	0.00562968	3	53289	0.00562968
Rubneribacter	0.00112678	0.00797538	0.0117472	0.0247706	0.0107079	0.00187656	0.00176924	21	53289	0.0394078	5	53289	0.0093828	18	53289	0.0337781	10	53289	0.0187656	12	53289	0.0225187	3	53289	0.00562968	0	53289	0	0	53289	0	0	53289	0	2	53289	0.00375312	1	53289	0.00187656	1	53289	0.00187656	1	53289	0.00187656	1	53289	0.00187656
Saccharicrinis	0.512096	0.00797538	0.00335033	0.00412843	0.00382745	0.00542117	0.00519177	2	53289	0.00375312	0	53289	0	0	53289	0	5	53289	0.0093828	4	53289	0.00750624	0	53289	0	0	53289	0	2	53289	0.00375312	3	53289	0.00562968	9	53289	0.016889	1	53289	0.00187656	2	53289	0.00375312	6	53289	0.0112594	3	53289	0.00562968
Stenotrophobacter	0.216135	0.00797538	0.00743257	0.00262718	0.00191372	0.00291909	0.00376469	2	53289	0.00375312	3	53289	0.00562968	1	53289	0.00187656	0	53289	0	1	53289	0.00187656	1	53289	0.00187656	1	53289	0.00187656	1	53289	0.00187656	2	53289	0.00375312	7	53289	0.0131359	1	53289	0.00187656	0	53289	0	1	53289	0.00187656	0	53289	0
Tannerella	0.122012	0.00797538	0.00485282	0.00150125	0.00218843	0.00354461	0.00446224	3	53289	0.00562968	0	53289	0	0	53289	0	1	53289	0.00187656	0	53289	0	1	53289	0.00187656	5	53289	0.0093828	0	53289	0	7	53289	0.0131359	2	53289	0.00375312	0	53289	0	0	53289	0	0	53289	0	2	53289	0.00375312
Faecalibacillus	0.152829	0.00750624	0.00459661	0.00225187	0.00218843	0.00917429	0.00699042	0	53289	0	3	53289	0.00562968	2	53289	0.00375312	0	53289	0	1	53289	0.00187656	2	53289	0.00375312	12	53289	0.0225187	4	53289	0.00750624	4	53289	0.00750624	5	53289	0.0093828	11	53289	0.0206422	3	53289	0.00562968	2	53289	0.00375312	1	53289	0.00187656
Lachnotalea	0.0484616	0.00750624	0.00578395	0.000750624	0.000919323	0.00813176	0.00515817	1	53289	0.00187656	1	53289	0.00187656	0	53289	0	0	53289	0	0	53289	0	1	53289	0.00187656	4	53289	0.00750624	4	53289	0.00750624	5	53289	0.0093828	11	53289	0.0206422	2	53289	0.00375312	2	53289	0.00375312	5	53289	0.0093828	5	53289	0.0093828
Parvimonas	0.274124	0.00750624	0.0119424	0.00112594	0.00150125	0.00166805	0.00164178	2	53289	0.00375312	0	53289	0	0	53289	0	1	53289	0.00187656	0	53289	0	1	53289	0.00187656	0	53289	0	0	53289	0	1	53289	0.00187656	0	53289	0	2	53289	0.00375312	2	53289	0.00375312	2	53289	0.00375312	0	53289	0
Parvularcula	0.10609	0.00750624	0.00398078	0.00187656	0.00290715	0.00604669	0.00383335	0	53289	0	1	53289	0.00187656	0	53289	0	0	53289	0	4	53289	0.00750624	2	53289	0.00375312	4	53289	0.00750624	5	53289	0.0093828	0	53289	0	4	53289	0.00750624	5	53289	0.0093828	6	53289	0.0112594	0	53289	0	3	53289	0.00562968
Peptostreptococcus	0.0643277	0.00750624	0.00547107	0.000750624	0.00150125	0.00375312	0.00330994	0	53289	0	2	53289	0.00375312	0	53289	0	0	53289	0	0	53289	0	2	53289	0.00375312	0	53289	0	5	53289	0.0093828	3	53289	0.00562968	0	53289	0	0	53289	0	4	53289	0.00750624	3	53289	0.00562968	1	53289	0.00187656
Peribacillus	0.641224	0.00750624	0.0119424	0.00337781	0.00343979	0.00375312	0.00405383	4	53289	0.00750624	4	53289	0.00750624	1	53289	0.00187656	0	53289	0	0	53289	0	0	53289	0	0	53289	0	3	53289	0.00562968	5	53289	0.0093828	0	53289	0	2	53289	0.00375312	0	53289	0	2	53289	0.00375312	6	53289	0.0112594
Romboutsia	0.614253	0.00750624	0.00265386	0.00487906	0.00386407	0.00458715	0.00546112	1	53289	0.00187656	4	53289	0.00750624	1	53289	0.00187656	6	53289	0.0112594	1	53289	0.00187656	0	53289	0	0	53289	0	2	53289	0.00375312	4	53289	0.00750624	5	53289	0.0093828	2	53289	0.00375312	9	53289	0.016889	0	53289	0	0	53289	0
Salinivirga	0.683105	0.00750624	0.00478431	0.0127606	0.0110955	0.0125104	0.00969051	17	53289	0.0319015	0	53289	0	8	53289	0.0150125	7	53289	0.0131359	2	53289	0.00375312	1	53289	0.00187656	15	53289	0.0281484	0	53289	0	5	53289	0.0093828	12	53289	0.0225187	6	53289	0.0112594	13	53289	0.0243953	2	53289	0.00375312	6	53289	0.0112594
Sellimonas	0.019403	0.00750624	0.0059342	0.00487906	0.00453491	0.0210592	0.0117617	6	53289	0.0112594	1	53289	0.00187656	5	53289	0.0093828	1	53289	0.00187656	0	53289	0	4	53289	0.00750624	9	53289	0.016889	20	53289	0.0375312	12	53289	0.0225187	17	53289	0.0319015	4	53289	0.00750624	6	53289	0.0112594	8	53289	0.0150125	21	53289	0.0394078
Thermocaproicibacter	0.320576	0.00750624	0.00578395	0.00375312	0.00265386	0.00396163	0.00299263	1	53289	0.00187656	3	53289	0.00562968	4	53289	0.00750624	0	53289	0	2	53289	0.00375312	3	53289	0.00562968	0	53289	0	1	53289	0.00187656	4	53289	0.00750624	0	53289	0	1	53289	0.00187656	2	53289	0.00375312	4	53289	0.00750624	4	53289	0.00750624
Aerococcus	0.0950225	0.0070371	0.00485282	0.00187656	0.00205567	0.00271059	0.00281291	1	53289	0.00187656	3	53289	0.00562968	0	53289	0	1	53289	0.00187656	0	53289	0	4	53289	0.00750624	1	53289	0.00187656	1	53289	0.00187656	0	53289	0	2	53289	0.00375312	1	53289	0.00187656	0	53289	0	4	53289	0.00750624	0	53289	0
Chryseobacterium	0.213675	0.0070371	0.00406287	0.00187656	0.00237368	0.0127189	0.0133509	0	53289	0	0	53289	0	0	53289	0	2	53289	0.00375312	3	53289	0.00562968	0	53289	0	15	53289	0.0281484	19	53289	0.0356546	14	53289	0.0262718	1	53289	0.00187656	9	53289	0.016889	1	53289	0.00187656	2	53289	0.00375312	0	53289	0
Curtobacterium	0.0598517	0.0070371	0.00706831	0.00112594	0.00150125	0.00125104	0.0015322	0	53289	0	0	53289	0	0	53289	0	1	53289	0.00187656	2	53289	0.00375312	0	53289	0	1	53289	0.00187656	0	53289	0	1	53289	0.00187656	0	53289	0	0	53289	0	2	53289	0.00375312	2	53289	0.00375312	0	53289	0
Ileibacterium	0.177125	0.0070371	0.00731317	0.0198915	0.0162558	0.0615095	0.0655859	25	53289	0.046914	16	53289	0.030025	6	53289	0.0112594	2	53289	0.00375312	4	53289	0.00750624	97	53289	0.182026	95	53289	0.178273	24	53289	0.0450374	3	53289	0.00562968	3	53289	0.00562968	5	53289	0.0093828	25	53289	0.046914	27	53289	0.0506671	16	53289	0.030025
Kineococcus	0.142934	0.0070371	0.00384008	0.00337781	0.00450374	0.00250208	0.00197807	0	53289	0	3	53289	0.00562968	6	53289	0.0112594	0	53289	0	0	53289	0	0	53289	0	2	53289	0.00375312	0	53289	0	2	53289	0.00375312	2	53289	0.00375312	3	53289	0.00562968	2	53289	0.00375312	0	53289	0	1	53289	0.00187656
Methanomicrobium	0.268998	0.0070371	0.00520301	0.0157631	0.0287206	0.0537947	0.0649457	1	53289	0.00187656	0	53289	0	1	53289	0.00187656	1	53289	0.00187656	39	53289	0.0731858	5	53289	0.0093828	1	53289	0.00187656	5	53289	0.0093828	0	53289	0	1	53289	0.00187656	101	53289	0.189533	35	53289	0.0656796	37	53289	0.0694327	73	53289	0.136989
Microbacterium	0.0467657	0.0070371	0.00553108	0.0195162	0.0162124	0.00437864	0.00279741	1	53289	0.00187656	26	53289	0.0487906	10	53289	0.0187656	11	53289	0.0206422	4	53289	0.00750624	5	53289	0.0093828	2	53289	0.00375312	0	53289	0	3	53289	0.00562968	3	53289	0.00562968	3	53289	0.00562968	0	53289	0	3	53289	0.00562968	2	53289	0.00375312
Robinsoniella	0.0376709	0.0070371	0.00427407	0.0150125	0.00731618	0.0952875	0.0799823	3	53289	0.00562968	7	53289	0.0131359	12	53289	0.0225187	13	53289	0.0243953	5	53289	0.0093828	14	53289	0.0262718	52	53289	0.0975811	16	53289	0.030025	12	53289	0.0225187	10	53289	0.0187656	57	53289	0.106964	79	53289	0.148248	69	53289	0.129483	148	53289	0.277731
Thermophagus	0.426487	0.0070371	0.00627667	0.00337781	0.00183865	0.00667221	0.00443291	2	53289	0.00375312	0	53289	0	2	53289	0.00375312	2	53289	0.00375312	3	53289	0.00562968	1	53289	0.00187656	5	53289	0.0093828	2	53289	0.00375312	0	53289	0	5	53289	0.0093828	8	53289	0.0150125	5	53289	0.0093828	2	53289	0.00375312	4	53289	0.00750624
Zhenhengia	0.160852	0.0070371	0.00277547	0.000750624	0.00150125	0.00688072	0.00713202	2	53289	0.00375312	0	53289	0	0	53289	0	0	53289	0	0	53289	0	0	53289	0	1	53289	0.00187656	1	53289	0.00187656	6	53289	0.0112594	3	53289	0.00562968	3	53289	0.00562968	5	53289	0.0093828	1	53289	0.00187656	13	53289	0.0243953
Anaerococcus	0.139291	0.00656796	0.00933577	0.00112594	0.00150125	0.000417013	0.00078016	2	53289	0.00375312	0	53289	0	0	53289	0	1	53289	0.00187656	0	53289	0	1	53289	0.00187656	0	53289	0	0	53289	0	0	53289	0	0	53289	0	0	53289	0	0	53289	0	1	53289	0.00187656	0	53289	0
Caldimonas	0.000498002	0.00656796	0.00311192	0.00112594	0.00150125	0.000417013	0.00117949	0	53289	0	0	53289	0	0	53289	0	1	53289	0.00187656	2	53289	0.00375312	0	53289	0	0	53289	0	0	53289	0	2	53289	0.00375312	0	53289	0	0	53289	0	0	53289	0	0	53289	0	0	53289	0
Denitrobacterium	0.390954	0.00656796	0.00933577	0.00450374	0.00564218	0.00166805	0.00206411	3	53289	0.00562968	0	53289	0	8	53289	0.0150125	0	53289	0	1	53289	0.00187656	2	53289	0.00375312	0	53289	0	0	53289	0	2	53289	0.00375312	1	53289	0.00187656	0	53289	0	3	53289	0.00562968	0	53289	0	0	53289	0
Glutamicibacter	0.00933692	0.00656796	0.00093828	0.00262718	0.00150125	0.00229357	0.00230303	2	53289	0.00375312	2	53289	0.00375312	1	53289	0.00187656	0	53289	0	2	53289	0.00375312	0	53289	0	1	53289	0.00187656	4	53289	0.00750624	0	53289	0	0	53289	0	1	53289	0.00187656	2	53289	0.00375312	2	53289	0.00375312	1	53289	0.00187656
Aliicoccus	0.0563992	0.00609882	0.00766581	0.000375312	0.000750624	0	0	0	53289	0	0	53289	0	0	53289	0	0	53289	0	1	53289	0.00187656	0	53289	0	0	53289	0	0	53289	0	0	53289	0	0	53289	0	0	53289	0	0	53289	0	0	53289	0	0	53289	0
Anaerocella	0.033847	0.00609882	0.00360353	0.000375312	0.000750624	0.00229357	0.00290416	1	53289	0.00187656	0	53289	0	0	53289	0	0	53289	0	0	53289	0	0	53289	0	1	53289	0.00187656	0	53289	0	0	53289	0	1	53289	0.00187656	2	53289	0.00375312	5	53289	0.0093828	2	53289	0.00375312	0	53289	0
Anaeromassilibacillus	0.0420068	0.00609882	0.00406287	0.00262718	0.00327189	0.015638	0.0108343	4	53289	0.00750624	0	53289	0	0	53289	0	0	53289	0	3	53289	0.00562968	5	53289	0.0093828	22	53289	0.0412843	11	53289	0.0206422	6	53289	0.0112594	10	53289	0.0187656	2	53289	0.00375312	5	53289	0.0093828	11	53289	0.0206422	3	53289	0.00562968
Brachybacterium	0.00619525	0.00609882	0.00384008	0	0	0.00166805	0.00186494	0	53289	0	0	53289	0	0	53289	0	0	53289	0	0	53289	0	3	53289	0.00562968	0	53289	0	1	53289	0.00187656	0	53289	0	0	53289	0	0	53289	0	1	53289	0.00187656	2	53289	0.00375312	1	53289	0.00187656
Cellulophaga	0.0488597	0.00609882	0.00466788	0.00562968	0.00118684	0.00187656	0.00234048	2	53289	0.00375312	3	53289	0.00562968	3	53289	0.00562968	4	53289	0.00750624	3	53289	0.00562968	0	53289	0	1	53289	0.00187656	1	53289	0.00187656	0	53289	0	0	53289	0	1	53289	0.00187656	0	53289	0	2	53289	0.00375312	4	53289	0.00750624
Desulfonauticus	0.496207	0.00609882	0.00641539	0.00337781	0.00248954	0.00959131	0.0111702	2	53289	0.00375312	1	53289	0.00187656	2	53289	0.00375312	0	53289	0	4	53289	0.00750624	0	53289	0	2	53289	0.00375312	0	53289	0	0	53289	0	16	53289	0.030025	0	53289	0	5	53289	0.0093828	13	53289	0.0243953	10	53289	0.0187656
Faecalicoccus	0.177783	0.00609882	0.00204493	0.0146372	0.0164196	0.0239783	0.0158438	24	53289	0.0450374	10	53289	0.0187656	3	53289	0.00562968	1	53289	0.00187656	1	53289	0.00187656	27	53289	0.0506671	16	53289	0.030025	6	53289	0.0112594	0	53289	0	25	53289	0.046914	6	53289	0.0112594	14	53289	0.0262718	8	53289	0.0150125	13	53289	0.0243953
Hungatella	0.493002	0.00609882	0.00466788	0.00225187	0.00140429	0.00396163	0.00511585	1	53289	0.00187656	2	53289	0.00375312	2	53289	0.00375312	1	53289	0.00187656	0	53289	0	1	53289	0.00187656	0	53289	0	0	53289	0	9	53289	0.016889	4	53289	0.00750624	2	53289	0.00375312	0	53289	0	2	53289	0.00375312	1	53289	0.00187656
Lysobacter	0.0293149	0.00609882	0.00553108	0	0	0.00104253	0.00199993	0	53289	0	0	53289	0	0	53289	0	0	53289	0	0	53289	0	0	53289	0	0	53289	0	0	53289	0	0	53289	0	0	53289	0	2	53289	0.00375312	0	53289	0	0	53289	0	3	53289	0.00562968
Methanocorpusculum	0.0184527	0.00609882	0.00641539	0	0	0	0	0	53289	0	0	53289	0	0	53289	0	0	53289	0	0	53289	0	0	53289	0	0	53289	0	0	53289	0	0	53289	0	0	53289	0	0	53289	0	0	53289	0	0	53289	0	0	53289	0
Neisseria	0.427189	0.00609882	0.00447531	0.00225187	0.00275797	0.00542117	0.00511585	1	53289	0.00187656	0	53289	0	4	53289	0.00750624	1	53289	0.00187656	0	53289	0	0	53289	0	3	53289	0.00562968	3	53289	0.00562968	8	53289	0.0150125	7	53289	0.0131359	0	53289	0	3	53289	0.00562968	1	53289	0.00187656	1	53289	0.00187656
Pasteurella	0.341368	0.00609882	0.00743257	0.000750624	0.00150125	0.00333611	0.00449137	0	53289	0	0	53289	0	0	53289	0	2	53289	0.00375312	0	53289	0	3	53289	0.00562968	0	53289	0	1	53289	0.00187656	1	53289	0.00187656	8	53289	0.0150125	2	53289	0.00375312	0	53289	0	1	53289	0.00187656	0	53289	0
Psychromicrobium	0.165793	0.00609882	0.00853525	0	0	0.00125104	0.00234048	0	53289	0	0	53289	0	0	53289	0	0	53289	0	0	53289	0	3	53289	0.00562968	0	53289	0	0	53289	0	0	53289	0	0	53289	0	3	53289	0.00562968	0	53289	0	0	53289	0	0	53289	0
Quadrisphaera	0.265006	0.00609882	0.00655118	0.00562968	0.00375312	0.00208507	0.00312064	4	53289	0.00750624	2	53289	0.00375312	6	53289	0.0112594	0	53289	0	3	53289	0.00562968	0	53289	0	0	53289	0	0	53289	0	3	53289	0.00562968	1	53289	0.00187656	5	53289	0.0093828	1	53289	0.00187656	0	53289	0	0	53289	0
Rhizobium	0.0133798	0.00609882	0.00536955	0.268348	0.0972051	0.15075	0.128763	97	53289	0.182026	175	53289	0.328398	119	53289	0.223311	229	53289	0.429732	95	53289	0.178273	124	53289	0.232693	24	53289	0.0450374	20	53289	0.0375312	73	53289	0.136989	2	53289	0.00375312	218	53289	0.40909	51	53289	0.0957046	49	53289	0.0919514	162	53289	0.304003
Schlesneria	0.180931	0.00609882	0.00447531	0.00375312	0.00265386	0.0131359	0.0113286	2	53289	0.00375312	1	53289	0.00187656	0	53289	0	4	53289	0.00750624	3	53289	0.00562968	0	53289	0	12	53289	0.0225187	7	53289	0.0131359	3	53289	0.00562968	3	53289	0.00562968	21	53289	0.0394078	7	53289	0.0131359	2	53289	0.00375312	8	53289	0.0150125
Vibrio	0.429028	0.00609882	0.00731317	0.00112594	0.00225187	0.00396163	0.00511585	3	53289	0.00562968	0	53289	0	0	53289	0	0	53289	0	0	53289	0	1	53289	0.00187656	0	53289	0	2	53289	0.00375312	9	53289	0.016889	0	53289	0	2	53289	0.00375312	4	53289	0.00750624	1	53289	0.00187656	0	53289	0
Ancylomarina	0.341202	0.00562968	0.00578395	0.0105087	0.0124816	0.00354461	0.00336207	1	53289	0.00187656	0	53289	0	2	53289	0.00375312	7	53289	0.0131359	18	53289	0.0337781	0	53289	0	1	53289	0.00187656	1	53289	0.00187656	0	53289	0	0	53289	0	3	53289	0.00562968	4	53289	0.00750624	3	53289	0.00562968	5	53289	0.0093828
Caldicellulosiruptor	0.142985	0.00562968	0.00562968	0.00225187	0.00275797	0.00708923	0.00316216	3	53289	0.00562968	0	53289	0	0	53289	0	0	53289	0	3	53289	0.00562968	3	53289	0.00562968	5	53289	0.0093828	7	53289	0.0131359	1	53289	0.00187656	2	53289	0.00375312	3	53289	0.00562968	4	53289	0.00750624	4	53289	0.00750624	5	53289	0.0093828
Catenibacterium	0.0880155	0.00562968	0.0029671	0.010884	0.0100286	0.0302335	0.0239247	0	53289	0	1	53289	0.00187656	7	53289	0.0131359	15	53289	0.0281484	6	53289	0.0112594	1	53289	0.00187656	5	53289	0.0093828	3	53289	0.00562968	45	53289	0.0844452	18	53289	0.0337781	21	53289	0.0394078	23	53289	0.0431609	18	53289	0.0337781	11	53289	0.0206422
Coraliomargarita	0.360726	0.00562968	0.00689492	0.00112594	0.00150125	0.00271059	0.00355074	1	53289	0.00187656	0	53289	0	0	53289	0	2	53289	0.00375312	0	53289	0	0	53289	0	1	53289	0.00187656	0	53289	0	0	53289	0	2	53289	0.00375312	3	53289	0.00562968	6	53289	0.0112594	1	53289	0.00187656	0	53289	0
Deinococcus	0.129154	0.00562968	0.00419612	0.00788155	0.00621252	0.00271059	0.00156032	10	53289	0.0187656	5	53289	0.0093828	1	53289	0.00187656	1	53289	0.00187656	4	53289	0.00750624	1	53289	0.00187656	0	53289	0	3	53289	0.00562968	2	53289	0.00375312	1	53289	0.00187656	1	53289	0.00187656	2	53289	0.00375312	2	53289	0.00375312	1	53289	0.00187656
Desulfonatronum	0.169027	0.00562968	0.00351072	0.00225187	0.00363878	0.00166805	0.00241364	5	53289	0.0093828	1	53289	0.00187656	0	53289	0	0	53289	0	0	53289	0	0	53289	0	1	53289	0.00187656	0	53289	0	4	53289	0.00750624	1	53289	0.00187656	0	53289	0	0	53289	0	0	53289	0	2	53289	0.00375312
Fastidiosipila	0.644947	0.00562968	0.00478431	0.0142619	0.0177471	0.0139699	0.0149893	26	53289	0.0487906	3	53289	0.00562968	1	53289	0.00187656	1	53289	0.00187656	7	53289	0.0131359	3	53289	0.00562968	11	53289	0.0206422	2	53289	0.00375312	28	53289	0.0525437	10	53289	0.0187656	1	53289	0.00187656	5	53289	0.0093828	5	53289	0.0093828	2	53289	0.00375312
Gp17	0.0219976	0.00562968	0.00229831	0.00337781	0.00322856	0.000834027	0.00179364	2	53289	0.00375312	5	53289	0.0093828	1	53289	0.00187656	0	53289	0	1	53289	0.00187656	0	53289	0	0	53289	0	0	53289	0	0	53289	0	0	53289	0	0	53289	0	0	53289	0	1	53289	0.00187656	3	53289	0.00562968
Lachnobacterium	0.541715	0.00562968	0.00513917	0.010884	0.00621252	0.0112594	0.00948648	3	53289	0.00562968	8	53289	0.0150125	2	53289	0.00375312	5	53289	0.0093828	11	53289	0.0206422	0	53289	0	12	53289	0.0225187	12	53289	0.0225187	4	53289	0.00750624	12	53289	0.0225187	0	53289	0	5	53289	0.0093828	0	53289	0	9	53289	0.016889
Luteimonas	0.445334	0.00562968	0.00398078	0.00187656	0.00205567	0.0031276	0.00468096	0	53289	0	0	53289	0	1	53289	0.00187656	1	53289	0.00187656	3	53289	0.00562968	0	53289	0	3	53289	0.00562968	0	53289	0	0	53289	0	0	53289	0	8	53289	0.0150125	0	53289	0	2	53289	0.00375312	2	53289	0.00375312
Nonlabens	0.147655	0.00562968	0.00513917	0.000375312	0.000750624	0.00208507	0.0034765	0	53289	0	1	53289	0.00187656	0	53289	0	0	53289	0	0	53289	0	0	53289	0	1	53289	0.00187656	0	53289	0	5	53289	0.0093828	4	53289	0.00750624	0	53289	0	0	53289	0	0	53289	0	0	53289	0
Peptococcus	0.599658	0.00562968	0.00663464	0.00375312	0.00411134	0.00667221	0.00376469	6	53289	0.0112594	0	53289	0	2	53289	0.00375312	0	53289	0	2	53289	0.00375312	1	53289	0.00187656	5	53289	0.0093828	4	53289	0.00750624	6	53289	0.0112594	0	53289	0	2	53289	0.00375312	4	53289	0.00750624	4	53289	0.00750624	6	53289	0.0112594
Pseudoleptotrichia	0.290348	0.00562968	0.00975089	0.000375312	0.000750624	0.00104253	0.00179364	0	53289	0	0	53289	0	0	53289	0	0	53289	0	1	53289	0.00187656	0	53289	0	0	53289	0	0	53289	0	0	53289	0	0	53289	0	1	53289	0.00187656	1	53289	0.00187656	3	53289	0.00562968	0	53289	0
Saccharopolyspora	0.308898	0.00562968	0.00975089	0.000375312	0.000750624	0.00125104	0.00197807	0	53289	0	1	53289	0.00187656	0	53289	0	0	53289	0	0	53289	0	0	53289	0	0	53289	0	0	53289	0	3	53289	0.00562968	1	53289	0.00187656	0	53289	0	0	53289	0	2	53289	0.00375312	0	53289	0
Sandaracinus	0.0288257	0.00562968	0.00351072	0.00150125	0.0030025	0.000834027	0.00128532	4	53289	0.00750624	0	53289	0	0	53289	0	0	53289	0	0	53289	0	0	53289	0	0	53289	0	0	53289	0	1	53289	0.00187656	0	53289	0	1	53289	0.00187656	0	53289	0	2	53289	0.00375312	0	53289	0
Shouchella	0.631864	0.00562968	0.00578395	0.00337781	0.00586256	0.00271059	0.00281291	0	53289	0	0	53289	0	0	53289	0	8	53289	0.0150125	1	53289	0.00187656	3	53289	0.00562968	0	53289	0	0	53289	0	0	53289	0	0	53289	0	2	53289	0.00375312	3	53289	0.00562968	1	53289	0.00187656	4	53289	0.00750624
Thermolithobacter	0.087991	0.00562968	0.00562968	0.00112594	0.000919323	0.00125104	0.00176924	1	53289	0.00187656	0	53289	0	1	53289	0.00187656	1	53289	0.00187656	0	53289	0	0	53289	0	0	53289	0	1	53289	0.00187656	3	53289	0.00562968	1	53289	0.00187656	0	53289	0	0	53289	0	0	53289	0	1	53289	0.00187656
Thermus	0.0205408	0.00562968	0.00547107	0.00150125	0.00140429	0	0	2	53289	0.00375312	1	53289	0.00187656	1	53289	0.00187656	0	53289	0	0	53289	0	0	53289	0	0	53289	0	0	53289	0	0	53289	0	0	53289	0	0	53289	0	0	53289	0	0	53289	0	0	53289	0
Actinobacillus	0.388391	0.00516054	0.00427407	0.00225187	0.0030025	0.00688072	0.00661988	4	53289	0.00750624	0	53289	0	0	53289	0	2	53289	0.00375312	0	53289	0	0	53289	0	1	53289	0.00187656	2	53289	0.00375312	3	53289	0.00562968	4	53289	0.00750624	3	53289	0.00562968	3	53289	0.00562968	4	53289	0.00750624	13	53289	0.0243953
Capillibacterium	0.792041	0.00516054	0.0061348	0.0030025	0.00191372	0.00688072	0.012353	0	53289	0	3	53289	0.00562968	1	53289	0.00187656	2	53289	0.00375312	2	53289	0.00375312	2	53289	0.00375312	4	53289	0.00750624	22	53289	0.0412843	1	53289	0.00187656	1	53289	0.00187656	0	53289	0	1	53289	0.00187656	0	53289	0	2	53289	0.00375312
Caproicibacterium	0.617568	0.00516054	0.00694264	0.00225187	0.0030025	0.00354461	0.00224569	4	53289	0.00750624	0	53289	0	0	53289	0	0	53289	0	2	53289	0.00375312	2	53289	0.00375312	1	53289	0.00187656	0	53289	0	3	53289	0.00562968	0	53289	0	3	53289	0.00562968	2	53289	0.00375312	3	53289	0.00562968	3	53289	0.00562968
Cuneatibacter	0.342165	0.00516054	0.00485282	0.00225187	0.00275797	0.00208507	0.00241364	0	53289	0	3	53289	0.00562968	0	53289	0	0	53289	0	3	53289	0.00562968	1	53289	0.00187656	0	53289	0	1	53289	0.00187656	4	53289	0.00750624	2	53289	0.00375312	0	53289	0	0	53289	0	2	53289	0.00375312	0	53289	0
Duodenibacillus	0.319443	0.00516054	0.00335033	0.00150125	0.00140429	0.0100083	0.0125728	2	53289	0.00375312	0	53289	0	1	53289	0.00187656	0	53289	0	1	53289	0.00187656	2	53289	0.00375312	1	53289	0.00187656	0	53289	0	1	53289	0.00187656	0	53289	0	19	53289	0.0356546	8	53289	0.0150125	15	53289	0.0281484	2	53289	0.00375312
Fusobacterium	0.38179	0.00516054	0.00485282	0.00187656	0.00205567	0.00562968	0.00508175	3	53289	0.00562968	0	53289	0	0	53289	0	1	53289	0.00187656	1	53289	0.00187656	4	53289	0.00750624	4	53289	0.00750624	9	53289	0.016889	1	53289	0.00187656	0	53289	0	2	53289	0.00375312	2	53289	0.00375312	5	53289	0.0093828	0	53289	0
Geothermobacter	0.336122	0.00516054	0.00243772	0.0063803	0.00421287	0.0114679	0.00954587	3	53289	0.00562968	3	53289	0.00562968	4	53289	0.00750624	0	53289	0	7	53289	0.0131359	7	53289	0.0131359	12	53289	0.0225187	6	53289	0.0112594	1	53289	0.00187656	17	53289	0.0319015	0	53289	0	5	53289	0.0093828	4	53289	0.00750624	3	53289	0.00562968
Gp5	0.598636	0.00516054	0.00384008	0.0030025	0.00254549	0.00250208	0.00459661	3	53289	0.00562968	2	53289	0.00375312	0	53289	0	3	53289	0.00562968	0	53289	0	2	53289	0.00375312	0	53289	0	1	53289	0.00187656	8	53289	0.0150125	1	53289	0.00187656	0	53289	0	0	53289	0	0	53289	0	0	53289	0
Heliorestis	0.638624	0.00516054	0.00520301	0.00225187	0.0030025	0.00375312	0.00414923	4	53289	0.00750624	0	53289	0	0	53289	0	2	53289	0.00375312	0	53289	0	0	53289	0	0	53289	0	6	53289	0.0112594	5	53289	0.0093828	1	53289	0.00187656	0	53289	0	1	53289	0.00187656	1	53289	0.00187656	4	53289	0.00750624
Henriciella	0.355198	0.00516054	0.00553108	0.0131359	0.0125603	0.00771475	0.00409651	4	53289	0.00750624	20	53289	0.0375312	4	53289	0.00750624	1	53289	0.00187656	6	53289	0.0112594	6	53289	0.0112594	5	53289	0.0093828	7	53289	0.0131359	0	53289	0	5	53289	0.0093828	2	53289	0.00375312	6	53289	0.0112594	4	53289	0.00750624	2	53289	0.00375312
Lebetimonas	0.0612481	0.00516054	0.00503097	0.000375312	0.000750624	0.00145955	0.00147436	0	53289	0	0	53289	0	0	53289	0	1	53289	0.00187656	0	53289	0	0	53289	0	0	53289	0	1	53289	0.00187656	2	53289	0.00375312	1	53289	0.00187656	0	53289	0	1	53289	0.00187656	0	53289	0	2	53289	0.00375312
Negativicoccus	0.145201	0.00516054	0.00681465	0	0	0.00145955	0.00171939	0	53289	0	0	53289	0	0	53289	0	0	53289	0	0	53289	0	0	53289	0	1	53289	0.00187656	2	53289	0.00375312	2	53289	0.00375312	0	53289	0	0	53289	0	2	53289	0.00375312	0	53289	0	0	53289	0
Nunduva	0.127928	0.00516054	0.00307636	0.000375312	0.000750624	0.00396163	0.00409651	0	53289	0	0	53289	0	0	53289	0	0	53289	0	1	53289	0.00187656	0	53289	0	0	53289	0	7	53289	0.0131359	2	53289	0.00375312	4	53289	0.00750624	0	53289	0	1	53289	0.00187656	3	53289	0.00562968	2	53289	0.00375312
Ohtaekwangia	0.31764	0.00516054	0.00584075	0.00112594	0.00225187	0.00291909	0.0025194	0	53289	0	0	53289	0	0	53289	0	0	53289	0	3	53289	0.00562968	0	53289	0	1	53289	0.00187656	2	53289	0.00375312	0	53289	0	2	53289	0.00375312	0	53289	0	2	53289	0.00375312	3	53289	0.00562968	4	53289	0.00750624
Petroclostridium	0.306233	0.00516054	0.00360353	0.00562968	0.00581431	0.00187656	0.00353848	8	53289	0.0150125	5	53289	0.0093828	2	53289	0.00375312	0	53289	0	0	53289	0	0	53289	0	0	53289	0	0	53289	0	6	53289	0.0112594	0	53289	0	1	53289	0.00187656	2	53289	0.00375312	0	53289	0	0	53289	0
Phocea	0.177	0.00516054	0.00447531	0.00225187	0.00218843	0.00854877	0.00668523	3	53289	0.00562968	1	53289	0.00187656	0	53289	0	2	53289	0.00375312	0	53289	0	1	53289	0.00187656	7	53289	0.0131359	13	53289	0.0243953	6	53289	0.0112594	4	53289	0.00750624	3	53289	0.00562968	2	53289	0.00375312	1	53289	0.00187656	4	53289	0.00750624
Povalibacter	0.194452	0.00516054	0.00893832	0	0	0.000208507	0.000589746	0	53289	0	0	53289	0	0	53289	0	0	53289	0	0	53289	0	0	53289	0	0	53289	0	0	53289	0	0	53289	0	0	53289	0	1	53289	0.00187656	0	53289	0	0	53289	0	0	53289	0
Pullulanibacillus	0.542717	0.00516054	0.00427407	0.00262718	0.00327189	0.00458715	0.00294873	4	53289	0.00750624	3	53289	0.00562968	0	53289	0	0	53289	0	0	53289	0	3	53289	0.00562968	3	53289	0.00562968	2	53289	0.00375312	2	53289	0.00375312	0	53289	0	0	53289	0	4	53289	0.00750624	5	53289	0.0093828	3	53289	0.00562968
Spongiimonas	0.119485	0.00516054	0.00384008	0.000375312	0.000750624	0.00396163	0.00369475	1	53289	0.00187656	0	53289	0	0	53289	0	0	53289	0	0	53289	0	1	53289	0.00187656	4	53289	0.00750624	4	53289	0.00750624	6	53289	0.0112594	2	53289	0.00375312	1	53289	0.00187656	0	53289	0	1	53289	0.00187656	0	53289	0
Sporosarcina	0.37701	0.00516054	0.00893832	0.000750624	0.00150125	0.00125104	0.00234048	2	53289	0.00375312	0	53289	0	0	53289	0	0	53289	0	0	53289	0	0	53289	0	0	53289	0	0	53289	0	4	53289	0.00750624	0	53289	0	1	53289	0.00187656	1	53289	0.00187656	0	53289	0	0	53289	0
Thermoflavimicrobium	0.381902	0.00516054	0.00307636	0.00187656	0.00237368	0.00646371	0.00691538	3	53289	0.00562968	0	53289	0	2	53289	0.00375312	0	53289	0	0	53289	0	13	53289	0.0243953	3	53289	0.00562968	3	53289	0.00562968	3	53289	0.00562968	0	53289	0	1	53289	0.00187656	4	53289	0.00750624	0	53289	0	4	53289	0.00750624
Thiomicrorhabdus	0.527188	0.00516054	0.0061348	0.00262718	0.00525437	0.00187656	0.00234048	7	53289	0.0131359	0	53289	0	0	53289	0	0	53289	0	0	53289	0	0	53289	0	4	53289	0.00750624	2	53289	0.00375312	0	53289	0	0	53289	0	1	53289	0.00187656	0	53289	0	1	53289	0.00187656	1	53289	0.00187656
Acetanaerobacterium	0.786023	0.0046914	0.00539001	0.0030025	0.00327189	0.00458715	0.00365928	5	53289	0.0093828	1	53289	0.00187656	1	53289	0.00187656	0	53289	0	1	53289	0.00187656	0	53289	0	1	53289	0.00187656	1	53289	0.00187656	4	53289	0.00750624	5	53289	0.0093828	2	53289	0.00375312	4	53289	0.00750624	5	53289	0.0093828	0	53289	0
Alishewanella	0.00271701	0.0046914	0.00338302	0	0	0.000417013	0.00078016	0	53289	0	0	53289	0	0	53289	0	0	53289	0	0	53289	0	1	53289	0.00187656	0	53289	0	0	53289	0	1	53289	0.00187656	0	53289	0	0	53289	0	0	53289	0	0	53289	0	0	53289	0
Bosea	0.164679	0.0046914	0.00429974	0.00262718	0.00367729	0.000834027	0.00128532	0	53289	0	5	53289	0.0093828	0	53289	0	2	53289	0.00375312	0	53289	0	0	53289	0	2	53289	0.00375312	0	53289	0	0	53289	0	0	53289	0	0	53289	0	0	53289	0	1	53289	0.00187656	1	53289	0.00187656
Cerasicoccus	0.499054	0.0046914	0.00615271	0.00675562	0.00600499	0.00271059	0.00493417	5	53289	0.0093828	0	53289	0	3	53289	0.00562968	9	53289	0.016889	1	53289	0.00187656	0	53289	0	0	53289	0	0	53289	0	0	53289	0	1	53289	0.00187656	8	53289	0.0150125	4	53289	0.00750624	0	53289	0	0	53289	0
Chlorarachniophyceae	0.0106706	0.0046914	0.00093828	0.00150125	0.0030025	0.00062552	0.000884619	4	53289	0.00750624	0	53289	0	0	53289	0	0	53289	0	0	53289	0	0	53289	0	1	53289	0.00187656	0	53289	0	1	53289	0.00187656	0	53289	0	0	53289	0	0	53289	0	1	53289	0.00187656	0	53289	0
Dermacoccus	0.405159	0.0046914	0.00812574	0	0	0.00437864	0.00580083	0	53289	0	0	53289	0	0	53289	0	0	53289	0	0	53289	0	3	53289	0.00562968	0	53289	0	0	53289	0	0	53289	0	0	53289	0	10	53289	0.0187656	1	53289	0.00187656	4	53289	0.00750624	3	53289	0.00562968
Desulforadius	0.490294	0.0046914	0.00281484	0.00375312	0.00581431	0.00187656	0.00250208	8	53289	0.0150125	2	53289	0.00375312	0	53289	0	0	53289	0	0	53289	0	2	53289	0.00375312	0	53289	0	1	53289	0.00187656	4	53289	0.00750624	0	53289	0	0	53289	0	0	53289	0	2	53289	0.00375312	0	53289	0
Fudania	0.246026	0.0046914	0.00408987	0.00487906	0.00600499	0.00125104	0.00176924	0	53289	0	0	53289	0	0	53289	0	6	53289	0.0112594	7	53289	0.0131359	1	53289	0.00187656	0	53289	0	0	53289	0	3	53289	0.00562968	0	53289	0	0	53289	0	0	53289	0	1	53289	0.00187656	1	53289	0.00187656
Fusibacter	0.256676	0.0046914	0.00338302	0.00337781	0.00275797	0.0112594	0.0112594	4	53289	0.00750624	0	53289	0	1	53289	0.00187656	1	53289	0.00187656	3	53289	0.00562968	19	53289	0.0356546	2	53289	0.00375312	4	53289	0.00750624	3	53289	0.00562968	0	53289	0	5	53289	0.0093828	14	53289	0.0262718	6	53289	0.0112594	1	53289	0.00187656
Gemella	0.580119	0.0046914	0.00311192	0.00225187	0.00363878	0.00479565	0.00469024	5	53289	0.0093828	1	53289	0.00187656	0	53289	0	0	53289	0	0	53289	0	0	53289	0	3	53289	0.00562968	0	53289	0	3	53289	0.00562968	4	53289	0.00750624	0	53289	0	1	53289	0.00187656	8	53289	0.0150125	4	53289	0.00750624
Gp15	0.0226416	0.0046914	0.00093828	0.000750624	0.000919323	0.00688072	0.00442309	1	53289	0.00187656	0	53289	0	1	53289	0.00187656	0	53289	0	0	53289	0	0	53289	0	5	53289	0.0093828	6	53289	0.0112594	2	53289	0.00375312	2	53289	0.00375312	6	53289	0.0112594	4	53289	0.00750624	1	53289	0.00187656	7	53289	0.0131359
Haemophilus	0.349057	0.0046914	0.00812574	0	0	0.00229357	0.00262089	0	53289	0	0	53289	0	0	53289	0	0	53289	0	0	53289	0	1	53289	0.00187656	0	53289	0	0	53289	0	4	53289	0.00750624	0	53289	0	1	53289	0.00187656	0	53289	0	3	53289	0.00562968	2	53289	0.00375312
Harryflintia	0.146064	0.0046914	0.00386863	0.0210175	0.0172153	0.0273144	0.0191803	15	53289	0.0281484	3	53289	0.00562968	2	53289	0.00375312	9	53289	0.016889	27	53289	0.0506671	7	53289	0.0131359	38	53289	0.0713093	26	53289	0.0487906	7	53289	0.0131359	12	53289	0.0225187	4	53289	0.00750624	12	53289	0.0225187	10	53289	0.0187656	15	53289	0.0281484
Ilumatobacter	0.0829483	0.0046914	0.00281484	0.0030025	0.00280858	0.00104253	0.00179364	0	53289	0	2	53289	0.00375312	0	53289	0	4	53289	0.00750624	2	53289	0.00375312	0	53289	0	0	53289	0	0	53289	0	3	53289	0.00562968	0	53289	0	0	53289	0	1	53289	0.00187656	0	53289	0	1	53289	0.00187656
Insolitispirillum	0.438876	0.0046914	0.00539001	0.00487906	0.00386407	0.0112594	0.0126039	2	53289	0.00375312	0	53289	0	5	53289	0.0093828	5	53289	0.0093828	1	53289	0.00187656	0	53289	0	17	53289	0.0319015	0	53289	0	18	53289	0.0337781	8	53289	0.0150125	0	53289	0	6	53289	0.0112594	4	53289	0.00750624	1	53289	0.00187656
Maledivibacter	0.688251	0.0046914	0.00386863	0.00788155	0.0121846	0.00417013	0.00340064	17	53289	0.0319015	3	53289	0.00562968	1	53289	0.00187656	0	53289	0	0	53289	0	3	53289	0.00562968	4	53289	0.00750624	0	53289	0	0	53289	0	0	53289	0	1	53289	0.00187656	4	53289	0.00750624	4	53289	0.00750624	4	53289	0.00750624
Rheinheimera	0.515001	0.0046914	0.00708386	0.00150125	0.00140429	0.00271059	0.00199993	2	53289	0.00375312	0	53289	0	1	53289	0.00187656	1	53289	0.00187656	0	53289	0	2	53289	0.00375312	0	53289	0	0	53289	0	3	53289	0.00562968	1	53289	0.00187656	3	53289	0.00562968	1	53289	0.00187656	1	53289	0.00187656	2	53289	0.00375312
Spongitalea	0.159264	0.0046914	0.00487545	0.000375312	0.000750624	0.00333611	0.00276615	0	53289	0	1	53289	0.00187656	0	53289	0	0	53289	0	0	53289	0	0	53289	0	2	53289	0.00375312	1	53289	0.00187656	5	53289	0.0093828	2	53289	0.00375312	0	53289	0	1	53289	0.00187656	3	53289	0.00562968	2	53289	0.00375312
Thermodesulfovibrio	0.145069	0.0046914	0.00386863	0.00150125	0.00218843	0.00166805	0.00138308	3	53289	0.00562968	0	53289	0	0	53289	0	0	53289	0	1	53289	0.00187656	1	53289	0.00187656	2	53289	0.00375312	0	53289	0	1	53289	0.00187656	1	53289	0.00187656	2	53289	0.00375312	0	53289	0	1	53289	0.00187656	0	53289	0
Turicibacter	0.835289	0.0046914	0.0046914	0.00375312	0.00489347	0.00291909	0.00425272	7	53289	0.0131359	2	53289	0.00375312	0	53289	0	0	53289	0	1	53289	0.00187656	0	53289	0	1	53289	0.00187656	0	53289	0	4	53289	0.00750624	0	53289	0	1	53289	0.00187656	1	53289	0.00187656	0	53289	0	7	53289	0.0131359
Actinotignum	0.0664511	0.00422226	0.00307636	0.000750624	0.00150125	0.00145955	0.00147436	2	53289	0.00375312	0	53289	0	0	53289	0	0	53289	0	0	53289	0	0	53289	0	1	53289	0.00187656	1	53289	0.00187656	0	53289	0	2	53289	0.00375312	1	53289	0.00187656	0	53289	0	0	53289	0	2	53289	0.00375312
Aerofilum	0.00503102	0.00422226	0.00277547	0.000750624	0.00150125	0.000208507	0.000589746	2	53289	0.00375312	0	53289	0	0	53289	0	0	53289	0	0	53289	0	0	53289	0	0	53289	0	0	53289	0	0	53289	0	0	53289	0	0	53289	0	0	53289	0	1	53289	0.00187656	0	53289	0
Aquicella	0.582157	0.00422226	0.00406287	0.000750624	0.000919323	0.0154295	0.0344295	1	53289	0.00187656	0	53289	0	0	53289	0	0	53289	0	1	53289	0.00187656	0	53289	0	2	53289	0.00375312	2	53289	0.00375312	2	53289	0.00375312	0	53289	0	60	53289	0.112594	1	53289	0.00187656	3	53289	0.00562968	4	53289	0.00750624
Botrimarina	0.519598	0.00422226	0.00627667	0.0183903	0.0293944	0.0129274	0.00704617	1	53289	0.00187656	3	53289	0.00562968	0	53289	0	4	53289	0.00750624	41	53289	0.076939	11	53289	0.0206422	3	53289	0.00562968	7	53289	0.0131359	15	53289	0.0281484	2	53289	0.00375312	6	53289	0.0112594	7	53289	0.0131359	6	53289	0.0112594	5	53289	0.0093828
Brevibacillus	0.231333	0.00422226	0.00627667	0.000375312	0.000750624	0.00104253	0.00128532	0	53289	0	1	53289	0.00187656	0	53289	0	0	53289	0	0	53289	0	1	53289	0.00187656	0	53289	0	0	53289	0	2	53289	0.00375312	0	53289	0	0	53289	0	1	53289	0.00187656	1	53289	0.00187656	0	53289	0
Caecibacterium	0.291312	0.00422226	0.00335033	0.0030025	0.00225187	0.00646371	0.00425272	3	53289	0.00562968	1	53289	0.00187656	0	53289	0	3	53289	0.00562968	1	53289	0.00187656	4	53289	0.00750624	4	53289	0.00750624	3	53289	0.00562968	3	53289	0.00562968	9	53289	0.016889	3	53289	0.00562968	2	53289	0.00375312	3	53289	0.00562968	0	53289	0
Cloacibacterium	0.317843	0.00422226	0.00627667	0.000750624	0.00150125	0.00104253	0.00199993	0	53289	0	0	53289	0	0	53289	0	2	53289	0.00375312	0	53289	0	0	53289	0	0	53289	0	0	53289	0	0	53289	0	0	53289	0	0	53289	0	0	53289	0	2	53289	0.00375312	3	53289	0.00562968
Desulfotomaculum	0.0672423	0.00422226	0.00406287	0.000750624	0.000919323	0.00104253	0.00093247	1	53289	0.00187656	0	53289	0	1	53289	0.00187656	0	53289	0	0	53289	0	0	53289	0	0	53289	0	0	53289	0	1	53289	0.00187656	1	53289	0.00187656	1	53289	0.00187656	1	53289	0.00187656	0	53289	0	1	53289	0.00187656
Gemmatimonas	0.0440268	0.00422226	0.00427407	0	0	0.00125104	0.000884619	0	53289	0	0	53289	0	0	53289	0	0	53289	0	0	53289	0	1	53289	0.00187656	0	53289	0	1	53289	0.00187656	0	53289	0	0	53289	0	1	53289	0.00187656	1	53289	0.00187656	1	53289	0.00187656	1	53289	0.00187656
Johnsonella	0.147473	0.00422226	0.00427407	0.00112594	0.00150125	0.00104253	0.00156032	2	53289	0.00375312	1	53289	0.00187656	0	53289	0	0	53289	0	0	53289	0	2	53289	0.00375312	2	53289	0.00375312	0	53289	0	0	53289	0	1	53289	0.00187656	0	53289	0	0	53289	0	0	53289	0	0	53289	0
Laspinema	0.0302426	0.00422226	0.00335033	0.00187656	0.00237368	0.000208507	0.000589746	3	53289	0.00562968	2	53289	0.00375312	0	53289	0	0	53289	0	0	53289	0	0	53289	0	0	53289	0	0	53289	0	0	53289	0	1	53289	0.00187656	0	53289	0	0	53289	0	0	53289	0	0	53289	0
Meniscus	0.0955203	0.00422226	0.00360353	0.000375312	0.000750624	0.00187656	0.00197807	0	53289	0	1	53289	0.00187656	0	53289	0	0	53289	0	0	53289	0	0	53289	0	3	53289	0.00562968	2	53289	0.00375312	1	53289	0.00187656	2	53289	0.00375312	0	53289	0	1	53289	0.00187656	0	53289	0	0	53289	0
Nautilia	0.138493	0.00422226	0.00243772	0.00150125	0.00140429	0.00354461	0.00186494	0	53289	0	1	53289	0.00187656	0	53289	0	2	53289	0.00375312	1	53289	0.00187656	3	53289	0.00562968	2	53289	0.00375312	1	53289	0.00187656	3	53289	0.00562968	2	53289	0.00375312	1	53289	0.00187656	2	53289	0.00375312	0	53289	0	3	53289	0.00562968
Nocardioides	0.463547	0.00422226	0.00466788	0.00375312	0.00314009	0.00187656	0.00234048	5	53289	0.0093828	0	53289	0	2	53289	0.00375312	1	53289	0.00187656	2	53289	0.00375312	3	53289	0.00562968	2	53289	0.00375312	0	53289	0	0	53289	0	0	53289	0	0	53289	0	0	53289	0	1	53289	0.00187656	3	53289	0.00562968
Posidoniimonas	0.948718	0.00422226	0.00277547	0.00412843	0.0030025	0.00479565	0.00443291	3	53289	0.00562968	5	53289	0.0093828	1	53289	0.00187656	1	53289	0.00187656	1	53289	0.00187656	3	53289	0.00562968	4	53289	0.00750624	3	53289	0.00562968	0	53289	0	8	53289	0.0150125	1	53289	0.00187656	1	53289	0.00187656	0	53289	0	3	53289	0.00562968
Roseisolibacter	0.0493111	0.00422226	0.00335033	0.00112594	0.00225187	0.000417013	0.00117949	0	53289	0	0	53289	0	0	53289	0	3	53289	0.00562968	0	53289	0	0	53289	0	0	53289	0	0	53289	0	2	53289	0.00375312	0	53289	0	0	53289	0	0	53289	0	0	53289	0	0	53289	0
Serratia	0.290231	0.00422226	0.00731317	0.000750624	0.00150125	0.000417013	0.00117949	0	53289	0	2	53289	0.00375312	0	53289	0	0	53289	0	0	53289	0	0	53289	0	0	53289	0	0	53289	0	0	53289	0	0	53289	0	2	53289	0.00375312	0	53289	0	0	53289	0	0	53289	0
Tepidibaculum	0.092714	0.00422226	0.00466788	0.00525437	0.00218843	0.00875728	0.00306441	4	53289	0.00750624	4	53289	0.00750624	2	53289	0.00375312	3	53289	0.00562968	1	53289	0.00187656	1	53289	0.00187656	5	53289	0.0093828	5	53289	0.0093828	4	53289	0.00750624	4	53289	0.00750624	7	53289	0.0131359	6	53289	0.0112594	6	53289	0.0112594	4	53289	0.00750624
Verticiella	0.962478	0.00422226	0.00731317	0.00375312	0.00237368	0.00458715	0.00469024	0	53289	0	3	53289	0.00562968	3	53289	0.00562968	3	53289	0.00562968	1	53289	0.00187656	0	53289	0	7	53289	0.0131359	5	53289	0.0093828	5	53289	0.0093828	0	53289	0	1	53289	0.00187656	3	53289	0.00562968	0	53289	0	1	53289	0.00187656
Acidilutibacter	0.216057	0.00375312	0.00187656	0.00112594	0.000919323	0.00291909	0.0025194	1	53289	0.00187656	1	53289	0.00187656	0	53289	0	0	53289	0	1	53289	0.00187656	0	53289	0	1	53289	0.00187656	1	53289	0.00187656	5	53289	0.0093828	1	53289	0.00187656	1	53289	0.00187656	1	53289	0.00187656	2	53289	0.00375312	2	53289	0.00375312
Alterococcus	0.451631	0.00375312	0.00398078	0.00187656	0.00118684	0.00500416	0.00484526	1	53289	0.00187656	2	53289	0.00375312	0	53289	0	1	53289	0.00187656	1	53289	0.00187656	0	53289	0	0	53289	0	4	53289	0.00750624	5	53289	0.0093828	5	53289	0.0093828	3	53289	0.00562968	0	53289	0	0	53289	0	7	53289	0.0131359
Anaeromonas	0.412506	0.00375312	0.00132693	0.00112594	0.00150125	0.00229357	0.00340064	0	53289	0	0	53289	0	0	53289	0	1	53289	0.00187656	2	53289	0.00375312	1	53289	0.00187656	1	53289	0.00187656	0	53289	0	0	53289	0	1	53289	0.00187656	0	53289	0	0	53289	0	2	53289	0.00375312	6	53289	0.0112594
Anaerosoma	0.0325987	0.00375312	0.00187656	0.0030025	0.00386407	0	0	0	53289	0	5	53289	0.0093828	0	53289	0	3	53289	0.00562968	0	53289	0	0	53289	0	0	53289	0	0	53289	0	0	53289	0	0	53289	0	0	53289	0	0	53289	0	0	53289	0	0	53289	0
Anaerosporomusa	0.270975	0.00375312	0.0029671	0.00187656	0.00290715	0.00125104	0.00125104	4	53289	0.00750624	0	53289	0	0	53289	0	0	53289	0	1	53289	0.00187656	1	53289	0.00187656	1	53289	0.00187656	0	53289	0	2	53289	0.00375312	1	53289	0.00187656	0	53289	0	0	53289	0	0	53289	0	1	53289	0.00187656
Caldinitratiruptor	0.481738	0.00375312	0.0029671	0.00112594	0.00150125	0.00375312	0.00468096	0	53289	0	1	53289	0.00187656	0	53289	0	0	53289	0	2	53289	0.00375312	0	53289	0	1	53289	0.00187656	3	53289	0.00562968	8	53289	0.0150125	1	53289	0.00187656	4	53289	0.00750624	1	53289	0.00187656	0	53289	0	0	53289	0
Croceivirga	0.152732	0.00375312	0.0029671	0	0	0.00125104	0.00293395	0	53289	0	0	53289	0	0	53289	0	0	53289	0	0	53289	0	0	53289	0	0	53289	0	0	53289	0	5	53289	0.0093828	0	53289	0	1	53289	0.00187656	0	53289	0	0	53289	0	0	53289	0
Desulfofundulus	0.0120096	0.00375312	0.0029671	0	0	0.000417013	0.00117949	0	53289	0	0	53289	0	0	53289	0	0	53289	0	0	53289	0	0	53289	0	0	53289	0	2	53289	0.00375312	0	53289	0	0	53289	0	0	53289	0	0	53289	0	0	53289	0	0	53289	0
Desulfurispora	0.215867	0.00375312	0.00459661	0.0093828	0.0132161	0.00104253	0.00179364	7	53289	0.0131359	18	53289	0.0337781	0	53289	0	0	53289	0	0	53289	0	1	53289	0.00187656	0	53289	0	0	53289	0	3	53289	0.00562968	1	53289	0.00187656	0	53289	0	0	53289	0	0	53289	0	0	53289	0
Falcatimonas	0.762806	0.00375312	0.0029671	0.0063803	0.00600499	0.00583819	0.0052666	9	53289	0.016889	5	53289	0.0093828	1	53289	0.00187656	1	53289	0.00187656	1	53289	0.00187656	0	53289	0	3	53289	0.00562968	1	53289	0.00187656	9	53289	0.016889	5	53289	0.0093828	1	53289	0.00187656	2	53289	0.00375312	1	53289	0.00187656	6	53289	0.0112594
Gp16	0.36348	0.00375312	0.00229831	0.00150125	0.0030025	0.00208507	0.00138308	0	53289	0	0	53289	0	0	53289	0	4	53289	0.00750624	0	53289	0	0	53289	0	1	53289	0.00187656	2	53289	0.00375312	0	53289	0	2	53289	0.00375312	2	53289	0.00375312	1	53289	0.00187656	1	53289	0.00187656	1	53289	0.00187656
Mariniflexile	0.198759	0.00375312	0.00187656	0.00375312	0.00569189	0.00062552	0.000884619	1	53289	0.00187656	8	53289	0.0150125	0	53289	0	0	53289	0	1	53289	0.00187656	0	53289	0	0	53289	0	0	53289	0	1	53289	0.00187656	0	53289	0	1	53289	0.00187656	1	53289	0.00187656	0	53289	0	0	53289	0
Nakamurella	0.108309	0.00375312	0.0029671	0.00337781	0.00509098	0	0	2	53289	0.00375312	0	53289	0	0	53289	0	0	53289	0	7	53289	0.0131359	0	53289	0	0	53289	0	0	53289	0	0	53289	0	0	53289	0	0	53289	0	0	53289	0	0	53289	0	0	53289	0
Nitrospira	0.0746474	0.00375312	0.00459661	0.000750624	0.00150125	0	0	0	53289	0	0	53289	0	0	53289	0	0	53289	0	2	53289	0.00375312	0	53289	0	0	53289	0	0	53289	0	0	53289	0	0	53289	0	0	53289	0	0	53289	0	0	53289	0	0	53289	0
Novosphingobium	0.186914	0.00375312	0.00229831	0.00225187	0.00275797	0.00708923	0.00550868	1	53289	0.00187656	0	53289	0	1	53289	0.00187656	0	53289	0	4	53289	0.00750624	0	53289	0	6	53289	0.0112594	9	53289	0.016889	3	53289	0.00562968	7	53289	0.0131359	5	53289	0.0093828	2	53289	0.00375312	1	53289	0.00187656	1	53289	0.00187656
Oceaniferula	0.0172149	0.00375312	0.00265386	0.000375312	0.000750624	0.00062552	0.00125104	0	53289	0	0	53289	0	0	53289	0	1	53289	0.00187656	0	53289	0	0	53289	0	0	53289	0	0	53289	0	0	53289	0	2	53289	0.00375312	0	53289	0	0	53289	0	0	53289	0	1	53289	0.00187656
Putridiphycobacter	0.506056	0.00375312	0.00459661	0.00375312	0.00660805	0.00729773	0.00569494	0	53289	0	1	53289	0.00187656	0	53289	0	0	53289	0	9	53289	0.016889	0	53289	0	9	53289	0.016889	6	53289	0.0112594	1	53289	0.00187656	5	53289	0.0093828	2	53289	0.00375312	2	53289	0.00375312	8	53289	0.0150125	2	53289	0.00375312
Rikenella	0.717527	0.00375312	0.00650059	0.00600499	0.0046575	0.00417013	0.00212636	7	53289	0.0131359	1	53289	0.00187656	4	53289	0.00750624	0	53289	0	4	53289	0.00750624	0	53289	0	2	53289	0.00375312	1	53289	0.00187656	3	53289	0.00562968	4	53289	0.00750624	2	53289	0.00375312	3	53289	0.00562968	3	53289	0.00562968	2	53289	0.00375312
Tellurimicrobium	0.864362	0.00375312	0.00351072	0.00450374	0.00810187	0.0062552	0.00871248	1	53289	0.00187656	0	53289	0	0	53289	0	11	53289	0.0206422	0	53289	0	0	53289	0	2	53289	0.00375312	16	53289	0.030025	2	53289	0.00375312	3	53289	0.00562968	2	53289	0.00375312	1	53289	0.00187656	4	53289	0.00750624	0	53289	0
WPS_2_genera_incertae_sedis	0.414884	0.00375312	0.00650059	0.000750624	0.00150125	0.00500416	0.00566432	0	53289	0	0	53289	0	0	53289	0	2	53289	0.00375312	0	53289	0	2	53289	0.00375312	1	53289	0.00187656	8	53289	0.0150125	0	53289	0	8	53289	0.0150125	3	53289	0.00562968	2	53289	0.00375312	0	53289	0	0	53289	0
Xanthomonas	0.406694	0.00375312	0.00440092	0.00150125	0.00183865	0.00125104	0.00234048	2	53289	0.00375312	2	53289	0.00375312	0	53289	0	0	53289	0	0	53289	0	0	53289	0	0	53289	0	0	53289	0	3	53289	0.00562968	0	53289	0	0	53289	0	0	53289	0	3	53289	0.00562968	0	53289	0
Agromyces	0.476304	0.00328398	0.00277547	0.00562968	0.00949473	0.0127189	0.0166623	0	53289	0	0	53289	0	2	53289	0.00375312	0	53289	0	13	53289	0.0243953	30	53289	0.0562968	4	53289	0.00750624	0	53289	0	0	53289	0	1	53289	0.00187656	10	53289	0.0187656	4	53289	0.00750624	3	53289	0.00562968	9	53289	0.016889
Chryseomonas	0.0348548	0.00328398	0.00277547	0.00112594	0.000919323	0.000417013	0.00078016	0	53289	0	1	53289	0.00187656	1	53289	0.00187656	1	53289	0.00187656	0	53289	0	0	53289	0	0	53289	0	1	53289	0.00187656	1	53289	0.00187656	0	53289	0	0	53289	0	0	53289	0	0	53289	0	0	53289	0
Citrobacter	0.284084	0.00328398	0.00243772	0.000375312	0.000750624	0.00208507	0.00299263	0	53289	0	0	53289	0	1	53289	0.00187656	0	53289	0	0	53289	0	0	53289	0	2	53289	0.00375312	0	53289	0	5	53289	0.0093828	0	53289	0	0	53289	0	0	53289	0	1	53289	0.00187656	2	53289	0.00375312
Cloacibacillus	0.347002	0.00328398	0.00155596	0.00112594	0.00225187	0.00458715	0.00493417	3	53289	0.00562968	0	53289	0	0	53289	0	0	53289	0	0	53289	0	0	53289	0	0	53289	0	6	53289	0.0112594	0	53289	0	0	53289	0	2	53289	0.00375312	6	53289	0.0112594	2	53289	0.00375312	6	53289	0.0112594
Defluviitalea	0.0487571	0.00328398	0.00243772	0.000375312	0.000750624	0.00104253	0.00128532	1	53289	0.00187656	0	53289	0	0	53289	0	0	53289	0	0	53289	0	1	53289	0.00187656	0	53289	0	0	53289	0	1	53289	0.00187656	0	53289	0	0	53289	0	0	53289	0	2	53289	0.00375312	1	53289	0.00187656
Desulfobotulus	0.85233	0.00328398	0.00568802	0.00225187	0.00183865	0.00208507	0.00224569	2	53289	0.00375312	2	53289	0.00375312	2	53289	0.00375312	0	53289	0	0	53289	0	1	53289	0.00187656	4	53289	0.00750624	1	53289	0.00187656	0	53289	0	1	53289	0.00187656	2	53289	0.00375312	1	53289	0.00187656	0	53289	0	0	53289	0
Desulfocella	0.135087	0.00328398	0.00360353	0	0	0.00104253	0.00179364	0	53289	0	0	53289	0	0	53289	0	0	53289	0	0	53289	0	0	53289	0	0	53289	0	1	53289	0.00187656	0	53289	0	1	53289	0.00187656	3	53289	0.00562968	0	53289	0	0	53289	0	0	53289	0
Gemmiger	0.248896	0.00328398	0.00204493	0.00225187	0.00275797	0.00750624	0.00718668	0	53289	0	0	53289	0	1	53289	0.00187656	1	53289	0.00187656	4	53289	0.00750624	2	53289	0.00375312	5	53289	0.0093828	1	53289	0.00187656	11	53289	0.0206422	0	53289	0	4	53289	0.00750624	3	53289	0.00562968	10	53289	0.0187656	0	53289	0
Geofilum	0.318679	0.00328398	0.00466788	0.00112594	0.00150125	0.00500416	0.00468096	0	53289	0	2	53289	0.00375312	0	53289	0	0	53289	0	1	53289	0.00187656	0	53289	0	2	53289	0.00375312	1	53289	0.00187656	1	53289	0.00187656	8	53289	0.0150125	6	53289	0.0112594	1	53289	0.00187656	2	53289	0.00375312	3	53289	0.00562968
Gp18	0.546546	0.00328398	0.00360353	0	0	0.00271059	0.00594153	0	53289	0	0	53289	0	0	53289	0	0	53289	0	0	53289	0	0	53289	0	0	53289	0	0	53289	0	0	53289	0	0	53289	0	0	53289	0	10	53289	0.0187656	0	53289	0	3	53289	0.00562968
Hypericibacter	0.289037	0.00328398	0.00277547	0.00788155	0.0103057	0.00187656	0.00318954	2	53289	0.00375312	15	53289	0.0281484	0	53289	0	3	53289	0.00562968	1	53289	0.00187656	3	53289	0.00562968	0	53289	0	0	53289	0	1	53289	0.00187656	5	53289	0.0093828	0	53289	0	0	53289	0	0	53289	0	0	53289	0
Inquilinus	0.274663	0.00328398	0.00384008	0	0	0.00813176	0.0112246	0	53289	0	0	53289	0	0	53289	0	0	53289	0	0	53289	0	0	53289	0	15	53289	0.0281484	15	53289	0.0281484	6	53289	0.0112594	1	53289	0.00187656	0	53289	0	0	53289	0	2	53289	0.00375312	0	53289	0
Klebsiella	0.256024	0.00328398	0.00277547	0.00187656	0.00205567	0.0104253	0.0124197	0	53289	0	0	53289	0	3	53289	0.00562968	1	53289	0.00187656	1	53289	0.00187656	1	53289	0.00187656	0	53289	0	2	53289	0.00375312	6	53289	0.0112594	1	53289	0.00187656	13	53289	0.0243953	21	53289	0.0394078	2	53289	0.00375312	4	53289	0.00750624
Leadbetterella	0.0540073	0.00328398	0.00204493	0	0	0.00145955	0.00193361	0	53289	0	0	53289	0	0	53289	0	0	53289	0	0	53289	0	0	53289	0	0	53289	0	1	53289	0.00187656	0	53289	0	0	53289	0	2	53289	0.00375312	3	53289	0.00562968	0	53289	0	1	53289	0.00187656
Lentisphaera	0.338631	0.00328398	0.00335033	0.000750624	0.000919323	0.00229357	0.00230303	1	53289	0.00187656	0	53289	0	1	53289	0.00187656	0	53289	0	0	53289	0	0	53289	0	0	53289	0	3	53289	0.00562968	0	53289	0	1	53289	0.00187656	3	53289	0.00562968	2	53289	0.00375312	0	53289	0	2	53289	0.00375312
Lutispora	0.849247	0.00328398	0.00568802	0.00187656	0.00290715	0.00250208	0.00176924	0	53289	0	4	53289	0.00750624	0	53289	0	1	53289	0.00187656	0	53289	0	0	53289	0	1	53289	0.00187656	0	53289	0	1	53289	0.00187656	3	53289	0.00562968	1	53289	0.00187656	2	53289	0.00375312	2	53289	0.00375312	2	53289	0.00375312
Mangroviflexus	0.102477	0.00328398	0.00277547	0.00112594	0.00150125	0.00062552	0.00125104	1	53289	0.00187656	2	53289	0.00375312	0	53289	0	0	53289	0	0	53289	0	0	53289	0	0	53289	0	0	53289	0	2	53289	0.00375312	0	53289	0	1	53289	0.00187656	0	53289	0	0	53289	0	0	53289	0
Mannheimia	0.652618	0.00328398	0.00568802	0.00187656	0.00237368	0.0293994	0.078542	3	53289	0.00562968	0	53289	0	0	53289	0	2	53289	0.00375312	0	53289	0	0	53289	0	0	53289	0	0	53289	0	0	53289	0	3	53289	0.00562968	134	53289	0.251459	1	53289	0.00187656	0	53289	0	3	53289	0.00562968
Marinifilum	0.820924	0.00328398	0.00384008	0.00187656	0.00237368	0.00271059	0.00307856	0	53289	0	0	53289	0	0	53289	0	2	53289	0.00375312	3	53289	0.00562968	1	53289	0.00187656	5	53289	0.0093828	0	53289	0	2	53289	0.00375312	2	53289	0.00375312	3	53289	0.00562968	0	53289	0	0	53289	0	0	53289	0
Mesobacillus	0.16478	0.00328398	0.00335033	0.00112594	0.00150125	0.000834027	0.00093247	2	53289	0.00375312	0	53289	0	0	53289	0	0	53289	0	1	53289	0.00187656	0	53289	0	0	53289	0	0	53289	0	1	53289	0.00187656	0	53289	0	0	53289	0	1	53289	0.00187656	1	53289	0.00187656	1	53289	0.00187656
Mesomycoplasma	0.332752	0.00328398	0.00155596	0.00187656	0.00290715	0.00771475	0.00912678	4	53289	0.00750624	0	53289	0	1	53289	0.00187656	0	53289	0	0	53289	0	0	53289	0	5	53289	0.0093828	3	53289	0.00562968	0	53289	0	3	53289	0.00562968	17	53289	0.0319015	2	53289	0.00375312	2	53289	0.00375312	5	53289	0.0093828
Mycoplasmopsis	0.0244155	0.00328398	0.00243772	0	0	0.00104253	0.00128532	0	53289	0	0	53289	0	0	53289	0	0	53289	0	0	53289	0	0	53289	0	0	53289	0	1	53289	0.00187656	0	53289	0	1	53289	0.00187656	0	53289	0	2	53289	0.00375312	1	53289	0.00187656	0	53289	0
Oceanipulchritudo	0.231534	0.00328398	0.00466788	0.00187656	0.00237368	0.00667221	0.00546112	3	53289	0.00562968	0	53289	0	2	53289	0.00375312	0	53289	0	0	53289	0	1	53289	0.00187656	8	53289	0.0150125	1	53289	0.00187656	2	53289	0.00375312	2	53289	0.00375312	9	53289	0.016889	3	53289	0.00562968	5	53289	0.0093828	1	53289	0.00187656
Pelotomaculum	0.788619	0.00328398	0.00335033	0.00225187	0.0030025	0.00208507	0.00206411	4	53289	0.00750624	2	53289	0.00375312	0	53289	0	0	53289	0	0	53289	0	0	53289	0	0	53289	0	3	53289	0.00562968	1	53289	0.00187656	1	53289	0.00187656	3	53289	0.00562968	1	53289	0.00187656	0	53289	0	1	53289	0.00187656
Pseudarthrobacter	0.0873352	0.00328398	0.00384008	0.000375312	0.000750624	0.000417013	0.00078016	1	53289	0.00187656	0	53289	0	0	53289	0	0	53289	0	0	53289	0	0	53289	0	0	53289	0	0	53289	0	0	53289	0	0	53289	0	1	53289	0.00187656	0	53289	0	1	53289	0.00187656	0	53289	0
Psittacicella	0.13243	0.00328398	0.00384008	0.00150125	0.00218843	0.000208507	0.000589746	1	53289	0.00187656	3	53289	0.00562968	0	53289	0	0	53289	0	0	53289	0	0	53289	0	0	53289	0	0	53289	0	0	53289	0	0	53289	0	0	53289	0	0	53289	0	0	53289	0	1	53289	0.00187656
Roseomonas	0.051392	0.00328398	0.00155596	0.000750624	0.000919323	0.00104253	0.00156032	0	53289	0	1	53289	0.00187656	0	53289	0	0	53289	0	1	53289	0.00187656	0	53289	0	2	53289	0.00375312	0	53289	0	0	53289	0	0	53289	0	0	53289	0	0	53289	0	2	53289	0.00375312	1	53289	0.00187656
Salsipaludibacter	0.0114759	0.00328398	0.00243772	0	0	0.000834027	0.00093247	0	53289	0	0	53289	0	0	53289	0	0	53289	0	0	53289	0	1	53289	0.00187656	0	53289	0	0	53289	0	0	53289	0	1	53289	0.00187656	1	53289	0.00187656	0	53289	0	0	53289	0	1	53289	0.00187656
Seonamhaeicola	0.169266	0.00328398	0.00204493	0	0	0.00333611	0.00383335	0	53289	0	0	53289	0	0	53289	0	0	53289	0	0	53289	0	0	53289	0	4	53289	0.00750624	1	53289	0.00187656	3	53289	0.00562968	6	53289	0.0112594	2	53289	0.00375312	0	53289	0	0	53289	0	0	53289	0
Sphingobium	0.480639	0.00328398	0.00243772	0.00713093	0.00322856	0.00562968	0.00523348	3	53289	0.00562968	2	53289	0.00375312	7	53289	0.0131359	3	53289	0.00562968	4	53289	0.00750624	3	53289	0.00562968	7	53289	0.0131359	8	53289	0.0150125	0	53289	0	4	53289	0.00750624	0	53289	0	2	53289	0.00375312	3	53289	0.00562968	0	53289	0
Spiroplasma	0.0828668	0.00328398	0.00466788	0.00375312	0.00205567	0.00834027	0.00415969	3	53289	0.00562968	2	53289	0.00375312	3	53289	0.00562968	2	53289	0.00375312	0	53289	0	4	53289	0.00750624	3	53289	0.00562968	1	53289	0.00187656	6	53289	0.0112594	5	53289	0.0093828	7	53289	0.0131359	1	53289	0.00187656	7	53289	0.0131359	6	53289	0.0112594
Streptomyces	0.741675	0.00328398	0.00204493	0.00187656	0.00205567	0.00250208	0.00279741	0	53289	0	3	53289	0.00562968	0	53289	0	1	53289	0.00187656	1	53289	0.00187656	1	53289	0.00187656	1	53289	0.00187656	0	53289	0	1	53289	0.00187656	0	53289	0	5	53289	0.0093828	0	53289	0	2	53289	0.00375312	2	53289	0.00375312
Synergistes	0.526685	0.00328398	0.00277547	0.00450374	0.00810187	0.0106338	0.0146163	0	53289	0	0	53289	0	0	53289	0	1	53289	0.00187656	11	53289	0.0206422	2	53289	0.00375312	4	53289	0.00750624	27	53289	0.0506671	0	53289	0	4	53289	0.00750624	2	53289	0.00375312	1	53289	0.00187656	4	53289	0.00750624	7	53289	0.0131359
Syntrophomonas	0.258565	0.00328398	0.00466788	0.00337781	0.00343979	0.00708923	0.00440339	4	53289	0.00750624	0	53289	0	1	53289	0.00187656	0	53289	0	4	53289	0.00750624	0	53289	0	3	53289	0.00562968	4	53289	0.00750624	2	53289	0.00375312	4	53289	0.00750624	2	53289	0.00375312	8	53289	0.0150125	4	53289	0.00750624	7	53289	0.0131359
Syntrophothermus	0.330343	0.00328398	0.00466788	0.00262718	0.00327189	0.00062552	0.00125104	4	53289	0.00750624	0	53289	0	0	53289	0	3	53289	0.00562968	0	53289	0	0	53289	0	0	53289	0	0	53289	0	0	53289	0	2	53289	0.00375312	0	53289	0	0	53289	0	0	53289	0	1	53289	0.00187656
Temperatibacter	0.394336	0.00328398	0.00466788	0.00375312	0.00427921	0.00917429	0.0100257	6	53289	0.0112594	0	53289	0	1	53289	0.00187656	0	53289	0	3	53289	0.00562968	3	53289	0.00562968	1	53289	0.00187656	2	53289	0.00375312	6	53289	0.0112594	6	53289	0.0112594	19	53289	0.0356546	3	53289	0.00562968	0	53289	0	4	53289	0.00750624
Thalassospira	0.144799	0.00328398	0.00204493	0.00150125	0.00140429	0.00125104	0.00125104	0	53289	0	1	53289	0.00187656	1	53289	0.00187656	2	53289	0.00375312	0	53289	0	1	53289	0.00187656	0	53289	0	1	53289	0.00187656	1	53289	0.00187656	1	53289	0.00187656	2	53289	0.00375312	0	53289	0	0	53289	0	0	53289	0
Tichowtungia	0.00244124	0.00328398	0.00155596	0.000750624	0.000919323	0.000417013	0.00078016	1	53289	0.00187656	0	53289	0	1	53289	0.00187656	0	53289	0	0	53289	0	0	53289	0	0	53289	0	0	53289	0	1	53289	0.00187656	0	53289	0	0	53289	0	1	53289	0.00187656	0	53289	0	0	53289	0
Winogradskyella	0.461947	0.00328398	0.00277547	0.000750624	0.00150125	0.00250208	0.00342611	2	53289	0.00375312	0	53289	0	0	53289	0	0	53289	0	0	53289	0	0	53289	0	2	53289	0.00375312	0	53289	0	6	53289	0.0112594	0	53289	0	1	53289	0.00187656	1	53289	0.00187656	2	53289	0.00375312	0	53289	0
Youxingia	0.125678	0.00328398	0.00335033	0.000375312	0.000750624	0.00250208	0.0015322	0	53289	0	0	53289	0	0	53289	0	1	53289	0.00187656	0	53289	0	0	53289	0	2	53289	0.00375312	1	53289	0.00187656	2	53289	0.00375312	0	53289	0	1	53289	0.00187656	2	53289	0.00375312	2	53289	0.00375312	2	53289	0.00375312
Acidaminococcus	0.673453	0.00281484	0.00209806	0.00225187	0.00275797	0.00145955	0.00230303	3	53289	0.00562968	3	53289	0.00562968	0	53289	0	0	53289	0	0	53289	0	0	53289	0	0	53289	0	0	53289	0	1	53289	0.00187656	0	53289	0	3	53289	0.00562968	3	53289	0.00562968	0	53289	0	0	53289	0
Algoriphagus	0.290509	0.00281484	0.00311192	0.21693	0.418873	0.0108423	0.00585306	3	53289	0.00562968	0	53289	0	6	53289	0.0112594	7	53289	0.0131359	562	53289	1.05463	6	53289	0.0112594	12	53289	0.0225187	1	53289	0.00187656	7	53289	0.0131359	3	53289	0.00562968	4	53289	0.00750624	4	53289	0.00750624	6	53289	0.0112594	9	53289	0.016889
Anaerotaenia	0.313704	0.00281484	0.00281484	0.00375312	0.00205567	0.00771475	0.00726489	2	53289	0.00375312	2	53289	0.00375312	1	53289	0.00187656	4	53289	0.00750624	1	53289	0.00187656	7	53289	0.0131359	13	53289	0.0243953	4	53289	0.00750624	0	53289	0	2	53289	0.00375312	6	53289	0.0112594	0	53289	0	2	53289	0.00375312	3	53289	0.00562968
Aquabacterium	0.0975176	0.00281484	0.00386863	0.000375312	0.000750624	0	0	1	53289	0.00187656	0	53289	0	0	53289	0	0	53289	0	0	53289	0	0	53289	0	0	53289	0	0	53289	0	0	53289	0	0	53289	0	0	53289	0	0	53289	0	0	53289	0	0	53289	0
Aromatoleum	0.577123	0.00281484	0.00281484	0.00675562	0.00483556	0.00917429	0.0121758	7	53289	0.0131359	0	53289	0	3	53289	0.00562968	6	53289	0.0112594	2	53289	0.00375312	0	53289	0	0	53289	0	2	53289	0.00375312	2	53289	0.00375312	5	53289	0.0093828	2	53289	0.00375312	14	53289	0.0262718	19	53289	0.0356546	0	53289	0
Aureimonas	0.352193	0.00281484	0.00209806	0.00450374	0.00327189	0.00187656	0.00293395	1	53289	0.00187656	1	53289	0.00187656	1	53289	0.00187656	5	53289	0.0093828	4	53289	0.00750624	0	53289	0	0	53289	0	0	53289	0	2	53289	0.00375312	0	53289	0	1	53289	0.00187656	1	53289	0.00187656	0	53289	0	5	53289	0.0093828
Cupriavidus	0.35597	0.00281484	0.00487545	0.000750624	0.000919323	0.000417013	0.00117949	1	53289	0.00187656	0	53289	0	0	53289	0	0	53289	0	1	53289	0.00187656	0	53289	0	0	53289	0	0	53289	0	0	53289	0	0	53289	0	2	53289	0.00375312	0	53289	0	0	53289	0	0	53289	0
Curvibacter	0.750768	0.00281484	0.00386863	0.00112594	0.00150125	0.00187656	0.00318954	2	53289	0.00375312	0	53289	0	0	53289	0	0	53289	0	1	53289	0.00187656	5	53289	0.0093828	0	53289	0	0	53289	0	0	53289	0	0	53289	0	3	53289	0.00562968	1	53289	0.00187656	0	53289	0	0	53289	0
Gallalistipes	0.493033	0.00281484	0.00281484	0.000750624	0.00150125	0.00145955	0.00246708	2	53289	0.00375312	0	53289	0	0	53289	0	0	53289	0	0	53289	0	0	53289	0	4	53289	0.00750624	2	53289	0.00375312	0	53289	0	0	53289	0	0	53289	0	0	53289	0	1	53289	0.00187656	0	53289	0
Gp13	0.693279	0.00281484	0.00487545	0.00412843	0.0041793	0.0108423	0.0228084	6	53289	0.0112594	2	53289	0.00375312	0	53289	0	3	53289	0.00562968	0	53289	0	2	53289	0.00375312	1	53289	0.00187656	40	53289	0.0750624	2	53289	0.00375312	4	53289	0.00750624	0	53289	0	2	53289	0.00375312	0	53289	0	1	53289	0.00187656
Heliophilum	0.988456	0.00281484	0.00209806	0.00262718	0.00437685	0.00250208	0.00265386	0	53289	0	6	53289	0.0112594	0	53289	0	0	53289	0	1	53289	0.00187656	4	53289	0.00750624	3	53289	0.00562968	1	53289	0.00187656	0	53289	0	0	53289	0	2	53289	0.00375312	2	53289	0.00375312	0	53289	0	0	53289	0
Lautropia	0.996943	0.00281484	0.00311192	0.00262718	0.00437685	0.00271059	0.0025194	0	53289	0	0	53289	0	0	53289	0	1	53289	0.00187656	6	53289	0.0112594	1	53289	0.00187656	0	53289	0	2	53289	0.00375312	0	53289	0	1	53289	0.00187656	4	53289	0.00750624	3	53289	0.00562968	2	53289	0.00375312	0	53289	0
Lawsonella	0.476537	0.00281484	0.00311192	0.000375312	0.000750624	0.00166805	0.00312064	0	53289	0	0	53289	0	0	53289	0	0	53289	0	1	53289	0.00187656	4	53289	0.00750624	0	53289	0	0	53289	0	0	53289	0	0	53289	0	0	53289	0	0	53289	0	0	53289	0	4	53289	0.00750624
Longimicrobium	0.20395	0.00281484	0.00281484	0.000375312	0.000750624	0.000834027	0.00179364	0	53289	0	0	53289	0	0	53289	0	1	53289	0.00187656	0	53289	0	0	53289	0	0	53289	0	0	53289	0	0	53289	0	0	53289	0	3	53289	0.00562968	1	53289	0.00187656	0	53289	0	0	53289	0
Mariniphaga	0.564179	0.00281484	0.00209806	0.00225187	0.00363878	0.00417013	0.0030359	0	53289	0	0	53289	0	1	53289	0.00187656	0	53289	0	5	53289	0.0093828	0	53289	0	5	53289	0.0093828	3	53289	0.00562968	4	53289	0.00750624	1	53289	0.00187656	2	53289	0.00375312	3	53289	0.00562968	0	53289	0	2	53289	0.00375312
Mucinivorans	0.207283	0.00281484	0.00162515	0.000750624	0.000919323	0.00145955	0.00171939	1	53289	0.00187656	0	53289	0	1	53289	0.00187656	0	53289	0	0	53289	0	0	53289	0	0	53289	0	1	53289	0.00187656	0	53289	0	3	53289	0.00562968	0	53289	0	1	53289	0.00187656	1	53289	0.00187656	1	53289	0.00187656
Murimonas	0.390534	0.00281484	0.00093828	0.0030025	0.00280858	0.00604669	0.00564895	4	53289	0.00750624	0	53289	0	2	53289	0.00375312	2	53289	0.00375312	0	53289	0	2	53289	0.00375312	4	53289	0.00750624	2	53289	0.00375312	11	53289	0.0206422	4	53289	0.00750624	0	53289	0	2	53289	0.00375312	1	53289	0.00187656	3	53289	0.00562968
Mycobacterium	0.728838	0.00281484	0.00209806	0.00112594	0.000919323	0.00271059	0.00469024	1	53289	0.00187656	1	53289	0.00187656	0	53289	0	0	53289	0	1	53289	0.00187656	1	53289	0.00187656	0	53289	0	0	53289	0	0	53289	0	0	53289	0	8	53289	0.0150125	1	53289	0.00187656	3	53289	0.00562968	0	53289	0
Nitrospina	0.147414	0.00281484	0.00209806	0.000375312	0.000750624	0.00729773	0.00783497	1	53289	0.00187656	0	53289	0	0	53289	0	0	53289	0	0	53289	0	2	53289	0.00375312	1	53289	0.00187656	1	53289	0.00187656	14	53289	0.0262718	7	53289	0.0131359	5	53289	0.0093828	0	53289	0	4	53289	0.00750624	1	53289	0.00187656
Oligella	0.0273713	0.00281484	0.00311192	0.00900749	0.0107079	0.0233527	0.013593	15	53289	0.0281484	2	53289	0.00375312	0	53289	0	0	53289	0	7	53289	0.0131359	3	53289	0.00562968	8	53289	0.0150125	7	53289	0.0131359	13	53289	0.0243953	12	53289	0.0225187	15	53289	0.0281484	15	53289	0.0281484	9	53289	0.016889	30	53289	0.0562968
Phaeovibrio	0.929347	0.00281484	0.00209806	0.00187656	0.00290715	0.00271059	0.00493417	0	53289	0	0	53289	0	1	53289	0.00187656	0	53289	0	4	53289	0.00750624	0	53289	0	0	53289	0	0	53289	0	8	53289	0.0150125	0	53289	0	1	53289	0.00187656	4	53289	0.00750624	0	53289	0	0	53289	0
Polynucleobacter	0.595481	0.00281484	0.00093828	0.00825686	0.0147092	0.00354461	0.00428328	20	53289	0.0375312	0	53289	0	0	53289	0	0	53289	0	2	53289	0.00375312	0	53289	0	1	53289	0.00187656	0	53289	0	7	53289	0.0131359	3	53289	0.00562968	2	53289	0.00375312	4	53289	0.00750624	0	53289	0	0	53289	0
Pseudoclostridium	0.503875	0.00281484	0.00487545	0.00713093	0.00549034	0.00417013	0.00514129	8	53289	0.0150125	0	53289	0	1	53289	0.00187656	5	53289	0.0093828	5	53289	0.0093828	3	53289	0.00562968	0	53289	0	3	53289	0.00562968	0	53289	0	9	53289	0.016889	2	53289	0.00375312	0	53289	0	3	53289	0.00562968	0	53289	0
Sporosalibacterium	0.487495	0.00281484	0.00386863	0.000375312	0.000750624	0.00145955	0.00276615	1	53289	0.00187656	0	53289	0	0	53289	0	0	53289	0	0	53289	0	0	53289	0	0	53289	0	0	53289	0	4	53289	0.00750624	3	53289	0.00562968	0	53289	0	0	53289	0	0	53289	0	0	53289	0
Thermincola	0.0486476	0.00281484	0.00209806	0.00150125	0.00140429	0.000417013	0.00078016	1	53289	0.00187656	0	53289	0	0	53289	0	2	53289	0.00375312	1	53289	0.00187656	1	53289	0.00187656	0	53289	0	0	53289	0	0	53289	0	0	53289	0	0	53289	0	0	53289	0	0	53289	0	1	53289	0.00187656
Thermoanaerobacter	0.545938	0.00281484	0.00209806	0.00187656	0.00237368	0.00375312	0.00318954	3	53289	0.00562968	0	53289	0	0	53289	0	2	53289	0.00375312	0	53289	0	5	53289	0.0093828	1	53289	0.00187656	3	53289	0.00562968	4	53289	0.00750624	1	53289	0.00187656	0	53289	0	1	53289	0.00187656	0	53289	0	3	53289	0.00562968
Tractidigestivibacter	0.45053	0.00281484	0.00281484	0.00187656	0.00290715	0.000834027	0.00179364	4	53289	0.00750624	1	53289	0.00187656	0	53289	0	0	53289	0	0	53289	0	0	53289	0	0	53289	0	0	53289	0	0	53289	0	0	53289	0	3	53289	0.00562968	1	53289	0.00187656	0	53289	0	0	53289	0
Ulvibacterium	0.170725	0.00281484	0.00386863	0.000375312	0.000750624	0.000417013	0.00078016	0	53289	0	0	53289	0	1	53289	0.00187656	0	53289	0	0	53289	0	0	53289	0	0	53289	0	1	53289	0.00187656	0	53289	0	1	53289	0.00187656	0	53289	0	0	53289	0	0	53289	0	0	53289	0
Acidaminobacter	0.0806216	0.0023457	0.00155596	0.000750624	0.00150125	0.000417013	0.00078016	0	53289	0	2	53289	0.00375312	0	53289	0	0	53289	0	0	53289	0	0	53289	0	0	53289	0	0	53289	0	0	53289	0	1	53289	0.00187656	0	53289	0	0	53289	0	0	53289	0	1	53289	0.00187656
Aminobacterium	0.688812	0.0023457	0.00243772	0.000750624	0.000919323	0.00145955	0.0030359	0	53289	0	0	53289	0	0	53289	0	1	53289	0.00187656	1	53289	0.00187656	0	53289	0	2	53289	0.00375312	0	53289	0	5	53289	0.0093828	0	53289	0	0	53289	0	0	53289	0	0	53289	0	0	53289	0
Anaerosacchariphilus	0.534175	0.0023457	0.00155596	0.00375312	0.00118684	0.00291909	0.00199993	2	53289	0.00375312	2	53289	0.00375312	1	53289	0.00187656	3	53289	0.00562968	2	53289	0.00375312	1	53289	0.00187656	1	53289	0.00187656	2	53289	0.00375312	0	53289	0	3	53289	0.00562968	2	53289	0.00375312	0	53289	0	3	53289	0.00562968	2	53289	0.00375312
Aquimarina	0.0378563	0.0023457	0.00204493	0	0	0.00062552	0.000884619	0	53289	0	0	53289	0	0	53289	0	0	53289	0	0	53289	0	0	53289	0	0	53289	0	0	53289	0	0	53289	0	0	53289	0	1	53289	0.00187656	1	53289	0.00187656	1	53289	0.00187656	0	53289	0
Atopostipes	0.176912	0.0023457	0.00406287	0	0	0.0031276	0.00250208	0	53289	0	0	53289	0	0	53289	0	0	53289	0	0	53289	0	1	53289	0.00187656	0	53289	0	1	53289	0.00187656	2	53289	0.00375312	1	53289	0.00187656	2	53289	0.00375312	5	53289	0.0093828	2	53289	0.00375312	1	53289	0.00187656
Bibersteinia	0.467028	0.0023457	0.00406287	0.00600499	0.00763647	0.00813176	0.00755819	11	53289	0.0206422	0	53289	0	0	53289	0	3	53289	0.00562968	2	53289	0.00375312	8	53289	0.0150125	3	53289	0.00562968	2	53289	0.00375312	0	53289	0	10	53289	0.0187656	1	53289	0.00187656	0	53289	0	11	53289	0.0206422	4	53289	0.00750624
Bradyrhizobium	0.263211	0.0023457	0.00243772	0.00112594	0.000919323	0.00062552	0.00125104	1	53289	0.00187656	1	53289	0.00187656	1	53289	0.00187656	0	53289	0	0	53289	0	0	53289	0	0	53289	0	0	53289	0	0	53289	0	0	53289	0	2	53289	0.00375312	1	53289	0.00187656	0	53289	0	0	53289	0
Breznakibacter	0.781725	0.0023457	0.000812574	0.00825686	0.0111714	0.0102168	0.022451	7	53289	0.0131359	15	53289	0.0281484	0	53289	0	0	53289	0	0	53289	0	0	53289	0	2	53289	0.00375312	0	53289	0	5	53289	0.0093828	39	53289	0.0731858	1	53289	0.00187656	0	53289	0	0	53289	0	2	53289	0.00375312
Caldanaerobius	0.0967736	0.0023457	0.00243772	0.00150125	0.00218843	0	0	0	53289	0	0	53289	0	0	53289	0	3	53289	0.00562968	1	53289	0.00187656	0	53289	0	0	53289	0	0	53289	0	0	53289	0	0	53289	0	0	53289	0	0	53289	0	0	53289	0	0	53289	0
Caminibacter	0.793541	0.0023457	0.00243772	0.00375312	0.00517332	0.00229357	0.0030359	7	53289	0.0131359	3	53289	0.00562968	0	53289	0	0	53289	0	0	53289	0	1	53289	0.00187656	3	53289	0.00562968	1	53289	0.00187656	5	53289	0.0093828	1	53289	0.00187656	0	53289	0	0	53289	0	0	53289	0	0	53289	0
Chlorophyta	0.411877	0.0023457	0.00307636	0	0	0.00166805	0.0028589	0	53289	0	0	53289	0	0	53289	0	0	53289	0	0	53289	0	0	53289	0	0	53289	0	0	53289	0	1	53289	0.00187656	5	53289	0.0093828	0	53289	0	0	53289	0	1	53289	0.00187656	1	53289	0.00187656
[truncated: 506 more rows]
[truncated: 12 more columns]

## Sheet: 4C
Supplementry Table 4C : Groupwise mean relative abundance (%) of bacterial genera present at above one percent mean relative frequency in rumen solid and liquid fraction.
[truncated: 60 more rows]

[truncated: 2 more sheets: 4D, 4E]
