# Supplementary material for: A diet containing Moringa oleifera alters the goat rumen microbiome: an insight into bacteria, ciliates and rumen anaerobic fungi
Source: Research Square preprint supplement (doi:10.21203/rs.3.rs-8826260/v1), 2026-02-23
Supplement: Supplementary file 6 [file f585fd18633a6591a778b571.xlsx]

## Sheet: 5A
Supplementry Table 5A : Groupwise and samplewise mean relative abundance (%) of ciliate genera present in rumen liquor samples.
Genus	p-values	MS: mean rel. freq. (%)	MS: std. dev. (%)	20%MLM: mean rel. freq. (%)	20%MLM: std. dev. (%)	30%MLM: mean rel. freq. (%)	30%MLM: std. dev. (%)	G21R	G21R: parent seq. count	G21R: rel. freq. (%)	G22R	G22R: parent seq. count	G22R: rel. freq. (%)	G23R	G23R: parent seq. count	G23R: rel. freq. (%)	G24R	G24R: parent seq. count	G24R: rel. freq. (%)	G25R	G25R: parent seq. count	G25R: rel. freq. (%)	G26R	G26R: parent seq. count	G26R: rel. freq. (%)	G27R	G27R: parent seq. count	G27R: rel. freq. (%)	G28R	G28R: parent seq. count	G28R: rel. freq. (%)	G310R	G310R: parent seq. count	G310R: rel. freq. (%)	G31R	G31R: parent seq. count	G31R: rel. freq. (%)	G32R	G32R: parent seq. count	G32R: rel. freq. (%)	G33R	G33R: parent seq. count	G33R: rel. freq. (%)	G34R	G34R: parent seq. count	G34R: rel. freq. (%)	G35R	G35R: parent seq. count	G35R: rel. freq. (%)
Polyplastron	0.729853	27.6496	10.642	29.9709	9.60305	26.5832	3.01869	33533	161792	20.726	58893	161792	36.4004	34640	161792	21.4102	29704	161792	18.3594	48185	161792	29.7821	71559	161792	44.229	70164	161792	43.3668	41246	161792	25.4932	42641	161792	26.3554	44384	161792	27.4328	48148	161792	29.7592	43303	161792	26.7646	49586	161792	30.648	43052	161792	26.6095
Entodinium	7.46701e-06	16.393	6.76617	3.78148	1.28307	4.5496	2.18345	7606	161792	4.7011	6139	161792	3.79438	6230	161792	3.85062	9730	161792	6.01389	4322	161792	2.67133	2880	161792	1.78006	4365	161792	2.69791	7673	161792	4.74251	4436	161792	2.74179	6063	161792	3.7474	7269	161792	4.49281	16650	161792	10.291	6415	161792	3.96497	3663	161792	2.26402
Enoploplastron	0.0344765	11.8864	4.96576	14.5746	4.59426	20.0471	7.16359	34021	161792	21.0276	16534	161792	10.2193	34699	161792	21.4467	20090	161792	12.4172	23757	161792	14.6837	27902	161792	17.2456	17871	161792	11.0457	13770	161792	8.51093	46333	161792	28.6374	25179	161792	15.5626	23413	161792	14.471	16853	161792	10.4165	34643	161792	21.4121	42759	161792	26.4284
Trichostomatia_XX	0.028966	8.7587	2.08691	6.2456	1.49115	6.43638	1.85903	10158	161792	6.27843	8427	161792	5.20854	8173	161792	5.05155	8458	161792	5.2277	10207	161792	6.30872	9395	161792	5.80684	9856	161792	6.09177	16165	161792	9.99122	10235	161792	6.32602	6634	161792	4.10033	8126	161792	5.0225	10265	161792	6.34457	11746	161792	7.25994	11831	161792	7.31248
Diploplastron	0.00101905	7.00985	2.50311	9.99972	2.48257	11.9789	1.5454	16164	161792	9.99061	15815	161792	9.7749	23082	161792	14.2665	15154	161792	9.36635	11087	161792	6.85263	10745	161792	6.64124	16227	161792	10.0295	21156	161792	13.076	18797	161792	11.618	16617	161792	10.2706	13832	161792	8.54925	21461	161792	13.2646	19209	161792	11.8727	20592	161792	12.7275
Epidinium	0.714808	6.48989	4.81231	7.92375	3.14216	7.73469	2.42406	12230	161792	7.55909	9747	161792	6.0244	14431	161792	8.91948	17409	161792	10.7601	22610	161792	13.9747	4678	161792	2.89137	9628	161792	5.95085	11827	161792	7.31	15937	161792	9.8503	7390	161792	4.56759	9812	161792	6.06458	10742	161792	6.63939	10549	161792	6.5201	11084	161792	6.85077
Entodinium_1	6.63701e-07	5.75361	1.16131	2.01849	1.06426	2.06225	0.971623	3698	161792	2.28565	3052	161792	1.88637	3365	161792	2.07983	7389	161792	4.56697	2569	161792	1.58784	1427	161792	0.881997	1683	161792	1.04022	2943	161792	1.819	1085	161792	0.670614	3306	161792	2.04336	6079	161792	3.75729	5935	161792	3.66829	2644	161792	1.6342	1973	161792	1.21947
Eodinium	0.874777	4.13787	1.4951	4.21421	1.21976	3.92019	0.57079	4849	161792	2.99706	8041	161792	4.96996	4994	161792	3.08668	4505	161792	2.78444	7037	161792	4.34941	9497	161792	5.86988	9800	161792	6.05716	5823	161792	3.59907	7722	161792	4.77279	6511	161792	4.0243	6587	161792	4.07128	6145	161792	3.79809	7070	161792	4.36981	6752	161792	4.17326
Ophryoscolecidae_1_X	0.000476721	3.47622	1.42855	1.0763	0.543667	1.58084	0.883258	1390	161792	0.859128	1469	161792	0.907956	2344	161792	1.44877	3615	161792	2.23435	904	161792	0.558742	557	161792	0.344269	1835	161792	1.13417	1817	161792	1.12305	1272	161792	0.786195	1650	161792	1.01983	3449	161792	2.13175	5488	161792	3.39201	1405	161792	0.868399	640	161792	0.39557
Dasytricha	0.00895576	2.78444	2.08628	7.10001	3.19578	4.78468	1.59617	8316	161792	5.13993	11485	161792	7.09862	14032	161792	8.67286	21242	161792	13.1292	15545	161792	9.60802	2789	161792	1.72382	9266	161792	5.72711	9223	161792	5.70053	4342	161792	2.68369	7537	161792	4.65845	8738	161792	5.40076	11546	161792	7.13632	4944	161792	3.05578	4035	161792	2.49394
Isotricha	0.239742	2.06345	1.65942	4.60105	3.58236	4.3332	3.37828	4726	161792	2.92103	3662	161792	2.2634	2919	161792	1.80417	13357	161792	8.25566	6777	161792	4.18871	2343	161792	1.44816	5606	161792	3.46494	20163	161792	12.4623	2709	161792	1.67437	19880	161792	12.2874	12674	161792	7.83351	6860	161792	4.24001	3017	161792	1.86474	2786	161792	1.72196
Eremoplastron	0.245849	1.48934	1.33875	2.85436	2.18594	2.03485	0.578953	2888	161792	1.78501	12910	161792	7.97938	3037	161792	1.8771	3675	161792	2.27143	1808	161792	1.11748	7496	161792	4.63311	2165	161792	1.33814	2966	161792	1.83322	2918	161792	1.80355	4963	161792	3.06752	5089	161792	3.1454	2780	161792	1.71826	2447	161792	1.51244	2816	161792	1.74051
Ostracodinium	0.505748	0.508601	0.388548	0.296445	0.297711	0.396462	0.316661	415	161792	0.256502	164	161792	0.101365	129	161792	0.079732	116	161792	0.071697	309	161792	0.190986	668	161792	0.412876	365	161792	0.225598	1671	161792	1.03281	1172	161792	0.724387	176	161792	0.108782	174	161792	0.107545	229	161792	0.14154	786	161792	0.485809	1415	161792	0.87458
Metadinium	0.0672373	0.427555	0.475655	1.75202	1.31433	1.93335	1.64429	208	161792	0.12856	365	161792	0.225598	6698	161792	4.13988	3422	161792	2.11506	3688	161792	2.27947	4508	161792	2.78629	752	161792	0.464794	3036	161792	1.87648	547	161792	0.338088	7703	161792	4.76105	4957	161792	3.06381	842	161792	0.520421	4882	161792	3.01745	6268	161792	3.87411
Isotrichidae_2_X	0.0509114	0.359335	0.255719	0.83201	0.457222	0.646028	0.284047	856	161792	0.529074	1095	161792	0.676795	1023	161792	0.632293	2862	161792	1.76894	2070	161792	1.27942	323	161792	0.199639	1482	161792	0.915991	1058	161792	0.653926	413	161792	0.255266	748	161792	0.462322	971	161792	0.600153	1923	161792	1.18856	912	161792	0.563687	537	161792	0.331908
Blastocystis	0.103488	0.252871	0.178042	0.111177	0.0747084	0.143051	0.100355	278	161792	0.171826	465	161792	0.287406	125	161792	0.0772597	113	161792	0.0698428	93	161792	0.0574812	108	161792	0.0667524	144	161792	0.0890032	113	161792	0.0698428	574	161792	0.354777	109	161792	0.0673705	123	161792	0.0760235	126	161792	0.0778778	138	161792	0.0852947	91	161792	0.0562451
Diplodinium	0.196692	0.238346	0.427024	2.28689	3.88992	0.527289	0.516746	19830	161792	12.2565	3148	161792	1.94571	1234	161792	0.762708	108	161792	0.0667524	86	161792	0.0531547	4639	161792	2.86726	140	161792	0.0865309	415	161792	0.256502	165	161792	0.101983	2572	161792	1.5897	1964	161792	1.2139	168	161792	0.103837	959	161792	0.592736	1097	161792	0.678031
Ophryoscolex	0.762587	0.142235	0.105453	0.169894	0.0678743	0.146965	0.0421219	240	161792	0.148339	183	161792	0.113108	367	161792	0.226834	417	161792	0.257738	428	161792	0.264537	104	161792	0.0642801	203	161792	0.12547	257	161792	0.158846	262	161792	0.161936	150	161792	0.0927116	187	161792	0.11558	230	161792	0.142158	193	161792	0.119289	219	161792	0.135359
Pinnularia	0.0696938	0.0134432	0.00885357	0.00587174	0.00305933	0.0063868	0.00632335	16	161792	0.00988924	3	161792	0.00185423	8	161792	0.00494462	17	161792	0.0105073	7	161792	0.00432654	11	161792	0.00679885	11	161792	0.00679885	3	161792	0.00185423	27	161792	0.0166881	0	161792	0	0	161792	0	8	161792	0.00494462	28	161792	0.0173062	3	161792	0.00185423
Euplotes	0.313446	0.0130569	0.0275486	0.0187741	0.0144554	0.00432654	0.00656056	83	161792	0.0513004	9	161792	0.0055627	8	161792	0.00494462	22	161792	0.0135977	41	161792	0.0253412	25	161792	0.0154519	13	161792	0.00803501	42	161792	0.0259593	0	161792	0	0	161792	0	1	161792	0.000618078	0	161792	0	0	161792	0	0	161792	0
Paraisotricha	0.0495289	0.0129796	0.00527181	0.0146793	0.0027598	0.0187484	0.00468001	27	161792	0.0166881	16	161792	0.00988924	23	161792	0.0142158	25	161792	0.0154519	20	161792	0.0123616	22	161792	0.0135977	25	161792	0.0154519	32	161792	0.0197785	31	161792	0.0191604	35	161792	0.0216327	38	161792	0.0234869	18	161792	0.0111254	25	161792	0.0154519	27	161792	0.0166881
Blepharocorys	0.231098	0.0129796	0.00667123	0.0105846	0.00410496	0.00824103	0.00443793	8	161792	0.00494462	13	161792	0.00803501	20	161792	0.0123616	30	161792	0.0185423	15	161792	0.00927116	10	161792	0.00618078	21	161792	0.0129796	20	161792	0.0123616	7	161792	0.00432654	30	161792	0.0185423	19	161792	0.0117435	15	161792	0.00927116	13	161792	0.00803501	4	161792	0.00247231
Polydiniella	0.857192	0.0125161	0.00625565	0.0127478	0.00262114	0.0139411	0.00620894	20	161792	0.0123616	15	161792	0.00927116	14	161792	0.00865309	26	161792	0.01607	23	161792	0.0142158	22	161792	0.0135977	19	161792	0.0117435	26	161792	0.01607	6	161792	0.00370847	40	161792	0.0247231	24	161792	0.0148339	33	161792	0.0203966	16	161792	0.00988924	22	161792	0.0135977
Carchesium	0.315113	0.0103528	0.0196398	0.00239505	0.00164801	0.00226628	0.00255671	8	161792	0.00494462	4	161792	0.00247231	4	161792	0.00247231	3	161792	0.00185423	8	161792	0.00494462	2	161792	0.00123616	2	161792	0.00123616	0	161792	0	5	161792	0.00309039	0	161792	0	1	161792	0.000618078	0	161792	0	10	161792	0.00618078	0	161792	0
Eudiplodinium	0.251845	0.0099665	0.00555787	0.0131341	0.0041663	0.0144905	0.0056506	17	161792	0.0105073	15	161792	0.00927116	26	161792	0.01607	29	161792	0.0179242	28	161792	0.0173062	11	161792	0.00679885	16	161792	0.00988924	28	161792	0.0173062	29	161792	0.0179242	13	161792	0.00803501	16	161792	0.00988924	13	161792	0.00803501	17	161792	0.0105073	25	161792	0.0154519
Stentor	0.212374	0.00741693	0.014023	0.00633529	0.00526954	6.86753e-05	0.000194243	10	161792	0.00618078	6	161792	0.00370847	5	161792	0.00309039	10	161792	0.00618078	10	161792	0.00618078	10	161792	0.00618078	0	161792	0	31	161792	0.0191604	0	161792	0	0	161792	0	0	161792	0	1	161792	0.000618078	0	161792	0	0	161792	0
Colpoda	0.0246101	0.00726241	0.00549142	0.00355395	0.00400262	0.00123616	0.00142739	19	161792	0.0117435	0	161792	0	9	161792	0.0055627	2	161792	0.00123616	0	161792	0	1	161792	0.000618078	3	161792	0.00185423	12	161792	0.00741693	0	161792	0	2	161792	0.00123616	0	161792	0	8	161792	0.00494462	2	161792	0.00123616	0	161792	0
Gassovskiella	0.097192	0.00641255	0.00379675	0.015761	0.0116496	0.0116748	0.00566061	5	161792	0.00309039	16	161792	0.00988924	31	161792	0.0191604	65	161792	0.040175	40	161792	0.0247231	3	161792	0.00185423	22	161792	0.0135977	22	161792	0.0135977	7	161792	0.00432654	11	161792	0.00679885	12	161792	0.00741693	30	161792	0.0185423	29	161792	0.0179242	10	161792	0.00618078
Pylaiella	0.207957	0.00633529	0.00332486	0.00981198	0.00385293	0.00851573	0.00357771	13	161792	0.00803501	13	161792	0.00803501	16	161792	0.00988924	25	161792	0.0154519	13	161792	0.00803501	5	161792	0.00309039	17	161792	0.0105073	25	161792	0.0154519	24	161792	0.0148339	12	161792	0.00741693	10	161792	0.00618078	4	161792	0.00247231	16	161792	0.00988924	21	161792	0.0129796
Allas	0.511267	0.00587174	0.00528989	0.0040175	0.00424858	0.00315906	0.00397843	18	161792	0.0111254	2	161792	0.00123616	17	161792	0.0105073	9	161792	0.0055627	0	161792	0	4	161792	0.00247231	1	161792	0.000618078	1	161792	0.000618078	22	161792	0.0135977	2	161792	0.00123616	1	161792	0.000618078	4	161792	0.00247231	9	161792	0.0055627	0	161792	0
Pseudoentodinium	0.0449219	0.00509914	0.00432378	0.00826679	0.00700597	0.0144218	0.00842945	11	161792	0.00679885	3	161792	0.00185423	6	161792	0.00370847	21	161792	0.0129796	34	161792	0.0210146	4	161792	0.00247231	26	161792	0.01607	2	161792	0.00123616	5	161792	0.00309039	14	161792	0.00865309	28	161792	0.0173062	47	161792	0.0290496	15	161792	0.00927116	7	161792	0.00432654
Amphileptus	0.402389	0.00486736	0.0113061	0.000231779	0.00061323	0.00116748	0.00330213	0	161792	0	0	161792	0	3	161792	0.00185423	0	161792	0	0	161792	0	0	161792	0	0	161792	0	0	161792	0	0	161792	0	0	161792	0	0	161792	0	0	161792	0	0	161792	0	0	161792	0
MAST_12_X	0.593513	0.00455832	0.00777487	0.00602626	0.00845067	0.00219761	0.00535755	37	161792	0.0228689	0	161792	0	4	161792	0.00247231	29	161792	0.0179242	2	161792	0.00123616	5	161792	0.00309039	1	161792	0.000618078	0	161792	0	0	161792	0	1	161792	0.000618078	1	161792	0.000618078	0	161792	0	0	161792	0	0	161792	0
Triadinium_2	0.0600546	0.00432654	0.00264043	0.00865309	0.00484708	0.00982057	0.00508383	27	161792	0.0166881	22	161792	0.0135977	20	161792	0.0123616	16	161792	0.00988924	9	161792	0.0055627	6	161792	0.00370847	5	161792	0.00309039	7	161792	0.00432654	32	161792	0.0197785	15	161792	0.00927116	7	161792	0.00432654	13	161792	0.00803501	17	161792	0.0105073	9	161792	0.0055627
Cycloposthium	0.108627	0.0040175	0.00289904	0.00324491	0.00182176	0.00171688	0.00112006	4	161792	0.00247231	3	161792	0.00185423	6	161792	0.00370847	11	161792	0.00679885	3	161792	0.00185423	1	161792	0.000618078	7	161792	0.00432654	7	161792	0.00432654	1	161792	0.000618078	0	161792	0	1	161792	0.000618078	4	161792	0.00247231	2	161792	0.00123616	4	161792	0.00247231
Blastocystis_Group_X	0.221309	0.00386298	0.00297625	0.00193149	0.00249992	0.00405184	0.00191307	3	161792	0.00185423	13	161792	0.00803501	0	161792	0	0	161792	0	1	161792	0.000618078	1	161792	0.000618078	2	161792	0.00123616	5	161792	0.00309039	6	161792	0.00370847	7	161792	0.00432654	0	161792	0	3	161792	0.00185423	10	161792	0.00618078	9	161792	0.0055627
Buxtonella	0.129427	0.00378572	0.00448306	0.00162245	0.00166243	0.000824103	0.000966347	4	161792	0.00247231	9	161792	0.0055627	3	161792	0.00185423	1	161792	0.000618078	1	161792	0.000618078	1	161792	0.000618078	0	161792	0	2	161792	0.00123616	0	161792	0	1	161792	0.000618078	2	161792	0.00123616	2	161792	0.00123616	2	161792	0.00123616	0	161792	0
Stephanodiscus	0.106779	0.00239505	0.0017601	0.0011589	0.000482487	0.00260966	0.00142077	2	161792	0.00123616	1	161792	0.000618078	3	161792	0.00185423	2	161792	0.00123616	2	161792	0.00123616	3	161792	0.00185423	1	161792	0.000618078	1	161792	0.000618078	8	161792	0.00494462	1	161792	0.000618078	5	161792	0.00309039	6	161792	0.00370847	6	161792	0.00370847	2	161792	0.00123616
Macropodinium	0.718256	0.00216327	0.00160581	0.00216327	0.0011969	0.00274701	0.00189075	7	161792	0.00432654	1	161792	0.000618078	5	161792	0.00309039	5	161792	0.00309039	1	161792	0.000618078	3	161792	0.00185423	3	161792	0.00185423	3	161792	0.00185423	0	161792	0	7	161792	0.00432654	5	161792	0.00309039	5	161792	0.00309039	1	161792	0.000618078	8	161792	0.00494462
Tetrahymenida_X	0.516686	0.00208601	0.0046555	0.00262683	0.00452876	0.000480727	0.000999927	0	161792	0	0	161792	0	0	161792	0	0	161792	0	9	161792	0.0055627	0	161792	0	3	161792	0.00185423	22	161792	0.0135977	0	161792	0	0	161792	0	0	161792	0	0	161792	0	0	161792	0	0	161792	0
Fuscheria	0.523579	0.00193149	0.000998415	0.00131341	0.00104515	0.00178556	0.00110736	0	161792	0	2	161792	0.00123616	3	161792	0.00185423	1	161792	0.000618078	5	161792	0.00309039	0	161792	0	2	161792	0.00123616	4	161792	0.00247231	6	161792	0.00370847	4	161792	0.00247231	1	161792	0.000618078	3	161792	0.00185423	3	161792	0.00185423	4	161792	0.00247231
Neobalantidium	0.488563	0.00169971	0.0012648	0.00139067	0.001302	0.000961454	0.000971215	6	161792	0.00370847	0	161792	0	1	161792	0.000618078	5	161792	0.00309039	3	161792	0.00185423	0	161792	0	1	161792	0.000618078	2	161792	0.00123616	1	161792	0.000618078	1	161792	0.000618078	0	161792	0	0	161792	0	0	161792	0	2	161792	0.00123616
Schizocalyptra	0.47492	0.00146793	0.00123374	0.00185423	0.00111426	0.00116748	0.000846686	0	161792	0	4	161792	0.00247231	3	161792	0.00185423	6	161792	0.00370847	2	161792	0.00123616	2	161792	0.00123616	5	161792	0.00309039	2	161792	0.00123616	2	161792	0.00123616	1	161792	0.000618078	1	161792	0.000618078	2	161792	0.00123616	1	161792	0.000618078	2	161792	0.00123616
Tetrahymena	0.909125	0.00146793	0.00254723	0.00108164	0.00176856	0.00103013	0.00186564	0	161792	0	0	161792	0	0	161792	0	0	161792	0	0	161792	0	5	161792	0.00309039	1	161792	0.000618078	8	161792	0.00494462	0	161792	0	0	161792	0	0	161792	0	0	161792	0	0	161792	0	0	161792	0
Loxophyllum	0.301045	0.00131341	0.00113285	0.00193149	0.000998415	0.00206026	0.000713694	3	161792	0.00185423	2	161792	0.00123616	0	161792	0	4	161792	0.00247231	3	161792	0.00185423	3	161792	0.00185423	4	161792	0.00247231	6	161792	0.00370847	2	161792	0.00123616	5	161792	0.00309039	3	161792	0.00185423	4	161792	0.00247231	3	161792	0.00185423	2	161792	0.00123616
Nyctotheroides	0.0650272	0.00123616	0.00107054	0.00200875	0.0012648	0.00315906	0.00196416	4	161792	0.00247231	0	161792	0	4	161792	0.00247231	6	161792	0.00370847	2	161792	0.00123616	1	161792	0.000618078	3	161792	0.00185423	6	161792	0.00370847	2	161792	0.00123616	1	161792	0.000618078	4	161792	0.00247231	7	161792	0.00432654	1	161792	0.000618078	7	161792	0.00432654
Balantidium_1	0.172914	0.0011589	0.000949383	0.00231779	0.00101325	0.00212893	0.00151709	4	161792	0.00247231	5	161792	0.00309039	5	161792	0.00309039	4	161792	0.00247231	5	161792	0.00309039	1	161792	0.000618078	5	161792	0.00309039	1	161792	0.000618078	0	161792	0	2	161792	0.00123616	5	161792	0.00309039	4	161792	0.00247231	1	161792	0.000618078	1	161792	0.000618078
Epicarchesium	0.213157	0.0011589	0.0017601	0.00123616	0.00172066	6.86753e-05	0.000194243	8	161792	0.00494462	0	161792	0	0	161792	0	5	161792	0.00309039	2	161792	0.00123616	0	161792	0	0	161792	0	1	161792	0.000618078	0	161792	0	0	161792	0	0	161792	0	0	161792	0	0	161792	0	0	161792	0
Ancistrum	0.455477	0.00100438	0.00134485	0.000849857	0.000753034	0.00157953	0.00130664	0	161792	0	3	161792	0.00185423	3	161792	0.00185423	1	161792	0.000618078	0	161792	0	2	161792	0.00123616	0	161792	0	2	161792	0.00123616	3	161792	0.00185423	0	161792	0	0	161792	0	2	161792	0.00123616	4	161792	0.00247231	3	161792	0.00185423
Histiobalantium	0.996401	0.000927116	0.00107054	0.000927116	0.000756987	0.000892779	0.000879473	1	161792	0.000618078	3	161792	0.00185423	0	161792	0	0	161792	0	1	161792	0.000618078	1	161792	0.000618078	3	161792	0.00185423	3	161792	0.00185423	0	161792	0	0	161792	0	2	161792	0.00123616	0	161792	0	4	161792	0.00247231	0	161792	0
Phialina	0.871742	0.000849857	0.00115373	0.00108164	0.00101325	0.000686753	0.00194243	0	161792	0	1	161792	0.000618078	3	161792	0.00185423	2	161792	0.00123616	4	161792	0.00247231	0	161792	0	4	161792	0.00247231	0	161792	0	0	161792	0	0	161792	0	0	161792	0	0	161792	0	0	161792	0	0	161792	0
Filosa_Sarcomonadea_XXX	0.0356306	0.000849857	0.000974208	0.000231779	0.000430164	0	0	0	161792	0	0	161792	0	0	161792	0	1	161792	0.000618078	0	161792	0	0	161792	0	2	161792	0.00123616	0	161792	0	0	161792	0	0	161792	0	0	161792	0	0	161792	0	0	161792	0	0	161792	0
Cyclospora	0.834183	0.000772597	0.00147402	0.000386298	0.000529666	0.000618078	0.00136662	0	161792	0	0	161792	0	2	161792	0.00123616	2	161792	0.00123616	1	161792	0.000618078	0	161792	0	0	161792	0	0	161792	0	0	161792	0	0	161792	0	0	161792	0	2	161792	0.00123616	0	161792	0	0	161792	0
Halodinium	0.180154	0.000772597	0.0012648	0.000309039	0.000535271	0	0	0	161792	0	0	161792	0	0	161792	0	2	161792	0.00123616	0	161792	0	0	161792	0	0	161792	0	2	161792	0.00123616	0	161792	0	0	161792	0	0	161792	0	0	161792	0	0	161792	0	0	161792	0
Urostomides	0.48963	0.000695337	0.00121423	0.000695337	0.000897676	0.00123616	0.000874094	3	161792	0.00185423	0	161792	0	4	161792	0.00247231	0	161792	0	1	161792	0.000618078	0	161792	0	0	161792	0	1	161792	0.000618078	1	161792	0.000618078	3	161792	0.00185423	0	161792	0	1	161792	0.000618078	5	161792	0.00309039	2	161792	0.00123616
Pseudoplatynematum	0.810716	0.000695337	0.000897676	0.000463558	0.000512483	0.000618078	0.000582729	1	161792	0.000618078	2	161792	0.00123616	0	161792	0	1	161792	0.000618078	0	161792	0	0	161792	0	0	161792	0	2	161792	0.00123616	0	161792	0	0	161792	0	1	161792	0.000618078	1	161792	0.000618078	0	161792	0	1	161792	0.000618078
Cercomonas	0.64451	0.000540818	0.00072063	0.000849857	0.000870673	0.000892779	0.000720272	0	161792	0	0	161792	0	1	161792	0.000618078	0	161792	0	2	161792	0.00123616	3	161792	0.00185423	1	161792	0.000618078	4	161792	0.00247231	2	161792	0.00123616	1	161792	0.000618078	0	161792	0	0	161792	0	2	161792	0.00123616	0	161792	0
Ophrydium	0.683844	0.000463558	0.000860328	0.000154519	0.000267635	0.000412052	0.000824103	0	161792	0	0	161792	0	1	161792	0.000618078	0	161792	0	0	161792	0	1	161792	0.000618078	0	161792	0	0	161792	0	0	161792	0	0	161792	0	0	161792	0	0	161792	0	0	161792	0	0	161792	0
Opalina	0.592877	0.000463558	0.00101325	0.000309039	0.00081764	6.86753e-05	0.000194243	4	161792	0.00247231	0	161792	0	0	161792	0	0	161792	0	0	161792	0	0	161792	0	0	161792	0	0	161792	0	0	161792	0	0	161792	0	0	161792	0	0	161792	0	1	161792	0.000618078	0	161792	0
Vorticella	0.48462	0.000386298	0.000813981	0.00123616	0.0014821	0.000961454	0.00154481	0	161792	0	6	161792	0.00370847	2	161792	0.00123616	6	161792	0.00370847	1	161792	0.000618078	0	161792	0	0	161792	0	1	161792	0.000618078	0	161792	0	0	161792	0	0	161792	0	2	161792	0.00123616	0	161792	0	0	161792	0
Parastrombidinopsis	0.70916	0.000386298	0.000430164	0.000386298	0.000299225	0.000549402	0.00054075	1	161792	0.000618078	0	161792	0	1	161792	0.000618078	1	161792	0.000618078	1	161792	0.000618078	0	161792	0	0	161792	0	1	161792	0.000618078	0	161792	0	3	161792	0.00185423	1	161792	0.000618078	1	161792	0.000618078	0	161792	0	1	161792	0.000618078
Aspidisca	0.444135	0.000386298	0.000686699	0.00100438	0.00130886	0.000480727	0.000812577	0	161792	0	2	161792	0.00123616	0	161792	0	1	161792	0.000618078	4	161792	0.00247231	0	161792	0	6	161792	0.00370847	0	161792	0	0	161792	0	2	161792	0.00123616	1	161792	0.000618078	0	161792	0	0	161792	0	0	161792	0
Discomorphella	0.959758	0.000386298	0.00061323	0.000463558	0.000598451	0.000412052	0.000291365	0	161792	0	1	161792	0.000618078	1	161792	0.000618078	3	161792	0.00185423	1	161792	0.000618078	0	161792	0	0	161792	0	0	161792	0	0	161792	0	0	161792	0	0	161792	0	1	161792	0.000618078	1	161792	0.000618078	1	161792	0.000618078
Holosticha	0.40474	0.000309039	0.00081764	0.000231779	0.00061323	0.00260966	0.00632186	0	161792	0	0	161792	0	0	161792	0	0	161792	0	0	161792	0	0	161792	0	0	161792	0	3	161792	0.00185423	0	161792	0	0	161792	0	0	161792	0	0	161792	0	2	161792	0.00123616	0	161792	0
Colpodida_X	0.51239	0.000309039	0.000618078	0.000154519	0.000267635	6.86753e-05	0.000194243	0	161792	0	0	161792	0	1	161792	0.000618078	0	161792	0	0	161792	0	1	161792	0.000618078	0	161792	0	0	161792	0	0	161792	0	0	161792	0	0	161792	0	0	161792	0	0	161792	0	0	161792	0
Campanella	0.171635	0.000309039	0.000535271	0.000695337	0.00108988	0	0	0	161792	0	0	161792	0	1	161792	0.000618078	0	161792	0	3	161792	0.00185423	0	161792	0	0	161792	0	5	161792	0.00309039	0	161792	0	0	161792	0	0	161792	0	0	161792	0	0	161792	0	0	161792	0
Spathidium	0.179204	0.000231779	0.00061323	0.00254957	0.0042535	0.000480727	0.000911081	8	161792	0.00494462	3	161792	0.00185423	0	161792	0	0	161792	0	0	161792	0	1	161792	0.000618078	0	161792	0	21	161792	0.0129796	0	161792	0	0	161792	0	0	161792	0	0	161792	0	0	161792	0	0	161792	0
Sessilida_X	0.419583	0.000231779	0.000430164	0.000772597	0.00140774	0.000206026	0.000582729	0	161792	0	0	161792	0	2	161792	0.00123616	1	161792	0.000618078	0	161792	0	0	161792	0	0	161792	0	7	161792	0.00432654	0	161792	0	0	161792	0	0	161792	0	0	161792	0	0	161792	0	0	161792	0
Entodiniomorphina_1_X	0.201566	0.000154519	0.000267635	0.000386298	0.000430164	0.000686753	0.000794974	2	161792	0.00123616	0	161792	0	0	161792	0	1	161792	0.000618078	1	161792	0.000618078	0	161792	0	1	161792	0.000618078	0	161792	0	0	161792	0	1	161792	0.000618078	4	161792	0.00247231	2	161792	0.00123616	0	161792	0	2	161792	0.00123616
Karotomorpha	0.359309	0.000154519	0.00040882	0.000231779	0.000430164	0.000549402	0.000739655	1	161792	0.000618078	0	161792	0	0	161792	0	2	161792	0.00123616	0	161792	0	0	161792	0	0	161792	0	0	161792	0	0	161792	0	1	161792	0.000618078	4	161792	0.00247231	0	161792	0	1	161792	0.000618078	0	161792	0
Cymbella	0.0337276	7.72597e-05	0.00020441	0.000849857	0.000686699	0.000824103	0.000713694	1	161792	0.000618078	0	161792	0	1	161792	0.000618078	4	161792	0.00247231	1	161792	0.000618078	2	161792	0.00123616	1	161792	0.000618078	1	161792	0.000618078	2	161792	0.00123616	1	161792	0.000618078	1	161792	0.000618078	0	161792	0	0	161792	0	0	161792	0
Epistylis	0.220835	7.72597e-05	0.00020441	0.00896212	0.0191853	0	0	0	161792	0	0	161792	0	0	161792	0	19	161792	0.0117435	0	161792	0	0	161792	0	2	161792	0.00123616	95	161792	0.0587174	0	161792	0	0	161792	0	0	161792	0	0	161792	0	0	161792	0	0	161792	0
Charonina	0.0493503	0	0	0.000231779	0.000299225	0.000618078	0.000713694	0	161792	0	0	161792	0	0	161792	0	0	161792	0	0	161792	0	1	161792	0.000618078	1	161792	0.000618078	1	161792	0.000618078	1	161792	0.000618078	3	161792	0.00185423	1	161792	0.000618078	0	161792	0	0	161792	0	3	161792	0.00185423
[truncated: 33 more columns]

## Sheet: 5B
Supplementry Table 5B : Groupwise mean relative abundance (%) of ciliate genera present at above one percent mean relative frequency in rumen liquor samples.
Genus	p-values	MS: mean rel. freq. (%)	MS: std. dev. (%)	20%MLM: mean rel. freq. (%)	20%MLM: std. dev. (%)	30%MLM: mean rel. freq. (%)	30%MLM: std. dev. (%)
Polyplastron	0.729853	27.6496	10.642	29.9709	9.60305	26.5832	3.01869
Entodinium	7.46701e-06	16.393	6.76617	3.78148	1.28307	4.5496	2.18345
Enoploplastron	0.0344765	11.8864	4.96576	14.5746	4.59426	20.0471	7.16359
Trichostomatia_XX	0.028966	8.7587	2.08691	6.2456	1.49115	6.43638	1.85903
Diploplastron	0.00101905	7.00985	2.50311	9.99972	2.48257	11.9789	1.5454
Epidinium	0.714808	6.48989	4.81231	7.92375	3.14216	7.73469	2.42406
Entodinium_1	6.63701e-07	5.75361	1.16131	2.01849	1.06426	2.06225	0.971623
Eodinium	0.874777	4.13787	1.4951	4.21421	1.21976	3.92019	0.57079
Ophryoscolecidae_1_X	0.000476721	3.47622	1.42855	1.0763	0.543667	1.58084	0.883258
Dasytricha	0.00895576	2.78444	2.08628	7.10001	3.19578	4.78468	1.59617
Isotricha	0.239742	2.06345	1.65942	4.60105	3.58236	4.3332	3.37828
Eremoplastron	0.245849	1.48934	1.33875	2.85436	2.18594	2.03485	0.578953
Metadinium	0.0672373	0.427555	0.475655	1.75202	1.31433	1.93335	1.64429
Diplodinium	0.196692	0.238346	0.427024	2.28689	3.88992	0.527289	0.516746

## Sheet: 5C
Supplementry Table 5C : Groupwise and samplewise mean relative abundance (%) of ciliate species present in rumen liquor samples.
Species	p-values	MS: mean rel. freq. (%)	MS: std. dev. (%)	20%MLM: mean rel. freq. (%)	20%MLM: std. dev. (%)	30%MLM: mean rel. freq. (%)	30%MLM: std. dev. (%)	G21R	G21R: parent seq. count	G21R: rel. freq. (%)	G22R	G22R: parent seq. count	G22R: rel. freq. (%)	G23R	G23R: parent seq. count	G23R: rel. freq. (%)	G24R	G24R: parent seq. count	G24R: rel. freq. (%)	G25R	G25R: parent seq. count	G25R: rel. freq. (%)	G26R	G26R: parent seq. count	G26R: rel. freq. (%)	G27R	G27R: parent seq. count	G27R: rel. freq. (%)	G28R	G28R: parent seq. count	G28R: rel. freq. (%)	G310R	G310R: parent seq. count	G310R: rel. freq. (%)	G31R	G31R: parent seq. count	G31R: rel. freq. (%)	G32R	G32R: parent seq. count	G32R: rel. freq. (%)	G33R	G33R: parent seq. count	G33R: rel. freq. (%)	G34R	G34R: parent seq. count	G34R: rel. freq. (%)	G35R	G35R: parent seq. count	G35R: rel. freq. (%)
Polyplastron_multivesiculatum	0.77156	28.4964	10.713	30.7285	9.79063	27.6367	3.21413	2095308	10000003	20.9531	3671810	10000003	36.7181	2150815	10000003	21.5081	1912433	10000006	19.1243	2962322	10000002	29.6232	4461136	10000005	44.6113	4535655	9999999	45.3566	2793366	10000002	27.9337	2591253	10000001	25.9125	2764113	10000005	27.6411	3074072	10000005	30.7407	2722978	10000004	27.2298	3247158	10000002	32.4716	2686991	10000001	26.8699
Enoploplastron_triloricatum	0.0353821	12.1778	5.09862	14.747	4.4297	20.5074	7.56307	2126598	10000003	21.266	1048418	10000003	10.4842	2121732	10000003	21.2173	1317411	10000006	13.1741	1517317	10000002	15.1732	1681916	10000005	16.8192	1059847	9999999	10.5985	924389	10000002	9.24389	2676750	10000001	26.7675	1522523	10000005	15.2252	1412356	10000005	14.1236	1080274	10000004	10.8027	2017676	10000002	20.1768	2740801	10000001	27.408
Diploplastron_affine	0.00187365	7.27389	2.61436	10.2619	2.69398	12.4261	1.93723	1027822	10000003	10.2782	992684	10000003	9.92684	1439120	10000003	14.3912	991156	10000006	9.91155	719730	10000002	7.1973	665071	10000005	6.65071	930330	9999999	9.3033	1443590	10000002	14.4359	1202435	10000001	12.0243	1018655	10000005	10.1865	813996	10000005	8.13996	1376313	10000004	13.7631	1255397	10000002	12.554	1324540	10000001	13.2454
Trichostomatia_XX_sp_	0.036197	9.10129	2.23887	6.49794	1.70987	6.61173	2.01578	643174	10000003	6.43174	530914	10000003	5.30914	511619	10000003	5.11619	543588	10000006	5.43588	660658	10000002	6.60658	603509	10000005	6.03509	623370	9999999	6.2337	1081518	10000002	10.8152	665637	10000001	6.65637	408017	10000005	4.08017	535723	10000005	5.35723	654547	10000004	6.54547	696474	10000002	6.96474	790515	10000001	7.90515
Epidinium_ecaudatum	0.765313	5.59721	4.22681	6.77448	2.85416	6.39797	1.7534	642099	10000003	6.42099	502962	10000003	5.02962	763921	10000003	7.63921	909281	10000006	9.0928	1254604	10000002	12.546	249303	10000005	2.49303	480838	9999999	4.80838	616580	10000002	6.1658	839911	10000001	8.39911	392343	10000005	3.92343	540080	10000005	5.4008	547096	10000004	5.47096	522653	10000002	5.22653	635422	10000001	6.35422
Eodinium_posterovesiculatum	0.882726	4.22692	1.54489	4.3751	1.27451	4.07042	0.52365	309224	10000003	3.09224	510940	10000003	5.1094	303452	10000003	3.03452	291796	10000006	2.91796	444682	10000002	4.44682	608262	10000005	6.08262	632932	9999999	6.32932	398794	10000002	3.98794	458828	10000001	4.58828	419842	10000005	4.19842	419616	10000005	4.19616	391834	10000004	3.91834	459790	10000002	4.5979	435006	10000001	4.35006
Dasytricha_sp_	0.00555472	1.54385	1.08302	4.00972	1.74327	2.87967	0.863882	273350	10000003	2.7335	407621	10000003	4.07621	478575	10000003	4.78575	719503	10000006	7.19503	551001	10000002	5.51001	105017	10000005	1.05017	357036	9999999	3.57036	315674	10000002	3.15674	198831	10000001	1.98831	284101	10000005	2.84101	348888	10000005	3.48888	442532	10000004	4.42532	221181	10000002	2.21181	134497	10000001	1.34497
Isotricha_intestinalis	0.471794	1.17614	1.32428	2.24859	2.12188	2.3168	2.23155	173539	10000003	1.73539	71577	10000003	0.71577	42607	10000003	0.42607	486327	10000006	4.86327	187175	10000002	1.87175	67560	10000005	0.6756	106658	9999999	1.06658	663430	10000002	6.6343	104168	10000001	1.04168	783385	10000005	7.83385	446436	10000005	4.46436	155376	10000004	1.55376	91720	10000002	0.9172	59412	10000001	0.59412
Entodinium_1_sp_	1.19493e-06	5.98961	1.27292	2.17949	1.06814	2.08928	1.10083	253094	10000003	2.53094	203358	10000003	2.03358	231819	10000003	2.31819	468617	10000006	4.68617	182648	10000002	1.82648	102641	10000005	1.02641	110619	9999999	1.10619	190796	10000002	1.90796	117578	10000001	1.17578	236798	10000005	2.36798	435968	10000005	4.35968	371068	10000004	3.71068	159280	10000002	1.5928	118880	10000001	1.1888
Dasytricha_ruminantium	0.00569143	1.28499	0.971053	3.29572	1.49091	1.98076	0.532932	244663	10000003	2.44663	311939	10000003	3.11939	412770	10000003	4.1277	602661	10000006	6.02661	460752	10000002	4.60752	79895	10000005	0.79895	254452	9999999	2.54452	269446	10000002	2.69446	173595	10000001	1.73595	226443	10000005	2.26443	227462	10000005	2.27462	282969	10000004	2.82969	132629	10000002	1.32629	99981	10000001	0.99981
Metadinium_minorum	0.0784234	0.438656	0.503012	1.80562	1.39565	1.8351	1.57557	12788	10000003	0.12788	19238	10000003	0.19238	438062	10000003	4.38062	212467	10000006	2.12467	239231	10000002	2.39231	284384	10000005	2.84384	39891	9999999	0.39891	198435	10000002	1.98435	38929	10000001	0.38929	489043	10000005	4.89043	280197	10000005	2.80197	49397	10000004	0.49397	288231	10000002	2.88231	329084	10000001	3.29084
Ophryoscolecidae_1_X_sp_	0.000547491	3.66485	1.59495	1.1661	0.581541	1.57859	0.854145	96021	10000003	0.96021	92456	10000003	0.92456	167145	10000003	1.67145	237194	10000006	2.37194	65692	10000002	0.65692	37571	10000005	0.37571	125726	9999999	1.25726	111072	10000002	1.11072	132177	10000001	1.32177	119163	10000005	1.19163	245568	10000005	2.45568	350925	10000004	3.50925	92512	10000002	0.92512	40513	10000001	0.40513
Eremoplastron_dilobum	0.00209853	0.901501	0.323535	1.21631	0.316086	1.51377	0.229993	124764	10000003	1.24764	111694	10000003	1.11694	166636	10000003	1.66636	121256	10000006	1.21256	90645	10000002	0.90645	75764	10000005	0.75764	109261	9999999	1.09261	173029	10000002	1.73029	172237	10000001	1.72237	124425	10000005	1.24425	98793	10000005	0.98793	165843	10000004	1.65843	153112	10000002	1.53112	163637	10000001	1.63637
Entodinium_caudatum	0.000167743	5.46127	2.87418	1.25182	0.466671	1.436	0.98232	97379	10000003	0.97379	147907	10000003	1.47907	107337	10000003	1.07337	192550	10000006	1.9255	93418	10000002	0.93418	79329	10000005	0.79329	80064	9999999	0.80064	203471	10000002	2.03471	73953	10000001	0.73953	140268	10000005	1.40268	169352	10000005	1.69352	406206	10000004	4.06206	143324	10000002	1.43324	87873	10000001	0.87873
Isotricha_prostoma	0.0587642	0.513629	0.289048	0.989062	0.313821	1.24677	0.845285	81592	10000003	0.81592	91607	10000003	0.91607	85779	10000003	0.85779	112260	10000006	1.1226	95342	10000002	0.95342	40400	10000005	0.404	141173	9999999	1.41173	143097	10000002	1.43097	61845	10000001	0.61845	320823	10000005	3.20823	184346	10000005	1.84346	182592	10000004	1.82592	94210	10000002	0.9421	47190	10000001	0.4719
Entodinium_longinucleatum	0.000625077	3.72108	2.093	1.03885	0.562337	1.08532	0.541873	233629	10000003	2.33629	100377	10000003	1.00377	122558	10000003	1.22558	113278	10000006	1.13278	56017	10000002	0.56017	40966	10000005	0.40966	61901	9999999	0.61901	102358	10000002	1.02358	106432	10000001	1.06432	67220	10000005	0.6722	86911	10000005	0.86911	230970	10000004	2.3097	75707	10000002	0.75707	43965	10000001	0.43965
Entodinium_furca	0.000283614	4.37949	2.68688	0.85765	0.350941	0.908905	0.421599	80517	10000003	0.80517	64957	10000003	0.64957	80177	10000003	0.80177	160468	10000006	1.60468	88382	10000002	0.88382	25406	10000005	0.25406	89740	9999999	0.8974	96473	10000002	0.96473	133705	10000001	1.33705	61166	10000005	0.61166	93814	10000005	0.93814	192381	10000004	1.92381	79216	10000002	0.79216	59751	10000001	0.59751
Isotrichidae_2_X_sp_	0.0417578	0.368352	0.237744	0.865855	0.48462	0.661953	0.2711	56130	10000003	0.5613	65919	10000003	0.65919	70728	10000003	0.70728	185930	10000006	1.8593	136817	10000002	1.36817	19747	10000005	0.19747	88665	9999999	0.88665	68748	10000002	0.68748	34515	10000001	0.34515	46794	10000005	0.46794	62411	10000005	0.62411	122614	10000004	1.22614	67899	10000002	0.67899	32082	10000001	0.32082
Eremoplastron_neglectum	0.306718	0.50882	1.11832	1.6735	2.39213	0.557903	0.84955	42776	10000003	0.42776	701793	10000003	7.01793	16579	10000003	0.16579	117296	10000006	1.17296	19012	10000002	0.19012	415599	10000005	4.15599	8431	9999999	0.08431	17314	10000002	0.17314	8318	10000001	0.08318	197756	10000005	1.97756	228876	10000005	2.28876	7582	10000004	0.07582	2490	10000002	0.0249	2659	10000001	0.02659
Diplodinium_anisacanthum	0.193862	0.258937	0.469231	2.3051	3.89747	0.510122	0.491552	1229821	10000003	12.2982	210544	10000003	2.10544	74349	10000003	0.74349	6620	10000006	0.0662	6790	10000002	0.0679	277424	10000005	2.77424	9562	9999999	0.09562	28970	10000002	0.2897	10807	10000001	0.10807	159959	10000005	1.59959	104225	10000005	1.04225	13580	10000004	0.1358	50924	10000002	0.50924	70898	10000001	0.70898
Entodinium_bursa	0.00055837	1.06015	0.481497	0.303846	0.179033	0.456935	0.243278	18672	10000003	0.18672	16748	10000003	0.16748	69200	10000003	0.692	49057	10000006	0.49057	22463	10000002	0.22463	13806	10000005	0.13806	29649	9999999	0.29649	23482	10000002	0.23482	28348	10000001	0.28348	76500	10000005	0.765	48548	10000005	0.48548	92795	10000004	0.92795	40004	10000002	0.40004	13806	10000001	0.13806
Isotricha_sp	0.21028	0.218197	0.120281	0.415172	0.284916	0.324345	0.168692	23934	10000003	0.23934	11373	10000003	0.11373	42550	10000003	0.4255	104847	10000006	1.04847	24613	10000002	0.24613	16183	10000005	0.16183	56469	9999999	0.56469	52169	10000002	0.52169	12505	10000001	0.12505	61053	10000005	0.61053	38533	10000005	0.38533	59751	10000004	0.59751	30045	10000002	0.30045	15447	10000001	0.15447
Epidinium_caudatum	0.908315	0.260139	0.184337	0.289137	0.099461	0.271659	0.0649191	28461	10000003	0.28461	23878	10000003	0.23878	33157	10000003	0.33157	36326	10000006	0.36326	48039	10000002	0.48039	12392	10000005	0.12392	21728	9999999	0.21728	27329	10000002	0.27329	32592	10000001	0.32592	17710	10000005	0.1771	25179	10000005	0.25179	25236	10000004	0.25236	23029	10000002	0.23029	24953	10000001	0.24953
Entodinium_dubardi	2.75879e-07	0.810545	0.196437	0.272869	0.130748	0.244122	0.115453	37401	10000003	0.37401	29536	10000003	0.29536	26367	10000003	0.26367	55621	10000006	0.55621	21501	10000002	0.21501	12844	10000005	0.12844	14089	9999999	0.14089	20936	10000002	0.20936	16635	10000001	0.16635	33667	10000005	0.33667	49170	10000005	0.4917	35760	10000004	0.3576	19295	10000002	0.19295	14768	10000001	0.14768
Blastocystis_sp	0.295053	0.208152	0.132552	0.09223	0.0744541	0.135044	0.177759	13071	10000003	0.13071	27782	10000003	0.27782	5771	10000003	0.05771	5319	10000006	0.05319	5885	10000002	0.05885	5602	10000005	0.05602	4979	9999999	0.04979	5375	10000002	0.05375	62750	10000001	0.6275	5489	10000005	0.05489	4244	10000005	0.04244	5828	10000004	0.05828	6337	10000002	0.06337	3565	10000001	0.03565
Ophryoscolex_purkynjei	0.844421	0.0886225	0.0695581	0.102132	0.0422674	0.0904689	0.0185182	8431	10000003	0.08431	7639	10000003	0.07639	11430	10000003	0.1143	15730	10000006	0.1573	17880	10000002	0.1788	4470	10000005	0.0447	7752	9999999	0.07752	8374	10000002	0.08374	9902	10000001	0.09902	5998	10000005	0.05998	6960	10000005	0.0696	8883	10000004	0.08883	8827	10000002	0.08827	9110	10000001	0.0911
Ophryoscolex_caudatus	0.747316	0.0486612	0.0340213	0.0579987	0.0223382	0.0499811	0.0154686	4810	10000003	0.0481	4357	10000003	0.04357	7129	10000003	0.07129	7922	10000006	0.07922	9902	10000002	0.09902	2490	10000005	0.0249	4131	9999999	0.04131	5658	10000002	0.05658	6224	10000001	0.06224	2659	10000005	0.02659	3848	10000005	0.03848	4527	10000004	0.04527	3904	10000002	0.03904	4583	10000001	0.04583
Eremoplastron_rostratum	0.000273577	0.030625	0.00856043	0.0177512	0.00346606	0.0169756	0.00454942	2037	10000003	0.02037	1188	10000003	0.01188	2150	10000003	0.0215	2094	10000006	0.02094	2037	10000002	0.02037	1697	10000005	0.01697	1301	9999999	0.01301	1697	10000002	0.01697	2320	10000001	0.0232	2207	10000005	0.02207	1697	10000005	0.01697	1641	10000004	0.01641	1924	10000002	0.01924	1245	10000001	0.01245
Pseudoentodinium_elephantis	0.018893	0.00481	0.00318694	0.00962	0.00581807	0.0154656	0.00920955	283	10000003	0.00283	736	10000003	0.00736	1245	10000003	0.01245	1471	10000006	0.01471	1641	10000002	0.01641	57	10000005	0.00057	1641	9999999	0.01641	622	10000002	0.00622	339	10000001	0.00339	396	10000005	0.00396	1358	10000005	0.01358	2376	10000004	0.02376	1301	10000002	0.01301	736	10000001	0.00736
Eudiplodinium_rostratum	0.230856	0.0110325	0.00500556	0.0123062	0.00468004	0.0151522	0.00421603	1132	10000003	0.01132	622	10000003	0.00622	1301	10000003	0.01301	1358	10000006	0.01358	1358	10000002	0.01358	736	10000005	0.00736	1075	9999999	0.01075	2263	10000002	0.02263	1188	10000001	0.01188	1301	10000005	0.01301	1358	10000005	0.01358	1528	10000004	0.01528	1132	10000002	0.01132	962	10000001	0.00962
Polydiniella_mysorea	0.522164	0.013155	0.00465693	0.0130125	0.00315207	0.0151511	0.00412211	1188	10000003	0.01188	1641	10000003	0.01641	1018	10000003	0.01018	1641	10000006	0.01641	1528	10000002	0.01528	792	10000005	0.00792	1018	9999999	0.01018	1584	10000002	0.01584	1245	10000001	0.01245	2094	10000005	0.02094	1528	10000005	0.01528	1980	10000004	0.0198	962	10000002	0.00962	1301	10000001	0.01301
Blastocystis_cycluri	0.425374	0.013015	0.00787179	0.00792125	0.00313826	0.0144589	0.0143182	1358	10000003	0.01358	1075	10000003	0.01075	962	10000003	0.00962	396	10000006	0.00396	622	10000002	0.00622	396	10000005	0.00396	849	9999999	0.00849	679	10000002	0.00679	5319	10000001	0.05319	396	10000005	0.00396	736	10000005	0.00736	962	10000004	0.00962	905	10000002	0.00905	339	10000001	0.00339
Gassovskiella_galea	0.0448592	0.0050925	0.00333381	0.0143575	0.0102485	0.0133256	0.00626242	339	10000003	0.00339	1471	10000003	0.01471	962	10000003	0.00962	3565	10000006	0.03565	2376	10000002	0.02376	226	10000005	0.00226	1415	9999999	0.01415	1132	10000002	0.01132	339	10000001	0.00339	905	10000005	0.00905	1584	10000005	0.01584	2433	10000004	0.02433	1245	10000002	0.01245	622	10000001	0.00622
Pylaiella_sp	0.00159038	0.0069325	0.00207378	0.0071425	0.00206051	0.0117556	0.00321184	679	10000003	0.00679	339	10000003	0.00339	679	10000003	0.00679	622	10000006	0.00622	792	10000002	0.00792	792	10000005	0.00792	1132	9999999	0.01132	679	10000002	0.00679	1811	10000001	0.01811	1132	10000005	0.01132	622	10000005	0.00622	1018	10000004	0.01018	1301	10000002	0.01301	1528	10000001	0.01528
Triadinium_2_caudatum	0.0431347	0.00629375	0.00284776	0.00997125	0.00442804	0.0110022	0.0030769	849	10000003	0.00849	1471	10000003	0.01471	1301	10000003	0.01301	1358	10000006	0.01358	509	10000002	0.00509	226	10000005	0.00226	792	9999999	0.00792	1471	10000002	0.01471	1471	10000001	0.01471	849	10000005	0.00849	849	10000005	0.00849	1245	10000004	0.01245	1075	10000002	0.01075	849	10000001	0.00849
Blastocystis_ratti	0.161823	0.0191687	0.0186302	0.00792125	0.00845402	0.00779555	0.00759552	2603	10000003	0.02603	1697	10000003	0.01697	679	10000003	0.00679	170	10000006	0.0017	339	10000002	0.00339	57	10000005	0.00057	679	9999999	0.00679	113	10000002	0.00113	2716	10000001	0.02716	113	10000005	0.00113	283	10000005	0.00283	509	10000004	0.00509	1075	10000002	0.01075	226	10000001	0.00226
Pinnularia_brebissonii	0.030487	0.0142175	0.00789955	0.00679	0.00466653	0.00591111	0.00519427	849	10000003	0.00849	226	10000003	0.00226	736	10000003	0.00736	1584	10000006	0.01584	396	10000002	0.00396	1132	10000005	0.01132	396	9999999	0.00396	113	10000002	0.00113	1415	10000001	0.01415	339	10000005	0.00339	113	10000005	0.00113	1132	10000004	0.01132	1358	10000002	0.01358	170	10000001	0.0017
Blepharocorys_microcorys	0.288921	0.00756875	0.00449099	0.00601	0.00425281	0.0044	0.00236879	509	10000003	0.00509	453	10000003	0.00453	226	10000003	0.00226	1584	10000006	0.01584	962	10000002	0.00962	339	10000005	0.00339	339	9999999	0.00339	396	10000002	0.00396	339	10000001	0.00339	679	10000005	0.00679	679	10000005	0.00679	736	10000004	0.00736	622	10000002	0.00622	113	10000001	0.00113
Nyctotheroides_hubeiensis	0.00149595	0.00113125	0.000631693	0.00155625	0.0014628	0.00345667	0.0011772	113	10000003	0.00113	0	10000003	0	453	10000003	0.00453	57	10000006	0.00057	113	10000002	0.00113	57	10000005	0.00057	113	9999999	0.00113	339	10000002	0.00339	283	10000001	0.00283	453	10000005	0.00453	113	10000005	0.00113	396	10000004	0.00396	509	10000002	0.00509	339	10000001	0.00339
Tetrahymenida_X_sp_	0.822108	0.0017675	0.00316861	0.00141375	0.00202008	0.00301778	0.0079432	0	10000003	0	0	10000003	0	0	10000003	0	0	10000006	0	226	10000002	0.00226	0	10000005	0	339	9999999	0.00339	566	10000002	0.00566	2546	10000001	0.02546	0	10000005	0	0	10000005	0	0	10000004	0	0	10000002	0	113	10000001	0.00113
Metadinium_medium	0.137911	0.00084875	0.000799475	0.00940625	0.0137466	0.00301778	0.00328937	905	10000003	0.00905	4074	10000003	0.04074	0	10000003	0	396	10000006	0.00396	0	10000002	0	2150	10000005	0.0215	0	9999999	0	0	10000002	0	509	10000001	0.00509	736	10000005	0.00736	962	10000005	0.00962	0	10000004	0	113	10000002	0.00113	113	10000001	0.00113
Blepharocorys_curvigula	0.32472	0.00184	0.00108382	0.00325375	0.00218658	0.00301778	0.00206755	113	10000003	0.00113	509	10000003	0.00509	57	10000003	0.00057	566	10000006	0.00566	283	10000002	0.00283	283	10000005	0.00283	679	9999999	0.00679	113	10000002	0.00113	113	10000001	0.00113	396	10000005	0.00396	736	10000005	0.00736	566	10000004	0.00566	226	10000002	0.00226	113	10000001	0.00113
Blastocystis_Group_X_sp_	0.383576	0.00403125	0.00247399	0.00261875	0.00220869	0.00276555	0.00147187	453	10000003	0.00453	736	10000003	0.00736	170	10000003	0.0017	57	10000006	0.00057	57	10000002	0.00057	113	10000005	0.00113	339	9999999	0.00339	170	10000002	0.0017	566	10000001	0.00566	226	10000005	0.00226	170	10000005	0.0017	283	10000004	0.00283	170	10000002	0.0017	226	10000001	0.00226
Allas_diplophysa	0.320324	0.00650625	0.00588049	0.00424375	0.00498924	0.00264111	0.00344526	622	10000003	0.00622	283	10000003	0.00283	1641	10000003	0.01641	453	10000006	0.00453	113	10000002	0.00113	57	10000005	0.00057	226	9999999	0.00226	0	10000002	0	1188	10000001	0.01188	339	10000005	0.00339	57	10000005	0.00057	0	10000004	0	283	10000002	0.00283	57	10000001	0.00057
Balantidium_ctenopharyngodoni	0.00822474	0.00028375	0.000400404	0.00113125	0.00109476	0.00226222	0.00148421	0	10000003	0	0	10000003	0	339	10000003	0.00339	170	10000006	0.0017	170	10000002	0.0017	0	10000005	0	113	9999999	0.00113	113	10000002	0.00113	0	10000001	0	113	10000005	0.00113	113	10000005	0.00113	283	10000004	0.00283	453	10000002	0.00453	57	10000001	0.00057
Euplotes_daidaleos	0.503372	0.0123787	0.0286333	0.00813375	0.00547252	0.00220111	0.00372907	1811	10000003	0.01811	226	10000003	0.00226	453	10000003	0.00453	905	10000006	0.00904999	1528	10000002	0.01528	566	10000005	0.00566	226	9999999	0.00226	792	10000002	0.00792	1245	10000001	0.01245	0	10000005	0	57	10000005	0.00057	57	10000004	0.00057	0	10000002	0	0	10000001	0
Carchesium_polypinum	0.348865	0.0119525	0.0250867	0.0026175	0.00135471	0.00194889	0.00241735	396	10000003	0.00396	170	10000003	0.0017	453	10000003	0.00453	283	10000006	0.00283	226	10000002	0.00226	113	10000005	0.00113	396	9999999	0.00396	57	10000002	0.00057	736	10000001	0.00736	0	10000005	0	57	10000005	0.00057	0	10000004	0	226	10000002	0.00226	0	10000001	0
Amphileptus_dragescoi	0.223834	7.12499e-05	0.00018851	0.00035375	0.000935934	0.00188667	0.0034262	0	10000003	0	0	10000003	0	283	10000003	0.00283	0	10000006	0	0	10000002	0	0	10000005	0	0	9999999	0	0	10000002	0	1075	10000001	0.01075	57	10000005	0.00057	113	10000005	0.00113	0	10000004	0	0	10000002	0	0	10000001	0
Macropodinium_yalabense	0.240234	0.00099125	0.000547709	0.00183875	0.0013183	0.00182333	0.00112493	113	10000003	0.00113	509	10000003	0.00509	170	10000003	0.0017	57	10000006	0.00057	170	10000002	0.0017	113	10000005	0.00113	226	9999999	0.00226	113	10000002	0.00113	170	10000001	0.0017	170	10000005	0.0017	283	10000005	0.00283	113	10000004	0.00113	0	10000002	0	113	10000001	0.00113
Neobalantidium_coli_21_sp_	0.513101	0.00141375	0.00105735	0.00205	0.00152016	0.00138333	0.00103543	226	10000003	0.00226	0	10000003	0	339	10000003	0.00339	396	10000006	0.00396	339	10000002	0.00339	57	10000005	0.00057	0	9999999	0	283	10000002	0.00283	113	10000001	0.00113	0	10000005	0	0	10000005	0	339	10000004	0.00339	170	10000002	0.0017	226	10000001	0.00226
Buxtonella_sulcata	0.0963897	0.00375	0.00349828	0.00212125	0.00143427	0.00113111	0.00103094	396	10000003	0.00396	396	10000003	0.00396	57	10000003	0.00057	226	10000006	0.00226	170	10000002	0.0017	339	10000005	0.00339	0	9999999	0	113	10000002	0.00113	0	10000001	0	57	10000005	0.00057	0	10000005	0	113	10000004	0.00113	339	10000002	0.00339	113	10000001	0.00113
Schizocalyptra_sinica	0.13533	0.00099	0.000835015	0.0002125	0.000393788	0.00100667	0.00105703	0	10000003	0	57	10000003	0.00057	113	10000003	0.00113	0	10000006	0	0	10000002	0	0	10000005	0	0	9999999	0	0	10000002	0	339	10000001	0.00339	57	10000005	0.00057	0	10000005	0	226	10000004	0.00226	57	10000002	0.00057	113	10000001	0.00113
Blastocystis_geocheloni	0.828477	0.00070875	0.000788692	0.00078	0.000628927	0.000944444	0.000843249	0	10000003	0	170	10000003	0.0017	113	10000003	0.00113	57	10000006	0.00057	57	10000002	0.00057	0	10000005	0	57	9999999	0.00057	170	10000002	0.0017	283	10000001	0.00283	0	10000005	0	113	10000005	0.00113	57	10000004	0.00057	170	10000002	0.0017	57	10000001	0.00057
Blepharocorys_jubata	0.521265	0.00028375	0.000400404	0.00084875	0.00105669	0.000818889	0.00136371	0	10000003	0	0	10000003	0	57	10000003	0.00057	339	10000006	0.00339	113	10000002	0.00113	0	10000005	0	113	9999999	0.00113	57	10000002	0.00057	57	10000001	0.00057	113	10000005	0.00113	0	10000005	0	453	10000004	0.00453	57	10000002	0.00057	0	10000001	0
Cyclospora_cayetanensis	0.974698	0.0007075	0.00149136	0.0006375	0.000998283	0.000816667	0.00194259	0	10000003	0	0	10000003	0	283	10000003	0.00283	170	10000006	0.0017	0	10000002	0	0	10000005	0	0	9999999	0	57	10000002	0.00057	0	10000001	0	0	10000005	0	0	10000005	0	113	10000004	0.00113	0	10000002	0	0	10000001	0
Colpoda_steinii	0.97215	0.00099	0.00261929	0.00091875	0.00132406	0.000755555	0.00174953	0	10000003	0	113	10000003	0.00113	0	10000003	0	0	10000006	0	0	10000002	0	0	10000005	0	339	9999999	0.00339	283	10000002	0.00283	0	10000001	0	0	10000005	0	57	10000005	0.00057	566	10000004	0.00566	0	10000002	0	0	10000001	0
MAST_12_X_sp_	0.354031	0.0046675	0.00871912	0.00452625	0.00554426	0.000754444	0.000799557	1188	10000003	0.01188	0	10000003	0	509	10000003	0.00509	1528	10000006	0.01528	0	10000002	0	283	10000005	0.00283	113	9999999	0.00113	0	10000002	0	0	10000001	0	113	10000005	0.00113	57	10000005	0.00057	113	10000004	0.00113	0	10000002	0	0	10000001	0
Phialina_caudata	0.155618	0.00240375	0.003355	0.000355	0.00039424	0.000692222	0.00127296	0	10000003	0	57	10000003	0.00057	57	10000003	0.00057	0	10000006	0	113	10000002	0.00113	0	10000005	0	57	9999999	0.00057	0	10000002	0	396	10000001	0.00396	0	10000005	0	57	10000005	0.00057	0	10000004	0	0	10000002	0	0	10000001	0
Macropodinium_ennuensis	0.760995	0.000425	0.00061713	0.00042625	0.000548998	0.00063	0.000675935	0	10000003	0	0	10000003	0	170	10000003	0.0017	0	10000006	0	57	10000002	0.00057	57	10000005	0.00057	57	9999999	0.00057	0	10000002	0	0	10000001	0	226	10000005	0.00226	113	10000005	0.00113	57	10000004	0.00057	0	10000002	0	0	10000001	0
Discomorphella_pedroenasi	0.883685	0.000425	0.0007342	0.000355	0.00039424	0.000504444	0.000562872	0	10000003	0	57	10000003	0.00057	0	10000003	0	0	10000006	0	57	10000002	0.00057	113	10000005	0.00113	0	9999999	0	57	10000002	0.00057	0	10000001	0	0	10000005	0	0	10000005	0	0	10000004	0	113	10000002	0.00113	57	10000001	0.00057
Charonina_ventriculi	0.0333614	0	0	0.0004975	0.000339365	0.000504444	0.000562872	57	10000003	0.00057	57	10000003	0.00057	57	10000003	0.00057	57	10000006	0.00057	0	10000002	0	57	10000005	0.00057	0	9999999	0	113	10000002	0.00113	57	10000001	0.00057	113	10000005	0.00113	170	10000005	0.0017	0	10000004	0	0	10000002	0	57	10000001	0.00057
Cercomonas_lenta	0.544545	0.0002125	0.000562222	0.00070625	0.000968361	0.000503333	0.000902503	0	10000003	0	0	10000003	0	226	10000003	0.00226	0	10000006	0	0	10000002	0	0	10000005	0	113	9999999	0.00113	226	10000002	0.00226	283	10000001	0.00283	57	10000005	0.00057	0	10000005	0	0	10000004	0	0	10000002	0	0	10000001	0
Mischococcus_sphaerocephalus	0.488199	0.0005675	0.000694023	0.0002125	0.000393787	0.000503333	0.000622593	57	10000003	0.00057	0	10000003	0	0	10000003	0	113	10000006	0.00113	0	10000002	0	0	10000005	0	0	9999999	0	0	10000002	0	0	10000001	0	0	10000005	0	113	10000005	0.00113	0	10000004	0	57	10000002	0.00057	0	10000001	0
Palmarella_salina	0.516513	0.0002125	0.000393788	0.0002125	0.000393788	0.000442222	0.000519568	113	10000003	0.00113	57	10000003	0.00057	0	10000003	0	0	10000006	0	0	10000002	0	0	10000005	0	0	9999999	0	0	10000002	0	170	10000001	0.0017	57	10000005	0.00057	0	10000005	0	57	10000004	0.00057	57	10000002	0.00057	57	10000001	0.00057
Pseudoplatynematum_denticulatum	0.915987	0.00035375	0.000629065	0.000355	0.00039424	0.000442222	0.000356114	113	10000003	0.00113	57	10000003	0.00057	0	10000003	0	0	10000006	0	0	10000002	0	57	10000005	0.00057	0	9999999	0	57	10000002	0.00057	57	10000001	0.00057	57	10000005	0.00057	0	10000005	0	57	10000004	0.00057	57	10000002	0.00057	0	10000001	0
Loxophyllum_planum	0.492541	0.00042625	0.000374664	0.00021375	0.00027595	0.000378889	0.000377784	0	10000003	0	0	10000003	0	0	10000003	0	57	10000006	0.00057	57	10000002	0.00057	0	10000005	0	0	9999999	0	57	10000002	0.00057	0	10000001	0	57	10000005	0.00057	0	10000005	0	57	10000004	0.00057	57	10000002	0.00057	0	10000001	0
Entodiniomorphina_1_X_sp_	0.147955	0.00028375	0.000400404	0.00134375	0.00178804	0.000378889	0.000534653	566	10000003	0.00566	57	10000003	0.00057	226	10000003	0.00226	0	10000006	0	113	10000002	0.00113	0	10000005	0	113	9999999	0.00113	0	10000002	0	0	10000001	0	0	10000005	0	57	10000005	0.00057	170	10000004	0.0017	57	10000002	0.00057	0	10000001	0
Schizocalyptra_similis	0.57351	0.00028375	0.000400404	0.00056625	0.00063281	0.000377778	0.000461779	0	10000003	0	0	10000003	0	0	10000003	0	113	10000006	0.00113	170	10000002	0.0017	0	10000005	0	113	9999999	0.00113	57	10000002	0.00057	0	10000001	0	57	10000005	0.00057	0	10000005	0	0	10000004	0	113	10000002	0.00113	0	10000001	0
Karotomorpha_sp_	0.934702	0.000355	0.00039424	0.00028375	0.000566876	0.000376667	0.000532687	0	10000003	0	170	10000003	0.0017	0	10000003	0	0	10000006	0	0	10000002	0	0	10000005	0	57	9999999	0.00057	0	10000002	0	113	10000001	0.00113	0	10000005	0	0	10000005	0	0	10000004	0	113	10000002	0.00113	0	10000001	0
Epicarchesium_abrae	0.553039	0.0011325	0.00238513	0.00084875	0.000894531	0.000315556	0.000388075	283	10000003	0.00283	0	10000003	0	0	10000003	0	57	10000006	0.00057	113	10000002	0.00113	0	10000005	0	113	9999999	0.00113	113	10000002	0.00113	113	10000001	0.00113	0	10000005	0	0	10000005	0	0	10000004	0	57	10000002	0.00057	0	10000001	0
Haplomyxa_saranae	0.933417	0.000355	0.000562538	0.000425	0.0007342	0.000315555	0.000388075	0	10000003	0	226	10000003	0.00226	0	10000003	0	57	10000006	0.00057	0	10000002	0	0	10000005	0	0	9999999	0	57	10000002	0.00057	0	10000001	0	57	10000005	0.00057	57	10000005	0.00057	0	10000004	0	113	10000002	0.00113	0	10000001	0
Ectocarpus_fasciculatus	0.96205	0.000355	0.00039424	0.00028375	0.000566876	0.000314444	0.000470085	0	10000003	0	0	10000003	0	0	10000003	0	57	10000006	0.00057	0	10000002	0	0	10000005	0	0	9999999	0	170	10000002	0.0017	113	10000001	0.00113	0	10000005	0	0	10000005	0	113	10000004	0.00113	0	10000002	0	0	10000001	0
Balantidium_polyvacuolum	0.645322	0.000425	0.0007342	0.00049625	0.00044136	0.000253333	0.000283235	0	10000003	0	57	10000003	0.00057	57	10000003	0.00057	57	10000006	0.00057	113	10000002	0.00113	0	10000005	0	0	9999999	0	113	10000002	0.00113	0	10000001	0	0	10000005	0	57	10000005	0.00057	57	10000004	0.00057	0	10000002	0	0	10000001	0
Olpidophydiales_X_sp_	0.222168	0.0001425	0.000246817	0	0	0.000252222	0.000387894	0	10000003	0	0	10000003	0	0	10000003	0	0	10000006	0	0	10000002	0	0	10000005	0	0	9999999	0	0	10000002	0	57	10000001	0.00057	0	10000005	0	0	10000005	0	0	10000004	0	57	10000002	0.00057	0	10000001	0
Vorticella_gracilis	0.221878	0	0	0.00063625	0.00110992	0.000252222	0.000387894	0	10000003	0	339	10000003	0.00339	57	10000003	0.00057	113	10000006	0.00113	0	10000002	0	0	10000005	0	0	9999999	0	0	10000002	0	0	10000001	0	0	10000005	0	57	10000005	0.00057	0	10000004	0	113	10000002	0.00113	0	10000001	0
Colpoda_maupasi	0.0450958	0.003535	0.0036517	0.0011325	0.0022096	0.000251111	0.000469786	679	10000003	0.00679	0	10000003	0	170	10000003	0.0017	57	10000006	0.00057	0	10000002	0	0	10000005	0	0	9999999	0	0	10000002	0	0	10000001	0	0	10000005	0	0	10000005	0	0	10000004	0	113	10000002	0.00113	0	10000001	0
Blepharocorys_angusta	0.641573	0.000355	0.000562539	0.00014125	0.000373712	0.000188889	0.000377225	0	10000003	0	0	10000003	0	113	10000003	0.00113	0	10000006	0	0	10000002	0	0	10000005	0	0	9999999	0	0	10000002	0	0	10000001	0	0	10000005	0	0	10000005	0	113	10000004	0.00113	0	10000002	0	0	10000001	0
Didinium_nasutum	0.259157	0.00028375	0.000400404	0	0	0.000188889	0.000377225	0	10000003	0	0	10000003	0	0	10000003	0	0	10000006	0	0	10000002	0	0	10000005	0	0	9999999	0	0	10000002	0	0	10000001	0	113	10000005	0.00113	0	10000005	0	0	10000004	0	57	10000002	0.00057	0	10000001	0
Opalina_undulata	0.68876	0.00028375	0.000566876	0.0001425	0.000246817	0.000126667	0.000236972	0	10000003	0	0	10000003	0	0	10000003	0	0	10000006	0	0	10000002	0	0	10000005	0	57	9999999	0.00057	57	10000002	0.00057	0	10000001	0	0	10000005	0	0	10000005	0	0	10000004	0	57	10000002	0.00057	0	10000001	0
Dictyocha_octonaria	0.531751	0.00021375	0.00027595	7.125e-05	0.00018851	0.000126667	0.000236972	0	10000003	0	0	10000003	0	0	10000003	0	0	10000006	0	0	10000002	0	0	10000005	0	57	9999999	0.00057	0	10000002	0	0	10000001	0	0	10000005	0	0	10000005	0	0	10000004	0	0	10000002	0	57	10000001	0.00057
Parvilucifera_multicavata	0.881455	0.00014125	0.000373712	7.125e-05	0.00018851	0.000126667	0.000236972	0	10000003	0	0	10000003	0	0	10000003	0	0	10000006	0	0	10000002	0	0	10000005	0	0	9999999	0	57	10000002	0.00057	0	10000001	0	0	10000005	0	0	10000005	0	57	10000004	0.00057	0	10000002	0	0	10000001	0
Stentor_roeselii	0.236001	0.00721499	0.0136036	0.003465	0.00212396	0.000126667	0.000236972	509	10000003	0.00509	509	10000003	0.00509	226	10000003	0.00226	453	10000006	0.00453	57	10000002	0.00057	396	10000005	0.00396	0	9999999	0	622	10000002	0.00622	0	10000001	0	0	10000005	0	0	10000005	0	57	10000004	0.00057	0	10000002	0	0	10000001	0
Aspidisca_orthopogon	0.53175	7.12499e-05	0.00018851	0.00021375	0.00027595	0.000126667	0.000236972	0	10000003	0	0	10000003	0	0	10000003	0	57	10000006	0.00057	0	10000002	0	0	10000005	0	57	9999999	0.00057	57	10000002	0.00057	0	10000001	0	0	10000005	0	57	10000005	0.00057	0	10000004	0	0	10000002	0	0	10000001	0
RAD_B_X_Group_Ib_X_sp_	0.602558	7.125e-05	0.00018851	0	0	0.000125556	0.000355125	0	10000003	0	0	10000003	0	0	10000003	0	0	10000006	0	0	10000002	0	0	10000005	0	0	9999999	0	0	10000002	0	0	10000001	0	0	10000005	0	0	10000005	0	0	10000004	0	0	10000002	0	113	10000001	0.00113
Stentor_muelleri	0.241713	7.12499e-05	0.00018851	0.00028375	0.000400404	6.33333e-05	0.000179134	0	10000003	0	0	10000003	0	0	10000003	0	57	10000006	0.00057	113	10000002	0.00113	57	10000005	0.00057	0	9999999	0	0	10000002	0	57	10000001	0.00057	0	10000005	0	0	10000005	0	0	10000004	0	0	10000002	0	0	10000001	0
Colpoda_sp_	0.00985966	0.00190875	0.00171917	0.000565	0.00079903	6.33333e-05	0.000179134	226	10000003	0.00226	0	10000003	0	0	10000003	0	113	10000006	0.00113	0	10000002	0	0	10000005	0	113	9999999	0.00113	0	10000002	0	0	10000001	0	0	10000005	0	0	10000005	0	0	10000004	0	57	10000002	0.00057	0	10000001	0
Circodinium_minimum	0.477806	0.0001425	0.000246817	0.00021375	0.00027595	6.33333e-05	0.000179134	0	10000003	0	0	10000003	0	57	10000003	0.00057	57	10000006	0.00057	0	10000002	0	0	10000005	0	57	9999999	0.00057	0	10000002	0	0	10000001	0	0	10000005	0	0	10000005	0	0	10000004	0	57	10000002	0.00057	0	10000001	0
Exocolpoda_augustini	0.423103	7.125e-05	0.00018851	0.00028375	0.000566876	6.33333e-05	0.000179134	0	10000003	0	0	10000003	0	57	10000003	0.00057	0	10000006	0	0	10000002	0	0	10000005	0	0	9999999	0	170	10000002	0.0017	0	10000001	0	0	10000005	0	0	10000005	0	57	10000004	0.00057	0	10000002	0	0	10000001	0
Ophryoglena_catenula	0.628329	0	0	7.125e-05	0.00018851	6.33333e-05	0.000179134	57	10000003	0.00057	0	10000003	0	0	10000003	0	0	10000006	0	0	10000002	0	0	10000005	0	0	9999999	0	0	10000002	0	0	10000001	0	0	10000005	0	0	10000005	0	57	10000004	0.00057	0	10000002	0	0	10000001	0
Noctilucales_X_sp_	0.733535	0.0001425	0.000246817	0.0001425	0.000246817	6.33333e-05	0.000179134	0	10000003	0	0	10000003	0	57	10000003	0.00057	0	10000006	0	0	10000002	0	0	10000005	0	0	9999999	0	57	10000002	0.00057	0	10000001	0	57	10000005	0.00057	0	10000005	0	0	10000004	0	0	10000002	0	0	10000001	0
Anteholosticha_gracilis	0.230094	0.0002125	0.000393788	0.000495	0.00086872	0	0	0	10000003	0	0	10000003	0	170	10000003	0.0017	0	10000006	0	226	10000002	0.00226	0	10000005	0	0	9999999	0	0	10000002	0	0	10000001	0	0	10000005	0	0	10000005	0	0	10000004	0	0	10000002	0	0	10000001	0
Ophrydium_versatile	0.15275	0.0011325	0.00185591	0.000355	0.000562539	0	0	0	10000003	0	170	10000003	0.0017	57	10000003	0.00057	0	10000006	0	0	10000002	0	0	10000005	0	57	9999999	0.00057	0	10000002	0	0	10000001	0	0	10000005	0	0	10000005	0	0	10000004	0	0	10000002	0	0	10000001	0
Euplotes_patella	0.396224	0.0012025	0.00297194	0.00035375	0.000484457	0	0	113	10000003	0.00113	0	10000003	0	113	10000003	0.00113	0	10000006	0	0	10000002	0	0	10000005	0	0	9999999	0	57	10000002	0.00057	0	10000001	0	0	10000005	0	0	10000005	0	0	10000004	0	0	10000002	0	0	10000001	0
Halodinium_verrucatum	0.370655	0.000495	0.00111	0.00028375	0.000400404	0	0	0	10000003	0	0	10000003	0	0	10000003	0	57	10000006	0.00057	113	10000002	0.00113	0	10000005	0	0	9999999	0	57	10000002	0.00057	0	10000001	0	0	10000005	0	0	10000005	0	0	10000004	0	0	10000002	0	0	10000001	0
Epistylis_chlorelligerum	0.105684	0	0	0.0001425	0.000246817	0	0	0	10000003	0	0	10000003	0	0	10000003	0	57	10000006	0.00057	0	10000002	0	0	10000005	0	57	9999999	0.00057	0	10000002	0	0	10000001	0	0	10000005	0	0	10000005	0	0	10000004	0	0	10000002	0	0	10000001	0
Cyrtolophosis_mucicola	0.0204896	0.0007075	0.000836282	7.125e-05	0.00018851	0	0	0	10000003	0	0	10000003	0	0	10000003	0	0	10000006	0	0	10000002	0	0	10000005	0	57	9999999	0.00057	0	10000002	0	0	10000001	0	0	10000005	0	0	10000005	0	0	10000004	0	0	10000002	0	0	10000001	0
Pseudocyclidium_longum	0.101574	0.00028375	0.000400404	7.125e-05	0.00018851	0	0	0	10000003	0	0	10000003	0	0	10000003	0	0	10000006	0	57	10000002	0.00057	0	10000005	0	0	9999999	0	0	10000002	0	0	10000001	0	0	10000005	0	0	10000005	0	0	10000004	0	0	10000002	0	0	10000001	0
Amphileptus_aeschtae	0.182275	0.00587	0.011832	0	0	0	0	0	10000003	0	0	10000003	0	0	10000003	0	0	10000006	0	0	10000002	0	0	10000005	0	0	9999999	0	0	10000002	0	0	10000001	0	0	10000005	0	0	10000005	0	0	10000004	0	0	10000002	0	0	10000001	0
Filosa_Sarcomonadea_XXX_sp_	0.000992988	0.00085	0.000749316	0	0	0	0	0	10000003	0	0	10000003	0	0	10000003	0	0	10000006	0	0	10000002	0	0	10000005	0	0	9999999	0	0	10000002	0	0	10000001	0	0	10000005	0	0	10000005	0	0	10000004	0	0	10000002	0	0	10000001	0
[truncated: 33 more columns]

## Sheet: 5D
Supplementry Table 5D : Groupwise mean relative abundance (%) of ciliate species present at above one percent mean relative frequency in rumen liquor samples.
Species	p-values	MS: mean rel. freq. (%)	MS: std. dev. (%)	20%MLM: mean rel. freq. (%)	20%MLM: std. dev. (%)	30%MLM: mean rel. freq. (%)	30%MLM: std. dev. (%)
Polyplastron_multivesiculatum	0.77156	28.4964	10.713	30.7285	9.79063	27.6367	3.21413
Enoploplastron_triloricatum	0.0353821	12.1778	5.09862	14.747	4.4297	20.5074	7.56307
Trichostomatia_XX_sp	0.036197	9.10129	2.23887	6.49794	1.70987	6.61173	2.01578
Diploplastron_affine	0.00187365	7.27389	2.61436	10.2619	2.69398	12.4261	1.93723
Entodinium_1_sp	1.19493e-06	5.98961	1.27292	2.17949	1.06814	2.08928	1.10083
Epidinium_ecaudatum	0.765313	5.59721	4.22681	6.77448	2.85416	6.39797	1.7534
Entodinium_caudatum	0.000167743	5.46127	2.87418	1.25182	0.466671	1.436	0.98232
Entodinium_furca	0.000283614	4.37949	2.68688	0.85765	0.350941	0.908905	0.421599
Eodinium_posterovesiculatum	0.882726	4.22692	1.54489	4.3751	1.27451	4.07042	0.52365
Entodinium_longinucleatum	0.000625077	3.72108	2.093	1.03885	0.562337	1.08532	0.541873
Ophryoscolecidae_1_X_sp	0.000547491	3.66485	1.59495	1.1661	0.581541	1.57859	0.854145
Dasytricha_sp	0.00555472	1.54385	1.08302	4.00972	1.74327	2.87967	0.863882
Dasytricha_ruminantium	0.00569143	1.28499	0.971053	3.29572	1.49091	1.98076	0.532932
Isotricha_intestinalis	0.471794	1.17614	1.32428	2.24859	2.12188	2.3168	2.23155
Entodinium_bursa	0.00055837	1.06015	0.481497	0.303846	0.179033	0.456935	0.243278
Eremoplastron_dilobum	0.00209853	0.901501	0.323535	1.21631	0.316086	1.51377	0.229993
Isotricha_prostoma	0.05	0.513629	0.289048	0.989062	0.313821	1.24677	0.845285
Eremoplastron_neglectum	0.306718	0.50882	1.11832	1.6735	2.39213	0.557903	0.84955
Metadinium_minorum	0.0784234	0.438656	0.503012	1.80562	1.39565	1.8351	1.57557
Diplodinium_anisacanthum	0.193862	0.258937	0.469231	2.3051	3.89747	0.510122	0.491552

## Sheet: 5E
Supplementry Table 5E : Groupwise and samplewise mean relative abundance (%) of ciliate genera present in fecal samples.
Genus	p-values	MS: mean rel. freq. (%)	MS: std. dev. (%)	20%MLM: mean rel. freq. (%)	20%MLM: std. dev. (%)	30%MLM: mean rel. freq. (%)	30%MLM: std. dev. (%)	2G11F	2G11F: parent seq. count	2G11F: rel. freq. (%)	2G13F	2G13F: parent seq. count	2G13F: rel. freq. (%)	2G14F	2G14F: parent seq. count	2G14F: rel. freq. (%)	2G15F	2G15F: parent seq. count	2G15F: rel. freq. (%)	2G16F	2G16F: parent seq. count	2G16F: rel. freq. (%)	2G18F	2G18F: parent seq. count	2G18F: rel. freq. (%)	2G19F	2G19F: parent seq. count	2G19F: rel. freq. (%)	2G21F	2G21F: parent seq. count	2G21F: rel. freq. (%)	2G22F	2G22F: parent seq. count	2G22F: rel. freq. (%)	2G23F	2G23F: parent seq. count	2G23F: rel. freq. (%)	2G24F	2G24F: parent seq. count	2G24F: rel. freq. (%)	2G25F	2G25F: parent seq. count	2G25F: rel. freq. (%)	2G26F	2G26F: parent seq. count	2G26F: rel. freq. (%)	2G27F	2G27F: parent seq. count	2G27F: rel. freq. (%)
Blastocystis	0.270845	97.9854	0.78303	85.8592	26.4937	97.3315	0.945606	259623	264996	97.9724	255500	264996	96.4165	259246	264996	97.8302	261511	264996	98.6849	262455	264996	99.0411	258790	264996	97.6581	260476	264996	98.2943	253007	264996	95.4758	260824	264996	98.4256	259965	264996	98.1015	34453	264996	13.0013	258504	264996	97.5502	257159	264996	97.0426	205963	264996	77.7231
Stephanodiscus	0.945013	0.340868	0.140541	0.378119	0.298648	0.355058	0.137482	487	264996	0.183776	1205	264996	0.454724	1269	264996	0.478875	1020	264996	0.384911	532	264996	0.200758	446	264996	0.168304	1364	264996	0.514725	3085	264996	1.16417	1043	264996	0.393591	1074	264996	0.405289	71	264996	0.0267929	968	264996	0.365289	876	264996	0.330571	619	264996	0.233588
Blastocystis_Group_X	0.73485	0.329547	0.197916	0.426715	0.224947	0.405708	0.27346	1600	264996	0.603783	542	264996	0.204531	1112	264996	0.419629	308	264996	0.116228	458	264996	0.172833	1629	264996	0.614726	464	264996	0.175097	873	264996	0.329439	533	264996	0.201135	607	264996	0.22906	336	264996	0.126794	1208	264996	0.455856	1437	264996	0.542272	1105	264996	0.416987
Polyplastron	0.256505	0.274128	0.244842	3.99993	8.04882	0.404912	0.252256	479	264996	0.180757	2133	264996	0.804918	406	264996	0.15321	282	264996	0.106417	158	264996	0.0596235	1180	264996	0.44529	447	264996	0.168682	1093	264996	0.412459	413	264996	0.155851	1014	264996	0.382647	68325	264996	25.7834	999	264996	0.376987	1461	264996	0.551329	20752	264996	7.83106
Enoploplastron	0.203711	0.148035	0.152695	0.974899	1.65532	0.159877	0.0936255	490	264996	0.184908	1303	264996	0.491706	427	264996	0.161135	94	264996	0.0354722	43	264996	0.0162267	286	264996	0.107926	103	264996	0.0388685	1187	264996	0.447931	199	264996	0.0750955	240	264996	0.0905674	13856	264996	5.22876	336	264996	0.126794	634	264996	0.239249	6248	264996	2.35777
Schizocalyptra	0.865721	0.0806481	0.0065725	0.0793723	0.0304464	0.0846973	0.0139835	214	264996	0.0807559	227	264996	0.0856617	226	264996	0.0852843	183	264996	0.0690576	202	264996	0.0762276	205	264996	0.0773597	239	264996	0.09019	181	264996	0.0683029	186	264996	0.0701897	172	264996	0.0649066	29	264996	0.0109436	270	264996	0.101888	316	264996	0.119247	194	264996	0.0732087
Entodinium	0.403279	0.0705671	0.0568839	1.72862	4.38803	0.158954	0.137997	102	264996	0.0384911	520	264996	0.196229	137	264996	0.0516989	110	264996	0.0415101	58	264996	0.0218871	280	264996	0.105662	102	264996	0.0384911	963	264996	0.363402	77	264996	0.029057	94	264996	0.0354722	37420	264996	14.121	257	264996	0.0969826	129	264996	0.04868	2115	264996	0.798125
Eodinium	0.222635	0.0702436	0.0488068	0.6198	1.13412	0.0820977	0.0370847	205	264996	0.0773597	448	264996	0.169059	167	264996	0.0630198	89	264996	0.0335854	46	264996	0.0173588	270	264996	0.101888	78	264996	0.0294344	439	264996	0.165663	88	264996	0.033208	190	264996	0.0716992	9606	264996	3.62496	235	264996	0.0886806	259	264996	0.0977373	3585	264996	1.35285
Epidinium	0.317787	0.0597314	0.0457422	1.02337	2.2603	0.108094	0.0904697	222	264996	0.0837748	403	264996	0.152078	176	264996	0.0664161	63	264996	0.0237739	27	264996	0.0101888	169	264996	0.0637745	48	264996	0.0181135	503	264996	0.189814	59	264996	0.0222645	120	264996	0.0452837	19316	264996	7.28917	159	264996	0.0600009	105	264996	0.0396232	3955	264996	1.49248
Diploplastron	0.192977	0.0548795	0.0476363	0.512377	0.905265	0.0585334	0.0406996	201	264996	0.0758502	403	264996	0.152078	152	264996	0.0573594	23	264996	0.00867938	13	264996	0.00490573	174	264996	0.0656614	52	264996	0.0196229	88	264996	0.033208	27	264996	0.0101888	39	264996	0.0147172	5793	264996	2.18607	140	264996	0.052831	86	264996	0.0324533	5897	264996	2.22532
Trichostomatia_XX	0.231945	0.0513754	0.0388444	1.2435	2.46652	0.105117	0.0743596	93	264996	0.0350949	315	264996	0.11887	104	264996	0.0392459	65	264996	0.0245287	32	264996	0.0120757	274	264996	0.103398	70	264996	0.0264155	228	264996	0.086039	38	264996	0.0143398	127	264996	0.0479253	20432	264996	7.71031	253	264996	0.0954731	193	264996	0.0728313	8032	264996	3.03099
Opalina	0.802166	0.039785	0.00453671	0.0373171	0.0140291	0.0407553	0.0097305	101	264996	0.0381138	105	264996	0.0396232	100	264996	0.0377364	132	264996	0.0498121	98	264996	0.0369817	92	264996	0.0347175	110	264996	0.0415101	134	264996	0.0505668	87	264996	0.0328307	89	264996	0.0335854	5	264996	0.00188682	92	264996	0.0347175	115	264996	0.0433969	115	264996	0.0433969
Ardissonea	0.949222	0.037413	0.0126619	0.0371075	0.02562	0.0346756	0.0107052	51	264996	0.0192456	110	264996	0.0415101	118	264996	0.044529	125	264996	0.0471705	86	264996	0.0324533	56	264996	0.0211324	148	264996	0.0558499	272	264996	0.102643	94	264996	0.0354722	121	264996	0.0456611	11	264996	0.00415101	99	264996	0.0373591	80	264996	0.0301891	59	264996	0.0222645
Karotomorpha	0.919102	0.0363348	0.0152617	0.0382815	0.027301	0.0342982	0.0102058	51	264996	0.0192456	118	264996	0.044529	146	264996	0.0550952	94	264996	0.0354722	66	264996	0.024906	47	264996	0.0177361	152	264996	0.0573594	291	264996	0.109813	102	264996	0.0384911	94	264996	0.0354722	12	264996	0.00452837	102	264996	0.0384911	90	264996	0.0339628	64	264996	0.0241513
Isotricha	0.444549	0.0361191	0.0204063	0.970078	2.59924	0.100714	0.098542	83	264996	0.0313212	211	264996	0.0796238	67	264996	0.0252834	77	264996	0.029057	40	264996	0.0150946	59	264996	0.0222645	133	264996	0.0501894	134	264996	0.0505668	108	264996	0.0407553	25	264996	0.0094341	22051	264996	8.32126	76	264996	0.0286797	94	264996	0.0354722	353	264996	0.13321
Dasytricha	0.3319	0.0327768	0.0256627	0.439839	1.00082	0.0337531	0.0260203	114	264996	0.0430195	104	264996	0.0392459	74	264996	0.0279249	25	264996	0.0094341	6	264996	0.00226419	228	264996	0.086039	57	264996	0.0215098	165	264996	0.0622651	69	264996	0.0260381	129	264996	0.04868	8610	264996	3.24911	111	264996	0.0418874	32	264996	0.0120757	1142	264996	0.43095
Eremoplastron	0.149288	0.0240435	0.0231252	0.11497	0.167163	0.0224741	0.0150842	102	264996	0.0384911	191	264996	0.0720766	65	264996	0.0245287	10	264996	0.00377364	7	264996	0.00264155	57	264996	0.0215098	14	264996	0.0052831	100	264996	0.0377364	5	264996	0.00188682	20	264996	0.00754728	1311	264996	0.494724	35	264996	0.0132077	326	264996	0.123021	873	264996	0.329439
Ancistrum	0.679147	0.0210785	0.00552194	0.0248641	0.0118687	0.0241094	0.00500771	69	264996	0.0260381	64	264996	0.0241513	80	264996	0.0301891	35	264996	0.0132077	52	264996	0.0196229	48	264996	0.0181135	43	264996	0.0162267	69	264996	0.0260381	35	264996	0.0132077	33	264996	0.012453	15	264996	0.00566046	64	264996	0.0241513	105	264996	0.0396232	71	264996	0.0267929
Segregatospumella	0.742345	0.0202159	0.00485721	0.0218452	0.0124453	0.018407	0.00649675	39	264996	0.0147172	64	264996	0.0241513	67	264996	0.0252834	53	264996	0.0200003	38	264996	0.0143398	43	264996	0.0162267	71	264996	0.0267929	135	264996	0.0509442	46	264996	0.0173588	60	264996	0.0226419	7	264996	0.00264155	62	264996	0.0233966	63	264996	0.0237739	39	264996	0.0147172
Entodinium_1	0.389686	0.0173588	0.0137044	0.580889	1.4814	0.0345917	0.0369748	33	264996	0.012453	123	264996	0.0464158	23	264996	0.00867938	12	264996	0.00452837	14	264996	0.0052831	51	264996	0.0192456	66	264996	0.024906	275	264996	0.103775	96	264996	0.036227	26	264996	0.00981147	12633	264996	4.76724	169	264996	0.0637745	21	264996	0.00792465	559	264996	0.210947
Rhabdonema	0.940061	0.0163884	0.00511427	0.0152623	0.00766608	0.0155977	0.00470656	27	264996	0.0101888	60	264996	0.0226419	59	264996	0.0222645	41	264996	0.0154719	30	264996	0.0113209	31	264996	0.0116983	56	264996	0.0211324	73	264996	0.0275476	64	264996	0.0241513	61	264996	0.0230192	6	264996	0.00226419	38	264996	0.0143398	33	264996	0.012453	26	264996	0.00981147
Histiobalantium	0.829832	0.0146633	0.00234737	0.013082	0.00723691	0.0140883	0.00331852	48	264996	0.0181135	45	264996	0.0169814	41	264996	0.0154719	40	264996	0.0150946	30	264996	0.0113209	31	264996	0.0116983	37	264996	0.0139625	18	264996	0.00679256	30	264996	0.0113209	26	264996	0.00981147	2	264996	0.000754728	35	264996	0.0132077	72	264996	0.0271702	32	264996	0.0120757
Staurosira	0.934581	0.0135312	0.00267924	0.0127046	0.00518942	0.0127465	0.00515202	32	264996	0.0120757	35	264996	0.0132077	25	264996	0.0094341	45	264996	0.0169814	47	264996	0.0177361	34	264996	0.0128304	33	264996	0.012453	46	264996	0.0173588	27	264996	0.0101888	26	264996	0.00981147	5	264996	0.00188682	44	264996	0.016604	30	264996	0.0113209	33	264996	0.012453
Cyclotella	0.867344	0.0122913	0.00197487	0.0131658	0.00492808	0.0133335	0.00364134	33	264996	0.012453	41	264996	0.0154719	39	264996	0.0147172	31	264996	0.0116983	27	264996	0.0101888	26	264996	0.00981147	31	264996	0.0116983	51	264996	0.0192456	28	264996	0.0105662	35	264996	0.0132077	7	264996	0.00264155	25	264996	0.0094341	44	264996	0.016604	35	264996	0.0132077
Cymbella	0.874336	0.0122913	0.00402843	0.0126207	0.00898326	0.0140044	0.00567148	17	264996	0.00641519	36	264996	0.0135851	35	264996	0.0132077	40	264996	0.0150946	27	264996	0.0101888	22	264996	0.00830201	51	264996	0.0192456	95	264996	0.0358496	25	264996	0.0094341	29	264996	0.0109436	4	264996	0.00150946	39	264996	0.0147172	29	264996	0.0109436	20	264996	0.00754728
Pylaiella	0.123383	0.00905674	0.00212514	0.0163524	0.0100505	0.0103146	0.00560004	22	264996	0.00830201	22	264996	0.00830201	34	264996	0.0128304	23	264996	0.00867938	14	264996	0.0052831	26	264996	0.00981147	27	264996	0.0101888	77	264996	0.029057	17	264996	0.00641519	23	264996	0.00867938	17	264996	0.00641519	28	264996	0.0105662	42	264996	0.0158493	42	264996	0.0158493
Ophryoscolecidae_1_X	0.380458	0.00873329	0.00892649	0.325078	0.810447	0.0251995	0.0404712	14	264996	0.0052831	79	264996	0.0298118	15	264996	0.00566046	9	264996	0.00339628	5	264996	0.00188682	13	264996	0.00490573	27	264996	0.0101888	48	264996	0.0181135	56	264996	0.0211324	8	264996	0.00301891	6907	264996	2.60645	12	264996	0.00452837	25	264996	0.0094341	691	264996	0.260759
Parvilucifera	0.5543	0.00814028	0.00181379	0.00704413	0.00257789	0.00704413	0.00173387	18	264996	0.00679256	26	264996	0.00981147	25	264996	0.0094341	21	264996	0.00792465	16	264996	0.00603783	16	264996	0.00603783	29	264996	0.0109436	15	264996	0.00566046	23	264996	0.00867938	24	264996	0.00905674	4	264996	0.00150946	25	264996	0.0094341	22	264996	0.00830201	16	264996	0.00603783
Spirochona	0.354069	0.00770901	0.00191207	0.00821815	0.00362731	0.00620554	0.00242031	13	264996	0.00490573	23	264996	0.00867938	19	264996	0.00716992	24	264996	0.00905674	20	264996	0.00754728	15	264996	0.00566046	29	264996	0.0109436	26	264996	0.00981147	35	264996	0.0132077	13	264996	0.00490573	5	264996	0.00188682	37	264996	0.0139625	15	264996	0.00566046	21	264996	0.00792465
Metadinium	0.174819	0.0076551	0.00626182	0.100253	0.181132	0.00536696	0.00301775	17	264996	0.00641519	34	264996	0.0128304	53	264996	0.0200003	4	264996	0.00150946	4	264996	0.00150946	9	264996	0.00339628	21	264996	0.00792465	15	264996	0.00566046	14	264996	0.0052831	8	264996	0.00301891	1512	264996	0.570575	14	264996	0.0052831	172	264996	0.0649066	626	264996	0.23623
Homoeostrichus	0.58792	0.00743947	0.00280016	0.00750535	0.0048991	0.00578625	0.00262653	16	264996	0.00603783	23	264996	0.00867938	35	264996	0.0132077	22	264996	0.00830201	16	264996	0.00603783	10	264996	0.00377364	16	264996	0.00603783	38	264996	0.0143398	34	264996	0.0128304	35	264996	0.0132077	2	264996	0.000754728	21	264996	0.00792465	14	264996	0.0052831	1	264996	0.000377364
Pauliella	0.51914	0.00738556	0.00381043	0.0109016	0.0083238	0.00863745	0.00360397	17	264996	0.00641519	21	264996	0.00792465	10	264996	0.00377364	39	264996	0.0147172	8	264996	0.00301891	14	264996	0.0052831	28	264996	0.0105662	77	264996	0.029057	31	264996	0.0116983	57	264996	0.0215098	8	264996	0.00301891	25	264996	0.0094341	12	264996	0.00452837	10	264996	0.00377364
Ceratanaulus	0.608303	0.00641519	0.00218182	0.00796658	0.00577378	0.00603783	0.00271539	9	264996	0.00339628	20	264996	0.00754728	19	264996	0.00716992	15	264996	0.00566046	10	264996	0.00377364	19	264996	0.00716992	27	264996	0.0101888	58	264996	0.0218871	16	264996	0.00603783	26	264996	0.00981147	3	264996	0.00113209	28	264996	0.0105662	22	264996	0.00830201	14	264996	0.0052831
Pseudosolenia	0.861204	0.00619955	0.00108356	0.0062894	0.00429157	0.00696027	0.0021281	17	264996	0.00641519	18	264996	0.00679256	10	264996	0.00377364	18	264996	0.00679256	19	264996	0.00716992	18	264996	0.00679256	15	264996	0.00566046	40	264996	0.0150946	13	264996	0.00490573	25	264996	0.0094341	2	264996	0.000754728	24	264996	0.00905674	19	264996	0.00716992	8	264996	0.00301891
Achnanthidium	0.864668	0.00598392	0.00273187	0.00758921	0.00906625	0.00637326	0.00306801	12	264996	0.00452837	22	264996	0.00830201	27	264996	0.0101888	21	264996	0.00792465	12	264996	0.00452837	4	264996	0.00150946	13	264996	0.00490573	87	264996	0.0328307	11	264996	0.00415101	18	264996	0.00679256	3	264996	0.00113209	10	264996	0.00377364	12	264996	0.00452837	10	264996	0.00377364
Ellerbeckia	0.717377	0.00555264	0.00208371	0.00578625	0.00272121	0.00666677	0.00318718	15	264996	0.00566046	18	264996	0.00679256	7	264996	0.00264155	9	264996	0.00339628	23	264996	0.00867938	20	264996	0.00754728	11	264996	0.00415101	24	264996	0.00905674	22	264996	0.00830201	9	264996	0.00339628	3	264996	0.00113209	23	264996	0.00867938	12	264996	0.00452837	14	264996	0.0052831
Urostomides	0.101921	0.00549874	0.00128932	0.00972761	0.00661501	0.0052831	0.00274437	15	264996	0.00566046	12	264996	0.00452837	19	264996	0.00716992	14	264996	0.0052831	11	264996	0.00415101	20	264996	0.00754728	11	264996	0.00415101	20	264996	0.00754728	13	264996	0.00490573	22	264996	0.00830201	5	264996	0.00188682	20	264996	0.00754728	39	264996	0.0147172	25	264996	0.0094341
Atkinsiella	0.243555	0.00533701	0.00221356	0.00851166	0.00384883	0.00712799	0.00368215	8	264996	0.00301891	23	264996	0.00867938	13	264996	0.00490573	10	264996	0.00377364	13	264996	0.00490573	9	264996	0.00339628	23	264996	0.00867938	36	264996	0.0135851	31	264996	0.0116983	26	264996	0.00981147	2	264996	0.000754728	20	264996	0.00754728	34	264996	0.0128304	18	264996	0.00679256
Colpoda	0.226193	0.00512137	0.00851935	0.0191198	0.0374075	0.0496444	0.071262	0	264996	0	68	264996	0.0256608	4	264996	0.00150946	0	264996	0	8	264996	0.00301891	3	264996	0.00113209	12	264996	0.00452837	0	264996	0	51	264996	0.0192456	0	264996	0	0	264996	0	60	264996	0.0226419	324	264996	0.122266	2	264996	0.000754728
Podosira	0.952108	0.00512137	0.00205563	0.00477995	0.00281271	0.00482188	0.00136383	15	264996	0.00566046	7	264996	0.00264155	10	264996	0.00377364	19	264996	0.00716992	13	264996	0.00490573	23	264996	0.00867938	8	264996	0.00301891	2	264996	0.000754728	4	264996	0.00150946	15	264996	0.00566046	2	264996	0.000754728	15	264996	0.00566046	22	264996	0.00830201	20	264996	0.00754728
Paralia	0.965053	0.0046901	0.00196454	0.00519924	0.00547656	0.00477995	0.00310674	14	264996	0.0052831	15	264996	0.00566046	14	264996	0.0052831	9	264996	0.00339628	13	264996	0.00490573	2	264996	0.000754728	20	264996	0.00754728	53	264996	0.0200003	10	264996	0.00377364	17	264996	0.00641519	0	264996	0	11	264996	0.00415101	11	264996	0.00415101	8	264996	0.00301891
Chrysastrella	0.362014	0.00425882	0.00182337	0.00549275	0.00365916	0.0062894	0.00164969	4	264996	0.00150946	6	264996	0.00226419	11	264996	0.00415101	19	264996	0.00716992	10	264996	0.00377364	15	264996	0.00566046	14	264996	0.0052831	36	264996	0.0135851	20	264996	0.00754728	22	264996	0.00830201	2	264996	0.000754728	8	264996	0.00301891	12	264996	0.00452837	10	264996	0.00377364
Ostracodinium	0.209388	0.00425882	0.00416184	0.0723701	0.127918	0.0149688	0.0101927	11	264996	0.00415101	26	264996	0.00981147	30	264996	0.0113209	2	264996	0.000754728	1	264996	0.000377364	4	264996	0.00150946	5	264996	0.00188682	21	264996	0.00792465	3	264996	0.00113209	15	264996	0.00566046	612	264996	0.230947	34	264996	0.0128304	18	264996	0.00679256	994	264996	0.3751
Pinnularia	0.81282	0.0040971	0.00294682	0.00410908	0.00521511	0.00264155	0.0061649	11	264996	0.00415101	8	264996	0.00301891	13	264996	0.00490573	12	264996	0.00452837	27	264996	0.0101888	0	264996	0	5	264996	0.00188682	0	264996	0	32	264996	0.0120757	4	264996	0.00150946	0	264996	0	10	264996	0.00377364	39	264996	0.0147172	11	264996	0.00415101
Aulacoseira	0.397366	0.00361191	0.00158643	0.00280927	0.00209814	0.00389943	0.00092435	3	264996	0.00113209	17	264996	0.00641519	9	264996	0.00339628	12	264996	0.00452837	7	264996	0.00264155	7	264996	0.00264155	12	264996	0.00452837	19	264996	0.00716992	7	264996	0.00264155	3	264996	0.00113209	0	264996	0	10	264996	0.00377364	10	264996	0.00377364	11	264996	0.00415101
Nitzschia	0.781351	0.00345019	0.00144653	0.00289313	0.00191595	0.00348014	0.00200298	5	264996	0.00188682	11	264996	0.00415101	13	264996	0.00490573	13	264996	0.00490573	10	264996	0.00377364	2	264996	0.000754728	10	264996	0.00377364	16	264996	0.00603783	8	264996	0.00301891	13	264996	0.00490573	1	264996	0.000377364	4	264996	0.00150946	6	264996	0.00226419	7	264996	0.00264155
Pleuronema	0.349823	0.00323455	0.0016859	0.00507345	0.00369359	0.00524117	0.00222502	5	264996	0.00188682	5	264996	0.00188682	18	264996	0.00679256	8	264996	0.00301891	6	264996	0.00226419	6	264996	0.00226419	12	264996	0.00452837	30	264996	0.0113209	13	264996	0.00490573	21	264996	0.00792465	0	264996	0	2	264996	0.000754728	9	264996	0.00339628	7	264996	0.00264155
Ophryoscolex	0.231515	0.00318064	0.0028012	0.0251576	0.04674	0.00297698	0.00222502	24	264996	0.00905674	14	264996	0.0052831	3	264996	0.00113209	5	264996	0.00188682	2	264996	0.000754728	8	264996	0.00301891	3	264996	0.00113209	12	264996	0.00452837	0	264996	0	5	264996	0.00188682	384	264996	0.144908	8	264996	0.00301891	4	264996	0.00150946	174	264996	0.0656614
Campylodiscus	0.887382	0.002965	0.00216712	0.00322856	0.00252274	0.00268348	0.00189472	4	264996	0.00150946	15	264996	0.00566046	7	264996	0.00264155	3	264996	0.00113209	18	264996	0.00679256	6	264996	0.00226419	2	264996	0.000754728	2	264996	0.000754728	6	264996	0.00226419	20	264996	0.00754728	0	264996	0	7	264996	0.00264155	14	264996	0.0052831	6	264996	0.00226419
Ectocarpus	0.36971	0.002965	0.00154184	0.00486381	0.003109	0.00444451	0.00250806	4	264996	0.00150946	3	264996	0.00113209	5	264996	0.00188682	9	264996	0.00339628	7	264996	0.00264155	12	264996	0.00452837	15	264996	0.00566046	32	264996	0.0120757	17	264996	0.00641519	11	264996	0.00415101	1	264996	0.000377364	14	264996	0.0052831	7	264996	0.00264155	7	264996	0.00264155
Olpidophydiales_X	0.864085	0.00280328	0.00106462	0.00335435	0.00307831	0.00293505	0.00104907	9	264996	0.00339628	5	264996	0.00188682	9	264996	0.00339628	5	264996	0.00188682	3	264996	0.00113209	11	264996	0.00415101	10	264996	0.00377364	28	264996	0.0105662	6	264996	0.00226419	10	264996	0.00377364	0	264996	0	4	264996	0.00150946	3	264996	0.00113209	16	264996	0.00603783
Chaetoceros	0.587253	0.00269546	0.00159374	0.00339628	0.00331852	0.00415101	0.00242611	6	264996	0.00226419	8	264996	0.00301891	5	264996	0.00188682	14	264996	0.0052831	4	264996	0.00150946	1	264996	0.000377364	12	264996	0.00452837	31	264996	0.0116983	3	264996	0.00113209	13	264996	0.00490573	0	264996	0	13	264996	0.00490573	6	264996	0.00226419	3	264996	0.00113209
Tilopteris	0.444964	0.00258764	0.000766193	0.0102308	0.0207938	0.00339628	0.0019487	5	264996	0.00188682	7	264996	0.00264155	7	264996	0.00264155	4	264996	0.00150946	11	264996	0.00415101	7	264996	0.00264155	7	264996	0.00264155	182	264996	0.0686803	12	264996	0.00452837	8	264996	0.00301891	0	264996	0	8	264996	0.00301891	6	264996	0.00226419	1	264996	0.000377364
Protocruzia	0.0633845	0.00253373	0.00106189	0.00113209	0.000907071	0.00188682	0.00116651	9	264996	0.00339628	4	264996	0.00150946	6	264996	0.00226419	7	264996	0.00264155	2	264996	0.000754728	11	264996	0.00415101	8	264996	0.00301891	2	264996	0.000754728	3	264996	0.00113209	2	264996	0.000754728	0	264996	0	1	264996	0.000377364	1	264996	0.000377364	5	264996	0.00188682
Nyctotheroides	0.0886928	0.002372	0.00108088	0.00469609	0.00272766	0.0045703	0.00181801	8	264996	0.00301891	8	264996	0.00301891	10	264996	0.00377364	1	264996	0.000377364	5	264996	0.00188682	8	264996	0.00301891	4	264996	0.00150946	13	264996	0.00490573	4	264996	0.00150946	7	264996	0.00264155	5	264996	0.00188682	14	264996	0.0052831	12	264996	0.00452837	18	264996	0.00679256
Diadesmis	0.775435	0.00231809	0.000619369	0.00201261	0.00191595	0.00259962	0.00184394	6	264996	0.00226419	5	264996	0.00188682	8	264996	0.00301891	8	264996	0.00301891	6	264996	0.00226419	3	264996	0.00113209	7	264996	0.00264155	19	264996	0.00716992	4	264996	0.00150946	2	264996	0.000754728	1	264996	0.000377364	5	264996	0.00188682	6	264996	0.00226419	4	264996	0.00150946
Isotrichidae_2_X	0.390714	0.00215637	0.00172003	0.0442774	0.105092	0.00725378	0.0117257	10	264996	0.00377364	10	264996	0.00377364	7	264996	0.00264155	2	264996	0.000754728	0	264996	0	11	264996	0.00415101	0	264996	0	4	264996	0.00150946	3	264996	0.00113209	6	264996	0.00226419	902	264996	0.340382	46	264996	0.0173588	2	264996	0.000754728	77	264996	0.029057
Paraisotricha	0.177977	0.00215637	0.00137864	0.00507345	0.00553499	0.00205454	0.00111251	12	264996	0.00452837	2	264996	0.000754728	6	264996	0.00226419	2	264996	0.000754728	2	264996	0.000754728	9	264996	0.00339628	7	264996	0.00264155	9	264996	0.00339628	1	264996	0.000377364	7	264996	0.00264155	54	264996	0.0203777	12	264996	0.00452837	10	264996	0.00377364	12	264996	0.00452837
Diplodinium	0.02342	0.00210246	0.00242771	0.020755	0.0236803	0.00150946	0.00148834	15	264996	0.00566046	3	264996	0.00113209	4	264996	0.00150946	1	264996	0.000377364	0	264996	0	16	264996	0.00603783	0	264996	0	192	264996	0.0724539	68	264996	0.0256608	1	264996	0.000377364	81	264996	0.0305665	1	264996	0.000377364	34	264996	0.0128304	116	264996	0.0437742
Mischococcus	0.969066	0.00210246	0.00108356	0.00209647	0.00142436	0.00197068	0.000867441	6	264996	0.00226419	11	264996	0.00415101	6	264996	0.00226419	4	264996	0.00150946	7	264996	0.00264155	1	264996	0.000377364	4	264996	0.00150946	0	264996	0	7	264996	0.00264155	3	264996	0.00113209	2	264996	0.000754728	6	264996	0.00226419	9	264996	0.00339628	3	264996	0.00113209
Haplospora	0.164539	0.00199464	0.000848962	0.00113209	0.00097435	0.00159332	0.000584008	4	264996	0.00150946	7	264996	0.00264155	8	264996	0.00301891	8	264996	0.00301891	5	264996	0.00188682	3	264996	0.00113209	2	264996	0.000754728	2	264996	0.000754728	6	264996	0.00226419	8	264996	0.00301891	0	264996	0	5	264996	0.00188682	2	264996	0.000754728	2	264996	0.000754728
Aulacodiscus	0.645152	0.00194073	0.00160646	0.00276734	0.00202046	0.00251576	0.00120652	10	264996	0.00377364	1	264996	0.000377364	7	264996	0.00264155	4	264996	0.00150946	1	264996	0.000377364	12	264996	0.00452837	1	264996	0.000377364	6	264996	0.00226419	4	264996	0.00150946	2	264996	0.000754728	2	264996	0.000754728	6	264996	0.00226419	18	264996	0.00679256	3	264996	0.00113209
Psammoneis	0.192774	0.00194073	0.00107548	0.00238997	0.00120652	0.00138367	0.000889456	5	264996	0.00188682	3	264996	0.00113209	11	264996	0.00415101	6	264996	0.00226419	5	264996	0.00188682	5	264996	0.00188682	1	264996	0.000377364	12	264996	0.00452837	3	264996	0.00113209	2	264996	0.000754728	7	264996	0.00264155	7	264996	0.00264155	11	264996	0.00415101	4	264996	0.00150946
Allegra	0.169447	0.00188682	0.00125968	0.00188682	0.00102191	0.00301891	0.00155082	4	264996	0.00150946	6	264996	0.00226419	10	264996	0.00377364	0	264996	0	6	264996	0.00226419	1	264996	0.000377364	8	264996	0.00301891	6	264996	0.00226419	6	264996	0.00226419	9	264996	0.00339628	3	264996	0.00113209	5	264996	0.00188682	0	264996	0	8	264996	0.00301891
Phaeosiphoniella	0.972512	0.00188682	0.00135311	0.00197068	0.00244416	0.00176103	0.00116651	1	264996	0.000377364	1	264996	0.000377364	11	264996	0.00415101	5	264996	0.00188682	2	264996	0.000754728	8	264996	0.00301891	7	264996	0.00264155	23	264996	0.00867938	2	264996	0.000754728	4	264996	0.00150946	0	264996	0	3	264996	0.00113209	2	264996	0.000754728	4	264996	0.00150946
Placoneis	0.729428	0.00188682	0.00110481	0.00197068	0.00259488	0.00129981	0.00112664	2	264996	0.000754728	7	264996	0.00264155	10	264996	0.00377364	6	264996	0.00226419	3	264996	0.00113209	1	264996	0.000377364	6	264996	0.00226419	24	264996	0.00905674	1	264996	0.000377364	2	264996	0.000754728	0	264996	0	6	264996	0.00226419	3	264996	0.00113209	2	264996	0.000754728
Adriamonas	0.627181	0.00167118	0.0005282	0.00188682	0.0012704	0.00138367	0.00105242	6	264996	0.00226419	4	264996	0.00150946	2	264996	0.000754728	5	264996	0.00188682	5	264996	0.00188682	6	264996	0.00226419	3	264996	0.00113209	11	264996	0.00415101	7	264996	0.00264155	1	264996	0.000377364	0	264996	0	3	264996	0.00113209	8	264996	0.00301891	7	264996	0.00264155
Loxophyllum	0.37256	0.00161728	0.000560241	0.00134174	0.0011948	0.000922446	0.000817354	3	264996	0.00113209	5	264996	0.00188682	7	264996	0.00264155	5	264996	0.00188682	2	264996	0.000754728	4	264996	0.00150946	4	264996	0.00150946	1	264996	0.000377364	2	264996	0.000754728	0	264996	0	1	264996	0.000377364	2	264996	0.000754728	10	264996	0.00377364	7	264996	0.00264155
Hyalodiscus	0.794021	0.00145555	0.00155498	0.000964375	0.00164115	0.00109016	0.000804344	2	264996	0.000754728	2	264996	0.000754728	13	264996	0.00490573	3	264996	0.00113209	0	264996	0	1	264996	0.000377364	6	264996	0.00226419	14	264996	0.0052831	2	264996	0.000754728	0	264996	0	0	264996	0	0	264996	0	5	264996	0.00188682	2	264996	0.000754728
Placidia	0.882837	0.00145555	0.00109424	0.00159332	0.00214045	0.00188682	0.00149894	2	264996	0.000754728	5	264996	0.00188682	2	264996	0.000754728	5	264996	0.00188682	1	264996	0.000377364	2	264996	0.000754728	10	264996	0.00377364	20	264996	0.00754728	2	264996	0.000754728	4	264996	0.00150946	1	264996	0.000377364	2	264996	0.000754728	4	264996	0.00150946	2	264996	0.000754728
Pterospora	0.384836	0.00123991	0.00102285	0.000587011	0.000592971	0.000796658	0.000965286	5	264996	0.00188682	0	264996	0	7	264996	0.00264155	1	264996	0.000377364	4	264996	0.00150946	6	264996	0.00226419	0	264996	0	4	264996	0.00150946	0	264996	0	3	264996	0.00113209	0	264996	0	1	264996	0.000377364	0	264996	0	3	264996	0.00113209
Licmophora	0.311125	0.00113209	0.000605129	0.00201261	0.00217871	0.000964375	0.000714031	2	264996	0.000754728	1	264996	0.000377364	5	264996	0.00188682	4	264996	0.00150946	1	264996	0.000377364	5	264996	0.00188682	3	264996	0.00113209	20	264996	0.00754728	6	264996	0.00226419	8	264996	0.00301891	1	264996	0.000377364	3	264996	0.00113209	6	264996	0.00226419	3	264996	0.00113209
Sarcinochrysidaceae_X	0.63517	0.00107818	0.000955273	0.00109016	0.00147171	0.00062894	0.000533674	1	264996	0.000377364	4	264996	0.00150946	2	264996	0.000754728	8	264996	0.00301891	1	264996	0.000377364	0	264996	0	4	264996	0.00150946	12	264996	0.00452837	0	264996	0	1	264996	0.000377364	0	264996	0	7	264996	0.00264155	3	264996	0.00113209	0	264996	0
Limnofila	0.755223	0.00102427	0.00066025	0.00134174	0.00105409	0.00104823	0.000920538	3	264996	0.00113209	5	264996	0.00188682	2	264996	0.000754728	0	264996	0	5	264996	0.00188682	3	264996	0.00113209	1	264996	0.000377364	7	264996	0.00264155	6	264996	0.00226419	0	264996	0	0	264996	0	4	264996	0.00150946	3	264996	0.00113209	8	264996	0.00301891
Rhizosolenia	0.257368	0.000970365	0.000694571	0.000419294	0.000823781	0.000461223	0.000388837	0	264996	0	3	264996	0.00113209	1	264996	0.000377364	5	264996	0.00188682	1	264996	0.000377364	3	264996	0.00113209	5	264996	0.00188682	0	264996	0	2	264996	0.000754728	0	264996	0	0	264996	0	7	264996	0.00264155	1	264996	0.000377364	0	264996	0
Sinophysis	0.26523	0.000970365	0.000444546	0.000712799	0.000763989	0.000461223	0.000388837	1	264996	0.000377364	2	264996	0.000754728	3	264996	0.00113209	4	264996	0.00150946	1	264996	0.000377364	3	264996	0.00113209	4	264996	0.00150946	1	264996	0.000377364	5	264996	0.00188682	6	264996	0.00226419	0	264996	0	0	264996	0	1	264996	0.000377364	1	264996	0.000377364
Pseudocyclidium	0.281476	0.000916456	0.000852379	0.000419294	0.000330152	0.000461223	0.000610501	6	264996	0.00226419	0	264996	0	4	264996	0.00150946	4	264996	0.00150946	3	264996	0.00113209	0	264996	0	0	264996	0	1	264996	0.000377364	2	264996	0.000754728	0	264996	0	0	264996	0	2	264996	0.000754728	0	264996	0	2	264996	0.000754728
Pseudoplatynematum	0.553527	0.000916456	0.000943025	0.000964375	0.000644131	0.000587011	0.000619079	3	264996	0.00113209	1	264996	0.000377364	7	264996	0.00264155	1	264996	0.000377364	0	264996	0	5	264996	0.00188682	0	264996	0	3	264996	0.00113209	4	264996	0.00150946	2	264996	0.000754728	5	264996	0.00188682	2	264996	0.000754728	0	264996	0	1	264996	0.000377364
Dictyocha	0.820849	0.000808638	0.000469969	0.000922446	0.000855194	0.00104823	0.000706606	2	264996	0.000754728	2	264996	0.000754728	1	264996	0.000377364	2	264996	0.000754728	1	264996	0.000377364	2	264996	0.000754728	5	264996	0.00188682	5	264996	0.00188682	2	264996	0.000754728	6	264996	0.00226419	0	264996	0	1	264996	0.000377364	5	264996	0.00188682	0	264996	0
Pseudostaurastrum	0.409873	0.000808638	0.000711111	0.000335435	0.000330152	0.000838587	0.00114981	1	264996	0.000377364	3	264996	0.00113209	1	264996	0.000377364	0	264996	0	1	264996	0.000377364	6	264996	0.00226419	3	264996	0.00113209	0	264996	0	0	264996	0	2	264996	0.000754728	0	264996	0	1	264996	0.000377364	2	264996	0.000754728	1	264996	0.000377364
Eudiplodinium	0.552576	0.000754728	0.000988171	0.00180296	0.00304385	0.000964375	0.000565658	0	264996	0	2	264996	0.000754728	2	264996	0.000754728	2	264996	0.000754728	0	264996	0	8	264996	0.00301891	0	264996	0	0	264996	0	0	264996	0	1	264996	0.000377364	23	264996	0.00867938	0	264996	0	2	264996	0.000754728	16	264996	0.00603783
Diploneis	0.588146	0.000700819	0.000549768	0.000545082	0.000619079	0.000377364	0.000562541	1	264996	0.000377364	3	264996	0.00113209	4	264996	0.00150946	3	264996	0.00113209	0	264996	0	2	264996	0.000754728	0	264996	0	5	264996	0.00188682	2	264996	0.000754728	0	264996	0	0	264996	0	0	264996	0	3	264996	0.00113209	0	264996	0
Buxtonella	0.658371	0.00064691	0.00128706	0.000251576	0.000308117	0.000461223	0.00063589	10	264996	0.00377364	0	264996	0	0	264996	0	0	264996	0	1	264996	0.000377364	1	264996	0.000377364	0	264996	0	0	264996	0	0	264996	0	0	264996	0	2	264996	0.000754728	0	264996	0	0	264996	0	1	264996	0.000377364
Symbiodinium	0.431165	0.00064691	0.000773742	0.000293505	0.000345758	0.000419294	0.000330152	0	264996	0	2	264996	0.000754728	1	264996	0.000377364	6	264996	0.00226419	0	264996	0	3	264996	0.00113209	0	264996	0	2	264996	0.000754728	2	264996	0.000754728	0	264996	0	0	264996	0	0	264996	0	0	264996	0	1	264996	0.000377364
Biddulphia	0.697779	0.000593001	0.000633289	0.000880516	0.000853136	0.0010063	0.00112508	0	264996	0	4	264996	0.00150946	4	264996	0.00150946	1	264996	0.000377364	0	264996	0	0	264996	0	2	264996	0.000754728	5	264996	0.00188682	5	264996	0.00188682	2	264996	0.000754728	0	264996	0	4	264996	0.00150946	0	264996	0	0	264996	0
Allas	0.714784	0.000539092	0.000750868	0.000209647	0.000402172	0.000503152	0.00118	0	264996	0	1	264996	0.000377364	0	264996	0	4	264996	0.00150946	5	264996	0.00188682	0	264996	0	0	264996	0	0	264996	0	2	264996	0.000754728	0	264996	0	3	264996	0.00113209	0	264996	0	0	264996	0	0	264996	0
Disematostoma	0.889565	0.000539092	0.000664637	0.000461223	0.000427597	0.000587011	0.000474376	1	264996	0.000377364	0	264996	0	5	264996	0.00188682	0	264996	0	1	264996	0.000377364	0	264996	0	3	264996	0.00113209	1	264996	0.000377364	1	264996	0.000377364	2	264996	0.000754728	0	264996	0	3	264996	0.00113209	0	264996	0	0	264996	0
Eunotia	0.881204	0.000539092	0.000750868	0.000712799	0.00074299	0.000587011	0.000536958	1	264996	0.000377364	1	264996	0.000377364	2	264996	0.000754728	0	264996	0	0	264996	0	6	264996	0.00226419	0	264996	0	7	264996	0.00264155	2	264996	0.000754728	2	264996	0.000754728	0	264996	0	1	264996	0.000377364	1	264996	0.000377364	2	264996	0.000754728
Euplotes	0.149352	0.000485183	0.00118845	4.19294e-05	0.000118594	0.00662484	0.0117383	9	264996	0.00339628	0	264996	0	0	264996	0	0	264996	0	0	264996	0	0	264996	0	0	264996	0	0	264996	0	1	264996	0.000377364	0	264996	0	0	264996	0	0	264996	0	0	264996	0	0	264996	0
Navicula	0.794266	0.000485183	0.000628684	0.000587011	0.000714031	0.000377364	0.000470656	2	264996	0.000754728	0	264996	0	1	264996	0.000377364	1	264996	0.000377364	0	264996	0	0	264996	0	5	264996	0.00188682	6	264996	0.00226419	1	264996	0.000377364	2	264996	0.000754728	0	264996	0	2	264996	0.000754728	3	264996	0.00113209	0	264996	0
Stokesia	0.8863	0.000485183	0.000388745	0.000503152	0.000470656	0.000587011	0.000402172	2	264996	0.000754728	1	264996	0.000377364	0	264996	0	1	264996	0.000377364	2	264996	0.000754728	3	264996	0.00113209	0	264996	0	0	264996	0	0	264996	0	2	264996	0.000754728	0	264996	0	1	264996	0.000377364	4	264996	0.00150946	2	264996	0.000754728
Cyclospora	0.427062	0.000431273	0.000681903	0.00134174	0.00316282	8.38587e-05	0.000156885	0	264996	0	4	264996	0.00150946	4	264996	0.00150946	0	264996	0	0	264996	0	0	264996	0	0	264996	0	0	264996	0	0	264996	0	4	264996	0.00150946	0	264996	0	0	264996	0	27	264996	0.0101888	1	264996	0.000377364
Trichodina	0.0518108	0.000431273	0.000651387	0.00117402	0.000652268	0.00062894	0.000355782	0	264996	0	0	264996	0	0	264996	0	2	264996	0.000754728	0	264996	0	5	264996	0.00188682	1	264996	0.000377364	4	264996	0.00150946	4	264996	0.00150946	3	264996	0.00113209	1	264996	0.000377364	3	264996	0.00113209	7	264996	0.00264155	1	264996	0.000377364
Vorticellides	0.39707	0.000431273	0.0010564	0.000503152	0.0010063	0.0357657	0.0953918	0	264996	0	0	264996	0	0	264996	0	0	264996	0	0	264996	0	0	264996	0	8	264996	0.00301891	0	264996	0	8	264996	0.00301891	0	264996	0	0	264996	0	0	264996	0	4	264996	0.00150946	0	264996	0
Pedinella	0.566117	0.000377364	0.000285261	0.000293505	0.000496115	0.000167717	0.00025847	1	264996	0.000377364	1	264996	0.000377364	0	264996	0	1	264996	0.000377364	2	264996	0.000754728	0	264996	0	2	264996	0.000754728	4	264996	0.00150946	0	264996	0	0	264996	0	0	264996	0	0	264996	0	2	264996	0.000754728	0	264996	0
Thalassomyces	0.831339	0.000377364	0.000403419	0.000461223	0.000463125	0.000335435	0.000375028	3	264996	0.00113209	0	264996	0	1	264996	0.000377364	1	264996	0.000377364	2	264996	0.000754728	0	264996	0	0	264996	0	2	264996	0.000754728	0	264996	0	0	264996	0	0	264996	0	1	264996	0.000377364	4	264996	0.00150946	1	264996	0.000377364
Exocolpoda	0.499756	0.000323455	0.000511427	0.00188682	0.00533674	8.38587e-05	0.000237188	1	264996	0.000377364	4	264996	0.00150946	0	264996	0	0	264996	0	1	264996	0.000377364	0	264996	0	0	264996	0	0	264996	0	0	264996	0	0	264996	0	0	264996	0	0	264996	0	45	264996	0.0169814	0	264996	0
Actinoptychus	0.839651	0.000269546	0.00066025	0.000461223	0.000728654	0.000335435	0.000451593	0	264996	0	0	264996	0	0	264996	0	0	264996	0	5	264996	0.00188682	0	264996	0	0	264996	0	6	264996	0.00226419	0	264996	0	0	264996	0	0	264996	0	3	264996	0.00113209	1	264996	0.000377364	0	264996	0
Eustigmatos	0.521067	0.000269546	0.000388745	0.00062894	0.000665608	0.000419294	0.000627541	1	264996	0.000377364	0	264996	0	1	264996	0.000377364	0	264996	0	0	264996	0	3	264996	0.00113209	0	264996	0	0	264996	0	0	264996	0	0	264996	0	2	264996	0.000754728	0	264996	0	4	264996	0.00150946	2	264996	0.000754728
Fuscheria	0.173971	0.000269546	0.000388745	0.000838587	0.000920538	0.000293505	0.000427597	1	264996	0.000377364	1	264996	0.000377364	3	264996	0.00113209	0	264996	0	0	264996	0	0	264996	0	0	264996	0	1	264996	0.000377364	0	264996	0	2	264996	0.000754728	8	264996	0.00301891	0	264996	0	0	264996	0	4	264996	0.00150946
Hantzschia	0.460681	0.000269546	0.000170476	0.00062894	0.000533674	0.000461223	0.000683847	0	264996	0	1	264996	0.000377364	0	264996	0	1	264996	0.000377364	1	264996	0.000377364	1	264996	0.000377364	1	264996	0.000377364	3	264996	0.00113209	2	264996	0.000754728	0	264996	0	0	264996	0	0	264996	0	3	264996	0.00113209	4	264996	0.00150946
Stictocyclus	0.206448	0.000269546	0.000170476	0.000880516	0.000871485	0.000461223	0.000610501	1	264996	0.000377364	1	264996	0.000377364	1	264996	0.000377364	0	264996	0	1	264996	0.000377364	1	264996	0.000377364	0	264996	0	0	264996	0	0	264996	0	1	264996	0.000377364	0	264996	0	5	264996	0.00188682	2	264996	0.000754728	3	264996	0.00113209
Colpodida_X	0.671701	0.000215637	0.00039615	0.00104823	0.00270826	0.000545082	0.00105409	0	264996	0	3	264996	0.00113209	0	264996	0	0	264996	0	0	264996	0	0	264996	0	1	264996	0.000377364	0	264996	0	0	264996	0	0	264996	0	0	264996	0	0	264996	0	2	264996	0.000754728	0	264996	0
Gassovskiella	0.39191	0.000215637	0.0005282	0.00209647	0.00516225	0.000125788	0.000177891	4	264996	0.00150946	0	264996	0	0	264996	0	0	264996	0	0	264996	0	0	264996	0	0	264996	0	0	264996	0	0	264996	0	0	264996	0	44	264996	0.016604	5	264996	0.00188682	0	264996	0	1	264996	0.000377364
Thraustochytrium	0.373935	0.000161728	0.000274884	0.000587011	0.00092625	0.00062894	0.000533674	0	264996	0	0	264996	0	1	264996	0.000377364	0	264996	0	2	264996	0.000754728	0	264996	0	0	264996	0	8	264996	0.00301891	0	264996	0	0	264996	0	0	264996	0	1	264996	0.000377364	1	264996	0.000377364	3	264996	0.00113209
Archiscenium	0.270269	5.39092e-05	0.00013205	0.000125788	0.000251576	0.000335435	0.000485367	0	264996	0	0	264996	0	0	264996	0	0	264996	0	0	264996	0	0	264996	0	1	264996	0.000377364	1	264996	0.000377364	2	264996	0.000754728	0	264996	0	0	264996	0	0	264996	0	0	264996	0	0	264996	0
Pseudoentodinium	0.464175	5.39092e-05	0.00013205	0.0024319	0.00674607	0.000251576	0.000470656	0	264996	0	0	264996	0	0	264996	0	1	264996	0.000377364	0	264996	0	0	264996	0	0	264996	0	0	264996	0	0	264996	0	0	264996	0	57	264996	0.0215098	0	264996	0	1	264996	0.000377364	0	264996	0
Bresslauides	0.639489	0	0	0.000251576	0.000711565	0.000251576	0.000589998	0	264996	0	0	264996	0	0	264996	0	0	264996	0	0	264996	0	0	264996	0	0	264996	0	0	264996	0	0	264996	0	0	264996	0	0	264996	0	0	264996	0	0	264996	0	0	264996	0
Vorticella	0.278045	0	0	0.000125788	0.000251576	0.00888902	0.0200821	0	264996	0	0	264996	0	0	264996	0	0	264996	0	0	264996	0	0	264996	0	0	264996	0	0	264996	0	1	264996	0.000377364	0	264996	0	0	264996	0	0	264996	0	2	264996	0.000754728	0	264996	0
[truncated: 33 more columns]

## Sheet: 5F
Supplementry Table 5F : Groupwise mean relative abundance (%) of ciliate genera present at above one percent mean relative frequency in fecal samples.
Genus	p-values	MS: mean rel. freq. (%)	MS: std. dev. (%)	20%MLM: mean rel. freq. (%)	20%MLM: std. dev. (%)	30%MLM: mean rel. freq. (%)	30%MLM: std. dev. (%)
Blastocystis	0.27	97.99	0.78	85.86	26.49	97.33	0.95
Polyplastron	0.26	0.27	0.24	4	8.05	0.4	0.25
Entodinium	0.4	0.07	0.06	1.73	4.39	0.16	0.14
Epidinium	0.32	0.06	0.05	1.02	2.26	0.11	0.09
Trichostomatia_XX	0.23	0.05	0.04	1.24	2.47	0.11	0.07
