# Supplementary material for: A diet containing Moringa oleifera alters the goat rumen microbiome: an insight into bacteria, ciliates and rumen anaerobic fungi
Source: Research Square preprint supplement (doi:10.21203/rs.3.rs-8826260/v1), 2026-02-23
Supplement: Supplementary file 7 [file fcd1711b5801ac44986288b0.xlsx]

## Sheet: 3A
Supplementry Table 3A: Groupwise and samplewise mean relative abundance (%) of bacterial phyla present in rumen solid fraction.
Phylum	p-values	MS: mean rel. freq. (%)	MS: std. dev. (%)	20%MLM: mean rel. freq. (%)	20%MLM: std. dev. (%)	30%MLM: mean rel. freq. (%)	30%MLM: std. dev. (%)	G21S	G21S: parent seq. count	G21S: rel. freq. (%)	G22S	G22S: parent seq. count	G22S: rel. freq. (%)	G23S	G23S: parent seq. count	G23S: rel. freq. (%)	G24S	G24S: parent seq. count	G24S: rel. freq. (%)	G25S	G25S: parent seq. count	G25S: rel. freq. (%)	G26S	G26S: parent seq. count	G26S: rel. freq. (%)	G27S	G27S: parent seq. count	G27S: rel. freq. (%)	G28S	G28S: parent seq. count	G28S: rel. freq. (%)	G310S	G310S: parent seq. count	G310S: rel. freq. (%)	G31S	G31S: parent seq. count	G31S: rel. freq. (%)	G33S	G33S: parent seq. count	G33S: rel. freq. (%)	G34S	G34S: parent seq. count	G34S: rel. freq. (%)	G37S	G37S: parent seq. count	G37S: rel. freq. (%)	G38S	G38S: parent seq. count	G38S: rel. freq. (%)
Bacteroidota	0.160454	53.5947	5.32959	53.6711	7.6449	45.2734	10.1213	35530	74963	47.3967	29455	74963	39.2927	40019	74963	53.385	41725	74963	55.6608	48185	74963	64.2784	43116	74963	57.5164	37178	74963	49.5951	46660	74963	62.244	16363	74963	21.8281	33369	74963	44.514	36872	74963	49.1869	34525	74963	46.0561	41806	74963	55.7688	37510	74963	50.038
Bacillota	0.11927	28.0941	1.98565	32.6666	5.91487	35.9978	6.98406	28341	74963	37.8067	30416	74963	40.5747	25492	74963	34.0061	23566	74963	31.4368	17321	74963	23.1061	23622	74963	31.5115	28654	74963	38.2242	18491	74963	24.6668	37596	74963	50.1527	30396	74963	40.548	25385	74963	33.8634	27395	74963	36.5447	20305	74963	27.0867	24736	74963	32.9976
Verrucomicrobiota	0.0652708	6.82097	1.87586	3.79671	1.61452	6.35514	2.90994	2723	74963	3.63246	5806	74963	7.74515	1952	74963	2.60395	2978	74963	3.97263	1959	74963	2.61329	1734	74963	2.31314	3031	74963	4.04333	2586	74963	3.4497	8702	74963	11.6084	4035	74963	5.38266	2478	74963	3.30563	2061	74963	2.74936	5131	74963	6.84471	4128	74963	5.50672
Actinomycetota	0.00761967	2.60529	1.03251	0.703013	0.337062	1.75058	1.11577	466	74963	0.62164	979	74963	1.30598	782	74963	1.04318	327	74963	0.436215	237	74963	0.316156	351	74963	0.468231	740	74963	0.987154	334	74963	0.445553	2616	74963	3.48972	727	74963	0.969812	722	74963	0.963142	385	74963	0.513587	1230	74963	1.64081	962	74963	1.2833
Pseudomonadota	0.0190675	1.87292	0.205585	3.68115	1.12251	5.33597	2.64629	3761	74963	5.01714	3662	74963	4.88508	3229	74963	4.30746	2474	74963	3.30029	3343	74963	4.45953	1323	74963	1.76487	1707	74963	2.27712	2577	74963	3.4377	3881	74963	5.17722	1813	74963	2.41853	6290	74963	8.39081	7567	74963	10.0943	2891	74963	3.85657	3313	74963	4.41951
Cyanobacteriota	0.00014599	1.58371	0.550608	0.54777	0.203594	0.589053	0.199336	433	74963	0.577618	473	74963	0.630978	753	74963	1.0045	320	74963	0.426877	193	74963	0.25746	359	74963	0.478903	331	74963	0.441551	423	74963	0.564278	665	74963	0.887104	357	74963	0.476235	524	74963	0.699012	151	74963	0.201433	530	74963	0.707015	432	74963	0.576284
Synergistota	0.060026	1.42364	1.17436	0.564112	0.287326	0.490909	0.136271	689	74963	0.91912	200	74963	0.266798	415	74963	0.553606	560	74963	0.747035	188	74963	0.25079	783	74963	1.04452	238	74963	0.31749	310	74963	0.413537	372	74963	0.496245	480	74963	0.640316	339	74963	0.452223	212	74963	0.282806	267	74963	0.356176	526	74963	0.701679
Fibrobacterota	0.00984148	1.29904	0.589411	0.710184	0.446494	0.37104	0.151461	552	74963	0.736363	195	74963	0.260128	191	74963	0.254792	1062	74963	1.4167	638	74963	0.851087	463	74963	0.617638	152	74963	0.202767	1006	74963	1.342	158	74963	0.210771	222	74963	0.296146	337	74963	0.449555	108	74963	0.144071	353	74963	0.470899	307	74963	0.409535
Spirochaetota	0.264728	0.905247	0.312782	1.13673	0.628753	0.712161	0.223306	585	74963	0.780385	547	74963	0.729693	380	74963	0.506917	451	74963	0.60163	1629	74963	2.17307	1248	74963	1.66482	524	74963	0.699012	1453	74963	1.93829	516	74963	0.68834	378	74963	0.504249	396	74963	0.528261	409	74963	0.545602	716	74963	0.955138	850	74963	1.13389
Lentisphaerota	0.131827	0.346037	0.139371	0.18826	0.103888	0.317299	0.16038	81	74963	0.108053	78	74963	0.104051	91	74963	0.121393	59	74963	0.0787055	216	74963	0.288142	135	74963	0.180089	300	74963	0.400197	169	74963	0.225445	369	74963	0.492243	188	74963	0.25079	171	74963	0.228113	41	74963	0.0546936	432	74963	0.576284	216	74963	0.288142
Euryarchaeota	0.830184	0.31829	0.281527	0.246788	0.13899	0.287952	0.168253	149	74963	0.198765	283	74963	0.37752	389	74963	0.518923	208	74963	0.27747	69	74963	0.0920454	100	74963	0.133399	209	74963	0.278804	73	74963	0.0973814	476	74963	0.63498	170	74963	0.226779	228	74963	0.30415	66	74963	0.0880434	84	74963	0.112055	249	74963	0.332164
Planctomycetota	0.516988	0.243053	0.0909598	0.171418	0.148175	0.249838	0.133362	155	74963	0.206769	409	74963	0.545602	105	74963	0.140069	58	74963	0.0773715	36	74963	0.0480237	73	74963	0.0973814	101	74963	0.134733	91	74963	0.121393	406	74963	0.541601	205	74963	0.273468	83	74963	0.110721	137	74963	0.182757	97	74963	0.129397	181	74963	0.241452
Acidobacteriota	0.22068	0.186759	0.0546318	0.122894	0.0350883	0.240309	0.18569	115	74963	0.153409	86	74963	0.114723	84	74963	0.112055	66	74963	0.0880434	50	74963	0.0666996	96	74963	0.128063	141	74963	0.188093	99	74963	0.132065	517	74963	0.689674	100	74963	0.133399	116	74963	0.154743	108	74963	0.144071	116	74963	0.154743	133	74963	0.177421
Chloroflexota	0.0166288	0.165949	0.0587962	0.318657	0.100995	0.229447	0.0583263	344	74963	0.458893	187	74963	0.249456	214	74963	0.285474	89	74963	0.118725	227	74963	0.302816	308	74963	0.410869	303	74963	0.404199	239	74963	0.318824	188	74963	0.25079	173	74963	0.230781	255	74963	0.340168	119	74963	0.158745	169	74963	0.225445	185	74963	0.246788
Plantae	0.00190057	0.140336	0.0754025	0.0348505	0.0206816	0.0464991	0.0208916	42	74963	0.0560276	50	74963	0.0666996	39	74963	0.0520257	6	74963	0.00800395	12	74963	0.0160079	15	74963	0.0200099	13	74963	0.0173419	32	74963	0.0426877	60	74963	0.0800395	24	74963	0.0320158	47	74963	0.0626976	20	74963	0.0266798	38	74963	0.0506917	43	74963	0.0573616
Mycoplasmatota	0.00891171	0.068834	0.0553541	0.320992	0.159671	0.51473	0.283374	240	74963	0.320158	154	74963	0.205435	200	74963	0.266798	518	74963	0.691008	288	74963	0.38419	168	74963	0.224111	260	74963	0.346838	97	74963	0.129397	447	74963	0.596294	769	74963	1.02584	240	74963	0.320158	363	74963	0.484239	222	74963	0.296146	565	74963	0.753705
Balneolota	0.192591	0.0541601	0.0411994	0.0483572	0.0369551	0.020391	0.00824533	20	74963	0.0266798	9	74963	0.0120059	10	74963	0.0133399	87	74963	0.116057	29	74963	0.0386858	34	74963	0.0453557	77	74963	0.102717	24	74963	0.0320158	2	74963	0.00266798	20	74963	0.0266798	21	74963	0.0280138	20	74963	0.0266798	15	74963	0.0200099	12	74963	0.0160079
Elusimicrobiota	0.783295	0.0504249	0.0380541	0.0653656	0.0436258	0.0676524	0.0399416	52	74963	0.0693676	28	74963	0.0373518	45	74963	0.0600296	6	74963	0.00800395	47	74963	0.0626976	59	74963	0.0787055	125	74963	0.166749	30	74963	0.0400197	10	74963	0.0133399	108	74963	0.144071	43	74963	0.0573616	62	74963	0.0827075	67	74963	0.0893774	43	74963	0.0573616
Campylobacterota	0.14772	0.0445553	0.0203117	0.10772	0.0695525	0.0848037	0.0336485	73	74963	0.0973814	53	74963	0.0707015	41	74963	0.0546936	118	74963	0.157411	52	74963	0.0693676	205	74963	0.273468	56	74963	0.0747035	48	74963	0.0640316	63	74963	0.0840415	64	74963	0.0853755	56	74963	0.0747035	33	74963	0.0440217	74	74963	0.0987154	116	74963	0.154743
Candidatus_Saccharibacteria	0.119282	0.0440217	0.0168104	0.616137	0.650573	0.849943	0.702411	454	74963	0.605632	1665	74963	2.2211	341	74963	0.454891	197	74963	0.262796	104	74963	0.138735	205	74963	0.273468	645	74963	0.860424	84	74963	0.112055	1447	74963	1.93029	1146	74963	1.52875	179	74963	0.238784	1104	74963	1.47273	235	74963	0.313488	239	74963	0.318824
Rhodothermota	0.671193	0.0226779	0.0103674	0.0250123	0.0112355	0.0287761	0.0110892	18	74963	0.0240118	11	74963	0.0146739	6	74963	0.00800395	12	74963	0.0160079	29	74963	0.0386858	17	74963	0.0226779	29	74963	0.0386858	28	74963	0.0373518	21	74963	0.0280138	19	74963	0.0253458	35	74963	0.0466897	6	74963	0.00800395	18	74963	0.0240118	27	74963	0.0360178
Poribacteria	0.739556	0.0176087	0.00906329	0.0238451	0.0188942	0.0198193	0.00735611	19	74963	0.0253458	15	74963	0.0200099	53	74963	0.0707015	2	74963	0.00266798	9	74963	0.0120059	16	74963	0.0213439	16	74963	0.0213439	13	74963	0.0173419	14	74963	0.0186759	20	74963	0.0266798	14	74963	0.0186759	5	74963	0.00666996	24	74963	0.0320158	13	74963	0.0173419
Chlamydiota	0.68686	0.0130731	0.00542854	0.0110054	0.00879195	0.0165796	0.0161479	6	74963	0.00800395	0	74963	0	19	74963	0.0253458	1	74963	0.00133399	8	74963	0.0106719	5	74963	0.00666996	18	74963	0.0240118	9	74963	0.0120059	10	74963	0.0133399	6	74963	0.00800395	2	74963	0.00266798	2	74963	0.00266798	39	74963	0.0520257	9	74963	0.0120059
Thermomicrobiota	0.0131234	0.0128063	0.00907114	0.00283473	0.00193745	0.00323969	0.00376346	2	74963	0.00266798	0	74963	0	1	74963	0.00133399	1	74963	0.00133399	2	74963	0.00266798	3	74963	0.00400197	3	74963	0.00400197	5	74963	0.00666996	1	74963	0.00133399	2	74963	0.00266798	0	74963	0	1	74963	0.00133399	3	74963	0.00400197	1	74963	0.00133399
Armatimonadota	0.468709	0.0112055	0.00474271	0.0160079	0.00733695	0.0169607	0.00926179	8	74963	0.0106719	10	74963	0.0133399	23	74963	0.0306818	6	74963	0.00800395	9	74963	0.0120059	8	74963	0.0106719	18	74963	0.0240118	14	74963	0.0186759	9	74963	0.0120059	26	74963	0.0346838	15	74963	0.0200099	1	74963	0.00133399	13	74963	0.0173419	14	74963	0.0186759
Latescibacteria	0.468452	0.0101383	0.0082492	0.00566946	0.0028101	0.00952851	0.00826732	7	74963	0.00933794	4	74963	0.00533597	8	74963	0.0106719	4	74963	0.00533597	4	74963	0.00533597	1	74963	0.00133399	3	74963	0.00400197	3	74963	0.00400197	1	74963	0.00133399	5	74963	0.00666996	15	74963	0.0200099	5	74963	0.00666996	1	74963	0.00133399	18	74963	0.0240118
Thermotogota	0.829607	0.00640316	0.00371607	0.00550271	0.00349378	0.00495483	0.00395175	8	74963	0.0106719	1	74963	0.00133399	1	74963	0.00133399	6	74963	0.00800395	6	74963	0.00800395	1	74963	0.00133399	6	74963	0.00800395	4	74963	0.00533597	7	74963	0.00933794	8	74963	0.0106719	0	74963	0	2	74963	0.00266798	2	74963	0.00266798	1	74963	0.00133399
Deinococcota	0.439266	0.00560276	0.00433496	0.00466897	0.00333498	0.00762281	0.0045498	7	74963	0.00933794	4	74963	0.00533597	3	74963	0.00400197	1	74963	0.00133399	1	74963	0.00133399	2	74963	0.00266798	8	74963	0.0106719	2	74963	0.00266798	5	74963	0.00666996	5	74963	0.00666996	11	74963	0.0146739	3	74963	0.00400197	9	74963	0.0120059	7	74963	0.00933794
Parcubacteria	0.379815	0.00560276	0.00351931	0.00383523	0.00355688	0.0070511	0.00476807	0	74963	0	3	74963	0.00400197	7	74963	0.00933794	0	74963	0	0	74963	0	6	74963	0.00800395	2	74963	0.00266798	5	74963	0.00666996	5	74963	0.00666996	5	74963	0.00666996	5	74963	0.00666996	1	74963	0.00133399	2	74963	0.00266798	6	74963	0.00800395
Gemmatimonadota	0.0342536	0.00453557	0.00247419	0.00133399	0.00188655	0.00152456	0.00150055	2	74963	0.00266798	0	74963	0	0	74963	0	0	74963	0	0	74963	0	0	74963	0	4	74963	0.00533597	2	74963	0.00266798	2	74963	0.00266798	1	74963	0.00133399	0	74963	0	0	74963	0	2	74963	0.00266798	3	74963	0.00400197
SR1	0.182774	0.00400197	0.00337476	0.139902	0.184833	0.0550748	0.0272055	55	74963	0.0733695	152	74963	0.202767	53	74963	0.0707015	27	74963	0.0360178	26	74963	0.0346838	457	74963	0.609634	35	74963	0.0466897	34	74963	0.0453557	15	74963	0.0200099	76	74963	0.101383	46	74963	0.0613636	29	74963	0.0386858	42	74963	0.0560276	61	74963	0.0813735
Aquificota	0.231473	0.00346838	0.00180951	0.00566946	0.00436105	0.00228684	0.00308465	4	74963	0.00533597	12	74963	0.0160079	3	74963	0.00400197	5	74963	0.00666996	3	74963	0.00400197	1	74963	0.00133399	5	74963	0.00666996	1	74963	0.00133399	2	74963	0.00266798	1	74963	0.00133399	0	74963	0	0	74963	0	2	74963	0.00266798	7	74963	0.00933794
candidate_division_WPS_2	0.733214	0.00320158	0.00640316	0.00566946	0.00835078	0.00285855	0.00485861	0	74963	0	0	74963	0	0	74963	0	0	74963	0	17	74963	0.0226779	12	74963	0.0160079	5	74963	0.00666996	0	74963	0	1	74963	0.00133399	1	74963	0.00133399	1	74963	0.00133399	11	74963	0.0146739	1	74963	0.00133399	0	74963	0
Deferribacterota	0.472696	0.00293478	0.00272082	0.00166749	0.00145368	0.00152456	0.00166135	1	74963	0.00133399	0	74963	0	1	74963	0.00133399	1	74963	0.00133399	3	74963	0.00400197	0	74963	0	3	74963	0.00400197	1	74963	0.00133399	1	74963	0.00133399	4	74963	0.00533597	0	74963	0	1	74963	0.00133399	0	74963	0	1	74963	0.00133399
Chlorobiota	0.457914	0.00213439	0.00180951	0.00333498	0.0017647	0.00247741	0.00132031	4	74963	0.00533597	3	74963	0.00400197	3	74963	0.00400197	3	74963	0.00400197	0	74963	0	4	74963	0.00533597	1	74963	0.00133399	2	74963	0.00266798	1	74963	0.00133399	1	74963	0.00133399	4	74963	0.00533597	2	74963	0.00266798	1	74963	0.00133399	2	74963	0.00266798
Kiritimatiellota	0.469676	0.00213439	0.00136041	0.00633646	0.00816219	0.00476426	0.00245533	0	74963	0	1	74963	0.00133399	2	74963	0.00266798	4	74963	0.00533597	3	74963	0.00400197	20	74963	0.0266798	7	74963	0.00933794	1	74963	0.00133399	6	74963	0.00800395	4	74963	0.00533597	4	74963	0.00533597	0	74963	0	4	74963	0.00533597	5	74963	0.00666996
Fusobacteriota	0.0683331	0.00186759	0.00180951	0.00733695	0.00600296	0.0110531	0.0071559	11	74963	0.0146739	0	74963	0	4	74963	0.00533597	11	74963	0.0146739	11	74963	0.0146739	3	74963	0.00400197	4	74963	0.00533597	0	74963	0	3	74963	0.00400197	8	74963	0.0106719	20	74963	0.0266798	6	74963	0.00800395	8	74963	0.0106719	10	74963	0.0133399
Nitrospinota	0.573267	0.00160079	0.000533597	0.00266798	0.00258326	0.00171513	0.0015482	2	74963	0.00266798	6	74963	0.00800395	0	74963	0	4	74963	0.00533597	2	74963	0.00266798	1	74963	0.00133399	0	74963	0	1	74963	0.00133399	0	74963	0	0	74963	0	2	74963	0.00266798	0	74963	0	2	74963	0.00266798	3	74963	0.00400197
Thermodesulfobacteriota	0.19636	0.00160079	0.00155569	0.000666996	0.000943274	0.0019057	0.00120527	0	74963	0	0	74963	0	1	74963	0.00133399	0	74963	0	0	74963	0	0	74963	0	1	74963	0.00133399	2	74963	0.00266798	0	74963	0	2	74963	0.00266798	2	74963	0.00266798	0	74963	0	2	74963	0.00266798	2	74963	0.00266798
Microgenomates	0.0555835	0.00133399	0.00168738	0.00133399	0.00149145	0.00686053	0.00666723	2	74963	0.00266798	0	74963	0	0	74963	0	0	74963	0	1	74963	0.00133399	0	74963	0	3	74963	0.00400197	2	74963	0.00266798	5	74963	0.00666996	7	74963	0.00933794	0	74963	0	1	74963	0.00133399	2	74963	0.00266798	16	74963	0.0213439
Nitrospirota	0.238265	0.00133399	0.00206661	0.00400197	0.0032676	0.00209627	0.0021221	1	74963	0.00133399	4	74963	0.00533597	0	74963	0	0	74963	0	3	74963	0.00400197	6	74963	0.00800395	7	74963	0.00933794	3	74963	0.00400197	0	74963	0	4	74963	0.00533597	1	74963	0.00133399	0	74963	0	3	74963	0.00400197	3	74963	0.00400197
BRC1	0.935441	0.00106719	0.00130704	0.000833745	0.00132353	0.000762281	0.0014004	0	74963	0	0	74963	0	1	74963	0.00133399	0	74963	0	0	74963	0	3	74963	0.00400197	0	74963	0	1	74963	0.00133399	0	74963	0	0	74963	0	0	74963	0	1	74963	0.00133399	0	74963	0	3	74963	0.00400197
Hydrogenedentes	0.856832	0.00106719	0.00130704	0.000833745	0.00175681	0.000571711	0.000971721	0	74963	0	0	74963	0	0	74963	0	0	74963	0	1	74963	0.00133399	0	74963	0	0	74963	0	4	74963	0.00533597	0	74963	0	0	74963	0	0	74963	0	0	74963	0	2	74963	0.00266798	1	74963	0.00133399
Marinimicrobia	0.928332	0.000533597	0.00065352	0.000333498	0.000882352	0.00038114	0.0009336	0	74963	0	2	74963	0.00266798	0	74963	0	0	74963	0	0	74963	0	0	74963	0	0	74963	0	0	74963	0	0	74963	0	0	74963	0	0	74963	0	0	74963	0	0	74963	0	2	74963	0.00266798
Atribacterota	0.0955434	0	0	0.000500247	0.000928419	0.00457368	0.00604441	1	74963	0.00133399	0	74963	0	0	74963	0	0	74963	0	2	74963	0.00266798	0	74963	0	0	74963	0	0	74963	0	0	74963	0	14	74963	0.0186759	4	74963	0.00533597	0	74963	0	3	74963	0.00400197	1	74963	0.00133399
Caldisericota	0.69202	0	0	0.000333498	0.000882352	0.00019057	0.0004668	0	74963	0	0	74963	0	2	74963	0.00266798	0	74963	0	0	74963	0	0	74963	0	0	74963	0	0	74963	0	0	74963	0	0	74963	0	0	74963	0	0	74963	0	0	74963	0	1	74963	0.00133399
[truncated: 18 more columns]

## Sheet: 3B
Supplementry Table 3B : Groupwise and samplewise mean relative abundance (%) of bacterial phyla present in rumen liquid fraction.
Phylum	p-values	MS: mean rel. freq. (%)	MS: std. dev. (%)	20%MLM: mean rel. freq. (%)	20%MLM: std. dev. (%)	30%MLM: mean rel. freq. (%)	30%MLM: std. dev. (%)	G21L	G21L: parent seq. count	G21L: rel. freq. (%)	G22L	G22L: parent seq. count	G22L: rel. freq. (%)	G23L	G23L: parent seq. count	G23L: rel. freq. (%)	G24L	G24L: parent seq. count	G24L: rel. freq. (%)	G28L	G28L: parent seq. count	G28L: rel. freq. (%)	G310L	G310L: parent seq. count	G310L: rel. freq. (%)	G31L	G31L: parent seq. count	G31L: rel. freq. (%)	G32L	G32L: parent seq. count	G32L: rel. freq. (%)	G33L	G33L: parent seq. count	G33L: rel. freq. (%)	G34L	G34L: parent seq. count	G34L: rel. freq. (%)	G35L	G35L: parent seq. count	G35L: rel. freq. (%)	G37L	G37L: parent seq. count	G37L: rel. freq. (%)	G38L	G38L: parent seq. count	G38L: rel. freq. (%)	G39L	G39L: parent seq. count	G39L: rel. freq. (%)
Bacteroidota	0.166225	43.5255	6.66876	31.5092	9.51674	40.8969	9.59748	18966	61707	30.7356	10054	61707	16.2931	18357	61707	29.7487	21538	61707	34.9037	28302	61707	45.8651	9415	61707	15.2576	25886	61707	41.9499	29044	61707	47.0676	27875	61707	45.1732	31633	61707	51.2632	26719	61707	43.2998	25588	61707	41.4669	25713	61707	41.6695	25253	61707	40.924
Bacillota	0.177843	33.1065	4.76052	43.6317	7.40456	42.5734	9.50874	30811	61707	49.9311	30310	61707	49.1192	28832	61707	46.724	26334	61707	42.6759	18332	61707	29.7081	41430	61707	67.1399	25506	61707	41.334	21810	61707	35.3445	22323	61707	36.1758	19673	61707	31.8813	26023	61707	42.1719	26718	61707	43.2982	26708	61707	43.282	26246	61707	42.5333
Actinomycetota	0.00224695	6.42229	3.77295	2.60781	0.787151	1.17149	0.315754	2097	61707	3.39832	2004	61707	3.24761	1762	61707	2.85543	1428	61707	2.31416	755	61707	1.22352	1148	61707	1.8604	628	61707	1.01771	530	61707	0.858898	722	61707	1.17005	409	61707	0.66281	786	61707	1.27376	732	61707	1.18625	718	61707	1.16356	833	61707	1.34993
Verrucomicrobiota	0.00222788	6.31371	2.29013	13.7693	5.86319	5.05885	1.03299	4778	61707	7.74304	15298	61707	24.7914	7887	61707	12.7814	6277	61707	10.1723	8243	61707	13.3583	2968	61707	4.80983	4275	61707	6.9279	2823	61707	4.57485	3131	61707	5.07398	4228	61707	6.85173	2326	61707	3.76943	2821	61707	4.5716	2703	61707	4.38038	2820	61707	4.56998
Pseudomonadota	0.713422	3.74876	2.03188	4.13308	0.614032	4.52029	1.45882	2272	61707	3.68192	2379	61707	3.85532	2284	61707	3.70136	3285	61707	5.32355	2532	61707	4.10326	2430	61707	3.93796	2105	61707	3.41128	3540	61707	5.73679	4881	61707	7.90996	1693	61707	2.74361	2995	61707	4.85358	2283	61707	3.69974	2292	61707	3.71433	2885	61707	4.67532
Spirochaetota	0.0283127	1.43339	0.768642	0.728605	0.51284	0.49049	0.206627	295	61707	0.478066	175	61707	0.283598	240	61707	0.388935	492	61707	0.797316	1046	61707	1.69511	125	61707	0.20257	220	61707	0.356524	216	61707	0.350041	294	61707	0.476445	601	61707	0.973958	267	61707	0.43269	375	61707	0.607711	361	61707	0.585023	265	61707	0.429449
Cyanobacteriota	0.0708829	1.1429	0.789581	0.49492	0.374288	0.446915	0.153163	149	61707	0.241464	194	61707	0.314389	765	61707	1.23973	220	61707	0.356524	199	61707	0.322492	218	61707	0.353282	179	61707	0.290081	141	61707	0.228499	401	61707	0.649845	224	61707	0.363006	223	61707	0.361385	387	61707	0.627157	312	61707	0.505615	397	61707	0.643363
Synergistota	0.655865	0.857682	0.682393	0.568493	0.332171	0.849354	0.53781	632	61707	1.02419	110	61707	0.178262	154	61707	0.249566	534	61707	0.86538	324	61707	0.525062	306	61707	0.495892	410	61707	0.66443	1395	61707	2.26068	309	61707	0.500754	266	61707	0.431069	301	61707	0.487789	556	61707	0.901032	570	61707	0.92372	604	61707	0.978819
Fibrobacterota	0.222589	0.76369	0.757122	0.400603	0.292534	0.281438	0.147861	174	61707	0.281978	40	61707	0.0648225	155	61707	0.251187	569	61707	0.9221	298	61707	0.482927	42	61707	0.0680636	188	61707	0.304666	164	61707	0.265772	203	61707	0.328974	375	61707	0.607711	50	61707	0.0810281	197	61707	0.319251	177	61707	0.286839	167	61707	0.270634
Lentisphaerota	0.197315	0.64782	0.420225	0.35069	0.376484	0.28954	0.101288	119	61707	0.192847	69	61707	0.111819	86	61707	0.139368	129	61707	0.209052	679	61707	1.10036	186	61707	0.301424	116	61707	0.187985	258	61707	0.418105	126	61707	0.204191	112	61707	0.181503	300	61707	0.486169	143	61707	0.23174	155	61707	0.251187	212	61707	0.343559
Mycoplasmatota	0.030754	0.261721	0.114903	0.207432	0.13345	0.682256	0.396713	188	61707	0.304666	63	61707	0.102095	54	61707	0.0875103	261	61707	0.422967	74	61707	0.119922	689	61707	1.11657	626	61707	1.01447	84	61707	0.136127	255	61707	0.413243	852	61707	1.38072	200	61707	0.324112	435	61707	0.704944	448	61707	0.726012	200	61707	0.324112
Euryarchaeota	0.00329612	0.246325	0.0702939	0.366571	0.153094	0.742037	0.261557	132	61707	0.213914	178	61707	0.28846	407	61707	0.659569	207	61707	0.335456	207	61707	0.335456	451	61707	0.730873	308	61707	0.499133	528	61707	0.855657	351	61707	0.568817	280	61707	0.453757	386	61707	0.625537	449	61707	0.727632	516	61707	0.83621	852	61707	1.38072
Acidobacteriota	0.372893	0.228904	0.0437758	0.0969096	0.0319773	0.183484	0.178757	86	61707	0.139368	75	61707	0.121542	41	61707	0.066443	34	61707	0.0550991	63	61707	0.102095	415	61707	0.672533	53	61707	0.0858898	103	61707	0.166918	107	61707	0.1734	127	61707	0.205811	49	61707	0.0794075	50	61707	0.0810281	66	61707	0.106957	49	61707	0.0794075
Chloroflexota	0.000361599	0.215535	0.0678897	0.29397	0.171644	0.671093	0.16617	303	61707	0.49103	63	61707	0.102095	135	61707	0.218776	93	61707	0.150712	313	61707	0.507236	433	61707	0.701703	286	61707	0.463481	500	61707	0.810281	247	61707	0.400279	599	61707	0.970716	426	61707	0.690359	450	61707	0.729253	448	61707	0.726012	338	61707	0.54775
Candidatus_Saccharibacteria	0.407457	0.214724	0.175285	0.380508	0.256572	0.593126	0.57045	386	61707	0.625537	465	61707	0.753561	120	61707	0.194467	121	61707	0.196088	82	61707	0.132886	1274	61707	2.0646	634	61707	1.02744	103	61707	0.166918	160	61707	0.25929	296	61707	0.479686	189	61707	0.306286	231	61707	0.37435	200	61707	0.324112	207	61707	0.335456
Planctomycetota	0.0368012	0.213509	0.09021	0.112467	0.0361004	0.11614	0.0418706	69	61707	0.111819	82	61707	0.132886	55	61707	0.0891309	38	61707	0.0615813	103	61707	0.166918	50	61707	0.0810281	76	61707	0.123163	122	61707	0.197709	42	61707	0.0680636	52	61707	0.0842692	57	61707	0.092372	70	61707	0.113439	66	61707	0.106957	110	61707	0.178262
Plantae	4.54796e-05	0.156384	0.058492	0.0340318	0.015374	0.0320511	0.0155021	12	61707	0.0194467	21	61707	0.0340318	39	61707	0.0632019	18	61707	0.0291701	15	61707	0.0243084	15	61707	0.0243084	10	61707	0.0162056	4	61707	0.00648225	34	61707	0.0550991	15	61707	0.0243084	29	61707	0.0469963	16	61707	0.025929	30	61707	0.0486169	25	61707	0.040514
Campylobacterota	0.176071	0.128024	0.0686208	0.0615813	0.0316404	0.0986742	0.0405424	61	61707	0.0988543	36	61707	0.0583402	3	61707	0.00486169	50	61707	0.0810281	40	61707	0.0648225	33	61707	0.0534785	28	61707	0.0453757	22	61707	0.0356524	66	61707	0.106957	64	61707	0.103716	83	61707	0.134507	93	61707	0.150712	77	61707	0.124783	82	61707	0.132886
Elusimicrobiota	0.10042	0.0615813	0.050172	0.0220396	0.0139255	0.0932723	0.0621667	26	61707	0.0421346	7	61707	0.0113439	7	61707	0.0113439	6	61707	0.00972337	22	61707	0.0356524	16	61707	0.025929	65	61707	0.105337	111	61707	0.179882	38	61707	0.0615813	96	61707	0.155574	117	61707	0.189606	21	61707	0.0340318	29	61707	0.0469963	25	61707	0.040514
Balneolota	0.160452	0.0583402	0.040595	0.0158815	0.0112929	0.0349321	0.0284214	4	61707	0.00648225	9	61707	0.0145851	4	61707	0.00648225	23	61707	0.0372729	9	61707	0.0145851	3	61707	0.00486169	12	61707	0.0194467	67	61707	0.108578	17	61707	0.0275495	9	61707	0.0145851	22	61707	0.0356524	14	61707	0.0226879	23	61707	0.0372729	27	61707	0.0437552
SR1	0.183666	0.0372729	0.0202732	0.0369488	0.0227664	0.0588804	0.0215805	48	61707	0.077787	26	61707	0.0421346	14	61707	0.0226879	19	61707	0.0307907	7	61707	0.0113439	25	61707	0.040514	49	61707	0.0794075	19	61707	0.0307907	35	61707	0.0567197	36	61707	0.0583402	52	61707	0.0842692	22	61707	0.0356524	30	61707	0.0486169	59	61707	0.0956131
Poribacteria	0.055125	0.0336267	0.0135283	0.0145851	0.0092244	0.0223277	0.007857	18	61707	0.0291701	7	61707	0.0113439	13	61707	0.0210673	4	61707	0.00648225	3	61707	0.00486169	9	61707	0.0145851	14	61707	0.0226879	17	61707	0.0275495	12	61707	0.0194467	22	61707	0.0356524	21	61707	0.0340318	8	61707	0.0129645	11	61707	0.0178262	10	61707	0.0162056
Rhodothermota	0.00500246	0.0239033	0.00577236	0.0142609	0.00698159	0.00648225	0.00716639	17	61707	0.0275495	9	61707	0.0145851	7	61707	0.0113439	6	61707	0.00972337	5	61707	0.00810281	0	61707	0	2	61707	0.00324112	6	61707	0.00972337	15	61707	0.0243084	0	61707	0	2	61707	0.00324112	5	61707	0.00810281	5	61707	0.00810281	1	61707	0.00162056
Latescibacteria	0.000488831	0.0206622	0.0100144	0.000972337	0.00079391	0.00270094	0.00483158	1	61707	0.00162056	1	61707	0.00162056	0	61707	0	1	61707	0.00162056	0	61707	0	0	61707	0	0	61707	0	10	61707	0.0162056	1	61707	0.00162056	1	61707	0.00162056	1	61707	0.00162056	0	61707	0	1	61707	0.00162056	1	61707	0.00162056
Parcubacteria	0.00725948	0.0186365	0.0101528	0.0025929	0.00194467	0.00486169	0.00576762	3	61707	0.00486169	3	61707	0.00486169	0	61707	0	1	61707	0.00162056	1	61707	0.00162056	2	61707	0.00324112	0	61707	0	11	61707	0.0178262	7	61707	0.0113439	0	61707	0	4	61707	0.00648225	1	61707	0.00162056	2	61707	0.00324112	0	61707	0
Chlamydiota	0.316009	0.0153953	0.00479369	0.104364	0.170772	0.0237682	0.0252216	12	61707	0.0194467	4	61707	0.00648225	274	61707	0.444034	0	61707	0	32	61707	0.051858	3	61707	0.00486169	2	61707	0.00324112	47	61707	0.0761664	2	61707	0.00324112	0	61707	0	32	61707	0.051858	20	61707	0.0324112	21	61707	0.0340318	5	61707	0.00810281
Thermomicrobiota	0.0151323	0.0145851	0.0132153	0.00194467	0.00188988	0.00108037	0.00108037	0	61707	0	0	61707	0	1	61707	0.00162056	3	61707	0.00486169	2	61707	0.00324112	0	61707	0	0	61707	0	1	61707	0.00162056	2	61707	0.00324112	0	61707	0	0	61707	0	1	61707	0.00162056	1	61707	0.00162056	1	61707	0.00162056
Armatimonadota	0.102651	0.0125594	0.00463704	0.00615813	0.00188988	0.00900312	0.00412182	6	61707	0.00972337	4	61707	0.00648225	3	61707	0.00486169	3	61707	0.00486169	3	61707	0.00486169	7	61707	0.0113439	3	61707	0.00486169	4	61707	0.00648225	9	61707	0.0145851	10	61707	0.0162056	6	61707	0.00972337	2	61707	0.00324112	5	61707	0.00810281	4	61707	0.00648225
Gemmatimonadota	0.005127	0.0125594	0.00821347	0.000324112	0.000648225	0.00486169	0.0025337	0	61707	0	0	61707	0	1	61707	0.00162056	0	61707	0	0	61707	0	2	61707	0.00324112	2	61707	0.00324112	2	61707	0.00324112	6	61707	0.00972337	2	61707	0.00324112	4	61707	0.00648225	3	61707	0.00486169	1	61707	0.00162056	5	61707	0.00810281
Fusobacteriota	0.564489	0.0109388	0.0126245	0.00486169	0.00502113	0.00702243	0.00566553	8	61707	0.0129645	0	61707	0	0	61707	0	5	61707	0.00810281	2	61707	0.00324112	2	61707	0.00324112	4	61707	0.00648225	13	61707	0.0210673	2	61707	0.00324112	3	61707	0.00486169	5	61707	0.00810281	0	61707	0	6	61707	0.00972337	4	61707	0.00648225
Deinococcota	0.140868	0.00891309	0.00798034	0.0100475	0.00783253	0.00342119	0.0011944	14	61707	0.0226879	9	61707	0.0145851	0	61707	0	4	61707	0.00648225	4	61707	0.00648225	2	61707	0.00324112	1	61707	0.00162056	3	61707	0.00486169	1	61707	0.00162056	2	61707	0.00324112	2	61707	0.00324112	3	61707	0.00486169	2	61707	0.00324112	3	61707	0.00486169
Aquificota	0.00577146	0.00850795	0.00289328	0.00291701	0.00360916	0.00162056	0.0020212	6	61707	0.00972337	1	61707	0.00162056	0	61707	0	0	61707	0	2	61707	0.00324112	0	61707	0	0	61707	0	0	61707	0	2	61707	0.00324112	3	61707	0.00486169	1	61707	0.00162056	0	61707	0	0	61707	0	3	61707	0.00486169
Nitrospirota	0.000963239	0.00688739	0.00176597	0.00129645	0.00158782	0.00108037	0.00216075	2	61707	0.00324112	0	61707	0	0	61707	0	2	61707	0.00324112	0	61707	0	2	61707	0.00324112	0	61707	0	0	61707	0	0	61707	0	0	61707	0	4	61707	0.00648225	0	61707	0	0	61707	0	0	61707	0
Thermotogota	0.104645	0.00607711	0.00434465	0.00194467	0.00158782	0.002881	0.00183628	3	61707	0.00486169	1	61707	0.00162056	1	61707	0.00162056	0	61707	0	1	61707	0.00162056	2	61707	0.00324112	2	61707	0.00324112	0	61707	0	1	61707	0.00162056	3	61707	0.00486169	4	61707	0.00648225	2	61707	0.00324112	1	61707	0.00162056	1	61707	0.00162056
BRC1	0.0158369	0.00445654	0.00210517	0.00162056	0.00144947	0.00108037	0.00132318	2	61707	0.00324112	1	61707	0.00162056	2	61707	0.00324112	0	61707	0	0	61707	0	1	61707	0.00162056	1	61707	0.00162056	0	61707	0	2	61707	0.00324112	0	61707	0	0	61707	0	0	61707	0	0	61707	0	2	61707	0.00324112
Kiritimatiellota	0.114711	0.00364626	0.00265668	0.00162056	0.00204987	0.00072025	0.00154896	0	61707	0	3	61707	0.00486169	2	61707	0.00324112	0	61707	0	0	61707	0	0	61707	0	0	61707	0	0	61707	0	3	61707	0.00486169	0	61707	0	1	61707	0.00162056	0	61707	0	0	61707	0	0	61707	0
candidate_division_WPS_2	0.287973	0.00324112	0.00472471	0.000324112	0.000648225	0.00324112	0.00295873	0	61707	0	0	61707	0	0	61707	0	1	61707	0.00162056	0	61707	0	2	61707	0.00324112	1	61707	0.00162056	5	61707	0.00810281	0	61707	0	5	61707	0.00810281	3	61707	0.00486169	1	61707	0.00162056	1	61707	0.00162056	0	61707	0
Chlorobiota	0.800516	0.00324112	0.00162056	0.00226879	0.00300569	0.00342119	0.00319071	5	61707	0.00810281	1	61707	0.00162056	0	61707	0	0	61707	0	1	61707	0.00162056	0	61707	0	1	61707	0.00162056	2	61707	0.00324112	6	61707	0.00972337	5	61707	0.00810281	0	61707	0	2	61707	0.00324112	2	61707	0.00324112	1	61707	0.00162056
Deferribacterota	0.105317	0.00324112	0.00256233	0	0	0.00126044	0.00213053	0	61707	0	0	61707	0	0	61707	0	0	61707	0	0	61707	0	0	61707	0	0	61707	0	0	61707	0	4	61707	0.00648225	0	61707	0	1	61707	0.00162056	0	61707	0	2	61707	0.00324112	0	61707	0
Microgenomates	0.425461	0.00162056	0.00198477	0.000324112	0.000648225	0.00198069	0.00250798	0	61707	0	1	61707	0.00162056	0	61707	0	0	61707	0	0	61707	0	0	61707	0	1	61707	0.00162056	0	61707	0	2	61707	0.00324112	2	61707	0.00324112	0	61707	0	1	61707	0.00162056	0	61707	0	5	61707	0.00810281
Nitrospinota	0.200316	0.00162056	0.00162056	0.000972337	0.00129645	0.00360125	0.00312915	0	61707	0	2	61707	0.00324112	1	61707	0.00162056	0	61707	0	0	61707	0	1	61707	0.00162056	2	61707	0.00324112	2	61707	0.00324112	4	61707	0.00648225	4	61707	0.00648225	6	61707	0.00972337	1	61707	0.00162056	0	61707	0	0	61707	0
Thermodesulfobacteriota	0.636019	0.00121542	0.0013437	0.000648225	0.00079391	0.000540187	0.00108037	0	61707	0	1	61707	0.00162056	0	61707	0	1	61707	0.00162056	0	61707	0	0	61707	0	0	61707	0	0	61707	0	0	61707	0	2	61707	0.00324112	0	61707	0	0	61707	0	0	61707	0	1	61707	0.00162056
Atribacterota	0.065214	0	0	0.00129645	0.00121272	0.00648225	0.00615908	2	61707	0.00324112	0	61707	0	1	61707	0.00162056	0	61707	0	1	61707	0.00162056	0	61707	0	10	61707	0.0162056	0	61707	0	9	61707	0.0145851	0	61707	0	8	61707	0.0129645	3	61707	0.00486169	4	61707	0.00648225	2	61707	0.00324112
Chrysiogenota	0.581743	0	0	0.000972337	0.00194467	0.00072025	0.00110998	0	61707	0	0	61707	0	0	61707	0	0	61707	0	3	61707	0.00486169	0	61707	0	1	61707	0.00162056	0	61707	0	0	61707	0	2	61707	0.00324112	1	61707	0.00162056	0	61707	0	0	61707	0	0	61707	0
Cloacimonetes	0.46186	0	0	0.000972337	0.00129645	0.000900312	0.00134746	0	61707	0	1	61707	0.00162056	0	61707	0	0	61707	0	2	61707	0.00324112	0	61707	0	0	61707	0	0	61707	0	0	61707	0	0	61707	0	1	61707	0.00162056	2	61707	0.00324112	0	61707	0	2	61707	0.00324112
Hydrogenedentes	0.367333	0	0	0	0	0.000360125	0.000673732	0	61707	0	0	61707	0	0	61707	0	0	61707	0	0	61707	0	0	61707	0	0	61707	0	0	61707	0	0	61707	0	1	61707	0.00162056	0	61707	0	1	61707	0.00162056	0	61707	0	0	61707	0
[truncated: 12 more columns]

## Sheet: 3C
Supplementry Table 3C : Groupwise mean relative abundance (%) of bacterial phyla present at above one percent mean relative abundance in rumen solid and liquid fraction.
Rumen solid fraction
Phylum	MS: mean rel. freq. (%)	MS: std. dev. (%)	20%MLM: mean rel. freq. (%)	20%MLM: std. dev. (%)	30%MLM: mean rel. freq. (%)	30%MLM: std. dev. (%)	p-values
Bacteroidota	53.5947	5.32959	53.6711	7.6449	45.2734	10.1213	0.160454
Bacillota	28.0941	1.98565	32.6666	5.91487	35.9978	6.98406	0.11927
Verrucomicrobiota	6.82097	1.87586	3.79671	1.61452	6.35514	2.90994	0.0652708
Actinomycetota	2.60529	1.03251	0.703013	0.337062	1.75058	1.11577	0.00761967
Pseudomonadota	1.87292	0.205585	3.68115	1.12251	5.33597	2.64629	0.0190675
Cyanobacteriota	1.58371	0.550608	0.54777	0.203594	0.589053	0.199336	0.00014599
Synergistota	1.42364	1.17436	0.564112	0.287326	0.490909	0.136271	0.060026
Fibrobacterota	1.29904	0.589411	0.710184	0.446494	0.37104	0.151461	0.00984148
Spirochaetota	0.905247	0.312782	1.13673	0.628753	0.712161	0.223306	0.264728
Others	1.8		2.52		3.12
Bacillota:Bacteriodota	0.52		0.6		0.79
Rumen liquid fraction
Phylum	MS: mean rel. freq. (%)	MS: std. dev. (%)	20%MLM: mean rel. freq. (%)	20%MLM: std. dev. (%)	30%MLM: mean rel. freq. (%)	30%MLM: std. dev. (%)	p-values
Bacteroidota	43.5255	6.66876	31.5092	9.51674	40.8969	9.59748	0.166225
Bacillota	33.1065	4.76052	43.6317	7.40456	42.5734	9.50874	0.177843
Actinomycetota	6.42229	3.77295	2.60781	0.787151	1.17149	0.315754	0.00224695
Verrucomicrobiota	6.31371	2.29013	13.7693	5.86319	5.05885	1.03299	0.00222788
Pseudomonadota	3.74876	2.03188	4.13308	0.614032	4.52029	1.45882	0.713422
Spirochaetota	1.43339	0.768642	0.728605	0.51284	0.49049	0.206627	0.0283127
Cyanobacteriota	1.1429	0.789581	0.49492	0.374288	0.446915	0.153163	0.0708829
Others	4.31		3.13		4.84
Bacillota:Bacteriodota	0.76		1.38		1.04

## Sheet: 3D
Supplementry Table 3D: Groupwise and samplewise mean relative abundance (%) of bacterial phyla present in fecal samples.
Phylum	p-values	MS: mean rel. freq. (%)	MS: std. dev. (%)	20%MLM: mean rel. freq. (%)	20%MLM: std. dev. (%)	30%MLM: mean rel. freq. (%)	30%MLM: std. dev. (%)	G21F	G21F: parent seq. count	G21F: rel. freq. (%)	G22F	G22F: parent seq. count	G22F: rel. freq. (%)	G23F	G23F: parent seq. count	G23F: rel. freq. (%)	G24F	G24F: parent seq. count	G24F: rel. freq. (%)	G25F	G25F: parent seq. count	G25F: rel. freq. (%)	G26F	G26F: parent seq. count	G26F: rel. freq. (%)	G27F	G27F: parent seq. count	G27F: rel. freq. (%)	G28F	G28F: parent seq. count	G28F: rel. freq. (%)	G31F	G31F: parent seq. count	G31F: rel. freq. (%)	G32F	G32F: parent seq. count	G32F: rel. freq. (%)	G33F	G33F: parent seq. count	G33F: rel. freq. (%)	G34F	G34F: parent seq. count	G34F: rel. freq. (%)	G35F	G35F: parent seq. count	G35F: rel. freq. (%)	G36F	G36F: parent seq. count	G36F: rel. freq. (%)
Bacillota	0.19513	64.5483	5.66167	63.6786	1.79055	60.0912	5.76788	85308	134596	63.3808	87498	134596	65.0079	84679	134596	62.9135	89568	134596	66.5458	81361	134596	60.4483	87445	134596	64.9685	86310	134596	64.1252	83502	134596	62.039	74475	134596	55.3323	71721	134596	53.2861	75472	134596	56.073	85655	134596	63.6386	92018	134596	68.3661	69089	134596	51.3306
Bacteroidota	0.715714	18.397	2.27483	19.4874	1.57666	19.6342	4.16006	25307	134596	18.8022	26548	134596	19.7242	27705	134596	20.5838	22374	134596	16.6231	28277	134596	21.0088	28840	134596	21.4271	23715	134596	17.6194	27068	134596	20.1106	24808	134596	18.4315	24547	134596	18.2375	34270	134596	25.4614	23348	134596	17.3467	20296	134596	15.0792	37342	134596	27.7438
Pseudomonadota	0.14148	7.64648	3.72294	6.51858	1.69424	9.90578	3.77261	11769	134596	8.74394	6313	134596	4.69033	6329	134596	4.70222	10272	134596	7.63173	10862	134596	8.07008	7408	134596	5.50388	11076	134596	8.22907	6161	134596	4.5774	11158	134596	8.28999	25532	134596	18.9694	11612	134596	8.6273	9874	134596	7.33603	13161	134596	9.77815	15032	134596	11.1682
Verrucomicrobiota	0.521654	3.03395	0.967718	3.23394	1.59069	4.14557	2.67479	2958	134596	2.19769	3762	134596	2.79503	7017	134596	5.21338	3828	134596	2.84407	2523	134596	1.8745	2471	134596	1.83586	3506	134596	2.60483	8757	134596	6.50614	14601	134596	10.848	4501	134596	3.34408	5194	134596	3.85896	7385	134596	5.48679	2420	134596	1.79797	5921	134596	4.39909
Synergistota	0.613453	2.61799	0.923822	2.50156	0.579965	2.22691	0.758438	3330	134596	2.47407	4195	134596	3.11673	3604	134596	2.67764	2784	134596	2.06841	4897	134596	3.6383	2399	134596	1.78237	2805	134596	2.08401	2922	134596	2.17094	4667	134596	3.46741	3274	134596	2.43246	2274	134596	1.6895	2568	134596	1.90793	2478	134596	1.84107	1336	134596	0.9926
Spirochaetota	0.60834	0.962351	0.384355	1.19617	0.526867	1.17529	0.454522	2318	134596	1.72219	1175	134596	0.872983	926	134596	0.687985	722	134596	0.53642	2223	134596	1.65161	961	134596	0.713989	2718	134596	2.01938	1837	134596	1.36483	647	134596	0.480698	965	134596	0.71696	2112	134596	1.56914	1530	134596	1.13674	1512	134596	1.12336	2779	134596	2.0647
Mycoplasmatota	0.685619	0.442594	0.186544	0.477354	0.172862	0.393771	0.193791	648	134596	0.481441	860	134596	0.638949	527	134596	0.391542	1079	134596	0.801658	494	134596	0.367024	246	134596	0.182769	607	134596	0.450979	679	134596	0.504473	933	134596	0.693186	685	134596	0.50893	213	134596	0.158251	745	134596	0.553508	194	134596	0.144135	207	134596	0.153794
Chloroflexota	0.103763	0.36193	0.116572	0.362009	0.0655134	0.277456	0.0644484	436	134596	0.323932	454	134596	0.337306	597	134596	0.44355	511	134596	0.379655	453	134596	0.336563	314	134596	0.233291	534	134596	0.396743	599	134596	0.445036	522	134596	0.387827	304	134596	0.225861	385	134596	0.286041	341	134596	0.253351	440	134596	0.326904	235	134596	0.174597
Actinomycetota	0.821282	0.35174	0.129693	0.321239	0.072872	0.330784	0.0575453	454	134596	0.337306	383	134596	0.284555	368	134596	0.273411	492	134596	0.365538	265	134596	0.196885	578	134596	0.429433	548	134596	0.407144	371	134596	0.27564	311	134596	0.231062	419	134596	0.311302	542	134596	0.402687	555	134596	0.412345	402	134596	0.298672	357	134596	0.265238
Cyanobacteriota	0.0800225	0.306207	0.0737568	0.436306	0.122974	0.407887	0.102688	591	134596	0.439092	741	134596	0.550536	801	134596	0.595114	765	134596	0.568368	360	134596	0.267467	536	134596	0.398229	569	134596	0.422747	335	134596	0.248893	710	134596	0.527505	546	134596	0.405658	655	134596	0.486642	481	134596	0.357366	261	134596	0.193914	730	134596	0.542364
Campylobacterota	0.606165	0.211533	0.140443	0.33387	0.313305	0.249223	0.185099	352	134596	0.261523	299	134596	0.222146	42	134596	0.0312045	94	134596	0.0698386	680	134596	0.505216	1417	134596	1.05278	142	134596	0.105501	569	134596	0.422747	161	134596	0.119617	876	134596	0.650837	465	134596	0.345478	459	134596	0.341021	17	134596	0.0126304	363	134596	0.269696
Euryarchaeota	0.0282383	0.206226	0.121578	0.297279	0.0734525	0.17146	0.0541813	232	134596	0.172368	491	134596	0.364795	343	134596	0.254837	417	134596	0.309816	465	134596	0.345478	562	134596	0.417546	375	134596	0.278612	316	134596	0.234777	215	134596	0.159737	198	134596	0.147107	158	134596	0.117388	198	134596	0.147107	335	134596	0.248893	105	134596	0.0780112
Lentisphaerota	0.25582	0.20007	0.0833291	0.247593	0.0811863	0.182356	0.0620958	152	134596	0.112931	301	134596	0.223632	369	134596	0.274154	285	134596	0.211745	503	134596	0.373711	485	134596	0.360338	257	134596	0.190942	314	134596	0.233291	319	134596	0.237006	260	134596	0.193171	162	134596	0.12036	264	134596	0.196143	242	134596	0.179797	68	134596	0.0505216
Planctomycetota	0.583592	0.165256	0.039814	0.165867	0.0330175	0.146694	0.0451399	237	134596	0.176082	176	134596	0.130762	209	134596	0.15528	203	134596	0.150822	212	134596	0.157508	216	134596	0.16048	333	134596	0.247407	200	134596	0.148593	341	134596	0.253351	191	134596	0.141906	196	134596	0.145621	161	134596	0.119617	119	134596	0.0884127	146	134596	0.108473
Balneolota	0.384594	0.14042	0.111319	0.176361	0.0784645	0.11681	0.0501778	170	134596	0.126304	295	134596	0.219174	336	134596	0.249636	440	134596	0.326904	109	134596	0.0809831	210	134596	0.156022	124	134596	0.0921276	215	134596	0.159737	137	134596	0.101786	93	134596	0.0690957	149	134596	0.110702	297	134596	0.22066	60	134596	0.0445778	149	134596	0.110702
Candidatus_Saccharibacteria	0.684057	0.100088	0.0690023	0.122682	0.0589387	0.134394	0.0858262	122	134596	0.0906416	288	134596	0.213974	143	134596	0.106244	106	134596	0.0787542	87	134596	0.0646379	100	134596	0.0742964	303	134596	0.225118	172	134596	0.12779	138	134596	0.102529	14	134596	0.0104015	36	134596	0.0267467	277	134596	0.205801	271	134596	0.201343	72	134596	0.0534934
Fibrobacterota	0.0577286	0.0715368	0.0854577	0.201808	0.111109	0.210424	0.124704	8	134596	0.00594371	432	134596	0.320961	251	134596	0.186484	397	134596	0.294957	483	134596	0.358852	135	134596	0.1003	259	134596	0.192428	208	134596	0.154537	143	134596	0.106244	197	134596	0.146364	540	134596	0.401201	198	134596	0.147107	127	134596	0.0943564	508	134596	0.377426
Elusimicrobiota	0.805877	0.0625151	0.0526366	0.0585084	0.0454497	0.0468893	0.0424906	8	134596	0.00594371	114	134596	0.0846979	96	134596	0.0713246	27	134596	0.02006	38	134596	0.0282326	29	134596	0.021546	202	134596	0.150079	116	134596	0.0861838	15	134596	0.0111445	8	134596	0.00594371	53	134596	0.0393771	60	134596	0.0445778	39	134596	0.0289756	60	134596	0.0445778
Aquificota	0.205576	0.056996	0.0177678	0.0646379	0.0188287	0.047302	0.017807	60	134596	0.0445778	90	134596	0.0668668	102	134596	0.0757823	86	134596	0.0638949	130	134596	0.0965853	97	134596	0.0720675	40	134596	0.0297186	91	134596	0.0676097	69	134596	0.0512645	59	134596	0.0438349	25	134596	0.0185741	93	134596	0.0690957	79	134596	0.0586942	22	134596	0.0163452
Acidobacteriota	0.0262605	0.0453208	0.00928811	0.0669596	0.0152599	0.0488705	0.0170604	55	134596	0.040863	97	134596	0.0720675	102	134596	0.0757823	85	134596	0.063152	107	134596	0.0794972	67	134596	0.0497786	85	134596	0.063152	123	134596	0.0913846	108	134596	0.0802401	61	134596	0.0453208	47	134596	0.0349193	62	134596	0.0460638	71	134596	0.0527505	45	134596	0.0334334
Chrysiogenota	0.349998	0.0431981	0.0417052	0.0190385	0.0152757	0.0298011	0.0272745	63	134596	0.0468067	51	134596	0.0378912	29	134596	0.021546	14	134596	0.0104015	29	134596	0.021546	3	134596	0.00222889	3	134596	0.00222889	13	134596	0.00965853	60	134596	0.0445778	126	134596	0.0936135	4	134596	0.00297186	14	134596	0.0104015	16	134596	0.0118874	1	134596	0.000742964
Chlamydiota	0.640551	0.00498847	0.00388528	0.00371482	0.00234946	0.0052833	0.00354491	3	134596	0.00222889	9	134596	0.00668668	9	134596	0.00668668	4	134596	0.00297186	2	134596	0.00148593	0	134596	0	8	134596	0.00594371	5	134596	0.00371482	17	134596	0.0126304	3	134596	0.00222889	2	134596	0.00148593	5	134596	0.00371482	7	134596	0.00520075	2	134596	0.00148593
Armatimonadota	0.173216	0.00403323	0.00322281	0.00204315	0.0026202	0.00148593	0.00156631	3	134596	0.00222889	1	134596	0.000742964	0	134596	0	5	134596	0.00371482	11	134596	0.00817261	0	134596	0	2	134596	0.00148593	0	134596	0	4	134596	0.00297186	0	134596	0	4	134596	0.00297186	0	134596	0	2	134596	0.00148593	0	134596	0
Deferribacterota	0.578622	0.00329027	0.00545759	0.0040863	0.00454971	0.00660413	0.00780363	0	134596	0	2	134596	0.00148593	2	134596	0.00148593	18	134596	0.0133734	5	134596	0.00371482	13	134596	0.00965853	0	134596	0	4	134596	0.00297186	19	134596	0.0141163	1	134596	0.000742964	0	134596	0	16	134596	0.0118874	11	134596	0.00817261	0	134596	0
Fusobacteriota	0.218469	0.00233503	0.00207987	0.00826548	0.0129297	0.00165103	0.000976763	0	134596	0	3	134596	0.00222889	0	134596	0	0	134596	0	1	134596	0.000742964	45	134596	0.0334334	37	134596	0.0274897	3	134596	0.00222889	2	134596	0.00148593	3	134596	0.00222889	4	134596	0.00297186	0	134596	0	2	134596	0.00148593	3	134596	0.00222889
Kiritimatiellota	0.472597	0.00191048	0.00291444	0.000650094	0.000579976	0.00132083	0.00143459	2	134596	0.00148593	1	134596	0.000742964	1	134596	0.000742964	1	134596	0.000742964	0	134596	0	2	134596	0.00148593	0	134596	0	0	134596	0	0	134596	0	0	134596	0	1	134596	0.000742964	1	134596	0.000742964	2	134596	0.00148593	6	134596	0.00445778
Rhodothermota	0.74189	0.00180434	0.00158142	0.00130019	0.000616033	0.00181613	0.00175507	2	134596	0.00148593	2	134596	0.00148593	2	134596	0.00148593	2	134596	0.00148593	0	134596	0	1	134596	0.000742964	2	134596	0.00148593	3	134596	0.00222889	0	134596	0	8	134596	0.00594371	3	134596	0.00222889	3	134596	0.00222889	2	134596	0.00148593	0	134596	0
Gemmatimonadota	0.674635	0.0016982	0.00135923	0.00306473	0.00427507	0.00206379	0.00218099	0	134596	0	1	134596	0.000742964	2	134596	0.00148593	8	134596	0.00594371	2	134596	0.00148593	0	134596	0	18	134596	0.0133734	2	134596	0.00148593	1	134596	0.000742964	2	134596	0.00148593	10	134596	0.00742964	3	134596	0.00222889	2	134596	0.00148593	5	134596	0.00371482
Plantae	0.334808	0.0016982	0.00189271	0.00260037	0.0025737	0.00107317	0.00116746	3	134596	0.00222889	2	134596	0.00148593	0	134596	0	0	134596	0	8	134596	0.00594371	6	134596	0.00445778	9	134596	0.00668668	0	134596	0	3	134596	0.00222889	0	134596	0	2	134596	0.00148593	1	134596	0.000742964	5	134596	0.00371482	0	134596	0
SR1	0.0470649	0.00137979	0.00165792	0	0	0.000330206	0.000617759	0	134596	0	0	134596	0	0	134596	0	0	134596	0	0	134596	0	0	134596	0	0	134596	0	0	134596	0	0	134596	0	0	134596	0	0	134596	0	0	134596	0	0	134596	0	2	134596	0.00148593
Chlorobiota	0.348959	0.00116752	0.00124684	0.000371482	0.000525355	0.000577861	0.00109517	1	134596	0.000742964	0	134596	0	0	134596	0	0	134596	0	0	134596	0	2	134596	0.00148593	1	134596	0.000742964	0	134596	0	4	134596	0.00297186	0	134596	0	0	134596	0	0	134596	0	0	134596	0	0	134596	0
candidate_division_WPS_2	0.228811	0.00095524	0.00076537	0.000742964	0.00123207	0.000165103	0.000466982	0	134596	0	2	134596	0.00148593	1	134596	0.000742964	0	134596	0	5	134596	0.00371482	0	134596	0	0	134596	0	0	134596	0	0	134596	0	0	134596	0	2	134596	0.00148593	0	134596	0	0	134596	0	0	134596	0
Thermodesulfobacteriota	0.859266	0.000742964	0.000794262	0.000928705	0.000719372	0.000990619	0.000990619	2	134596	0.00148593	2	134596	0.00148593	1	134596	0.000742964	0	134596	0	1	134596	0.000742964	0	134596	0	3	134596	0.00222889	1	134596	0.000742964	4	134596	0.00297186	1	134596	0.000742964	0	134596	0	1	134596	0.000742964	3	134596	0.00222889	0	134596	0
Deinococcota	0.891859	0.000636826	0.000735344	0.000557223	0.00121799	0.000412758	0.000617759	1	134596	0.000742964	5	134596	0.00371482	0	134596	0	0	134596	0	0	134596	0	0	134596	0	0	134596	0	0	134596	0	0	134596	0	0	134596	0	0	134596	0	0	134596	0	0	134596	0	2	134596	0.00148593
Cloacimonetes	0.540404	0.000424551	0.000541198	0.000835835	0.000942533	0.00123827	0.00195004	0	134596	0	1	134596	0.000742964	0	134596	0	2	134596	0.00148593	1	134596	0.000742964	1	134596	0.000742964	4	134596	0.00297186	0	134596	0	0	134596	0	0	134596	0	1	134596	0.000742964	1	134596	0.000742964	0	134596	0	6	134596	0.00445778
Hydrogenedentes	0.641271	0.000318413	0.000541198	0.000185741	0.000491425	0.000495309	0.000783153	0	134596	0	0	134596	0	0	134596	0	0	134596	0	0	134596	0	0	134596	0	0	134596	0	2	134596	0.00148593	0	134596	0	0	134596	0	3	134596	0.00222889	0	134596	0	1	134596	0.000742964	0	134596	0
Atribacterota	0.0109025	0.000212275	0.000335637	0.00222889	0.00193028	0.000412758	0.000791807	0	134596	0	1	134596	0.000742964	3	134596	0.00222889	5	134596	0.00371482	1	134596	0.000742964	5	134596	0.00371482	1	134596	0.000742964	8	134596	0.00594371	0	134596	0	0	134596	0	0	134596	0	0	134596	0	0	134596	0	3	134596	0.00222889
candidate_division_ZB3	0.810955	0.000212275	0.000519967	0.000464353	0.000636688	0.000412758	0.000933964	0	134596	0	0	134596	0	0	134596	0	2	134596	0.00148593	1	134596	0.000742964	2	134596	0.00148593	0	134596	0	0	134596	0	4	134596	0.00297186	1	134596	0.000742964	0	134596	0	0	134596	0	0	134596	0	0	134596	0
Candidatus_Calescamantes	0.766047	0.000212275	0.000335637	9.28705e-05	0.000245712	0.000165103	0.00030888	1	134596	0.000742964	0	134596	0	0	134596	0	0	134596	0	0	134596	0	0	134596	0	0	134596	0	0	134596	0	0	134596	0	0	134596	0	0	134596	0	0	134596	0	1	134596	0.000742964	0	134596	0
Marinimicrobia	0.635464	0.000212275	0.000335637	9.28705e-05	0.000245712	8.25516e-05	0.000233491	0	134596	0	1	134596	0.000742964	0	134596	0	0	134596	0	0	134596	0	0	134596	0	0	134596	0	0	134596	0	0	134596	0	0	134596	0	0	134596	0	0	134596	0	0	134596	0	0	134596	0
Thermotogota	0.551637	0.000106138	0.000259983	0	0	0.000330206	0.000933964	0	134596	0	0	134596	0	0	134596	0	0	134596	0	0	134596	0	0	134596	0	0	134596	0	0	134596	0	0	134596	0	0	134596	0	0	134596	0	0	134596	0	0	134596	0	0	134596	0
[truncated: 30 more columns]

## Sheet: 3E
Supplementry Table 3E : Groupwise mean relative abundance (%) of bacterial phyla present at above one percent mean relative abundance in fecal samples.
Phylum	p-values	MS: mean rel. freq. (%)	MS: std. dev. (%)	20%MLM: mean rel. freq. (%)	20%MLM: std. dev. (%)	30%MLM: mean rel. freq. (%)	30%MLM: std. dev. (%)
Bacillota	0.19513	64.5483	5.66167	63.6786	1.79055	60.0912	5.76788
Bacteroidota	0.715714	18.397	2.27483	19.4874	1.57666	19.6342	4.16006
Pseudomonadota	0.14148	7.64648	3.72294	6.51858	1.69424	9.90578	3.77261
Verrucomicrobiota	0.521654	3.03395	0.967718	3.23394	1.59069	4.14557	2.67479
Synergistota	0.613453	2.61799	0.923822	2.50156	0.579965	2.22691	0.758438
Spirochaetota	0.60834	0.962351	0.384355	1.19617	0.526867	1.17529	0.454522
